# Supplementary material for: The Most Common VHL Point Mutation R167Q in Hereditary VHL Disease Interferes with Cell Plasticity Regulation
Source: Cancers (Basel). 2021 Aug 2;13(15):3897. doi: 10.3390/cancers13153897 (PMC8345752; doi:10.3390/cancers13153897)
Supplement: Supplementary file 1 [file cancers-13-03897-s001.zip › cancers-1304810-supp-Table S1.xlsx]

## Sheet: EV_vs_R167Q
Gene	log2FoldChange	padj	hgnc_symbol	description
ENSG00000000457	0.590794399387331	2.32365939281819e-05	SCYL3	SCY1 like pseudokinase 3 [Source:HGNC Symbol;Acc:HGNC:19285]
ENSG00000000971	1.29292736690092	3.15296454422147e-09	CFH	complement factor H [Source:HGNC Symbol;Acc:HGNC:4883]
ENSG00000001461	0.439801195525197	0.000172768845780847	NIPAL3	NIPA like domain containing 3 [Source:HGNC Symbol;Acc:HGNC:25233]
ENSG00000001617	1.78297812151076	1.3580248706551e-28	SEMA3F	semaphorin 3F [Source:HGNC Symbol;Acc:HGNC:10728]
ENSG00000002330	-1.13340337832776	4.59230319653117e-09	BAD	BCL2 associated agonist of cell death [Source:HGNC Symbol;Acc:HGNC:936]
ENSG00000002586	-1.27450060106789	1.29361314953306e-27	CD99	CD99 molecule (Xg blood group) [Source:HGNC Symbol;Acc:HGNC:7082]
ENSG00000002834	-0.823027699969157	4.99718580760877e-08	LASP1	LIM and SH3 protein 1 [Source:HGNC Symbol;Acc:HGNC:6513]
ENSG00000003249	-1.24270536020724	3.21095039463023e-09	DBNDD1	dysbindin domain containing 1 [Source:HGNC Symbol;Acc:HGNC:28455]
ENSG00000003987	3.52545778076967	0.000851162132659899	MTMR7	myotubularin related protein 7 [Source:HGNC Symbol;Acc:HGNC:7454]
ENSG00000004059	-0.474192163422415	3.0792373088557e-05	ARF5	ADP ribosylation factor 5 [Source:HGNC Symbol;Acc:HGNC:658]
ENSG00000004139	0.967057683576847	3.47331943784898e-07	SARM1	sterile alpha and TIR motif containing 1 [Source:HGNC Symbol;Acc:HGNC:17074]
ENSG00000004478	-0.618836848294883	1.78463490305551e-07	FKBP4	FKBP prolyl isomerase 4 [Source:HGNC Symbol;Acc:HGNC:3720]
ENSG00000004487	-0.677377432885818	6.50604566937003e-07	KDM1A	lysine demethylase 1A [Source:HGNC Symbol;Acc:HGNC:29079]
ENSG00000004660	-0.986580683773419	2.91525399846424e-09	CAMKK1	calcium/calmodulin dependent protein kinase kinase 1 [Source:HGNC Symbol;Acc:HGNC:1469]
ENSG00000004777	-1.59108121027908	2.552416528366e-09	ARHGAP33	Rho GTPase activating protein 33 [Source:HGNC Symbol;Acc:HGNC:23085]
ENSG00000004975	-0.756473194566249	1.67474402032179e-09	DVL2	dishevelled segment polarity protein 2 [Source:HGNC Symbol;Acc:HGNC:3086]
ENSG00000005001	3.79326906808988	0.000254147501047745	PRSS22	serine protease 22 [Source:HGNC Symbol;Acc:HGNC:14368]
ENSG00000005059	-0.542715989599814	4.01179781341487e-05	MCUB	mitochondrial calcium uniporter dominant negative beta subunit [Source:HGNC Symbol;Acc:HGNC:26076]
ENSG00000005075	-0.377710731561646	0.000643639263720706	POLR2J	RNA polymerase II subunit J [Source:HGNC Symbol;Acc:HGNC:9197]
ENSG00000005108	2.88713489473738	0.000291742945052207	THSD7A	thrombospondin type 1 domain containing 7A [Source:HGNC Symbol;Acc:HGNC:22207]
ENSG00000005187	1.65623649978155	8.39893588925878e-37	ACSM3	acyl-CoA synthetase medium chain family member 3 [Source:HGNC Symbol;Acc:HGNC:10522]
ENSG00000005249	-0.832895255702363	0.00020391190915826	PRKAR2B	protein kinase cAMP-dependent type II regulatory subunit beta [Source:HGNC Symbol;Acc:HGNC:9392]
ENSG00000005436	0.566387645951232	0.000150781995808022	GCFC2	GC-rich sequence DNA-binding factor 2 [Source:HGNC Symbol;Acc:HGNC:1317]
ENSG00000005471	2.09854945036603	7.13342222863703e-05	ABCB4	ATP binding cassette subfamily B member 4 [Source:HGNC Symbol;Acc:HGNC:45]
ENSG00000005812	-0.423276611815005	3.92364765318998e-05	FBXL3	F-box and leucine rich repeat protein 3 [Source:HGNC Symbol;Acc:HGNC:13599]
ENSG00000006007	0.402588047443327	0.000658775329740227	GDE1	glycerophosphodiester phosphodiesterase 1 [Source:HGNC Symbol;Acc:HGNC:29644]
ENSG00000006042	-2.99980050659675	4.75954143328724e-18	TMEM98	transmembrane protein 98 [Source:HGNC Symbol;Acc:HGNC:24529]
ENSG00000006062	-0.639530790197616	2.38594757017072e-05	MAP3K14	mitogen-activated protein kinase kinase kinase 14 [Source:HGNC Symbol;Acc:HGNC:6853]
ENSG00000006210	1.31907974009717	3.52194972711427e-41	CX3CL1	C-X3-C motif chemokine ligand 1 [Source:HGNC Symbol;Acc:HGNC:10647]
ENSG00000006327	0.604383110773126	5.31393640782452e-05	TNFRSF12A	TNF receptor superfamily member 12A [Source:HGNC Symbol;Acc:HGNC:18152]
ENSG00000006432	-1.09055524693708	9.19055319787858e-06	MAP3K9	mitogen-activated protein kinase kinase kinase 9 [Source:HGNC Symbol;Acc:HGNC:6861]
ENSG00000006451	-0.483266406106504	0.000379844684171242	RALA	RAS like proto-oncogene A [Source:HGNC Symbol;Acc:HGNC:9839]
ENSG00000006459	1.80850271888084	7.35899540140722e-07	KDM7A	lysine demethylase 7A [Source:HGNC Symbol;Acc:HGNC:22224]
ENSG00000006576	-1.18372033620252	1.45546980805468e-12	PHTF2	putative homeodomain transcription factor 2 [Source:HGNC Symbol;Acc:HGNC:13411]
ENSG00000006634	-0.336290710616938	0.000410073437057967	DBF4	DBF4 zinc finger [Source:HGNC Symbol;Acc:HGNC:17364]
ENSG00000006712	-0.517219629188274	0.000322807282649343	PAF1	PAF1 homolog, Paf1/RNA polymerase II complex component [Source:HGNC Symbol;Acc:HGNC:25459]
ENSG00000006788	-7.27900412707622	3.40665456798121e-11	MYH13	myosin heavy chain 13 [Source:HGNC Symbol;Acc:HGNC:7571]
ENSG00000007047	-0.785507994892969	1.64947656035842e-05	MARK4	microtubule affinity regulating kinase 4 [Source:HGNC Symbol;Acc:HGNC:13538]
ENSG00000007168	-0.596443307573374	1.08661731678676e-05	PAFAH1B1	platelet activating factor acetylhydrolase 1b regulatory subunit 1 [Source:HGNC Symbol;Acc:HGNC:8574]
ENSG00000007237	-1.9418882486444	3.79561971802038e-07	GAS7	growth arrest specific 7 [Source:HGNC Symbol;Acc:HGNC:4169]
ENSG00000007255	0.612063140742348	0.000771169775522344	TRAPPC6A	trafficking protein particle complex 6A [Source:HGNC Symbol;Acc:HGNC:23069]
ENSG00000007372	-0.584902750038943	0.000343999444696543	PAX6	paired box 6 [Source:HGNC Symbol;Acc:HGNC:8620]
ENSG00000007376	-0.534356093784553	1.60247252323141e-05	RPUSD1	RNA pseudouridine synthase domain containing 1 [Source:HGNC Symbol;Acc:HGNC:14173]
ENSG00000007968	-1.55087688301262	0.000239362542073856	E2F2	E2F transcription factor 2 [Source:HGNC Symbol;Acc:HGNC:3114]
ENSG00000008083	0.682508506540726	7.2825972904999e-07	JARID2	jumonji and AT-rich interaction domain containing 2 [Source:HGNC Symbol;Acc:HGNC:6196]
ENSG00000008294	0.538238648014186	0.000855762796630255	SPAG9	sperm associated antigen 9 [Source:HGNC Symbol;Acc:HGNC:14524]
ENSG00000008394	1.254124139152	1.03967130295947e-24	MGST1	microsomal glutathione S-transferase 1 [Source:HGNC Symbol;Acc:HGNC:7061]
ENSG00000008513	0.883447046078399	6.12965347197171e-07	ST3GAL1	ST3 beta-galactoside alpha-2,3-sialyltransferase 1 [Source:HGNC Symbol;Acc:HGNC:10862]
ENSG00000008853	-1.53296059362237	2.21471931052941e-07	RHOBTB2	Rho related BTB domain containing 2 [Source:HGNC Symbol;Acc:HGNC:18756]
ENSG00000009335	-0.409121199557496	0.000825425706707402	UBE3C	ubiquitin protein ligase E3C [Source:HGNC Symbol;Acc:HGNC:16803]
ENSG00000009413	0.702291127914537	1.40537847982401e-06	REV3L	REV3 like, DNA directed polymerase zeta catalytic subunit [Source:HGNC Symbol;Acc:HGNC:9968]
ENSG00000009844	-0.315395934852953	0.000844386068293574	VTA1	vesicle trafficking 1 [Source:HGNC Symbol;Acc:HGNC:20954]
ENSG00000010017	-0.554383342669886	5.77370565807925e-06	RANBP9	RAN binding protein 9 [Source:HGNC Symbol;Acc:HGNC:13727]
ENSG00000010030	3.38934912799017	2.22430597552344e-06	ETV7	ETS variant 7 [Source:HGNC Symbol;Acc:HGNC:18160]
ENSG00000010379	1.4789718966948	0.000319668977274327	SLC6A13	solute carrier family 6 member 13 [Source:HGNC Symbol;Acc:HGNC:11046]
ENSG00000011028	-0.489155872047152	2.9464033846325e-05	MRC2	mannose receptor C type 2 [Source:HGNC Symbol;Acc:HGNC:16875]
ENSG00000011105	-0.685004364613818	3.29488851623529e-05	TSPAN9	tetraspanin 9 [Source:HGNC Symbol;Acc:HGNC:21640]
ENSG00000011376	-0.448185323889824	3.12337997493166e-05	LARS2	leucyl-tRNA synthetase 2, mitochondrial [Source:HGNC Symbol;Acc:HGNC:17095]
ENSG00000011426	-1.23516148230882	1.31338310588772e-06	ANLN	anillin actin binding protein [Source:HGNC Symbol;Acc:HGNC:14082]
ENSG00000011485	-0.61739827631571	2.00733309743451e-09	PPP5C	protein phosphatase 5 catalytic subunit [Source:HGNC Symbol;Acc:HGNC:9322]
ENSG00000011566	0.570423723706524	2.38594757017072e-05	MAP4K3	mitogen-activated protein kinase kinase kinase kinase 3 [Source:HGNC Symbol;Acc:HGNC:6865]
ENSG00000011590	3.09745405591636	0.000182875587717243	ZBTB32	zinc finger and BTB domain containing 32 [Source:HGNC Symbol;Acc:HGNC:16763]
ENSG00000011638	0.967236562697233	1.26497505091324e-15	TMEM159	transmembrane protein 159 [Source:HGNC Symbol;Acc:HGNC:30136]
ENSG00000012124	2.88315913829426	3.71660697356372e-22	CD22	CD22 molecule [Source:HGNC Symbol;Acc:HGNC:1643]
ENSG00000012504	3.00416069705367	1.70890548819196e-18	NR1H4	nuclear receptor subfamily 1 group H member 4 [Source:HGNC Symbol;Acc:HGNC:7967]
ENSG00000012660	-0.385334163593228	6.91329417607701e-05	ELOVL5	ELOVL fatty acid elongase 5 [Source:HGNC Symbol;Acc:HGNC:21308]
ENSG00000012822	0.965134151988635	5.13665573794472e-20	CALCOCO1	calcium binding and coiled-coil domain 1 [Source:HGNC Symbol;Acc:HGNC:29306]
ENSG00000012963	-1.28107432144059	2.13085433961561e-13	UBR7	ubiquitin protein ligase E3 component n-recognin 7 (putative) [Source:HGNC Symbol;Acc:HGNC:20344]
ENSG00000013288	-0.372125336089316	0.000642231685000468	MAN2B2	mannosidase alpha class 2B member 2 [Source:HGNC Symbol;Acc:HGNC:29623]
ENSG00000013563	-0.413399351875388	1.43079059876268e-05	DNASE1L1	deoxyribonuclease 1 like 1 [Source:HGNC Symbol;Acc:HGNC:2957]
ENSG00000013573	-0.556936763409456	0.00039299769259766	DDX11	DEAD/H-box helicase 11 [Source:HGNC Symbol;Acc:HGNC:2736]
ENSG00000013619	-1.45967579420162	1.83536450604489e-12	MAMLD1	mastermind like domain containing 1 [Source:HGNC Symbol;Acc:HGNC:2568]
ENSG00000013810	-0.923690380603098	1.11882273520667e-07	TACC3	transforming acidic coiled-coil containing protein 3 [Source:HGNC Symbol;Acc:HGNC:11524]
ENSG00000014138	-0.835111015614946	3.19056619005998e-06	POLA2	DNA polymerase alpha 2, accessory subunit [Source:HGNC Symbol;Acc:HGNC:30073]
ENSG00000014164	-0.544955762775321	4.86494432728258e-05	ZC3H3	zinc finger CCCH-type containing 3 [Source:HGNC Symbol;Acc:HGNC:28972]
ENSG00000014216	-0.525565819018027	0.000259116130260304	CAPN1	calpain 1 [Source:HGNC Symbol;Acc:HGNC:1476]
ENSG00000015133	-1.13426159851967	5.80963213109173e-18	CCDC88C	coiled-coil domain containing 88C [Source:HGNC Symbol;Acc:HGNC:19967]
ENSG00000015475	0.507272858215546	2.97652454711023e-05	BID	BH3 interacting domain death agonist [Source:HGNC Symbol;Acc:HGNC:1050]
ENSG00000015479	-0.449039870931814	4.22486439010983e-06	MATR3	matrin 3 [Source:HGNC Symbol;Acc:HGNC:6912]
ENSG00000015532	-0.516716802566844	4.9134463408842e-06	XYLT2	xylosyltransferase 2 [Source:HGNC Symbol;Acc:HGNC:15517]
ENSG00000015568	1.12198426519087	5.49034188211658e-07	RGPD5	RANBP2 like and GRIP domain containing 5 [Source:HGNC Symbol;Acc:HGNC:32418]
ENSG00000015676	-0.639438405364559	1.18922907754867e-10	NUDCD3	NudC domain containing 3 [Source:HGNC Symbol;Acc:HGNC:22208]
ENSG00000016864	-0.60210462958281	8.2886202774175e-05	GLT8D1	glycosyltransferase 8 domain containing 1 [Source:HGNC Symbol;Acc:HGNC:24870]
ENSG00000017797	-0.609762501589119	7.23786401814276e-08	RALBP1	ralA binding protein 1 [Source:HGNC Symbol;Acc:HGNC:9841]
ENSG00000018189	1.16267671802144	2.3966527075142e-12	RUFY3	RUN and FYVE domain containing 3 [Source:HGNC Symbol;Acc:HGNC:30285]
ENSG00000018408	-0.854166743259887	2.0184389389224e-12	WWTR1	WW domain containing transcription regulator 1 [Source:HGNC Symbol;Acc:HGNC:24042]
ENSG00000018625	4.16518533392944	1.8512463235361e-08	ATP1A2	ATPase Na+/K+ transporting subunit alpha 2 [Source:HGNC Symbol;Acc:HGNC:800]
ENSG00000019169	4.05812641206829	2.83511538467969e-07	MARCO	macrophage receptor with collagenous structure [Source:HGNC Symbol;Acc:HGNC:6895]
ENSG00000019582	2.15633315761104	7.08209975094178e-94	CD74	CD74 molecule [Source:HGNC Symbol;Acc:HGNC:1697]
ENSG00000020922	-0.634190465486926	9.72592227821517e-06	MRE11	MRE11 homolog, double strand break repair nuclease [Source:HGNC Symbol;Acc:HGNC:7230]
ENSG00000021300	1.83772801544233	1.51143767749114e-19	PLEKHB1	pleckstrin homology domain containing B1 [Source:HGNC Symbol;Acc:HGNC:19079]
ENSG00000021645	-1.22292852163537	3.28540353236274e-08	NRXN3	neurexin 3 [Source:HGNC Symbol;Acc:HGNC:8010]
ENSG00000021762	-1.96259888555406	1.43510737306324e-11	OSBPL5	oxysterol binding protein like 5 [Source:HGNC Symbol;Acc:HGNC:16392]
ENSG00000023171	1.37873655691171	0.000757111096442514	GRAMD1B	GRAM domain containing 1B [Source:HGNC Symbol;Acc:HGNC:29214]
ENSG00000023191	-0.419617045985902	4.15527951421157e-06	RNH1	ribonuclease/angiogenin inhibitor 1 [Source:HGNC Symbol;Acc:HGNC:10074]
ENSG00000023572	0.637649145666928	0.000299835812810753	GLRX2	glutaredoxin 2 [Source:HGNC Symbol;Acc:HGNC:16065]
ENSG00000023608	1.38984145095175	2.28223978321749e-08	SNAPC1	small nuclear RNA activating complex polypeptide 1 [Source:HGNC Symbol;Acc:HGNC:11134]
ENSG00000023839	1.49935931380188	4.39901137868556e-14	ABCC2	ATP binding cassette subfamily C member 2 [Source:HGNC Symbol;Acc:HGNC:53]
ENSG00000024422	-3.22700913114016	2.68504800838263e-56	EHD2	EH domain containing 2 [Source:HGNC Symbol;Acc:HGNC:3243]
ENSG00000025039	1.06171951932397	5.54849959557183e-12	RRAGD	Ras related GTP binding D [Source:HGNC Symbol;Acc:HGNC:19903]
ENSG00000025293	-0.456153263452625	0.000487504814384765	PHF20	PHD finger protein 20 [Source:HGNC Symbol;Acc:HGNC:16098]
ENSG00000025770	-0.666479547586716	5.47270287561287e-05	NCAPH2	non-SMC condensin II complex subunit H2 [Source:HGNC Symbol;Acc:HGNC:25071]
ENSG00000026025	-0.99214556973453	2.79080074481473e-31	VIM	vimentin [Source:HGNC Symbol;Acc:HGNC:12692]
ENSG00000026036	-0.984983133241833	2.72487383224682e-06	RTEL1-TNFRSF6B	RTEL1-TNFRSF6B readthrough (NMD candidate) [Source:HGNC Symbol;Acc:HGNC:44095]
ENSG00000026297	-2.09034269915456	1.97460245478406e-17	RNASET2	ribonuclease T2 [Source:HGNC Symbol;Acc:HGNC:21686]
ENSG00000026751	-1.51480539943262	6.29860470262014e-07	SLAMF7	SLAM family member 7 [Source:HGNC Symbol;Acc:HGNC:21394]
ENSG00000027075	1.25857405143803	3.12874399797841e-11	PRKCH	protein kinase C eta [Source:HGNC Symbol;Acc:HGNC:9403]
ENSG00000028203	0.625207004373729	5.63567881966126e-06	VEZT	vezatin, adherens junctions transmembrane protein [Source:HGNC Symbol;Acc:HGNC:18258]
ENSG00000028310	-0.620292703072772	2.67234625873072e-11	BRD9	bromodomain containing 9 [Source:HGNC Symbol;Acc:HGNC:25818]
ENSG00000029534	2.00557675069445	4.30725820745462e-05	ANK1	ankyrin 1 [Source:HGNC Symbol;Acc:HGNC:492]
ENSG00000029725	-0.633477457159759	5.217750078761e-06	RABEP1	rabaptin, RAB GTPase binding effector protein 1 [Source:HGNC Symbol;Acc:HGNC:17677]
ENSG00000029993	-0.802684047949684	2.24762200861938e-09	HMGB3	high mobility group box 3 [Source:HGNC Symbol;Acc:HGNC:5004]
ENSG00000031698	1.40322767181649	4.51937741029142e-06	SARS	seryl-tRNA synthetase [Source:HGNC Symbol;Acc:HGNC:10537]
ENSG00000032219	-0.714692934849778	3.93949036764617e-06	ARID4A	AT-rich interaction domain 4A [Source:HGNC Symbol;Acc:HGNC:9885]
ENSG00000033100	-0.664017041661349	0.000322611381211489	CHPF2	chondroitin polymerizing factor 2 [Source:HGNC Symbol;Acc:HGNC:29270]
ENSG00000033170	-0.384478210572537	0.000677828212152533	FUT8	fucosyltransferase 8 [Source:HGNC Symbol;Acc:HGNC:4019]
ENSG00000033178	-1.05961792463316	2.89639366927355e-09	UBA6	ubiquitin like modifier activating enzyme 6 [Source:HGNC Symbol;Acc:HGNC:25581]
ENSG00000033627	0.960930498610315	4.02295656086767e-09	ATP6V0A1	ATPase H+ transporting V0 subunit a1 [Source:HGNC Symbol;Acc:HGNC:865]
ENSG00000034533	-0.54591914137478	0.000157053080184471	ASTE1	asteroid homolog 1 [Source:HGNC Symbol;Acc:HGNC:25021]
ENSG00000034713	0.46087085107745	2.64266018384927e-06	GABARAPL2	GABA type A receptor associated protein like 2 [Source:HGNC Symbol;Acc:HGNC:13291]
ENSG00000035403	-0.757601458101397	1.15394965036077e-05	VCL	vinculin [Source:HGNC Symbol;Acc:HGNC:12665]
ENSG00000035499	-0.688254141939681	1.32523274683332e-05	DEPDC1B	DEP domain containing 1B [Source:HGNC Symbol;Acc:HGNC:24902]
ENSG00000035928	0.786034504326021	0.000161146876785513	RFC1	replication factor C subunit 1 [Source:HGNC Symbol;Acc:HGNC:9969]
ENSG00000036549	0.647416087810589	2.87663472023348e-08		zinc finger ZZ-type containing 3 [Source:NCBI gene;Acc:26009]
ENSG00000038002	0.577545567708392	0.000439109495155429	AGA	aspartylglucosaminidase [Source:HGNC Symbol;Acc:HGNC:318]
ENSG00000038210	-0.719728117564064	9.79475481651125e-08	PI4K2B	phosphatidylinositol 4-kinase type 2 beta [Source:HGNC Symbol;Acc:HGNC:18215]
ENSG00000038295	1.56936264574315	0.000862839393717645	TLL1	tolloid like 1 [Source:HGNC Symbol;Acc:HGNC:11843]
ENSG00000038382	-1.0442387480882	8.31815709510897e-19	TRIO	trio Rho guanine nucleotide exchange factor [Source:HGNC Symbol;Acc:HGNC:12303]
ENSG00000038427	-0.993892928053358	3.96697456380806e-07	VCAN	versican [Source:HGNC Symbol;Acc:HGNC:2464]
ENSG00000039139	-1.11581695813653	8.90350154279034e-13	DNAH5	dynein axonemal heavy chain 5 [Source:HGNC Symbol;Acc:HGNC:2950]
ENSG00000041353	1.27967082618906	3.71347632298614e-14	RAB27B	RAB27B, member RAS oncogene family [Source:HGNC Symbol;Acc:HGNC:9767]
ENSG00000041982	1.89123279659079	1.46396028119546e-07	TNC	tenascin C [Source:HGNC Symbol;Acc:HGNC:5318]
ENSG00000042088	-1.02582487358926	2.65348911698435e-15	TDP1	tyrosyl-DNA phosphodiesterase 1 [Source:HGNC Symbol;Acc:HGNC:18884]
ENSG00000042286	1.71743105451344	7.14722029086172e-17	AIFM2	apoptosis inducing factor mitochondria associated 2 [Source:HGNC Symbol;Acc:HGNC:21411]
ENSG00000042445	0.612340972643355	5.19149103406101e-11	RETSAT	retinol saturase [Source:HGNC Symbol;Acc:HGNC:25991]
ENSG00000044446	-0.81095750270908	7.63162174275433e-05	PHKA2	phosphorylase kinase regulatory subunit alpha 2 [Source:HGNC Symbol;Acc:HGNC:8926]
ENSG00000044574	1.57042858387776	3.39661722600232e-07	HSPA5	heat shock protein family A (Hsp70) member 5 [Source:HGNC Symbol;Acc:HGNC:5238]
ENSG00000046604	-0.750330546592696	3.26771307350011e-07	DSG2	desmoglein 2 [Source:HGNC Symbol;Acc:HGNC:3049]
ENSG00000046889	-1.4403627837024	4.06421709190942e-10	PREX2	phosphatidylinositol-3,4,5-trisphosphate dependent Rac exchange factor 2 [Source:HGNC Symbol;Acc:HGNC:22950]
ENSG00000047230	-0.947552558448693	3.82344380264581e-07	CTPS2	CTP synthase 2 [Source:HGNC Symbol;Acc:HGNC:2520]
ENSG00000047457	-1.13718792155313	2.54023675235629e-06	CP	ceruloplasmin [Source:HGNC Symbol;Acc:HGNC:2295]
ENSG00000047579	-0.822949010176756	6.76485384046365e-07	DTNBP1	dystrobrevin binding protein 1 [Source:HGNC Symbol;Acc:HGNC:17328]
ENSG00000047597	2.5378946244583	4.91762539272108e-13	XK	X-linked Kx blood group [Source:HGNC Symbol;Acc:HGNC:12811]
ENSG00000047621	0.523697791248817	0.000689305027682249	C12orf4	chromosome 12 open reading frame 4 [Source:HGNC Symbol;Acc:HGNC:1184]
ENSG00000047634	-0.547428364826032	3.16507899918741e-06	SCML1	Scm polycomb group protein like 1 [Source:HGNC Symbol;Acc:HGNC:10580]
ENSG00000048052	0.880836685328373	5.95413592157529e-08	HDAC9	histone deacetylase 9 [Source:HGNC Symbol;Acc:HGNC:14065]
ENSG00000048140	-0.49379733792848	1.30767737901414e-06	TSPAN17	tetraspanin 17 [Source:HGNC Symbol;Acc:HGNC:13594]
ENSG00000048392	0.891839677620078	5.24840002247804e-06	RRM2B	ribonucleotide reductase regulatory TP53 inducible subunit M2B [Source:HGNC Symbol;Acc:HGNC:17296]
ENSG00000049089	3.51279419038014	1.85531266962291e-14	COL9A2	collagen type IX alpha 2 chain [Source:HGNC Symbol;Acc:HGNC:2218]
ENSG00000049249	2.62924901253977	1.08495868003315e-12	TNFRSF9	TNF receptor superfamily member 9 [Source:HGNC Symbol;Acc:HGNC:11924]
ENSG00000049541	-0.882299489714321	3.87394146268821e-08	RFC2	replication factor C subunit 2 [Source:HGNC Symbol;Acc:HGNC:9970]
ENSG00000050165	-0.504813824839745	1.57639028567008e-05	DKK3	dickkopf WNT signaling pathway inhibitor 3 [Source:HGNC Symbol;Acc:HGNC:2893]
ENSG00000050393	-0.419017646766387	0.00018421943217849	MCUR1	mitochondrial calcium uniporter regulator 1 [Source:HGNC Symbol;Acc:HGNC:21097]
ENSG00000050405	1.45635680680398	2.09789652273155e-18	LIMA1	LIM domain and actin binding 1 [Source:HGNC Symbol;Acc:HGNC:24636]
ENSG00000050426	0.789571307040981	1.33507950804364e-05	LETMD1	LETM1 domain containing 1 [Source:HGNC Symbol;Acc:HGNC:24241]
ENSG00000050438	-1.48124426305339	1.03752612877388e-05	SLC4A8	solute carrier family 4 member 8 [Source:HGNC Symbol;Acc:HGNC:11034]
ENSG00000050730	2.22654586584893	0.000354149696195887	TNIP3	TNFAIP3 interacting protein 3 [Source:HGNC Symbol;Acc:HGNC:19315]
ENSG00000050748	-0.460815923163429	6.39993691804626e-07	MAPK9	mitogen-activated protein kinase 9 [Source:HGNC Symbol;Acc:HGNC:6886]
ENSG00000051108	0.965467441812089	5.99054597568827e-14	HERPUD1	homocysteine inducible ER protein with ubiquitin like domain 1 [Source:HGNC Symbol;Acc:HGNC:13744]
ENSG00000051180	-1.16803449138583	1.81356889824403e-07	RAD51	RAD51 recombinase [Source:HGNC Symbol;Acc:HGNC:9817]
ENSG00000053254	-0.673964481876285	3.57289052092886e-05	FOXN3	forkhead box N3 [Source:HGNC Symbol;Acc:HGNC:1928]
ENSG00000054148	-0.543534404412186	0.000337333507758677	PHPT1	phosphohistidine phosphatase 1 [Source:HGNC Symbol;Acc:HGNC:30033]
ENSG00000054277	-2.86167331684647	4.35925415631584e-19	OPN3	opsin 3 [Source:HGNC Symbol;Acc:HGNC:14007]
ENSG00000054654	-0.803901829272797	1.34191370988343e-05	SYNE2	spectrin repeat containing nuclear envelope protein 2 [Source:HGNC Symbol;Acc:HGNC:17084]
ENSG00000054965	-1.00334286964508	0.00031283155114911	FAM168A	family with sequence similarity 168 member A [Source:HGNC Symbol;Acc:HGNC:28999]
ENSG00000054967	-0.844704905782943	8.55021765175739e-15	RELT	RELT TNF receptor [Source:HGNC Symbol;Acc:HGNC:13764]
ENSG00000055130	-0.535628445423389	1.00134640199822e-05	CUL1	cullin 1 [Source:HGNC Symbol;Acc:HGNC:2551]
ENSG00000055211	-0.37633268477821	0.000119281460628709	GINM1	glycoprotein integral membrane 1 [Source:HGNC Symbol;Acc:HGNC:21074]
ENSG00000055483	0.759843776051533	0.000825598893773311	USP36	ubiquitin specific peptidase 36 [Source:HGNC Symbol;Acc:HGNC:20062]
ENSG00000055732	1.09690161224274	6.2009605181991e-16	MCOLN3	mucolipin 3 [Source:HGNC Symbol;Acc:HGNC:13358]
ENSG00000055950	-0.551476476394738	0.000155053502543042	MRPL43	mitochondrial ribosomal protein L43 [Source:HGNC Symbol;Acc:HGNC:14517]
ENSG00000056558	3.59750047080068	2.42131769758532e-55	TRAF1	TNF receptor associated factor 1 [Source:HGNC Symbol;Acc:HGNC:12031]
ENSG00000056972	0.749731003274575	3.44337271197922e-07	TRAF3IP2	TRAF3 interacting protein 2 [Source:HGNC Symbol;Acc:HGNC:1343]
ENSG00000057252	0.779584379682783	1.06863268935161e-05	SOAT1	sterol O-acyltransferase 1 [Source:HGNC Symbol;Acc:HGNC:11177]
ENSG00000057608	-0.458293978704615	6.88467750395173e-07	GDI2	GDP dissociation inhibitor 2 [Source:HGNC Symbol;Acc:HGNC:4227]
ENSG00000057704	1.61083566282374	1.9247897998313e-17	TMCC3	transmembrane and coiled-coil domain family 3 [Source:HGNC Symbol;Acc:HGNC:29199]
ENSG00000058085	1.91055502489413	3.75939123058345e-18	LAMC2	laminin subunit gamma 2 [Source:HGNC Symbol;Acc:HGNC:6493]
ENSG00000058335	1.41038730118259	1.63734489766348e-06	RASGRF1	Ras protein specific guanine nucleotide releasing factor 1 [Source:HGNC Symbol;Acc:HGNC:9875]
ENSG00000058453	-0.831600427133165	1.26200370139036e-09	CROCC	ciliary rootlet coiled-coil, rootletin [Source:HGNC Symbol;Acc:HGNC:21299]
ENSG00000058673	0.548286045744906	2.3673833444639e-08	ZC3H11A	zinc finger CCCH-type containing 11A [Source:HGNC Symbol;Acc:HGNC:29093]
ENSG00000058799	0.763614482259433	2.91993944537674e-06	YIPF1	Yip1 domain family member 1 [Source:HGNC Symbol;Acc:HGNC:25231]
ENSG00000058804	-0.564885619087895	0.000820129193111588	NDC1	NDC1 transmembrane nucleoporin [Source:HGNC Symbol;Acc:HGNC:25525]
ENSG00000059122	0.705772842117059	3.20975483976544e-10	FLYWCH1	FLYWCH-type zinc finger 1 [Source:HGNC Symbol;Acc:HGNC:25404]
ENSG00000059573	-0.523302459211116	0.000298105262740511	ALDH18A1	aldehyde dehydrogenase 18 family member A1 [Source:HGNC Symbol;Acc:HGNC:9722]
ENSG00000059728	2.2898336420047	1.67793759488049e-09	MXD1	MAX dimerization protein 1 [Source:HGNC Symbol;Acc:HGNC:6761]
ENSG00000059758	0.92260340895716	9.97275631901628e-06	CDK17	cyclin dependent kinase 17 [Source:HGNC Symbol;Acc:HGNC:8750]
ENSG00000060642	0.629871878693184	1.89840387074971e-07	PIGV	phosphatidylinositol glycan anchor biosynthesis class V [Source:HGNC Symbol;Acc:HGNC:26031]
ENSG00000060656	-2.74717360675898	1.62348992571408e-28	PTPRU	protein tyrosine phosphatase receptor type U [Source:HGNC Symbol;Acc:HGNC:9683]
ENSG00000060971	-0.383360107340291	0.000126185259667676	ACAA1	acetyl-CoA acyltransferase 1 [Source:HGNC Symbol;Acc:HGNC:82]
ENSG00000060982	1.29250351736064	8.71896404655658e-08	BCAT1	branched chain amino acid transaminase 1 [Source:HGNC Symbol;Acc:HGNC:976]
ENSG00000061656	-0.897460785495544	1.34595485456853e-11	SPAG4	sperm associated antigen 4 [Source:HGNC Symbol;Acc:HGNC:11214]
ENSG00000061938	-0.708400502461777	2.52504487961476e-11	TNK2	tyrosine kinase non receptor 2 [Source:HGNC Symbol;Acc:HGNC:19297]
ENSG00000062038	1.71235222811879	0.000951412941021862	CDH3	cadherin 3 [Source:HGNC Symbol;Acc:HGNC:1762]
ENSG00000062282	2.27825908064379	5.0397981111027e-09	DGAT2	diacylglycerol O-acyltransferase 2 [Source:HGNC Symbol;Acc:HGNC:16940]
ENSG00000062485	-0.398986312704877	0.000133410198926786	CS	citrate synthase [Source:HGNC Symbol;Acc:HGNC:2422]
ENSG00000062822	-1.47103625728959	3.74669202889654e-10	POLD1	DNA polymerase delta 1, catalytic subunit [Source:HGNC Symbol;Acc:HGNC:9175]
ENSG00000063180	0.711258521528634	6.30759015659595e-05	CA11	carbonic anhydrase 11 [Source:HGNC Symbol;Acc:HGNC:1370]
ENSG00000063660	-0.983725765934875	0.000400416776735419	GPC1	glypican 1 [Source:HGNC Symbol;Acc:HGNC:4449]
ENSG00000064012	0.66380274645476	1.32000372158205e-06	CASP8	caspase 8 [Source:HGNC Symbol;Acc:HGNC:1509]
ENSG00000064309	-1.75359365378829	7.11517083032861e-07	CDON	cell adhesion associated, oncogene regulated [Source:HGNC Symbol;Acc:HGNC:17104]
ENSG00000064393	-0.760789042719647	0.000455529491436752	HIPK2	homeodomain interacting protein kinase 2 [Source:HGNC Symbol;Acc:HGNC:14402]
ENSG00000064490	0.447210628393434	0.000606408695366185	RFXANK	regulatory factor X associated ankyrin containing protein [Source:HGNC Symbol;Acc:HGNC:9987]
ENSG00000064547	0.585490513806677	0.00029958082630046	LPAR2	lysophosphatidic acid receptor 2 [Source:HGNC Symbol;Acc:HGNC:3168]
ENSG00000064666	-0.718940304012096	3.07031010039057e-11	CNN2	calponin 2 [Source:HGNC Symbol;Acc:HGNC:2156]
ENSG00000064886	2.4342400028592	0.000205855756528878	CHI3L2	chitinase 3 like 2 [Source:HGNC Symbol;Acc:HGNC:1933]
ENSG00000064989	2.53887624163401	2.99853692272914e-05	CALCRL	calcitonin receptor like receptor [Source:HGNC Symbol;Acc:HGNC:16709]
ENSG00000065154	-0.60037441709509	7.44501890968038e-05	OAT	ornithine aminotransferase [Source:HGNC Symbol;Acc:HGNC:8091]
ENSG00000065308	-1.66492322267251	8.64254488009878e-42	TRAM2	translocation associated membrane protein 2 [Source:HGNC Symbol;Acc:HGNC:16855]
ENSG00000065328	-1.37672088685707	6.0517193658923e-08	MCM10	minichromosome maintenance 10 replication initiation factor [Source:HGNC Symbol;Acc:HGNC:18043]
ENSG00000065485	-1.02747546141277	3.31585923063803e-08	PDIA5	protein disulfide isomerase family A member 5 [Source:HGNC Symbol;Acc:HGNC:24811]
ENSG00000065534	-0.841353050577778	1.8700716634061e-06	MYLK	myosin light chain kinase [Source:HGNC Symbol;Acc:HGNC:7590]
ENSG00000065802	1.1726629401968	1.24552339219236e-05	ASB1	ankyrin repeat and SOCS box containing 1 [Source:HGNC Symbol;Acc:HGNC:16011]
ENSG00000065833	0.537952594408434	1.10842506127576e-05	ME1	malic enzyme 1 [Source:HGNC Symbol;Acc:HGNC:6983]
ENSG00000065882	-0.783348137587791	1.27083626949253e-10	TBC1D1	TBC1 domain family member 1 [Source:HGNC Symbol;Acc:HGNC:11578]
ENSG00000065911	1.53582305928464	6.40161936506821e-05	MTHFD2	methylenetetrahydrofolate dehydrogenase (NADP+ dependent) 2, methenyltetrahydrofolate cyclohydrolase [Source:HGNC Symbol;Acc:HGNC:7434]
ENSG00000066044	-0.555588459214093	2.76663097040792e-05	ELAVL1	ELAV like RNA binding protein 1 [Source:HGNC Symbol;Acc:HGNC:3312]
ENSG00000066135	0.742670690690558	3.60616936107213e-06	KDM4A	lysine demethylase 4A [Source:HGNC Symbol;Acc:HGNC:22978]
ENSG00000066230	-0.9488394413235	2.5257259049564e-07	SLC9A3	solute carrier family 9 member A3 [Source:HGNC Symbol;Acc:HGNC:11073]
ENSG00000066248	1.98023301171435	2.43426908041473e-52	NGEF	neuronal guanine nucleotide exchange factor [Source:HGNC Symbol;Acc:HGNC:7807]
ENSG00000066322	-0.395441280955272	0.000191673171470264	ELOVL1	ELOVL fatty acid elongase 1 [Source:HGNC Symbol;Acc:HGNC:14418]
ENSG00000066468	-1.64856402766464	5.60085755289846e-05	FGFR2	fibroblast growth factor receptor 2 [Source:HGNC Symbol;Acc:HGNC:3689]
ENSG00000066697	-0.503013291786418	7.63301553010458e-07	MSANTD3	Myb/SANT DNA binding domain containing 3 [Source:HGNC Symbol;Acc:HGNC:23370]
ENSG00000067057	-1.3037691570199	3.06723019801098e-26	PFKP	phosphofructokinase, platelet [Source:HGNC Symbol;Acc:HGNC:8878]
ENSG00000067064	-0.90693198482023	0.000192508524465196	IDI1	isopentenyl-diphosphate delta isomerase 1 [Source:HGNC Symbol;Acc:HGNC:5387]
ENSG00000067066	0.572851012368644	0.000123641721624668	SP100	SP100 nuclear antigen [Source:HGNC Symbol;Acc:HGNC:11206]
ENSG00000067082	-0.927309628847235	1.00766704155913e-17	KLF6	Kruppel like factor 6 [Source:HGNC Symbol;Acc:HGNC:2235]
ENSG00000067208	0.628471749811442	1.77072779708083e-05	EVI5	ecotropic viral integration site 5 [Source:HGNC Symbol;Acc:HGNC:3501]
ENSG00000067560	-0.424088710197692	5.54566009610802e-05	RHOA	ras homolog family member A [Source:HGNC Symbol;Acc:HGNC:667]
ENSG00000067715	2.17156682719446	1.01104034884098e-14	SYT1	synaptotagmin 1 [Source:HGNC Symbol;Acc:HGNC:11509]
ENSG00000068001	-0.726954896288897	3.65747981061983e-06	HYAL2	hyaluronidase 2 [Source:HGNC Symbol;Acc:HGNC:5321]
ENSG00000068078	-1.40324962076091	0.000340208534182828	FGFR3	fibroblast growth factor receptor 3 [Source:HGNC Symbol;Acc:HGNC:3690]
ENSG00000068079	1.26189468996819	2.59372137078906e-10	IFI35	interferon induced protein 35 [Source:HGNC Symbol;Acc:HGNC:5399]
ENSG00000068354	-0.508131820130223	0.0003296642687893	TBC1D25	TBC1 domain family member 25 [Source:HGNC Symbol;Acc:HGNC:8092]
ENSG00000068394	-0.437623102565007	0.000764883933896861	GPKOW	G-patch domain and KOW motifs [Source:HGNC Symbol;Acc:HGNC:30677]
ENSG00000068438	-0.293073443772607	0.000222773264035222	FTSJ1	FtsJ RNA 2'-O-methyltransferase 1 [Source:HGNC Symbol;Acc:HGNC:13254]
ENSG00000068489	-0.618074627320334	1.721898196057e-06	PRR11	proline rich 11 [Source:HGNC Symbol;Acc:HGNC:25619]
ENSG00000068903	-0.50899168941465	0.000311293641054267	SIRT2	sirtuin 2 [Source:HGNC Symbol;Acc:HGNC:10886]
ENSG00000068971	0.564383629670631	0.000361806399715451	PPP2R5B	protein phosphatase 2 regulatory subunit B'beta [Source:HGNC Symbol;Acc:HGNC:9310]
ENSG00000069011	-1.222257972366	6.64213625961707e-15	PITX1	paired like homeodomain 1 [Source:HGNC Symbol;Acc:HGNC:9004]
ENSG00000069020	1.57659694739175	1.24470851660601e-07	MAST4	microtubule associated serine/threonine kinase family member 4 [Source:HGNC Symbol;Acc:HGNC:19037]
ENSG00000069188	2.62387128226644	8.34721953062953e-08	SDK2	sidekick cell adhesion molecule 2 [Source:HGNC Symbol;Acc:HGNC:19308]
ENSG00000069431	2.66438042597606	0.000257083929418395	ABCC9	ATP binding cassette subfamily C member 9 [Source:HGNC Symbol;Acc:HGNC:60]
ENSG00000069493	1.08708339799939	4.75616508984922e-08	CLEC2D	C-type lectin domain family 2 member D [Source:HGNC Symbol;Acc:HGNC:14351]
ENSG00000069812	1.72304074719347	1.59946864671031e-07	HES2	hes family bHLH transcription factor 2 [Source:HGNC Symbol;Acc:HGNC:16005]
ENSG00000069956	0.688315445764151	0.000124815934205757	MAPK6	mitogen-activated protein kinase 6 [Source:HGNC Symbol;Acc:HGNC:6879]
ENSG00000069974	-0.580674062794085	0.000172010417641982	RAB27A	RAB27A, member RAS oncogene family [Source:HGNC Symbol;Acc:HGNC:9766]
ENSG00000070047	-0.891033127230591	1.69192035842633e-10	PHRF1	PHD and ring finger domains 1 [Source:HGNC Symbol;Acc:HGNC:24351]
ENSG00000070182	1.76722410259604	4.23223882621677e-06	SPTB	spectrin beta, erythrocytic [Source:HGNC Symbol;Acc:HGNC:11274]
ENSG00000070367	-0.580179810112161	5.44752182914043e-05	EXOC5	exocyst complex component 5 [Source:HGNC Symbol;Acc:HGNC:10696]
ENSG00000070371	1.56441224409701	9.34366445606657e-06	CLTCL1	clathrin heavy chain like 1 [Source:HGNC Symbol;Acc:HGNC:2093]
ENSG00000070413	-0.593256111710974	1.39522794980652e-05	DGCR2	DiGeorge syndrome critical region gene 2 [Source:HGNC Symbol;Acc:HGNC:2845]
ENSG00000070540	1.17916928961766	2.29657493065123e-15	WIPI1	WD repeat domain, phosphoinositide interacting 1 [Source:HGNC Symbol;Acc:HGNC:25471]
ENSG00000070614	-0.601968759354191	6.76485384046365e-07	NDST1	N-deacetylase and N-sulfotransferase 1 [Source:HGNC Symbol;Acc:HGNC:7680]
ENSG00000070669	2.30428900079966	5.81885448143955e-05	ASNS	asparagine synthetase (glutamine-hydrolyzing) [Source:HGNC Symbol;Acc:HGNC:753]
ENSG00000070778	-0.618144906326953	3.78630393035236e-05	PTPN21	protein tyrosine phosphatase non-receptor type 21 [Source:HGNC Symbol;Acc:HGNC:9651]
ENSG00000070814	-0.573499854581473	7.14634577672607e-08	TCOF1	treacle ribosome biogenesis factor 1 [Source:HGNC Symbol;Acc:HGNC:11654]
ENSG00000070915	3.22314261403527	2.90716639439472e-15	SLC12A3	solute carrier family 12 member 3 [Source:HGNC Symbol;Acc:HGNC:10912]
ENSG00000070961	0.690474691106781	0.000497942001714902	ATP2B1	ATPase plasma membrane Ca2+ transporting 1 [Source:HGNC Symbol;Acc:HGNC:814]
ENSG00000071051	-0.496661177610648	0.000500553788408837	NCK2	NCK adaptor protein 2 [Source:HGNC Symbol;Acc:HGNC:7665]
ENSG00000071054	0.586887729914935	9.95831315833897e-06	MAP4K4	mitogen-activated protein kinase kinase kinase kinase 4 [Source:HGNC Symbol;Acc:HGNC:6866]
ENSG00000071127	-0.465523306952785	9.09133883685444e-05	WDR1	WD repeat domain 1 [Source:HGNC Symbol;Acc:HGNC:12754]
ENSG00000071205	-0.87829305937813	3.86258219316065e-09	ARHGAP10	Rho GTPase activating protein 10 [Source:HGNC Symbol;Acc:HGNC:26099]
ENSG00000071282	-1.459858290482	6.85964890055466e-06	LMCD1	LIM and cysteine rich domains 1 [Source:HGNC Symbol;Acc:HGNC:6633]
ENSG00000071539	-0.590780822596236	1.02972243603154e-09	TRIP13	thyroid hormone receptor interactor 13 [Source:HGNC Symbol;Acc:HGNC:12307]
ENSG00000071553	-0.364384344883277	1.83325834925023e-05	ATP6AP1	ATPase H+ transporting accessory protein 1 [Source:HGNC Symbol;Acc:HGNC:868]
ENSG00000071564	-0.714355980602067	1.83394848221979e-06	TCF3	transcription factor 3 [Source:HGNC Symbol;Acc:HGNC:11633]
ENSG00000071575	-3.9164809351734	5.71086281134129e-06	TRIB2	tribbles pseudokinase 2 [Source:HGNC Symbol;Acc:HGNC:30809]
ENSG00000071626	-0.370905976921581	5.32865235402187e-06	DAZAP1	DAZ associated protein 1 [Source:HGNC Symbol;Acc:HGNC:2683]
ENSG00000071889	-0.456064482921503	0.000441504622440559	FAM3A	family with sequence similarity 3 member A [Source:HGNC Symbol;Acc:HGNC:13749]
ENSG00000071894	-1.05072634287626	6.70939156782171e-35	CPSF1	cleavage and polyadenylation specific factor 1 [Source:HGNC Symbol;Acc:HGNC:2324]
ENSG00000072071	1.50565814751987	3.97577504790577e-42	ADGRL1	adhesion G protein-coupled receptor L1 [Source:HGNC Symbol;Acc:HGNC:20973]
ENSG00000072110	-1.18853007522939	1.0873419551521e-29	ACTN1	actinin alpha 1 [Source:HGNC Symbol;Acc:HGNC:163]
ENSG00000072163	-3.38977963715039	5.60348783305457e-33	LIMS2	LIM zinc finger domain containing 2 [Source:HGNC Symbol;Acc:HGNC:16084]
ENSG00000072274	-0.70489406573361	2.5257259049564e-07	TFRC	transferrin receptor [Source:HGNC Symbol;Acc:HGNC:11763]
ENSG00000072422	-1.19786201802714	6.11849245731236e-05	RHOBTB1	Rho related BTB domain containing 1 [Source:HGNC Symbol;Acc:HGNC:18738]
ENSG00000072501	-0.778235039808793	6.03767376523811e-05	SMC1A	structural maintenance of chromosomes 1A [Source:HGNC Symbol;Acc:HGNC:11111]
ENSG00000072682	-0.628152652215136	2.72554899173053e-08	P4HA2	prolyl 4-hydroxylase subunit alpha 2 [Source:HGNC Symbol;Acc:HGNC:8547]
ENSG00000072778	0.363134864302283	0.000260390571081151	ACADVL	acyl-CoA dehydrogenase very long chain [Source:HGNC Symbol;Acc:HGNC:92]
ENSG00000072849	-0.576147237345128	6.99394407839096e-07	DERL2	derlin 2 [Source:HGNC Symbol;Acc:HGNC:17943]
ENSG00000072958	-0.670500244245217	5.98767508704587e-07	AP1M1	adaptor related protein complex 1 subunit mu 1 [Source:HGNC Symbol;Acc:HGNC:13667]
ENSG00000073008	-0.598572474521516	9.48874730027279e-06	PVR	PVR cell adhesion molecule [Source:HGNC Symbol;Acc:HGNC:9705]
ENSG00000073050	-0.622419626523096	2.12477972787382e-05	XRCC1	X-ray repair cross complementing 1 [Source:HGNC Symbol;Acc:HGNC:12828]
ENSG00000073060	-1.0424959072653	3.83835185649773e-21	SCARB1	scavenger receptor class B member 1 [Source:HGNC Symbol;Acc:HGNC:1664]
ENSG00000073111	-1.29333604146698	9.29007681535456e-11	MCM2	minichromosome maintenance complex component 2 [Source:HGNC Symbol;Acc:HGNC:6944]
ENSG00000073146	3.98206971841648	4.61085542453638e-05	MOV10L1	Mov10 like RISC complex RNA helicase 1 [Source:HGNC Symbol;Acc:HGNC:7201]
ENSG00000073150	0.867374658839557	1.47273899819411e-13	PANX2	pannexin 2 [Source:HGNC Symbol;Acc:HGNC:8600]
ENSG00000073331	0.92450132595088	1.73371530213034e-08	ALPK1	alpha kinase 1 [Source:HGNC Symbol;Acc:HGNC:20917]
ENSG00000073464	0.943992366758478	4.72998312084326e-10	CLCN4	chloride voltage-gated channel 4 [Source:HGNC Symbol;Acc:HGNC:2022]
ENSG00000073578	-0.681486044542919	7.73925169475526e-06	SDHA	succinate dehydrogenase complex flavoprotein subunit A [Source:HGNC Symbol;Acc:HGNC:10680]
ENSG00000073584	-0.565137868750447	0.000610122275300533	SMARCE1	SWI/SNF related, matrix associated, actin dependent regulator of chromatin, subfamily e, member 1 [Source:HGNC Symbol;Acc:HGNC:11109]
ENSG00000073711	-0.638517775550795	0.00022805278023246	PPP2R3A	protein phosphatase 2 regulatory subunit B''alpha [Source:HGNC Symbol;Acc:HGNC:9307]
ENSG00000073712	-0.73273728211071	7.74562549754693e-09	FERMT2	fermitin family member 2 [Source:HGNC Symbol;Acc:HGNC:15767]
ENSG00000073737	1.68324822384011	0.000777456422986038	DHRS9	dehydrogenase/reductase 9 [Source:HGNC Symbol;Acc:HGNC:16888]
ENSG00000073792	-0.745161709333955	3.26069163209156e-05	IGF2BP2	insulin like growth factor 2 mRNA binding protein 2 [Source:HGNC Symbol;Acc:HGNC:28867]
ENSG00000074356	-0.672167197890068	2.73395269579654e-06	NCBP3	nuclear cap binding subunit 3 [Source:HGNC Symbol;Acc:HGNC:24612]
ENSG00000074416	-0.476974830097746	5.80471982642664e-06	MGLL	monoglyceride lipase [Source:HGNC Symbol;Acc:HGNC:17038]
ENSG00000074527	2.22496416502419	1.54337332458365e-13	NTN4	netrin 4 [Source:HGNC Symbol;Acc:HGNC:13658]
ENSG00000074590	-0.615452393251776	1.21598770103705e-05	NUAK1	NUAK family kinase 1 [Source:HGNC Symbol;Acc:HGNC:14311]
ENSG00000074660	-1.21448394813691	6.45988170313643e-05	SCARF1	scavenger receptor class F member 1 [Source:HGNC Symbol;Acc:HGNC:16820]
ENSG00000074696	-0.695140862756614	3.73855008055056e-07	HACD3	3-hydroxyacyl-CoA dehydratase 3 [Source:HGNC Symbol;Acc:HGNC:24175]
ENSG00000074755	-0.859880210130839	1.08589718854891e-05	ZZEF1	zinc finger ZZ-type and EF-hand domain containing 1 [Source:HGNC Symbol;Acc:HGNC:29027]
ENSG00000074935	1.61343757184966	6.30645338676026e-05	TUBE1	tubulin epsilon 1 [Source:HGNC Symbol;Acc:HGNC:20775]
ENSG00000075213	2.01649604427165	2.51107308596228e-24	SEMA3A	semaphorin 3A [Source:HGNC Symbol;Acc:HGNC:10723]
ENSG00000075240	-1.33007012805352	7.2464706691624e-05	GRAMD4	GRAM domain containing 4 [Source:HGNC Symbol;Acc:HGNC:29113]
ENSG00000075292	0.609400650303462	2.16176727557433e-05	ZNF638	zinc finger protein 638 [Source:HGNC Symbol;Acc:HGNC:17894]
ENSG00000075336	-0.755471112886267	9.67689936976501e-06	TIMM21	translocase of inner mitochondrial membrane 21 [Source:HGNC Symbol;Acc:HGNC:25010]
ENSG00000075399	0.524902829075536	1.89840387074971e-07	VPS9D1	VPS9 domain containing 1 [Source:HGNC Symbol;Acc:HGNC:13526]
ENSG00000075426	-0.58187902070997	0.000300672806293586	FOSL2	FOS like 2, AP-1 transcription factor subunit [Source:HGNC Symbol;Acc:HGNC:3798]
ENSG00000075618	-1.09169128747394	1.89353009514871e-17	FSCN1	fascin actin-bundling protein 1 [Source:HGNC Symbol;Acc:HGNC:11148]
ENSG00000075624	-0.526877333678485	8.67924564681085e-07	ACTB	actin beta [Source:HGNC Symbol;Acc:HGNC:132]
ENSG00000075643	0.962485116795542	0.000275059280008285	MOCOS	molybdenum cofactor sulfurase [Source:HGNC Symbol;Acc:HGNC:18234]
ENSG00000075651	1.04566254377081	9.39977336239966e-08	PLD1	phospholipase D1 [Source:HGNC Symbol;Acc:HGNC:9067]
ENSG00000075702	-0.529319618230644	1.17449459116905e-07	WDR62	WD repeat domain 62 [Source:HGNC Symbol;Acc:HGNC:24502]
ENSG00000075891	-1.56202869285572	3.07149107934445e-07	PAX2	paired box 2 [Source:HGNC Symbol;Acc:HGNC:8616]
ENSG00000076003	-0.954497053457684	3.77700697307997e-05	MCM6	minichromosome maintenance complex component 6 [Source:HGNC Symbol;Acc:HGNC:6949]
ENSG00000076201	-0.671569194074765	1.59347817844003e-06	PTPN23	protein tyrosine phosphatase non-receptor type 23 [Source:HGNC Symbol;Acc:HGNC:14406]
ENSG00000076248	-1.40963793382601	1.19905389182862e-14	UNG	uracil DNA glycosylase [Source:HGNC Symbol;Acc:HGNC:12572]
ENSG00000076321	0.449882677593824	0.000129995281818417	KLHL20	kelch like family member 20 [Source:HGNC Symbol;Acc:HGNC:25056]
ENSG00000076351	-1.84821262735046	2.78823721475189e-10	SLC46A1	solute carrier family 46 member 1 [Source:HGNC Symbol;Acc:HGNC:30521]
ENSG00000076356	-2.03260293676624	2.15735687213967e-16	PLXNA2	plexin A2 [Source:HGNC Symbol;Acc:HGNC:9100]
ENSG00000076513	-0.947896206494961	1.42751404454414e-17	ANKRD13A	ankyrin repeat domain 13A [Source:HGNC Symbol;Acc:HGNC:21268]
ENSG00000076706	-3.72358621772022	1.13338199939397e-253	MCAM	melanoma cell adhesion molecule [Source:HGNC Symbol;Acc:HGNC:6934]
ENSG00000076864	-1.22773553957126	3.17583639941741e-06	RAP1GAP	RAP1 GTPase activating protein [Source:HGNC Symbol;Acc:HGNC:9858]
ENSG00000076928	-0.744361786581323	6.31560892033797e-16	ARHGEF1	Rho guanine nucleotide exchange factor 1 [Source:HGNC Symbol;Acc:HGNC:681]
ENSG00000076944	0.414780308431023	9.36424042625087e-06	STXBP2	syntaxin binding protein 2 [Source:HGNC Symbol;Acc:HGNC:11445]
ENSG00000077147	-0.388215552161907	0.000953775636453905	TM9SF3	transmembrane 9 superfamily member 3 [Source:HGNC Symbol;Acc:HGNC:21529]
ENSG00000077150	0.524446536097874	1.20683491248195e-07	NFKB2	nuclear factor kappa B subunit 2 [Source:HGNC Symbol;Acc:HGNC:7795]
ENSG00000077232	0.740471160786674	2.84680217261816e-14	DNAJC10	DnaJ heat shock protein family (Hsp40) member C10 [Source:HGNC Symbol;Acc:HGNC:24637]
ENSG00000077254	0.642479800365638	1.19755869332383e-16	USP33	ubiquitin specific peptidase 33 [Source:HGNC Symbol;Acc:HGNC:20059]
ENSG00000077274	4.35906027177051	9.80621697043727e-13	CAPN6	calpain 6 [Source:HGNC Symbol;Acc:HGNC:1483]
ENSG00000077454	-0.483075604890845	0.000407430838166022	LRCH4	leucine rich repeats and calponin homology domain containing 4 [Source:HGNC Symbol;Acc:HGNC:6691]
ENSG00000077522	2.20494340590184	2.40793166669476e-06	ACTN2	actinin alpha 2 [Source:HGNC Symbol;Acc:HGNC:164]
ENSG00000077585	0.71491963714117	2.44861946195795e-06	GPR137B	G protein-coupled receptor 137B [Source:HGNC Symbol;Acc:HGNC:11862]
ENSG00000077684	-0.792255886779802	3.02124051255015e-20	JADE1	jade family PHD finger 1 [Source:HGNC Symbol;Acc:HGNC:30027]
ENSG00000077713	-0.625370006373195	8.24955457487664e-12	SLC25A43	solute carrier family 25 member 43 [Source:HGNC Symbol;Acc:HGNC:30557]
ENSG00000078043	-0.520906137062129	0.000191673171470264	PIAS2	protein inhibitor of activated STAT 2 [Source:HGNC Symbol;Acc:HGNC:17311]
ENSG00000078053	-2.82443318397608	8.69416638668472e-10	AMPH	amphiphysin [Source:HGNC Symbol;Acc:HGNC:471]
ENSG00000078061	-0.422490564418122	6.83360275226252e-05	ARAF	A-Raf proto-oncogene, serine/threonine kinase [Source:HGNC Symbol;Acc:HGNC:646]
ENSG00000078124	-0.821825323217667	2.19189825503667e-06	ACER3	alkaline ceramidase 3 [Source:HGNC Symbol;Acc:HGNC:16066]
ENSG00000078237	1.56417478835564	7.04612962381244e-09	TIGAR	TP53 induced glycolysis regulatory phosphatase [Source:HGNC Symbol;Acc:HGNC:1185]
ENSG00000078304	-0.468332085645199	2.69609959866504e-07	PPP2R5C	protein phosphatase 2 regulatory subunit B'gamma [Source:HGNC Symbol;Acc:HGNC:9311]
ENSG00000078399	-0.51423397149396	7.83356769468343e-05	HOXA9	homeobox A9 [Source:HGNC Symbol;Acc:HGNC:5109]
ENSG00000078401	-4.08961709633613	4.78600226541286e-166	EDN1	endothelin 1 [Source:HGNC Symbol;Acc:HGNC:3176]
ENSG00000078668	-0.660980960850334	9.78389982008517e-07	VDAC3	voltage dependent anion channel 3 [Source:HGNC Symbol;Acc:HGNC:12674]
ENSG00000078725	-4.49507668632302	6.32926419243269e-09	BRINP1	BMP/retinoic acid inducible neural specific 1 [Source:HGNC Symbol;Acc:HGNC:2687]
ENSG00000078900	-3.10858274789473	1.0083261393401e-05	TP73	tumor protein p73 [Source:HGNC Symbol;Acc:HGNC:12003]
ENSG00000079112	1.43695993687929	1.73676192741134e-07	CDH17	cadherin 17 [Source:HGNC Symbol;Acc:HGNC:1756]
ENSG00000079156	1.06655153322671	0.000654925233803416	OSBPL6	oxysterol binding protein like 6 [Source:HGNC Symbol;Acc:HGNC:16388]
ENSG00000079215	1.63858710995085	7.96066847651312e-16	SLC1A3	solute carrier family 1 member 3 [Source:HGNC Symbol;Acc:HGNC:10941]
ENSG00000079263	2.1932292547127	5.19849423479798e-59	SP140	SP140 nuclear body protein [Source:HGNC Symbol;Acc:HGNC:17133]
ENSG00000079308	-1.57644324839394	1.0632707774628e-08	TNS1	tensin 1 [Source:HGNC Symbol;Acc:HGNC:11973]
ENSG00000079337	2.01760941456882	2.12202159362353e-26	RAPGEF3	Rap guanine nucleotide exchange factor 3 [Source:HGNC Symbol;Acc:HGNC:16629]
ENSG00000079385	2.72118235250486	4.19209779528279e-07	CEACAM1	carcinoembryonic antigen related cell adhesion molecule 1 [Source:HGNC Symbol;Acc:HGNC:1814]
ENSG00000079432	-0.779882808570836	6.56627202778174e-05	CIC	capicua transcriptional repressor [Source:HGNC Symbol;Acc:HGNC:14214]
ENSG00000079462	-1.05283933673499	8.34711511924531e-09	PAFAH1B3	platelet activating factor acetylhydrolase 1b catalytic subunit 3 [Source:HGNC Symbol;Acc:HGNC:8576]
ENSG00000079616	-0.555862029727591	0.000143772997073152	KIF22	kinesin family member 22 [Source:HGNC Symbol;Acc:HGNC:6391]
ENSG00000079931	-0.960226757582679	3.68576052436348e-15	MOXD1	monooxygenase DBH like 1 [Source:HGNC Symbol;Acc:HGNC:21063]
ENSG00000079974	0.622180590081372	1.90126443240263e-05	RABL2B	RAB, member of RAS oncogene family like 2B [Source:HGNC Symbol;Acc:HGNC:9800]
ENSG00000080200	-0.448495734951529	3.38628751960876e-05	CRYBG3	crystallin beta-gamma domain containing 3 [Source:HGNC Symbol;Acc:HGNC:34427]
ENSG00000080546	0.580328180835486	0.000102500046985053	SESN1	sestrin 1 [Source:HGNC Symbol;Acc:HGNC:21595]
ENSG00000080815	-0.320202643241928	0.000376504249926272	PSEN1	presenilin 1 [Source:HGNC Symbol;Acc:HGNC:9508]
ENSG00000080824	-0.647418269154962	2.7613597251464e-10	HSP90AA1	heat shock protein 90 alpha family class A member 1 [Source:HGNC Symbol;Acc:HGNC:5253]
ENSG00000080839	-0.838666614109742	8.69834141151442e-05	RBL1	RB transcriptional corepressor like 1 [Source:HGNC Symbol;Acc:HGNC:9893]
ENSG00000080845	-0.453827587253187	4.12327061063819e-05	DLGAP4	DLG associated protein 4 [Source:HGNC Symbol;Acc:HGNC:24476]
ENSG00000081041	3.00616394829954	5.57213413003166e-12	CXCL2	C-X-C motif chemokine ligand 2 [Source:HGNC Symbol;Acc:HGNC:4603]
ENSG00000081051	1.7463795262734	0.000170766372553115	AFP	alpha fetoprotein [Source:HGNC Symbol;Acc:HGNC:317]
ENSG00000081052	1.4451853253323	2.3133376016082e-09	COL4A4	collagen type IV alpha 4 chain [Source:HGNC Symbol;Acc:HGNC:2206]
ENSG00000081177	-0.704412041542479	6.81719544718661e-05	EXD2	exonuclease 3'-5' domain containing 2 [Source:HGNC Symbol;Acc:HGNC:20217]
ENSG00000081181	1.92808505704588	1.77273818391166e-16	ARG2	arginase 2 [Source:HGNC Symbol;Acc:HGNC:664]
ENSG00000081665	0.478295647468425	0.000904178749940664	ZNF506	zinc finger protein 506 [Source:HGNC Symbol;Acc:HGNC:23780]
ENSG00000081913	-1.70305439107072	5.03928212285247e-09	PHLPP1	PH domain and leucine rich repeat protein phosphatase 1 [Source:HGNC Symbol;Acc:HGNC:20610]
ENSG00000081923	-3.01057660355108	2.87272218228527e-31	ATP8B1	ATPase phospholipid transporting 8B1 [Source:HGNC Symbol;Acc:HGNC:3706]
ENSG00000082014	-1.10936970918978	3.0767678762283e-14	SMARCD3	SWI/SNF related, matrix associated, actin dependent regulator of chromatin, subfamily d, member 3 [Source:HGNC Symbol;Acc:HGNC:11108]
ENSG00000082068	-0.458694665406364	0.000289035371743186	WDR70	WD repeat domain 70 [Source:HGNC Symbol;Acc:HGNC:25495]
ENSG00000082196	0.982107801486809	0.000924001878157961	C1QTNF3	C1q and TNF related 3 [Source:HGNC Symbol;Acc:HGNC:14326]
ENSG00000082458	2.04437328043576	0.000740506753753456	DLG3	discs large MAGUK scaffold protein 3 [Source:HGNC Symbol;Acc:HGNC:2902]
ENSG00000082497	-0.921698725759707	1.72736523546806e-07	SERTAD4	SERTA domain containing 4 [Source:HGNC Symbol;Acc:HGNC:25236]
ENSG00000082512	-1.41870458892251	6.95564211901214e-05	TRAF5	TNF receptor associated factor 5 [Source:HGNC Symbol;Acc:HGNC:12035]
ENSG00000082516	-0.733085587016491	2.25873259251977e-12	GEMIN5	gem nuclear organelle associated protein 5 [Source:HGNC Symbol;Acc:HGNC:20043]
ENSG00000082641	0.876071860413623	0.000783168162354085	NFE2L1	nuclear factor, erythroid 2 like 1 [Source:HGNC Symbol;Acc:HGNC:7781]
ENSG00000082684	-3.81368582701271	1.42789945757957e-09	SEMA5B	semaphorin 5B [Source:HGNC Symbol;Acc:HGNC:10737]
ENSG00000082781	-1.15794313550344	8.98356593731138e-15	ITGB5	integrin subunit beta 5 [Source:HGNC Symbol;Acc:HGNC:6160]
ENSG00000082898	-0.487068193224883	0.000481174895742369	XPO1	exportin 1 [Source:HGNC Symbol;Acc:HGNC:12825]
ENSG00000083093	0.444743469637601	0.000253211773964323	PALB2	partner and localizer of BRCA2 [Source:HGNC Symbol;Acc:HGNC:26144]
ENSG00000083123	0.453973360857806	6.06040936411652e-05	BCKDHB	branched chain keto acid dehydrogenase E1 subunit beta [Source:HGNC Symbol;Acc:HGNC:987]
ENSG00000083290	3.29920783978728	3.54431384646887e-19	ULK2	unc-51 like autophagy activating kinase 2 [Source:HGNC Symbol;Acc:HGNC:13480]
ENSG00000083457	-0.622091137171958	0.000160731947174467	ITGAE	integrin subunit alpha E [Source:HGNC Symbol;Acc:HGNC:6147]
ENSG00000083642	-0.752903020716029	8.09126868987619e-05	PDS5B	PDS5 cohesin associated factor B [Source:HGNC Symbol;Acc:HGNC:20418]
ENSG00000083799	1.10396901457974	4.64053152169025e-10	CYLD	CYLD lysine 63 deubiquitinase [Source:HGNC Symbol;Acc:HGNC:2584]
ENSG00000083807	1.25199532705762	0.000243448834051819	SLC27A5	solute carrier family 27 member 5 [Source:HGNC Symbol;Acc:HGNC:10999]
ENSG00000083812	-0.680500005053782	0.000593539053533479	ZNF324	zinc finger protein 324 [Source:HGNC Symbol;Acc:HGNC:14096]
ENSG00000083857	-0.984950202620287	2.58666882460421e-05	FAT1	FAT atypical cadherin 1 [Source:HGNC Symbol;Acc:HGNC:3595]
ENSG00000084072	0.894559452440691	5.71458954675563e-09	PPIE	peptidylprolyl isomerase E [Source:HGNC Symbol;Acc:HGNC:9258]
ENSG00000084453	2.33414551816073	5.81911414803397e-06	SLCO1A2	solute carrier organic anion transporter family member 1A2 [Source:HGNC Symbol;Acc:HGNC:10956]
ENSG00000084652	0.305901373261488	0.000648511166071177	TXLNA	taxilin alpha [Source:HGNC Symbol;Acc:HGNC:30685]
ENSG00000084710	1.84428373460669	7.1379309480153e-05	EFR3B	EFR3 homolog B [Source:HGNC Symbol;Acc:HGNC:29155]
ENSG00000084734	1.35494591012341	2.69014487745184e-08	GCKR	glucokinase regulator [Source:HGNC Symbol;Acc:HGNC:4196]
ENSG00000084764	0.588622558722645	0.000327956482025724	MAPRE3	microtubule associated protein RP/EB family member 3 [Source:HGNC Symbol;Acc:HGNC:6892]
ENSG00000085063	-0.677743873752746	1.83901037685849e-08	CD59	CD59 molecule (CD59 blood group) [Source:HGNC Symbol;Acc:HGNC:1689]
ENSG00000085377	-0.689373397058644	5.36922353813925e-11	PREP	prolyl endopeptidase [Source:HGNC Symbol;Acc:HGNC:9358]
ENSG00000085465	1.1217202127977	1.08341358095517e-10	OVGP1	oviductal glycoprotein 1 [Source:HGNC Symbol;Acc:HGNC:8524]
ENSG00000085491	-0.520491827850348	1.36754257564264e-07	SLC25A24	solute carrier family 25 member 24 [Source:HGNC Symbol;Acc:HGNC:20662]
ENSG00000085511	-0.690872371886675	0.00027712542654603	MAP3K4	mitogen-activated protein kinase kinase kinase 4 [Source:HGNC Symbol;Acc:HGNC:6856]
ENSG00000085563	0.768162084803588	4.62881503211304e-07	ABCB1	ATP binding cassette subfamily B member 1 [Source:HGNC Symbol;Acc:HGNC:40]
ENSG00000085662	0.753593551875047	3.17889329045605e-16	AKR1B1	aldo-keto reductase family 1 member B [Source:HGNC Symbol;Acc:HGNC:381]
ENSG00000085719	-0.566628508544221	0.000967178488804949	CPNE3	copine 3 [Source:HGNC Symbol;Acc:HGNC:2316]
ENSG00000085721	0.532460023002009	0.000947479836797154	RRN3	RRN3 homolog, RNA polymerase I transcription factor [Source:HGNC Symbol;Acc:HGNC:30346]
ENSG00000085831	1.81196212713248	1.78163181805764e-18	TTC39A	tetratricopeptide repeat domain 39A [Source:HGNC Symbol;Acc:HGNC:18657]
ENSG00000085840	-1.50479081025472	6.31874803154213e-05	ORC1	origin recognition complex subunit 1 [Source:HGNC Symbol;Acc:HGNC:8487]
ENSG00000085978	0.789267180759189	6.5198870937275e-13	ATG16L1	autophagy related 16 like 1 [Source:HGNC Symbol;Acc:HGNC:21498]
ENSG00000085982	0.491369058361889	0.000525108212211419	USP40	ubiquitin specific peptidase 40 [Source:HGNC Symbol;Acc:HGNC:20069]
ENSG00000085999	-0.741505208325378	0.000331292608374891	RAD54L	RAD54 like [Source:HGNC Symbol;Acc:HGNC:9826]
ENSG00000086015	-0.525145465036513	0.00019718809163911	MAST2	microtubule associated serine/threonine kinase 2 [Source:HGNC Symbol;Acc:HGNC:19035]
ENSG00000086061	-0.71941218680546	8.55767837931165e-07	DNAJA1	DnaJ heat shock protein family (Hsp40) member A1 [Source:HGNC Symbol;Acc:HGNC:5229]
ENSG00000086062	0.555883395797856	2.55045612233103e-09	B4GALT1	beta-1,4-galactosyltransferase 1 [Source:HGNC Symbol;Acc:HGNC:924]
ENSG00000086475	-0.375518806100488	4.13004363128186e-05	SEPHS1	selenophosphate synthetase 1 [Source:HGNC Symbol;Acc:HGNC:19685]
ENSG00000086570	2.46319534766514	2.70226576253595e-11	FAT2	FAT atypical cadherin 2 [Source:HGNC Symbol;Acc:HGNC:3596]
ENSG00000086598	-0.496642871440362	9.54006341142419e-09	TMED2	transmembrane p24 trafficking protein 2 [Source:HGNC Symbol;Acc:HGNC:16996]
ENSG00000086730	2.65353696562702	0.000109041956559648	LAT2	linker for activation of T cells family member 2 [Source:HGNC Symbol;Acc:HGNC:12749]
ENSG00000086827	-0.580942992409726	1.69963701325127e-05	ZW10	zw10 kinetochore protein [Source:HGNC Symbol;Acc:HGNC:13194]
ENSG00000087077	-0.647691689891101	2.71185324710675e-08	TRIP6	thyroid hormone receptor interactor 6 [Source:HGNC Symbol;Acc:HGNC:12311]
ENSG00000087087	-0.835613890936896	4.48042471953204e-08	SRRT	serrate, RNA effector molecule [Source:HGNC Symbol;Acc:HGNC:24101]
ENSG00000087116	0.921631569720829	7.1431111692558e-06	ADAMTS2	ADAM metallopeptidase with thrombospondin type 1 motif 2 [Source:HGNC Symbol;Acc:HGNC:218]
ENSG00000087157	0.541791935691567	2.67573122171962e-08	PGS1	phosphatidylglycerophosphate synthase 1 [Source:HGNC Symbol;Acc:HGNC:30029]
ENSG00000087245	-1.14654140339959	1.90277932609339e-16	MMP2	matrix metallopeptidase 2 [Source:HGNC Symbol;Acc:HGNC:7166]
ENSG00000087266	-0.828069951491202	3.83889927103973e-09	SH3BP2	SH3 domain binding protein 2 [Source:HGNC Symbol;Acc:HGNC:10825]
ENSG00000087274	-0.722185246400498	2.52068867314826e-08	ADD1	adducin 1 [Source:HGNC Symbol;Acc:HGNC:243]
ENSG00000087299	-0.811459440255301	4.89466271083776e-06	L2HGDH	L-2-hydroxyglutarate dehydrogenase [Source:HGNC Symbol;Acc:HGNC:20499]
ENSG00000087303	0.972851115099328	7.77592389962789e-06	NID2	nidogen 2 [Source:HGNC Symbol;Acc:HGNC:13389]
ENSG00000087365	-0.395815613573262	0.000903080264837267	SF3B2	splicing factor 3b subunit 2 [Source:HGNC Symbol;Acc:HGNC:10769]
ENSG00000087460	-0.699681423789307	1.91360358967043e-10	GNAS	GNAS complex locus [Source:HGNC Symbol;Acc:HGNC:4392]
ENSG00000087510	-2.27823849258928	0.000225294958887284	TFAP2C	transcription factor AP-2 gamma [Source:HGNC Symbol;Acc:HGNC:11744]
ENSG00000087589	2.1036953740348	1.64270749620407e-10	CASS4	Cas scaffold protein family member 4 [Source:HGNC Symbol;Acc:HGNC:15878]
ENSG00000087884	-0.604412358678885	0.000151964041785277	AAMDC	adipogenesis associated Mth938 domain containing [Source:HGNC Symbol;Acc:HGNC:30205]
ENSG00000087903	-0.95498071671219	6.26623314433673e-08	RFX2	regulatory factor X2 [Source:HGNC Symbol;Acc:HGNC:9983]
ENSG00000088038	-0.515603041469481	0.000283182197998543	CNOT3	CCR4-NOT transcription complex subunit 3 [Source:HGNC Symbol;Acc:HGNC:7879]
ENSG00000088247	-0.60187738889548	1.66442965739893e-05	KHSRP	KH-type splicing regulatory protein [Source:HGNC Symbol;Acc:HGNC:6316]
ENSG00000088256	-0.629613197049317	3.55003068921938e-06	GNA11	G protein subunit alpha 11 [Source:HGNC Symbol;Acc:HGNC:4379]
ENSG00000088280	1.03150568154173	1.64540041141938e-06	ASAP3	ArfGAP with SH3 domain, ankyrin repeat and PH domain 3 [Source:HGNC Symbol;Acc:HGNC:14987]
ENSG00000088305	2.54569155172915	1.40694617955509e-36	DNMT3B	DNA methyltransferase 3 beta [Source:HGNC Symbol;Acc:HGNC:2979]
ENSG00000088325	-0.726165282955433	1.88960830891681e-06	TPX2	TPX2 microtubule nucleation factor [Source:HGNC Symbol;Acc:HGNC:1249]
ENSG00000088340	-0.815672917636963	0.000757632807435465	FER1L4	fer-1 like family member 4 (pseudogene) [Source:HGNC Symbol;Acc:HGNC:15801]
ENSG00000088682	0.491209671238996	0.000286913239174381	COQ9	coenzyme Q9 [Source:HGNC Symbol;Acc:HGNC:25302]
ENSG00000088832	-0.502469667859427	9.55226289222075e-08	FKBP1A	FKBP prolyl isomerase 1A [Source:HGNC Symbol;Acc:HGNC:3711]
ENSG00000088888	-0.488922749005354	2.6652349513905e-05	MAVS	mitochondrial antiviral signaling protein [Source:HGNC Symbol;Acc:HGNC:29233]
ENSG00000088986	-0.632475029771453	1.79782856822581e-06	DYNLL1	dynein light chain LC8-type 1 [Source:HGNC Symbol;Acc:HGNC:15476]
ENSG00000088992	1.60127381855866	3.61535683691383e-13	TESC	tescalcin [Source:HGNC Symbol;Acc:HGNC:26065]
ENSG00000089041	2.30794780907654	0.000186170116048465	P2RX7	purinergic receptor P2X 7 [Source:HGNC Symbol;Acc:HGNC:8537]
ENSG00000089053	-0.397443110627768	4.02855404311317e-06	ANAPC5	anaphase promoting complex subunit 5 [Source:HGNC Symbol;Acc:HGNC:15713]
ENSG00000089060	-0.491352895153543	0.000104492708971626	SLC8B1	solute carrier family 8 member B1 [Source:HGNC Symbol;Acc:HGNC:26175]
ENSG00000089094	-0.718861611753509	0.000346555713926817	KDM2B	lysine demethylase 2B [Source:HGNC Symbol;Acc:HGNC:13610]
ENSG00000089127	2.24510130974716	4.53959473071122e-47	OAS1	2'-5'-oligoadenylate synthetase 1 [Source:HGNC Symbol;Acc:HGNC:8086]
ENSG00000089159	-1.17688773218891	3.55517349776738e-37	PXN	paxillin [Source:HGNC Symbol;Acc:HGNC:9718]
ENSG00000089597	-0.455041064730343	5.554427252931e-08	GANAB	glucosidase II alpha subunit [Source:HGNC Symbol;Acc:HGNC:4138]
ENSG00000089737	-0.680800664745955	1.38905670076194e-10	DDX24	DEAD-box helicase 24 [Source:HGNC Symbol;Acc:HGNC:13266]
ENSG00000089775	-0.523128491855053	8.60354110257942e-06	ZBTB25	zinc finger and BTB domain containing 25 [Source:HGNC Symbol;Acc:HGNC:13112]
ENSG00000089818	0.821336003227009	0.000215867131114571	NECAP1	NECAP endocytosis associated 1 [Source:HGNC Symbol;Acc:HGNC:24539]
ENSG00000089847	2.27288456234812	1.02703590572267e-05	ANKRD24	ankyrin repeat domain 24 [Source:HGNC Symbol;Acc:HGNC:29424]
ENSG00000089902	-0.579487451015893	7.33206430906466e-07	RCOR1	REST corepressor 1 [Source:HGNC Symbol;Acc:HGNC:17441]
ENSG00000090020	1.20425693308024	0.000441828685817695	SLC9A1	solute carrier family 9 member A1 [Source:HGNC Symbol;Acc:HGNC:11071]
ENSG00000090060	-0.454256650932574	4.20210749429974e-05	PAPOLA	poly(A) polymerase alpha [Source:HGNC Symbol;Acc:HGNC:14981]
ENSG00000090061	-0.744626071273292	3.24689252054019e-08	CCNK	cyclin K [Source:HGNC Symbol;Acc:HGNC:1596]
ENSG00000090097	-0.667394484206878	6.50976722417619e-11	PCBP4	poly(rC) binding protein 4 [Source:HGNC Symbol;Acc:HGNC:8652]
ENSG00000090238	1.13580287564527	1.28245565345757e-07	YPEL3	yippee like 3 [Source:HGNC Symbol;Acc:HGNC:18327]
ENSG00000090316	-0.693105503741873	5.67572268686246e-09	MAEA	macrophage erythroblast attacher [Source:HGNC Symbol;Acc:HGNC:13731]
ENSG00000090339	0.527720251768757	1.97768503995849e-08	ICAM1	intercellular adhesion molecule 1 [Source:HGNC Symbol;Acc:HGNC:5344]
ENSG00000090372	-0.362925352748049	0.000659478879076225	STRN4	striatin 4 [Source:HGNC Symbol;Acc:HGNC:15721]
ENSG00000090470	-0.483114733819372	0.000735611407686957	PDCD7	programmed cell death 7 [Source:HGNC Symbol;Acc:HGNC:8767]
ENSG00000090565	-0.669040749720117	4.72905237780409e-05	RAB11FIP3	RAB11 family interacting protein 3 [Source:HGNC Symbol;Acc:HGNC:17224]
ENSG00000090659	3.54999759941272	1.71704526971731e-18	CD209	CD209 molecule [Source:HGNC Symbol;Acc:HGNC:1641]
ENSG00000090674	0.427939005165923	0.000480400913329629	MCOLN1	mucolipin 1 [Source:HGNC Symbol;Acc:HGNC:13356]
ENSG00000090776	-0.852654694342975	1.09300781263618e-05	EFNB1	ephrin B1 [Source:HGNC Symbol;Acc:HGNC:3226]
ENSG00000090861	1.31272758628587	1.48160144166797e-08	AARS	alanyl-tRNA synthetase [Source:HGNC Symbol;Acc:HGNC:20]
ENSG00000090889	-0.588574536283149	0.000189586097311902	KIF4A	kinesin family member 4A [Source:HGNC Symbol;Acc:HGNC:13339]
ENSG00000090924	-0.978305363563339	2.09590818522639e-06	PLEKHG2	pleckstrin homology and RhoGEF domain containing G2 [Source:HGNC Symbol;Acc:HGNC:29515]
ENSG00000090975	-1.807560310168	1.23002322904504e-08	PITPNM2	phosphatidylinositol transfer protein membrane associated 2 [Source:HGNC Symbol;Acc:HGNC:21044]
ENSG00000091129	2.10523157517806	7.11460008968449e-14	NRCAM	neuronal cell adhesion molecule [Source:HGNC Symbol;Acc:HGNC:7994]
ENSG00000091140	0.480657662284787	0.000473986880791736	DLD	dihydrolipoamide dehydrogenase [Source:HGNC Symbol;Acc:HGNC:2898]
ENSG00000091317	-0.361036050970262	0.000639738295897795	CMTM6	CKLF like MARVEL transmembrane domain containing 6 [Source:HGNC Symbol;Acc:HGNC:19177]
ENSG00000091409	-0.879031216373181	7.43003349627032e-16	ITGA6	integrin subunit alpha 6 [Source:HGNC Symbol;Acc:HGNC:6142]
ENSG00000091490	0.896781043387017	4.43287195181018e-12	SEL1L3	SEL1L family member 3 [Source:HGNC Symbol;Acc:HGNC:29108]
ENSG00000091542	-0.4624885585402	9.02210540484342e-05	ALKBH5	alkB homolog 5, RNA demethylase [Source:HGNC Symbol;Acc:HGNC:25996]
ENSG00000092036	-0.632054273565828	7.5876731195959e-08	HAUS4	HAUS augmin like complex subunit 4 [Source:HGNC Symbol;Acc:HGNC:20163]
ENSG00000092094	-0.591180103051102	0.000125337903574692	OSGEP	O-sialoglycoprotein endopeptidase [Source:HGNC Symbol;Acc:HGNC:18028]
ENSG00000092140	-0.685910651571974	9.370635252201e-05	G2E3	G2/M-phase specific E3 ubiquitin protein ligase [Source:HGNC Symbol;Acc:HGNC:20338]
ENSG00000092148	-0.393796362270782	0.000920308449111907	HECTD1	HECT domain E3 ubiquitin protein ligase 1 [Source:HGNC Symbol;Acc:HGNC:20157]
ENSG00000092201	-0.700364721665076	2.38703210414792e-14	SUPT16H	SPT16 homolog, facilitates chromatin remodeling subunit [Source:HGNC Symbol;Acc:HGNC:11465]
ENSG00000092203	-0.667408522404341	3.29388811358463e-05	TOX4	TOX high mobility group box family member 4 [Source:HGNC Symbol;Acc:HGNC:20161]
ENSG00000092421	-3.157327460707	1.7803729207774e-06	SEMA6A	semaphorin 6A [Source:HGNC Symbol;Acc:HGNC:10738]
ENSG00000092470	-1.40248185618493	4.62061425925545e-08	WDR76	WD repeat domain 76 [Source:HGNC Symbol;Acc:HGNC:25773]
ENSG00000092820	-0.998138983927508	1.80688028689876e-06	EZR	ezrin [Source:HGNC Symbol;Acc:HGNC:12691]
ENSG00000092853	-0.972431055705504	4.00186187543473e-05	CLSPN	claspin [Source:HGNC Symbol;Acc:HGNC:19715]
ENSG00000092929	2.35248241863611	4.75040452666508e-07	UNC13D	unc-13 homolog D [Source:HGNC Symbol;Acc:HGNC:23147]
ENSG00000092931	0.701722812832934	7.3035123036285e-11	MFSD11	major facilitator superfamily domain containing 11 [Source:HGNC Symbol;Acc:HGNC:25458]
ENSG00000092964	-0.848172134817394	9.95820208266833e-06	DPYSL2	dihydropyrimidinase like 2 [Source:HGNC Symbol;Acc:HGNC:3014]
ENSG00000092978	0.698209445557204	9.12197205945839e-09	GPATCH2	G-patch domain containing 2 [Source:HGNC Symbol;Acc:HGNC:25499]
ENSG00000093183	-0.437958005209598	1.31726256499234e-06	SEC22C	SEC22 homolog C, vesicle trafficking protein [Source:HGNC Symbol;Acc:HGNC:16828]
ENSG00000093217	-0.773749932463392	1.3648660186369e-05	XYLB	xylulokinase [Source:HGNC Symbol;Acc:HGNC:12839]
ENSG00000094796	8.2191695699455	7.57252732232953e-78	KRT31	keratin 31 [Source:HGNC Symbol;Acc:HGNC:6448]
ENSG00000094804	-0.7558870985342	0.00018421943217849	CDC6	cell division cycle 6 [Source:HGNC Symbol;Acc:HGNC:1744]
ENSG00000095002	-0.890548292239182	0.000134521010461923	MSH2	mutS homolog 2 [Source:HGNC Symbol;Acc:HGNC:7325]
ENSG00000095203	1.30139300018172	2.77091670618273e-10	EPB41L4B	erythrocyte membrane protein band 4.1 like 4B [Source:HGNC Symbol;Acc:HGNC:19818]
ENSG00000095303	-2.56149631594369	2.93707428453671e-29	PTGS1	prostaglandin-endoperoxide synthase 1 [Source:HGNC Symbol;Acc:HGNC:9604]
ENSG00000095319	-0.714809217150654	0.000101284649628045	NUP188	nucleoporin 188 [Source:HGNC Symbol;Acc:HGNC:17859]
ENSG00000095321	-0.575915354122274	0.000506556281264952	CRAT	carnitine O-acetyltransferase [Source:HGNC Symbol;Acc:HGNC:2342]
ENSG00000095397	1.06848633942205	0.000569997143786154	WHRN	whirlin [Source:HGNC Symbol;Acc:HGNC:16361]
ENSG00000095485	-0.34952463369151	0.000751182667960585	CWF19L1	CWF19 like cell cycle control factor 1 [Source:HGNC Symbol;Acc:HGNC:25613]
ENSG00000095587	0.480371844346986	5.44752182914043e-05	TLL2	tolloid like 2 [Source:HGNC Symbol;Acc:HGNC:11844]
ENSG00000095637	-3.22271590969179	1.18864406933804e-06	SORBS1	sorbin and SH3 domain containing 1 [Source:HGNC Symbol;Acc:HGNC:14565]
ENSG00000095752	-1.40231888131208	0.000984269727800911	IL11	interleukin 11 [Source:HGNC Symbol;Acc:HGNC:5966]
ENSG00000095951	0.656295096464062	0.000720686504200898	HIVEP1	human immunodeficiency virus type I enhancer binding protein 1 [Source:HGNC Symbol;Acc:HGNC:4920]
ENSG00000096060	-0.957301761131847	1.39520995145158e-22	FKBP5	FKBP prolyl isomerase 5 [Source:HGNC Symbol;Acc:HGNC:3721]
ENSG00000096384	-0.895727670922875	9.6754801760975e-12	HSP90AB1	heat shock protein 90 alpha family class B member 1 [Source:HGNC Symbol;Acc:HGNC:5258]
ENSG00000096401	-0.398927124947058	0.000433318471813141	CDC5L	cell division cycle 5 like [Source:HGNC Symbol;Acc:HGNC:1743]
ENSG00000096433	-0.885655803418827	9.28125872755125e-06	ITPR3	inositol 1,4,5-trisphosphate receptor type 3 [Source:HGNC Symbol;Acc:HGNC:6182]
ENSG00000097033	0.384426601334537	0.000690300189195717	SH3GLB1	SH3 domain containing GRB2 like, endophilin B1 [Source:HGNC Symbol;Acc:HGNC:10833]
ENSG00000099194	-1.39565932097286	1.61191670450611e-17	SCD	stearoyl-CoA desaturase [Source:HGNC Symbol;Acc:HGNC:10571]
ENSG00000099219	-0.846975296381158	7.35797145076406e-11	ERMP1	endoplasmic reticulum metallopeptidase 1 [Source:HGNC Symbol;Acc:HGNC:23703]
ENSG00000099250	0.48740761934082	0.000343276812186342	NRP1	neuropilin 1 [Source:HGNC Symbol;Acc:HGNC:8004]
ENSG00000099282	0.939394489821971	1.62820576111609e-05	TSPAN15	tetraspanin 15 [Source:HGNC Symbol;Acc:HGNC:23298]
ENSG00000099331	-0.696819351824755	4.39662200517792e-06	MYO9B	myosin IXB [Source:HGNC Symbol;Acc:HGNC:7609]
ENSG00000099365	1.51306529118644	3.70246406884645e-08	STX1B	syntaxin 1B [Source:HGNC Symbol;Acc:HGNC:18539]
ENSG00000099377	-2.15720616934177	2.38137133584515e-12	HSD3B7	hydroxy-delta-5-steroid dehydrogenase, 3 beta- and steroid delta-isomerase 7 [Source:HGNC Symbol;Acc:HGNC:18324]
ENSG00000099385	-0.577649488277138	0.000120747949439346	BCL7C	BAF chromatin remodeling complex subunit BCL7C [Source:HGNC Symbol;Acc:HGNC:1006]
ENSG00000099810	-0.626441544054272	1.3840222961286e-09	MTAP	methylthioadenosine phosphorylase [Source:HGNC Symbol;Acc:HGNC:7413]
ENSG00000099812	2.86120215257566	2.57469956171494e-06	MISP	mitotic spindle positioning [Source:HGNC Symbol;Acc:HGNC:27000]
ENSG00000099814	-0.670564562654958	4.39038955284347e-08	CEP170B	centrosomal protein 170B [Source:HGNC Symbol;Acc:HGNC:20362]
ENSG00000099817	-0.317507320969744	0.000201278093467601	POLR2E	RNA polymerase II subunit E [Source:HGNC Symbol;Acc:HGNC:9192]
ENSG00000099849	-1.3916749625587	2.71301362776401e-10	RASSF7	Ras association domain family member 7 [Source:HGNC Symbol;Acc:HGNC:1166]
ENSG00000099904	-0.895924602125877	1.23148819843805e-13	ZDHHC8	zinc finger DHHC-type containing 8 [Source:HGNC Symbol;Acc:HGNC:18474]
ENSG00000099917	-0.529071509509423	9.00885686571123e-06	MED15	mediator complex subunit 15 [Source:HGNC Symbol;Acc:HGNC:14248]
ENSG00000099953	2.09050740735024	0.000796657073996423	MMP11	matrix metallopeptidase 11 [Source:HGNC Symbol;Acc:HGNC:7157]
ENSG00000099954	3.4447600186215	0.000226489403767964	CECR2	CECR2 histone acetyl-lysine reader [Source:HGNC Symbol;Acc:HGNC:1840]
ENSG00000099957	2.1762310798266	1.08397279434892e-07	P2RX6	purinergic receptor P2X 6 [Source:HGNC Symbol;Acc:HGNC:8538]
ENSG00000099968	0.965200268638315	6.22033234496397e-19	BCL2L13	BCL2 like 13 [Source:HGNC Symbol;Acc:HGNC:17164]
ENSG00000100031	0.55878304866828	3.46300805284835e-05	GGT1	gamma-glutamyltransferase 1 [Source:HGNC Symbol;Acc:HGNC:4250]
ENSG00000100033	-1.29493675064604	0.00068613889281729	PRODH	proline dehydrogenase 1 [Source:HGNC Symbol;Acc:HGNC:9453]
ENSG00000100036	-0.633686175045079	0.000121913720870142	SLC35E4	solute carrier family 35 member E4 [Source:HGNC Symbol;Acc:HGNC:17058]
ENSG00000100058	0.839417769172567	8.33332926017185e-07	CRYBB2P1	crystallin beta B2 pseudogene 1 [Source:HGNC Symbol;Acc:HGNC:2399]
ENSG00000100065	-1.57719653458988	6.7297582620559e-07	CARD10	caspase recruitment domain family member 10 [Source:HGNC Symbol;Acc:HGNC:16422]
ENSG00000100068	1.25262563313137	1.76320068112548e-06	LRP5L	LDL receptor related protein 5 like [Source:HGNC Symbol;Acc:HGNC:25323]
ENSG00000100075	-0.609193369569882	0.000284927692126424	SLC25A1	solute carrier family 25 member 1 [Source:HGNC Symbol;Acc:HGNC:10979]
ENSG00000100077	2.8131024619067	2.27415247092212e-25	GRK3	G protein-coupled receptor kinase 3 [Source:HGNC Symbol;Acc:HGNC:290]
ENSG00000100100	1.8637152381255	2.02854368417243e-14	PIK3IP1	phosphoinositide-3-kinase interacting protein 1 [Source:HGNC Symbol;Acc:HGNC:24942]
ENSG00000100106	-0.618592717658638	1.12869560229256e-11	TRIOBP	TRIO and F-actin binding protein [Source:HGNC Symbol;Acc:HGNC:17009]
ENSG00000100154	0.80125637386874	5.95978244546609e-08	TTC28	tetratricopeptide repeat domain 28 [Source:HGNC Symbol;Acc:HGNC:29179]
ENSG00000100218	1.44745930657352	0.000970255363861497	RSPH14	radial spoke head 14 homolog [Source:HGNC Symbol;Acc:HGNC:13437]
ENSG00000100219	1.34778132472753	1.49890399212871e-10	XBP1	X-box binding protein 1 [Source:HGNC Symbol;Acc:HGNC:12801]
ENSG00000100242	-0.661093428425076	2.58349688164813e-08	SUN2	Sad1 and UNC84 domain containing 2 [Source:HGNC Symbol;Acc:HGNC:14210]
ENSG00000100246	0.598290054717891	0.000835243431212327	DNAL4	dynein axonemal light chain 4 [Source:HGNC Symbol;Acc:HGNC:2955]
ENSG00000100253	2.64093365439126	4.53959473071122e-47	MIOX	myo-inositol oxygenase [Source:HGNC Symbol;Acc:HGNC:14522]
ENSG00000100258	-0.46026975970232	4.30498857857755e-05	LMF2	lipase maturation factor 2 [Source:HGNC Symbol;Acc:HGNC:25096]
ENSG00000100263	0.494950594817525	0.000825222685550541	RHBDD3	rhomboid domain containing 3 [Source:HGNC Symbol;Acc:HGNC:1308]
ENSG00000100284	0.887944056547586	1.20470960351233e-09	TOM1	target of myb1 membrane trafficking protein [Source:HGNC Symbol;Acc:HGNC:11982]
ENSG00000100290	2.74395327527593	0.000552075758210315	BIK	BCL2 interacting killer [Source:HGNC Symbol;Acc:HGNC:1051]
ENSG00000100296	0.629696954785642	2.74279641012423e-05	THOC5	THO complex 5 [Source:HGNC Symbol;Acc:HGNC:19074]
ENSG00000100297	-0.946610823275488	0.000181846781704599	MCM5	minichromosome maintenance complex component 5 [Source:HGNC Symbol;Acc:HGNC:6948]
ENSG00000100311	-6.56778054306048	2.58264923599581e-117	PDGFB	platelet derived growth factor subunit B [Source:HGNC Symbol;Acc:HGNC:8800]
ENSG00000100336	-1.77548321632368	1.25994349200168e-14	APOL4	apolipoprotein L4 [Source:HGNC Symbol;Acc:HGNC:14867]
ENSG00000100342	-2.16484505274121	5.58783697845199e-23	APOL1	apolipoprotein L1 [Source:HGNC Symbol;Acc:HGNC:618]
ENSG00000100345	-1.177612986396	1.88981856292395e-23	MYH9	myosin heavy chain 9 [Source:HGNC Symbol;Acc:HGNC:7579]
ENSG00000100350	4.15639762775767	2.39848915127019e-113	FOXRED2	FAD dependent oxidoreductase domain containing 2 [Source:HGNC Symbol;Acc:HGNC:26264]
ENSG00000100360	0.965466713200276	5.58852345933669e-12	IFT27	intraflagellar transport 27 [Source:HGNC Symbol;Acc:HGNC:18626]
ENSG00000100395	0.362974775207813	0.000470608315412782	L3MBTL2	L3MBTL histone methyl-lysine binding protein 2 [Source:HGNC Symbol;Acc:HGNC:18594]
ENSG00000100418	0.963574515419334	2.06905125873222e-05	DESI1	desumoylating isopeptidase 1 [Source:HGNC Symbol;Acc:HGNC:24577]
ENSG00000100422	-0.94802919793459	8.93148518668047e-05	CERK	ceramide kinase [Source:HGNC Symbol;Acc:HGNC:19256]
ENSG00000100441	-0.417701932267733	0.00014394107287213	KHNYN	KH and NYN domain containing [Source:HGNC Symbol;Acc:HGNC:20166]
ENSG00000100442	-0.476541071068871	0.000322581126739596	FKBP3	FKBP prolyl isomerase 3 [Source:HGNC Symbol;Acc:HGNC:3719]
ENSG00000100445	-0.438778691610434	0.000481838507306863	SDR39U1	short chain dehydrogenase/reductase family 39U member 1 [Source:HGNC Symbol;Acc:HGNC:20275]
ENSG00000100461	-0.902924743145488	7.8391686124639e-07	RBM23	RNA binding motif protein 23 [Source:HGNC Symbol;Acc:HGNC:20155]
ENSG00000100462	-0.51187148517405	0.000234741642711854	PRMT5	protein arginine methyltransferase 5 [Source:HGNC Symbol;Acc:HGNC:10894]
ENSG00000100473	-2.57122207196299	9.06114181357254e-12	COCH	cochlin [Source:HGNC Symbol;Acc:HGNC:2180]
ENSG00000100479	-0.969118198665836	2.7018196077125e-08	POLE2	DNA polymerase epsilon 2, accessory subunit [Source:HGNC Symbol;Acc:HGNC:9178]
ENSG00000100490	-0.853221861935023	0.000139368570005023	CDKL1	cyclin dependent kinase like 1 [Source:HGNC Symbol;Acc:HGNC:1781]
ENSG00000100503	-1.12896035441992	3.33747878983158e-14	NIN	ninein [Source:HGNC Symbol;Acc:HGNC:14906]
ENSG00000100504	-0.693833616183052	1.5362954005486e-12	PYGL	glycogen phosphorylase L [Source:HGNC Symbol;Acc:HGNC:9725]
ENSG00000100526	-0.764710247883133	5.98845989210244e-10	CDKN3	cyclin dependent kinase inhibitor 3 [Source:HGNC Symbol;Acc:HGNC:1791]
ENSG00000100558	-0.973040175053637	3.7276437461491e-13	PLEK2	pleckstrin 2 [Source:HGNC Symbol;Acc:HGNC:19238]
ENSG00000100568	-0.738615502245816	1.38167004317212e-10	VTI1B	vesicle transport through interaction with t-SNAREs 1B [Source:HGNC Symbol;Acc:HGNC:17793]
ENSG00000100580	-0.559104170198931	6.74115415403178e-05	TMED8	transmembrane p24 trafficking protein family member 8 [Source:HGNC Symbol;Acc:HGNC:18633]
ENSG00000100591	-0.911770282938181	1.8655290088593e-10	AHSA1	activator of HSP90 ATPase activity 1 [Source:HGNC Symbol;Acc:HGNC:1189]
ENSG00000100596	-1.09461265145465	2.28505677963249e-12	SPTLC2	serine palmitoyltransferase long chain base subunit 2 [Source:HGNC Symbol;Acc:HGNC:11278]
ENSG00000100599	-1.03540818310103	1.84420739672972e-17	RIN3	Ras and Rab interactor 3 [Source:HGNC Symbol;Acc:HGNC:18751]
ENSG00000100605	-0.990739338380826	1.21584873737535e-11	ITPK1	inositol-tetrakisphosphate 1-kinase [Source:HGNC Symbol;Acc:HGNC:6177]
ENSG00000100629	-0.694704089742561	3.13081719641105e-09	CEP128	centrosomal protein 128 [Source:HGNC Symbol;Acc:HGNC:20359]
ENSG00000100632	-0.669047425666314	1.25235564447086e-08	ERH	ERH mRNA splicing and mitosis factor [Source:HGNC Symbol;Acc:HGNC:3447]
ENSG00000100697	-0.58941669344279	0.000924683465072926	DICER1	dicer 1, ribonuclease III [Source:HGNC Symbol;Acc:HGNC:17098]
ENSG00000100711	-1.37267865499556	1.72479290437444e-25	ZFYVE21	zinc finger FYVE-type containing 21 [Source:HGNC Symbol;Acc:HGNC:20760]
ENSG00000100714	-0.737406518313716	3.92909544681567e-17	MTHFD1	methylenetetrahydrofolate dehydrogenase, cyclohydrolase and formyltetrahydrofolate synthetase 1 [Source:HGNC Symbol;Acc:HGNC:7432]
ENSG00000100722	-0.480896334077965	3.98761225961916e-05	ZC3H14	zinc finger CCCH-type containing 14 [Source:HGNC Symbol;Acc:HGNC:20509]
ENSG00000100726	-0.947552144409545	2.82788001578787e-14	TELO2	telomere maintenance 2 [Source:HGNC Symbol;Acc:HGNC:29099]
ENSG00000100749	-0.406048802946134	0.000450321009729104	VRK1	VRK serine/threonine kinase 1 [Source:HGNC Symbol;Acc:HGNC:12718]
ENSG00000100784	-0.644652651706627	5.94079814961402e-05	RPS6KA5	ribosomal protein S6 kinase A5 [Source:HGNC Symbol;Acc:HGNC:10434]
ENSG00000100802	-0.51669071265751	0.000752772348390382	C14orf93	chromosome 14 open reading frame 93 [Source:HGNC Symbol;Acc:HGNC:20162]
ENSG00000100811	-0.510061880327586	6.67927191835103e-07	YY1	YY1 transcription factor [Source:HGNC Symbol;Acc:HGNC:12856]
ENSG00000100823	-0.661925722630278	3.98828510797392e-09	APEX1	apurinic/apyrimidinic endodeoxyribonuclease 1 [Source:HGNC Symbol;Acc:HGNC:587]
ENSG00000100836	-0.561695864156785	4.7458394012805e-05	PABPN1	poly(A) binding protein nuclear 1 [Source:HGNC Symbol;Acc:HGNC:8565]
ENSG00000100852	-0.567961186617278	0.000326987529648772	ARHGAP5	Rho GTPase activating protein 5 [Source:HGNC Symbol;Acc:HGNC:675]
ENSG00000100865	-0.494165525607593	0.000438117897555471	CINP	cyclin dependent kinase 2 interacting protein [Source:HGNC Symbol;Acc:HGNC:23789]
ENSG00000100883	-0.420566011008723	2.37999410744632e-05	SRP54	signal recognition particle 54 [Source:HGNC Symbol;Acc:HGNC:11301]
ENSG00000100888	-0.541509865015901	4.04906058190478e-07	CHD8	chromodomain helicase DNA binding protein 8 [Source:HGNC Symbol;Acc:HGNC:20153]
ENSG00000100890	-0.55449671003244	4.82309582409628e-07	PRORP	protein only RNase P catalytic subunit [Source:HGNC Symbol;Acc:HGNC:19958]
ENSG00000100908	-0.454122492726364	0.000180920924768856	EMC9	ER membrane protein complex subunit 9 [Source:HGNC Symbol;Acc:HGNC:20273]
ENSG00000100916	-0.844966120540417	4.72804204271026e-07	BRMS1L	BRMS1 like transcriptional repressor [Source:HGNC Symbol;Acc:HGNC:20512]
ENSG00000100926	-0.542787798226762	2.35753395630199e-11	TM9SF1	transmembrane 9 superfamily member 1 [Source:HGNC Symbol;Acc:HGNC:11864]
ENSG00000100934	-0.87434422878079	1.25344514925231e-06	SEC23A	Sec23 homolog A, coat complex II component [Source:HGNC Symbol;Acc:HGNC:10701]
ENSG00000100979	2.38276100553886	5.11939886429597e-10	PLTP	phospholipid transfer protein [Source:HGNC Symbol;Acc:HGNC:9093]
ENSG00000100982	-0.66205936197995	1.40730821844202e-07	PCIF1	PDX1 C-terminal inhibiting factor 1 [Source:HGNC Symbol;Acc:HGNC:16200]
ENSG00000100994	1.04692106339388	4.53758274955724e-08	PYGB	glycogen phosphorylase B [Source:HGNC Symbol;Acc:HGNC:9723]
ENSG00000100997	-0.522852490054439	3.33421893840671e-05	ABHD12	abhydrolase domain containing 12 [Source:HGNC Symbol;Acc:HGNC:15868]
ENSG00000101003	-0.965833048510628	2.42591515364836e-08	GINS1	GINS complex subunit 1 [Source:HGNC Symbol;Acc:HGNC:28980]
ENSG00000101017	-0.65063015801717	0.000398304145859885	CD40	CD40 molecule [Source:HGNC Symbol;Acc:HGNC:11919]
ENSG00000101057	-0.739191765857605	2.22574238933869e-08	MYBL2	MYB proto-oncogene like 2 [Source:HGNC Symbol;Acc:HGNC:7548]
ENSG00000101104	2.07622636504093	0.000189334535286701	PABPC1L	poly(A) binding protein cytoplasmic 1 like [Source:HGNC Symbol;Acc:HGNC:15797]
ENSG00000101150	-0.516655155747563	7.82156611642498e-09	TPD52L2	TPD52 like 2 [Source:HGNC Symbol;Acc:HGNC:12007]
ENSG00000101161	-0.356211004961904	0.000209987319731764	PRPF6	pre-mRNA processing factor 6 [Source:HGNC Symbol;Acc:HGNC:15860]
ENSG00000101187	-2.13658126894304	6.96958787405231e-15	SLCO4A1	solute carrier organic anion transporter family member 4A1 [Source:HGNC Symbol;Acc:HGNC:10953]
ENSG00000101189	-0.658296888569727	3.40428542618908e-09	MRGBP	MRG domain binding protein [Source:HGNC Symbol;Acc:HGNC:15866]
ENSG00000101191	-0.67810873640243	1.05070263332818e-08	DIDO1	death inducer-obliterator 1 [Source:HGNC Symbol;Acc:HGNC:2680]
ENSG00000101193	-0.545029987643898	2.95626685034604e-10	GID8	GID complex subunit 8 homolog [Source:HGNC Symbol;Acc:HGNC:15857]
ENSG00000101194	-1.01695545505277	2.15204422591996e-11	SLC17A9	solute carrier family 17 member 9 [Source:HGNC Symbol;Acc:HGNC:16192]
ENSG00000101216	-0.443238766678059	7.05107479504532e-07	GMEB2	glucocorticoid modulatory element binding protein 2 [Source:HGNC Symbol;Acc:HGNC:4371]
ENSG00000101220	-0.767359554443787	1.11704961644152e-08	C20orf27	chromosome 20 open reading frame 27 [Source:HGNC Symbol;Acc:HGNC:15873]
ENSG00000101236	-1.13266204753419	5.78843362906027e-07	RNF24	ring finger protein 24 [Source:HGNC Symbol;Acc:HGNC:13779]
ENSG00000101246	-0.755554610653872	2.89400224515522e-10	ARFRP1	ADP ribosylation factor related protein 1 [Source:HGNC Symbol;Acc:HGNC:662]
ENSG00000101265	-0.773747943867859	0.00061181263073331	RASSF2	Ras association domain family member 2 [Source:HGNC Symbol;Acc:HGNC:9883]
ENSG00000101290	-0.502608967571438	0.000347218852928766	CDS2	CDP-diacylglycerol synthase 2 [Source:HGNC Symbol;Acc:HGNC:1801]
ENSG00000101335	-0.756971887114795	4.16082752375578e-07	MYL9	myosin light chain 9 [Source:HGNC Symbol;Acc:HGNC:15754]
ENSG00000101346	-0.678083857956885	1.23115385973546e-19	POFUT1	protein O-fucosyltransferase 1 [Source:HGNC Symbol;Acc:HGNC:14988]
ENSG00000101361	-0.382468236361178	8.05223600475045e-05	NOP56	NOP56 ribonucleoprotein [Source:HGNC Symbol;Acc:HGNC:15911]
ENSG00000101363	-0.322571983990104	8.84493689923055e-05	MANBAL	mannosidase beta like [Source:HGNC Symbol;Acc:HGNC:15799]
ENSG00000101367	-0.438087506737196	1.93848264499237e-06	MAPRE1	microtubule associated protein RP/EB family member 1 [Source:HGNC Symbol;Acc:HGNC:6890]
ENSG00000101384	1.98415402585409	1.05214391923774e-96	JAG1	jagged canonical Notch ligand 1 [Source:HGNC Symbol;Acc:HGNC:6188]
ENSG00000101400	-0.600051805473681	0.000716153940797109	SNTA1	syntrophin alpha 1 [Source:HGNC Symbol;Acc:HGNC:11167]
ENSG00000101412	-1.40193444593296	2.26381925112331e-11	E2F1	E2F transcription factor 1 [Source:HGNC Symbol;Acc:HGNC:3113]
ENSG00000101442	-0.428464285752974	0.000158133910973701	ACTR5	actin related protein 5 [Source:HGNC Symbol;Acc:HGNC:14671]
ENSG00000101464	-0.547755767407956	0.000191673171470264	PIGU	phosphatidylinositol glycan anchor biosynthesis class U [Source:HGNC Symbol;Acc:HGNC:15791]
ENSG00000101474	-0.637584179428567	5.82916752700527e-12	APMAP	adipocyte plasma membrane associated protein [Source:HGNC Symbol;Acc:HGNC:13238]
ENSG00000101546	-0.610628470275321	1.94009639843527e-08	RBFA	ribosome binding factor A [Source:HGNC Symbol;Acc:HGNC:26120]
ENSG00000101596	-0.428757872247122	4.36683190974606e-05	SMCHD1	structural maintenance of chromosomes flexible hinge domain containing 1 [Source:HGNC Symbol;Acc:HGNC:29090]
ENSG00000101670	3.40600846827167	2.42131769758532e-55	LIPG	lipase G, endothelial type [Source:HGNC Symbol;Acc:HGNC:6623]
ENSG00000101680	2.58716734189109	0.000358493464174668	LAMA1	laminin subunit alpha 1 [Source:HGNC Symbol;Acc:HGNC:6481]
ENSG00000101811	-0.6186330702696	2.77851800049478e-06	CSTF2	cleavage stimulation factor subunit 2 [Source:HGNC Symbol;Acc:HGNC:2484]
ENSG00000101844	0.621550232292962	4.79112886993862e-05	ATG4A	autophagy related 4A cysteine peptidase [Source:HGNC Symbol;Acc:HGNC:16489]
ENSG00000101846	-0.715074217957522	1.36754947269799e-06	STS	steroid sulfatase [Source:HGNC Symbol;Acc:HGNC:11425]
ENSG00000101868	-0.646543872843559	1.81578089556984e-05	POLA1	DNA polymerase alpha 1, catalytic subunit [Source:HGNC Symbol;Acc:HGNC:9173]
ENSG00000101911	-0.785517846997466	1.00647926538718e-11	PRPS2	phosphoribosyl pyrophosphate synthetase 2 [Source:HGNC Symbol;Acc:HGNC:9465]
ENSG00000101928	0.797868181759842	0.00040462012587333	MOSPD1	motile sperm domain containing 1 [Source:HGNC Symbol;Acc:HGNC:25235]
ENSG00000101938	3.84755450707573	7.99894963252889e-144	CHRDL1	chordin like 1 [Source:HGNC Symbol;Acc:HGNC:29861]
ENSG00000101945	-0.95065918873091	9.14376019382378e-07	SUV39H1	suppressor of variegation 3-9 homolog 1 [Source:HGNC Symbol;Acc:HGNC:11479]
ENSG00000102007	-0.826127002005919	1.02163318017222e-09	PLP2	proteolipid protein 2 [Source:HGNC Symbol;Acc:HGNC:9087]
ENSG00000102096	-0.679270518779065	0.000723217352818265	PIM2	Pim-2 proto-oncogene, serine/threonine kinase [Source:HGNC Symbol;Acc:HGNC:8987]
ENSG00000102098	-1.24896057129956	6.22995985574934e-09	SCML2	Scm polycomb group protein like 2 [Source:HGNC Symbol;Acc:HGNC:10581]
ENSG00000102144	-0.516568858252002	5.79691496504051e-07	PGK1	phosphoglycerate kinase 1 [Source:HGNC Symbol;Acc:HGNC:8896]
ENSG00000102172	-0.686398542017219	1.64204944484513e-10	SMS	spermine synthase [Source:HGNC Symbol;Acc:HGNC:11123]
ENSG00000102178	-0.902327804969009	6.44263431110894e-15	UBL4A	ubiquitin like 4A [Source:HGNC Symbol;Acc:HGNC:12505]
ENSG00000102181	-0.932393255272268	1.51795350470198e-18	CD99L2	CD99 molecule like 2 [Source:HGNC Symbol;Acc:HGNC:18237]
ENSG00000102225	-0.398716366118894	2.32672431956705e-05	CDK16	cyclin dependent kinase 16 [Source:HGNC Symbol;Acc:HGNC:8749]
ENSG00000102226	-0.341972255617711	0.000241122300081024	USP11	ubiquitin specific peptidase 11 [Source:HGNC Symbol;Acc:HGNC:12609]
ENSG00000102302	-0.685368958446253	3.23214380108258e-05	FGD1	FYVE, RhoGEF and PH domain containing 1 [Source:HGNC Symbol;Acc:HGNC:3663]
ENSG00000102359	2.66771535048901	4.74207522741792e-15	SRPX2	sushi repeat containing protein X-linked 2 [Source:HGNC Symbol;Acc:HGNC:30668]
ENSG00000102384	-1.15688370256307	5.64742399197132e-06	CENPI	centromere protein I [Source:HGNC Symbol;Acc:HGNC:3968]
ENSG00000102409	4.09961024490703	1.90518776912456e-05	BEX4	brain expressed X-linked 4 [Source:HGNC Symbol;Acc:HGNC:25475]
ENSG00000102554	-0.687094568315456	0.000466534631657319	KLF5	Kruppel like factor 5 [Source:HGNC Symbol;Acc:HGNC:6349]
ENSG00000102743	-0.580646343289386	0.000310769336040459	SLC25A15	solute carrier family 25 member 15 [Source:HGNC Symbol;Acc:HGNC:10985]
ENSG00000102753	-0.478595088928721	8.21913104868724e-07	KPNA3	karyopherin subunit alpha 3 [Source:HGNC Symbol;Acc:HGNC:6396]
ENSG00000102781	-0.830542525419628	0.000624957561058555	KATNAL1	katanin catalytic subunit A1 like 1 [Source:HGNC Symbol;Acc:HGNC:28361]
ENSG00000102870	-0.532392985261406	3.31378549185703e-06	ZNF629	zinc finger protein 629 [Source:HGNC Symbol;Acc:HGNC:29008]
ENSG00000102882	-0.730876255208053	0.000283872677411184	MAPK3	mitogen-activated protein kinase 3 [Source:HGNC Symbol;Acc:HGNC:6877]
ENSG00000102897	0.655256005076815	1.71820140194873e-06	LYRM1	LYR motif containing 1 [Source:HGNC Symbol;Acc:HGNC:25074]
ENSG00000102898	-0.359615705686833	0.000571998041167223	NUTF2	nuclear transport factor 2 [Source:HGNC Symbol;Acc:HGNC:13722]
ENSG00000102901	-0.525849415968936	0.00042394041425088	CENPT	centromere protein T [Source:HGNC Symbol;Acc:HGNC:25787]
ENSG00000102908	2.00398678770176	2.79080074481473e-31	NFAT5	nuclear factor of activated T cells 5 [Source:HGNC Symbol;Acc:HGNC:7774]
ENSG00000102934	1.773863450027	1.93400920824449e-07	PLLP	plasmolipin [Source:HGNC Symbol;Acc:HGNC:18553]
ENSG00000102977	-0.550336738361472	3.57863968326619e-07	ACD	ACD shelterin complex subunit and telomerase recruitment factor [Source:HGNC Symbol;Acc:HGNC:25070]
ENSG00000103021	1.12618322268842	0.000190151163133306	CCDC113	coiled-coil domain containing 113 [Source:HGNC Symbol;Acc:HGNC:25002]
ENSG00000103056	3.36606659509022	3.352302163816e-11	SMPD3	sphingomyelin phosphodiesterase 3 [Source:HGNC Symbol;Acc:HGNC:14240]
ENSG00000103066	-0.708370479317877	3.88500733825068e-06	PLA2G15	phospholipase A2 group XV [Source:HGNC Symbol;Acc:HGNC:17163]
ENSG00000103145	-1.66942047650787	4.06633986149582e-31	HCFC1R1	host cell factor C1 regulator 1 [Source:HGNC Symbol;Acc:HGNC:21198]
ENSG00000103154	5.10448196527646	7.84327749712593e-62	NECAB2	N-terminal EF-hand calcium binding protein 2 [Source:HGNC Symbol;Acc:HGNC:23746]
ENSG00000103260	-0.660889911093913	0.000510838081319888	METRN	meteorin, glial cell differentiation regulator [Source:HGNC Symbol;Acc:HGNC:14151]
ENSG00000103316	1.31449721694852	0.000193555013324901	CRYM	crystallin mu [Source:HGNC Symbol;Acc:HGNC:2418]
ENSG00000103326	-0.577584515972487	3.3752210437311e-05	CAPN15	calpain 15 [Source:HGNC Symbol;Acc:HGNC:11182]
ENSG00000103335	-0.365032344327045	0.000839629729239284	PIEZO1	piezo type mechanosensitive ion channel component 1 [Source:HGNC Symbol;Acc:HGNC:28993]
ENSG00000103485	0.732476714462093	1.93938329235402e-06	QPRT	quinolinate phosphoribosyltransferase [Source:HGNC Symbol;Acc:HGNC:9755]
ENSG00000103495	-0.544221573619707	7.07683708368945e-05	MAZ	MYC associated zinc finger protein [Source:HGNC Symbol;Acc:HGNC:6914]
ENSG00000103507	-0.605243114400593	5.79029596910224e-05	BCKDK	branched chain keto acid dehydrogenase kinase [Source:HGNC Symbol;Acc:HGNC:16902]
ENSG00000103522	1.15657439426811	6.85232358912789e-10	IL21R	interleukin 21 receptor [Source:HGNC Symbol;Acc:HGNC:6006]
ENSG00000103599	0.963791746684777	9.86616977837239e-05	IQCH	IQ motif containing H [Source:HGNC Symbol;Acc:HGNC:25721]
ENSG00000103653	-0.717472766585516	2.00016872507038e-09	CSK	C-terminal Src kinase [Source:HGNC Symbol;Acc:HGNC:2444]
ENSG00000103742	1.90901145035156	1.46277664824955e-07	IGDCC4	immunoglobulin superfamily DCC subclass member 4 [Source:HGNC Symbol;Acc:HGNC:13770]
ENSG00000103855	-0.685929569133366	9.94911316736147e-05	CD276	CD276 molecule [Source:HGNC Symbol;Acc:HGNC:19137]
ENSG00000103942	-1.16951649391185	6.23687337875392e-08	HOMER2	homer scaffold protein 2 [Source:HGNC Symbol;Acc:HGNC:17513]
ENSG00000103966	-0.757453049195164	7.84727070563204e-11	EHD4	EH domain containing 4 [Source:HGNC Symbol;Acc:HGNC:3245]
ENSG00000104129	-1.05888595245367	6.87743227185879e-09	DNAJC17	DnaJ heat shock protein family (Hsp40) member C17 [Source:HGNC Symbol;Acc:HGNC:25556]
ENSG00000104219	-0.526202473499707	1.45352935971495e-07	ZDHHC2	zinc finger DHHC-type containing 2 [Source:HGNC Symbol;Acc:HGNC:18469]
ENSG00000104231	1.29130272144002	0.000151852118219483	ZFAND1	zinc finger AN1-type containing 1 [Source:HGNC Symbol;Acc:HGNC:25858]
ENSG00000104237	1.16435503556349	3.20085984181525e-13	RP1	RP1 axonemal microtubule associated [Source:HGNC Symbol;Acc:HGNC:10263]
ENSG00000104312	0.576841673357714	3.66263879803255e-05	RIPK2	receptor interacting serine/threonine kinase 2 [Source:HGNC Symbol;Acc:HGNC:10020]
ENSG00000104321	3.10712008183927	1.32361619644392e-09	TRPA1	transient receptor potential cation channel subfamily A member 1 [Source:HGNC Symbol;Acc:HGNC:497]
ENSG00000104331	-0.599075538776643	2.95617164812217e-15	IMPAD1	inositol monophosphatase domain containing 1 [Source:HGNC Symbol;Acc:HGNC:26019]
ENSG00000104356	-0.639192664108595	0.000338451238190577	POP1	POP1 homolog, ribonuclease P/MRP subunit [Source:HGNC Symbol;Acc:HGNC:30129]
ENSG00000104368	1.97838050336999	3.40622403623683e-11	PLAT	plasminogen activator, tissue type [Source:HGNC Symbol;Acc:HGNC:9051]
ENSG00000104369	2.7829355122066	9.13644309197645e-15	JPH1	junctophilin 1 [Source:HGNC Symbol;Acc:HGNC:14201]
ENSG00000104375	-0.492843989042971	0.000163065058914548	STK3	serine/threonine kinase 3 [Source:HGNC Symbol;Acc:HGNC:11406]
ENSG00000104381	1.62194234706589	1.98786692272019e-06	GDAP1	ganglioside induced differentiation associated protein 1 [Source:HGNC Symbol;Acc:HGNC:15968]
ENSG00000104388	-0.376164497179174	0.000280974068416699	RAB2A	RAB2A, member RAS oncogene family [Source:HGNC Symbol;Acc:HGNC:9763]
ENSG00000104413	3.68452388558357	2.64409200132696e-11	ESRP1	epithelial splicing regulatory protein 1 [Source:HGNC Symbol;Acc:HGNC:25966]
ENSG00000104419	-3.50912719440905	6.46509326277085e-37	NDRG1	N-myc downstream regulated 1 [Source:HGNC Symbol;Acc:HGNC:7679]
ENSG00000104447	1.1002531848515	4.80153500387758e-05	TRPS1	transcriptional repressor GATA binding 1 [Source:HGNC Symbol;Acc:HGNC:12340]
ENSG00000104537	1.79600767217381	9.84185010840169e-05	ANXA13	annexin A13 [Source:HGNC Symbol;Acc:HGNC:536]
ENSG00000104549	-1.26163623583504	4.68232109030032e-06	SQLE	squalene epoxidase [Source:HGNC Symbol;Acc:HGNC:11279]
ENSG00000104611	0.759087903886622	0.000591993362419847	SH2D4A	SH2 domain containing 4A [Source:HGNC Symbol;Acc:HGNC:26102]
ENSG00000104626	-0.572405622048476	6.20423640726705e-06	ERI1	exoribonuclease 1 [Source:HGNC Symbol;Acc:HGNC:23994]
ENSG00000104679	-0.456658664907005	3.11320679394983e-06	R3HCC1	R3H domain and coiled-coil containing 1 [Source:HGNC Symbol;Acc:HGNC:27329]
ENSG00000104728	-0.634764621822631	7.39142690512649e-05	ARHGEF10	Rho guanine nucleotide exchange factor 10 [Source:HGNC Symbol;Acc:HGNC:14103]
ENSG00000104738	-1.53668992839306	1.84294864332467e-07	MCM4	minichromosome maintenance complex component 4 [Source:HGNC Symbol;Acc:HGNC:6947]
ENSG00000104763	0.309460661467041	0.000284713592812829	ASAH1	N-acylsphingosine amidohydrolase 1 [Source:HGNC Symbol;Acc:HGNC:735]
ENSG00000104765	-0.760285695768761	9.94513259831454e-12	BNIP3L	BCL2 interacting protein 3 like [Source:HGNC Symbol;Acc:HGNC:1085]
ENSG00000104774	0.606469077908685	2.93270914205295e-10	MAN2B1	mannosidase alpha class 2B member 1 [Source:HGNC Symbol;Acc:HGNC:6826]
ENSG00000104783	1.17824414456258	0.000318252906568128	KCNN4	potassium calcium-activated channel subfamily N member 4 [Source:HGNC Symbol;Acc:HGNC:6293]
ENSG00000104805	-0.491819280578533	0.000283495428563632	NUCB1	nucleobindin 1 [Source:HGNC Symbol;Acc:HGNC:8043]
ENSG00000104812	-1.09145420473837	6.52643770361604e-08	GYS1	glycogen synthase 1 [Source:HGNC Symbol;Acc:HGNC:4706]
ENSG00000104823	0.53770451658002	6.29680620746217e-07	ECH1	enoyl-CoA hydratase 1 [Source:HGNC Symbol;Acc:HGNC:3149]
ENSG00000104824	-0.305016584782414	0.000445502360879977	HNRNPL	heterogeneous nuclear ribonucleoprotein L [Source:HGNC Symbol;Acc:HGNC:5045]
ENSG00000104833	2.06975434813114	9.48874730027279e-06	TUBB4A	tubulin beta 4A class IVa [Source:HGNC Symbol;Acc:HGNC:20774]
ENSG00000104852	-0.478507188719519	1.42366400844512e-05	SNRNP70	small nuclear ribonucleoprotein U1 subunit 70 [Source:HGNC Symbol;Acc:HGNC:11150]
ENSG00000104853	-0.556706887898201	1.0287264894274e-09	CLPTM1	CLPTM1 regulator of GABA type A receptor forward trafficking [Source:HGNC Symbol;Acc:HGNC:2087]
ENSG00000104856	0.664081241509683	1.38230952526656e-06	RELB	RELB proto-oncogene, NF-kB subunit [Source:HGNC Symbol;Acc:HGNC:9956]
ENSG00000104866	-0.803974808405675	2.6302589534527e-09	PPP1R37	protein phosphatase 1 regulatory subunit 37 [Source:HGNC Symbol;Acc:HGNC:27607]
ENSG00000104881	-1.28307535256787	6.459099567305e-25	PPP1R13L	protein phosphatase 1 regulatory subunit 13 like [Source:HGNC Symbol;Acc:HGNC:18838]
ENSG00000104884	-1.4038578849443	2.40496753275729e-20	ERCC2	ERCC excision repair 2, TFIIH core complex helicase subunit [Source:HGNC Symbol;Acc:HGNC:3434]
ENSG00000104885	-0.413105502176403	0.000683730629787536	DOT1L	DOT1 like histone lysine methyltransferase [Source:HGNC Symbol;Acc:HGNC:24948]
ENSG00000104886	-0.598559049762633	1.82968558701195e-05	PLEKHJ1	pleckstrin homology domain containing J1 [Source:HGNC Symbol;Acc:HGNC:18211]
ENSG00000104897	-0.469144936011539	0.00024615855148531	SF3A2	splicing factor 3a subunit 2 [Source:HGNC Symbol;Acc:HGNC:10766]
ENSG00000104951	0.96851619326647	1.26608624318368e-12	IL4I1	interleukin 4 induced 1 [Source:HGNC Symbol;Acc:HGNC:19094]
ENSG00000104960	-0.803694393524483	2.98395556639008e-06	PTOV1	PTOV1 extended AT-hook containing adaptor protein [Source:HGNC Symbol;Acc:HGNC:9632]
ENSG00000104969	-0.398163698744504	3.64221695256701e-05	SGTA	small glutamine rich tetratricopeptide repeat containing alpha [Source:HGNC Symbol;Acc:HGNC:10819]
ENSG00000104973	-0.811261973163258	0.000149161561988892	MED25	mediator complex subunit 25 [Source:HGNC Symbol;Acc:HGNC:28845]
ENSG00000104983	-0.899636459430546	1.4254595469004e-07	CCDC61	coiled-coil domain containing 61 [Source:HGNC Symbol;Acc:HGNC:33629]
ENSG00000105011	-0.804528579616134	0.000262109395286276	ASF1B	anti-silencing function 1B histone chaperone [Source:HGNC Symbol;Acc:HGNC:20996]
ENSG00000105053	-0.707332593623439	1.24652072862055e-05	VRK3	VRK serine/threonine kinase 3 [Source:HGNC Symbol;Acc:HGNC:18996]
ENSG00000105063	-0.717332949275404	4.18455433187551e-08	PPP6R1	protein phosphatase 6 regulatory subunit 1 [Source:HGNC Symbol;Acc:HGNC:29195]
ENSG00000105136	1.11253037005145	0.000191220518732675	ZNF419	zinc finger protein 419 [Source:HGNC Symbol;Acc:HGNC:20648]
ENSG00000105137	-0.780974823066005	5.91949894304382e-17	SYDE1	synapse defective Rho GTPase homolog 1 [Source:HGNC Symbol;Acc:HGNC:25824]
ENSG00000105186	-0.686466040287262	1.00306612344774e-09	ANKRD27	ankyrin repeat domain 27 [Source:HGNC Symbol;Acc:HGNC:25310]
ENSG00000105202	-0.684217110308853	1.88755281499919e-07	FBL	fibrillarin [Source:HGNC Symbol;Acc:HGNC:3599]
ENSG00000105220	-0.666206898719089	5.94688836731437e-10	GPI	glucose-6-phosphate isomerase [Source:HGNC Symbol;Acc:HGNC:4458]
ENSG00000105221	-0.660427582645053	8.1349290726828e-06	AKT2	AKT serine/threonine kinase 2 [Source:HGNC Symbol;Acc:HGNC:392]
ENSG00000105245	-0.992307931958254	1.57569507599278e-05	NUMBL	NUMB like endocytic adaptor protein [Source:HGNC Symbol;Acc:HGNC:8061]
ENSG00000105246	1.66973119611188	2.29490908447771e-16	EBI3	Epstein-Barr virus induced 3 [Source:HGNC Symbol;Acc:HGNC:3129]
ENSG00000105248	-0.700095350140946	7.77098964984423e-05	YJU2	YJU2 splicing factor homolog [Source:HGNC Symbol;Acc:HGNC:25518]
ENSG00000105254	-0.583477956703206	2.32823082605002e-08	TBCB	tubulin folding cofactor B [Source:HGNC Symbol;Acc:HGNC:1989]
ENSG00000105298	-0.535554060546024	9.68298652832871e-06	CACTIN	cactin, spliceosome C complex subunit [Source:HGNC Symbol;Acc:HGNC:29938]
ENSG00000105323	-0.903162555865954	1.31933851597071e-08	HNRNPUL1	heterogeneous nuclear ribonucleoprotein U like 1 [Source:HGNC Symbol;Acc:HGNC:17011]
ENSG00000105325	-0.811462273707127	0.000634822742148459	FZR1	fizzy and cell division cycle 20 related 1 [Source:HGNC Symbol;Acc:HGNC:24824]
ENSG00000105327	1.14618071575741	2.83679122981274e-08	BBC3	BCL2 binding component 3 [Source:HGNC Symbol;Acc:HGNC:17868]
ENSG00000105329	-1.57121247990575	2.6101017168578e-70	TGFB1	transforming growth factor beta 1 [Source:HGNC Symbol;Acc:HGNC:11766]
ENSG00000105339	-0.814172521239977	0.000460493902916907	DENND3	DENN domain containing 3 [Source:HGNC Symbol;Acc:HGNC:29134]
ENSG00000105341	-0.838196558254954	1.3992979455446e-08	DMAC2	distal membrane arm assembly complex 2 [Source:HGNC Symbol;Acc:HGNC:25496]
ENSG00000105355	-0.756001120783379	0.000495762182122078	PLIN3	perilipin 3 [Source:HGNC Symbol;Acc:HGNC:16893]
ENSG00000105376	1.21039643738477	3.70246406884645e-08	ICAM5	intercellular adhesion molecule 5 [Source:HGNC Symbol;Acc:HGNC:5348]
ENSG00000105404	-0.676222237011931	1.53731536272307e-05	RABAC1	Rab acceptor 1 [Source:HGNC Symbol;Acc:HGNC:9794]
ENSG00000105419	2.17420485293421	3.77801601155538e-13	MEIS3	Meis homeobox 3 [Source:HGNC Symbol;Acc:HGNC:29537]
ENSG00000105438	-0.462905573820267	0.000119159461522211	KDELR1	KDEL endoplasmic reticulum protein retention receptor 1 [Source:HGNC Symbol;Acc:HGNC:6304]
ENSG00000105447	-0.803070674722963	2.25815610588132e-13	GRWD1	glutamate rich WD repeat containing 1 [Source:HGNC Symbol;Acc:HGNC:21270]
ENSG00000105486	-1.16273419001424	2.31572919379424e-05	LIG1	DNA ligase 1 [Source:HGNC Symbol;Acc:HGNC:6598]
ENSG00000105497	-1.83503846725421	1.21322292336248e-08	ZNF175	zinc finger protein 175 [Source:HGNC Symbol;Acc:HGNC:12964]
ENSG00000105499	2.2129774874326	4.22561398160312e-15	PLA2G4C	phospholipase A2 group IVC [Source:HGNC Symbol;Acc:HGNC:9037]
ENSG00000105514	2.51390033596719	1.37429356551852e-69	RAB3D	RAB3D, member RAS oncogene family [Source:HGNC Symbol;Acc:HGNC:9779]
ENSG00000105518	0.546731185484901	1.50938157791611e-05	TMEM205	transmembrane protein 205 [Source:HGNC Symbol;Acc:HGNC:29631]
ENSG00000105538	3.42779112829223	0.000436954576377741	RASIP1	Ras interacting protein 1 [Source:HGNC Symbol;Acc:HGNC:24716]
ENSG00000105550	6.12139240045589	2.24170532362726e-06	FGF21	fibroblast growth factor 21 [Source:HGNC Symbol;Acc:HGNC:3678]
ENSG00000105559	1.1492034228055	1.8154932742724e-10	PLEKHA4	pleckstrin homology domain containing A4 [Source:HGNC Symbol;Acc:HGNC:14339]
ENSG00000105568	-0.59540956686123	4.38732446633477e-11	PPP2R1A	protein phosphatase 2 scaffold subunit Aalpha [Source:HGNC Symbol;Acc:HGNC:9302]
ENSG00000105612	0.81988676847684	2.76857455585764e-06	DNASE2	deoxyribonuclease 2, lysosomal [Source:HGNC Symbol;Acc:HGNC:2960]
ENSG00000105617	-0.577516496994929	0.000707155007777277	LENG1	leukocyte receptor cluster member 1 [Source:HGNC Symbol;Acc:HGNC:15502]
ENSG00000105618	-0.542561036909884	1.57881150263931e-10	PRPF31	pre-mRNA processing factor 31 [Source:HGNC Symbol;Acc:HGNC:15446]
ENSG00000105655	1.80080746376878	8.0243664012861e-10	ISYNA1	inositol-3-phosphate synthase 1 [Source:HGNC Symbol;Acc:HGNC:29821]
ENSG00000105699	0.782823516258984	0.00018218180793965	LSR	lipolysis stimulated lipoprotein receptor [Source:HGNC Symbol;Acc:HGNC:29572]
ENSG00000105711	-1.94378048606783	3.47567474847815e-21	SCN1B	sodium voltage-gated channel beta subunit 1 [Source:HGNC Symbol;Acc:HGNC:10586]
ENSG00000105723	-0.46427531033023	5.43192618378187e-05	GSK3A	glycogen synthase kinase 3 alpha [Source:HGNC Symbol;Acc:HGNC:4616]
ENSG00000105732	-0.608918961376236	7.32547838648232e-08	ZNF574	zinc finger protein 574 [Source:HGNC Symbol;Acc:HGNC:26166]
ENSG00000105755	0.692366446607434	1.97810273567855e-05	ETHE1	ETHE1 persulfide dioxygenase [Source:HGNC Symbol;Acc:HGNC:23287]
ENSG00000105825	1.88320691912931	2.43697239070503e-63	TFPI2	tissue factor pathway inhibitor 2 [Source:HGNC Symbol;Acc:HGNC:11761]
ENSG00000105835	0.79703628979743	0.000896721087903701	NAMPT	nicotinamide phosphoribosyltransferase [Source:HGNC Symbol;Acc:HGNC:30092]
ENSG00000105855	-1.8792248220845	0.000788472962894483	ITGB8	integrin subunit beta 8 [Source:HGNC Symbol;Acc:HGNC:6163]
ENSG00000105866	-0.879134927903979	0.00091009386003441	SP4	Sp4 transcription factor [Source:HGNC Symbol;Acc:HGNC:11209]
ENSG00000105875	-1.3602315284145	0.000843783250691618	WDR91	WD repeat domain 91 [Source:HGNC Symbol;Acc:HGNC:24997]
ENSG00000105877	1.35630018799454	9.96184128011428e-05	DNAH11	dynein axonemal heavy chain 11 [Source:HGNC Symbol;Acc:HGNC:2942]
ENSG00000105928	0.537815405889298	0.000186896801679397	GSDME	gasdermin E [Source:HGNC Symbol;Acc:HGNC:2810]
ENSG00000105939	1.07492638804379	1.08632648190581e-06	ZC3HAV1	zinc finger CCCH-type containing, antiviral 1 [Source:HGNC Symbol;Acc:HGNC:23721]
ENSG00000105963	1.65043465082084	2.13961199369104e-05	ADAP1	ArfGAP with dual PH domains 1 [Source:HGNC Symbol;Acc:HGNC:16486]
ENSG00000105967	2.16396811223359	1.16103793089088e-05	TFEC	transcription factor EC [Source:HGNC Symbol;Acc:HGNC:11754]
ENSG00000105968	-0.768808356176835	1.43452111449234e-15	H2AFV	H2A histone family member V [Source:HGNC Symbol;Acc:HGNC:20664]
ENSG00000105971	-1.10016393243827	3.33814525410641e-21	CAV2	caveolin 2 [Source:HGNC Symbol;Acc:HGNC:1528]
ENSG00000105974	-2.11773361195098	1.80789762063435e-20	CAV1	caveolin 1 [Source:HGNC Symbol;Acc:HGNC:1527]
ENSG00000105982	1.29092579319	2.02202256923146e-05	RNF32	ring finger protein 32 [Source:HGNC Symbol;Acc:HGNC:17118]
ENSG00000105983	-0.467494510520141	1.90327521129863e-05	LMBR1	limb development membrane protein 1 [Source:HGNC Symbol;Acc:HGNC:13243]
ENSG00000105996	-1.18791351639606	4.99388102985249e-07	HOXA2	homeobox A2 [Source:HGNC Symbol;Acc:HGNC:5103]
ENSG00000106003	-1.0130392299175	6.86819099915599e-19	LFNG	LFNG O-fucosylpeptide 3-beta-N-acetylglucosaminyltransferase [Source:HGNC Symbol;Acc:HGNC:6560]
ENSG00000106009	-0.910247436978655	1.17870386885997e-05	BRAT1	BRCA1 associated ATM activator 1 [Source:HGNC Symbol;Acc:HGNC:21701]
ENSG00000106049	0.979085988345833	5.22513043374341e-05	HIBADH	3-hydroxyisobutyrate dehydrogenase [Source:HGNC Symbol;Acc:HGNC:4907]
ENSG00000106052	0.619490635291204	3.39548063655892e-06	TAX1BP1	Tax1 binding protein 1 [Source:HGNC Symbol;Acc:HGNC:11575]
ENSG00000106070	0.821482679367387	6.87259974310902e-05	GRB10	growth factor receptor bound protein 10 [Source:HGNC Symbol;Acc:HGNC:4564]
ENSG00000106077	-0.616202595090247	3.0772976158577e-06	ABHD11	abhydrolase domain containing 11 [Source:HGNC Symbol;Acc:HGNC:16407]
ENSG00000106089	0.556800995904309	0.000174759023251969	STX1A	syntaxin 1A [Source:HGNC Symbol;Acc:HGNC:11433]
ENSG00000106105	1.00603838555802	4.64494381426432e-05	GARS	glycyl-tRNA synthetase [Source:HGNC Symbol;Acc:HGNC:4162]
ENSG00000106211	-1.52063312688151	1.37244002184118e-10	HSPB1	heat shock protein family B (small) member 1 [Source:HGNC Symbol;Acc:HGNC:5246]
ENSG00000106244	-0.509134194808767	4.14591715113791e-06	PDAP1	PDGFA associated protein 1 [Source:HGNC Symbol;Acc:HGNC:14634]
ENSG00000106258	1.62397252388237	1.57187920532091e-12	CYP3A5	cytochrome P450 family 3 subfamily A member 5 [Source:HGNC Symbol;Acc:HGNC:2638]
ENSG00000106266	-0.558661543316111	1.75505574082969e-09	SNX8	sorting nexin 8 [Source:HGNC Symbol;Acc:HGNC:14972]
ENSG00000106290	-0.652840268898331	1.98759377869754e-07	TAF6	TATA-box binding protein associated factor 6 [Source:HGNC Symbol;Acc:HGNC:11540]
ENSG00000106330	-0.83642670480919	9.33162525611049e-07	MOSPD3	motile sperm domain containing 3 [Source:HGNC Symbol;Acc:HGNC:25078]
ENSG00000106348	-1.11025353635641	1.29353794805479e-19	IMPDH1	inosine monophosphate dehydrogenase 1 [Source:HGNC Symbol;Acc:HGNC:6052]
ENSG00000106351	-1.17441086426816	7.63182947764932e-09	AGFG2	ArfGAP with FG repeats 2 [Source:HGNC Symbol;Acc:HGNC:5177]
ENSG00000106366	-2.01172102447421	0.000379797112390755	SERPINE1	serpin family E member 1 [Source:HGNC Symbol;Acc:HGNC:8583]
ENSG00000106462	-0.362087038830305	6.61362105895842e-05	EZH2	enhancer of zeste 2 polycomb repressive complex 2 subunit [Source:HGNC Symbol;Acc:HGNC:3527]
ENSG00000106537	0.82955929034044	1.32732616510743e-08	TSPAN13	tetraspanin 13 [Source:HGNC Symbol;Acc:HGNC:21643]
ENSG00000106538	-0.926978561716967	2.45098564471452e-11	RARRES2	retinoic acid receptor responder 2 [Source:HGNC Symbol;Acc:HGNC:9868]
ENSG00000106554	-0.495501865383256	2.23341327622868e-06	CHCHD3	coiled-coil-helix-coiled-coil-helix domain containing 3 [Source:HGNC Symbol;Acc:HGNC:21906]
ENSG00000106605	-0.54558128595382	0.000141886137570537	BLVRA	biliverdin reductase A [Source:HGNC Symbol;Acc:HGNC:1062]
ENSG00000106609	-0.666795119552234	2.19221814152949e-06	TMEM248	transmembrane protein 248 [Source:HGNC Symbol;Acc:HGNC:25476]
ENSG00000106617	-0.644490681988433	8.2463517453376e-09	PRKAG2	protein kinase AMP-activated non-catalytic subunit gamma 2 [Source:HGNC Symbol;Acc:HGNC:9386]
ENSG00000106628	-0.466575468305703	3.18317901222825e-06	POLD2	DNA polymerase delta 2, accessory subunit [Source:HGNC Symbol;Acc:HGNC:9176]
ENSG00000106686	1.4058774736346	5.10798642358109e-08	SPATA6L	spermatogenesis associated 6 like [Source:HGNC Symbol;Acc:HGNC:25472]
ENSG00000106688	-1.16555663703796	4.05820750783308e-06	SLC1A1	solute carrier family 1 member 1 [Source:HGNC Symbol;Acc:HGNC:10939]
ENSG00000106733	0.350376306954331	0.000941927905409121	NMRK1	nicotinamide riboside kinase 1 [Source:HGNC Symbol;Acc:HGNC:26057]
ENSG00000106772	1.63170335517102	5.36089230418092e-05	PRUNE2	prune homolog 2 with BCH domain [Source:HGNC Symbol;Acc:HGNC:25209]
ENSG00000106799	-0.511837992823618	0.000480273734005577	TGFBR1	transforming growth factor beta receptor 1 [Source:HGNC Symbol;Acc:HGNC:11772]
ENSG00000106853	0.666209833618347	8.41823897974274e-08	PTGR1	prostaglandin reductase 1 [Source:HGNC Symbol;Acc:HGNC:18429]
ENSG00000106927	1.56613758132508	8.80607782295983e-14	AMBP	alpha-1-microglobulin/bikunin precursor [Source:HGNC Symbol;Acc:HGNC:453]
ENSG00000106948	2.26858133680982	1.50669053626628e-35	AKNA	AT-hook transcription factor [Source:HGNC Symbol;Acc:HGNC:24108]
ENSG00000106991	1.91162724855797	3.83133426340546e-18	ENG	endoglin [Source:HGNC Symbol;Acc:HGNC:3349]
ENSG00000107021	-0.493062818683174	0.00067107671810974	TBC1D13	TBC1 domain family member 13 [Source:HGNC Symbol;Acc:HGNC:25571]
ENSG00000107104	-0.813862255927917	0.000143077058101508	KANK1	KN motif and ankyrin repeat domains 1 [Source:HGNC Symbol;Acc:HGNC:19309]
ENSG00000107130	-0.846026120983526	7.26032802355612e-14	NCS1	neuronal calcium sensor 1 [Source:HGNC Symbol;Acc:HGNC:3953]
ENSG00000107201	2.15799072467139	1.3999277547746e-22	DDX58	DExD/H-box helicase 58 [Source:HGNC Symbol;Acc:HGNC:19102]
ENSG00000107262	-0.756676267345822	1.1672642712331e-05	BAG1	BCL2 associated athanogene 1 [Source:HGNC Symbol;Acc:HGNC:937]
ENSG00000107263	-0.891435178066471	6.46532716084641e-10	RAPGEF1	Rap guanine nucleotide exchange factor 1 [Source:HGNC Symbol;Acc:HGNC:4568]
ENSG00000107282	-2.48474535381626	1.23431815742761e-06	APBA1	amyloid beta precursor protein binding family A member 1 [Source:HGNC Symbol;Acc:HGNC:578]
ENSG00000107317	1.14580792168929	0.000133499792587832	PTGDS	prostaglandin D2 synthase [Source:HGNC Symbol;Acc:HGNC:9592]
ENSG00000107331	-1.15415383401908	1.20278042739475e-06	ABCA2	ATP binding cassette subfamily A member 2 [Source:HGNC Symbol;Acc:HGNC:32]
ENSG00000107338	-2.0635443475333	1.37821301959657e-10	SHB	SH2 domain containing adaptor protein B [Source:HGNC Symbol;Acc:HGNC:10838]
ENSG00000107372	0.394431116328859	1.74265385448293e-05	ZFAND5	zinc finger AN1-type containing 5 [Source:HGNC Symbol;Acc:HGNC:13008]
ENSG00000107438	-0.876354014993948	6.60886515157271e-10	PDLIM1	PDZ and LIM domain 1 [Source:HGNC Symbol;Acc:HGNC:2067]
ENSG00000107518	-1.67167618759542	1.30624689202735e-13	ATRNL1	attractin like 1 [Source:HGNC Symbol;Acc:HGNC:29063]
ENSG00000107551	-2.58671472603351	3.28129553105529e-14	RASSF4	Ras association domain family member 4 [Source:HGNC Symbol;Acc:HGNC:20793]
ENSG00000107554	-0.821073852902991	1.72429189448409e-10	DNMBP	dynamin binding protein [Source:HGNC Symbol;Acc:HGNC:30373]
ENSG00000107566	-0.634446467741765	6.89177065132881e-13	ERLIN1	ER lipid raft associated 1 [Source:HGNC Symbol;Acc:HGNC:16947]
ENSG00000107593	4.49327253048665	2.01863856895904e-06	PKD2L1	polycystin 2 like 1, transient receptor potential cation channel [Source:HGNC Symbol;Acc:HGNC:9011]
ENSG00000107614	-0.646052722800928	4.42097187718421e-06	TRDMT1	tRNA aspartic acid methyltransferase 1 [Source:HGNC Symbol;Acc:HGNC:2977]
ENSG00000107625	-0.439852038350405	0.000119273691278247	DDX50	DExD-box helicase 50 [Source:HGNC Symbol;Acc:HGNC:17906]
ENSG00000107679	-1.51021472650301	3.02810635471915e-06	PLEKHA1	pleckstrin homology domain containing A1 [Source:HGNC Symbol;Acc:HGNC:14335]
ENSG00000107719	4.04089401386909	5.0172557969353e-05	PALD1	phosphatase domain containing paladin 1 [Source:HGNC Symbol;Acc:HGNC:23530]
ENSG00000107731	3.08554918878631	1.71184332207528e-17	UNC5B	unc-5 netrin receptor B [Source:HGNC Symbol;Acc:HGNC:12568]
ENSG00000107758	-0.485756698517947	0.000159844701743826	PPP3CB	protein phosphatase 3 catalytic subunit beta [Source:HGNC Symbol;Acc:HGNC:9315]
ENSG00000107796	-0.613413406847176	1.59497555022444e-05	ACTA2	actin alpha 2, smooth muscle [Source:HGNC Symbol;Acc:HGNC:130]
ENSG00000107819	-0.659165611982359	0.000257372819537568	SFXN3	sideroflexin 3 [Source:HGNC Symbol;Acc:HGNC:16087]
ENSG00000107863	-0.994173154311155	0.000190946389190693	ARHGAP21	Rho GTPase activating protein 21 [Source:HGNC Symbol;Acc:HGNC:23725]
ENSG00000107929	-0.493772561833787	7.22443280735479e-08	LARP4B	La ribonucleoprotein domain family member 4B [Source:HGNC Symbol;Acc:HGNC:28987]
ENSG00000108055	-0.512455423952443	2.79172864673329e-08	SMC3	structural maintenance of chromosomes 3 [Source:HGNC Symbol;Acc:HGNC:2468]
ENSG00000108175	-1.32000112555748	5.29969233574399e-05	ZMIZ1	zinc finger MIZ-type containing 1 [Source:HGNC Symbol;Acc:HGNC:16493]
ENSG00000108176	2.12636102709792	1.89090096251715e-20	DNAJC12	DnaJ heat shock protein family (Hsp40) member C12 [Source:HGNC Symbol;Acc:HGNC:28908]
ENSG00000108187	0.811812059497477	0.000116783314803734	PBLD	phenazine biosynthesis like protein domain containing [Source:HGNC Symbol;Acc:HGNC:23301]
ENSG00000108219	-1.18324984560303	8.50602231184587e-09	TSPAN14	tetraspanin 14 [Source:HGNC Symbol;Acc:HGNC:23303]
ENSG00000108239	-0.52430862470538	4.83731758159895e-08	TBC1D12	TBC1 domain family member 12 [Source:HGNC Symbol;Acc:HGNC:29082]
ENSG00000108262	-0.628523001671702	4.60191984250084e-08	GIT1	GIT ArfGAP 1 [Source:HGNC Symbol;Acc:HGNC:4272]
ENSG00000108312	-1.10967573123913	1.07699840206507e-05	UBTF	upstream binding transcription factor [Source:HGNC Symbol;Acc:HGNC:12511]
ENSG00000108370	0.814535020686805	6.83474580954043e-07	RGS9	regulator of G protein signaling 9 [Source:HGNC Symbol;Acc:HGNC:10004]
ENSG00000108384	0.968078679838276	1.84494744517867e-06	RAD51C	RAD51 paralog C [Source:HGNC Symbol;Acc:HGNC:9820]
ENSG00000108406	0.748052103204089	4.95752694272624e-11	DHX40	DEAH-box helicase 40 [Source:HGNC Symbol;Acc:HGNC:18018]
ENSG00000108468	-0.424746031414482	5.98752524797424e-06	CBX1	chromobox 1 [Source:HGNC Symbol;Acc:HGNC:1551]
ENSG00000108469	0.843798328994137	7.39847138654725e-13	RECQL5	RecQ like helicase 5 [Source:HGNC Symbol;Acc:HGNC:9950]
ENSG00000108509	1.26602105594155	0.000305767118076344	CAMTA2	calmodulin binding transcription activator 2 [Source:HGNC Symbol;Acc:HGNC:18807]
ENSG00000108515	1.20678294981481	1.70626093124409e-06	ENO3	enolase 3 [Source:HGNC Symbol;Acc:HGNC:3354]
ENSG00000108518	-0.922961444514365	2.18782199530365e-09	PFN1	profilin 1 [Source:HGNC Symbol;Acc:HGNC:8881]
ENSG00000108523	-0.437028135871302	8.33955290185513e-06	RNF167	ring finger protein 167 [Source:HGNC Symbol;Acc:HGNC:24544]
ENSG00000108528	-0.550254813949375	1.09068634959499e-06	SLC25A11	solute carrier family 25 member 11 [Source:HGNC Symbol;Acc:HGNC:10981]
ENSG00000108557	-0.73720195702057	2.06244495870352e-05	RAI1	retinoic acid induced 1 [Source:HGNC Symbol;Acc:HGNC:9834]
ENSG00000108561	-0.680577654999588	1.92418329667805e-08	C1QBP	complement C1q binding protein [Source:HGNC Symbol;Acc:HGNC:1243]
ENSG00000108582	0.916134497871974	1.29797888350165e-08	CPD	carboxypeptidase D [Source:HGNC Symbol;Acc:HGNC:2301]
ENSG00000108604	-0.724290720401297	2.9464033846325e-05	SMARCD2	SWI/SNF related, matrix associated, actin dependent regulator of chromatin, subfamily d, member 2 [Source:HGNC Symbol;Acc:HGNC:11107]
ENSG00000108622	1.55449613436577	7.88222225536662e-05	ICAM2	intercellular adhesion molecule 2 [Source:HGNC Symbol;Acc:HGNC:5345]
ENSG00000108669	0.647720434411875	2.85268958988042e-07	CYTH1	cytohesin 1 [Source:HGNC Symbol;Acc:HGNC:9501]
ENSG00000108679	0.530192358765281	5.75862097887445e-13	LGALS3BP	galectin 3 binding protein [Source:HGNC Symbol;Acc:HGNC:6564]
ENSG00000108771	2.69081805213804	1.08361119939132e-71	DHX58	DExH-box helicase 58 [Source:HGNC Symbol;Acc:HGNC:29517]
ENSG00000108797	-0.615559708415691	4.97872184729559e-05	CNTNAP1	contactin associated protein 1 [Source:HGNC Symbol;Acc:HGNC:8011]
ENSG00000108819	-0.349360161147563	0.000622181302401765	PPP1R9B	protein phosphatase 1 regulatory subunit 9B [Source:HGNC Symbol;Acc:HGNC:9298]
ENSG00000108829	-0.589669210329098	1.9181980977804e-06	LRRC59	leucine rich repeat containing 59 [Source:HGNC Symbol;Acc:HGNC:28817]
ENSG00000108852	-0.867848846776363	0.000743617581045281	MPP2	membrane palmitoylated protein 2 [Source:HGNC Symbol;Acc:HGNC:7220]
ENSG00000108924	2.46777257531557	7.95007559667032e-31	HLF	HLF transcription factor, PAR bZIP family member [Source:HGNC Symbol;Acc:HGNC:4977]
ENSG00000108947	-2.59779518753052	0.000527782802065018	EFNB3	ephrin B3 [Source:HGNC Symbol;Acc:HGNC:3228]
ENSG00000108953	-0.642322969109247	1.24865729148341e-11	YWHAE	tyrosine 3-monooxygenase/tryptophan 5-monooxygenase activation protein epsilon [Source:HGNC Symbol;Acc:HGNC:12851]
ENSG00000108963	-0.715145085847358	7.31943993060401e-10	DPH1	diphthamide biosynthesis 1 [Source:HGNC Symbol;Acc:HGNC:3003]
ENSG00000109065	0.708342340334267	0.000375182460432034	NAT9	N-acetyltransferase 9 (putative) [Source:HGNC Symbol;Acc:HGNC:23133]
ENSG00000109084	-1.10645344027194	1.16943937418531e-09	TMEM97	transmembrane protein 97 [Source:HGNC Symbol;Acc:HGNC:28106]
ENSG00000109099	-1.76953214178338	6.24379887175231e-11	PMP22	peripheral myelin protein 22 [Source:HGNC Symbol;Acc:HGNC:9118]
ENSG00000109255	-2.65787872298233	1.17186198746391e-11	NMU	neuromedin U [Source:HGNC Symbol;Acc:HGNC:7859]
ENSG00000109265	-2.04676734719167	4.81596970800446e-18	KIAA1211	KIAA1211 [Source:HGNC Symbol;Acc:HGNC:29219]
ENSG00000109320	-0.34397158139806	0.00081505597966498	NFKB1	nuclear factor kappa B subunit 1 [Source:HGNC Symbol;Acc:HGNC:7794]
ENSG00000109321	4.73290555310765	6.37855562228709e-11	AREG	amphiregulin [Source:HGNC Symbol;Acc:HGNC:651]
ENSG00000109501	-0.687837290382159	0.000923568461975731	WFS1	wolframin ER transmembrane glycoprotein [Source:HGNC Symbol;Acc:HGNC:12762]
ENSG00000109606	-0.435350118118871	8.35389904169404e-05	DHX15	DEAH-box helicase 15 [Source:HGNC Symbol;Acc:HGNC:2738]
ENSG00000109618	0.890887199644877	1.721898196057e-06	SEPSECS	Sep (O-phosphoserine) tRNA:Sec (selenocysteine) tRNA synthase [Source:HGNC Symbol;Acc:HGNC:30605]
ENSG00000109685	-0.647068818315382	4.5110700206122e-05	NSD2	nuclear receptor binding SET domain protein 2 [Source:HGNC Symbol;Acc:HGNC:12766]
ENSG00000109736	-0.537109533525269	2.32171957239731e-07	MFSD10	major facilitator superfamily domain containing 10 [Source:HGNC Symbol;Acc:HGNC:16894]
ENSG00000109738	-0.792406911326951	1.64670157272445e-08	GLRB	glycine receptor beta [Source:HGNC Symbol;Acc:HGNC:4329]
ENSG00000109794	-1.77096001417496	3.22787503885444e-27	FAM149A	family with sequence similarity 149 member A [Source:HGNC Symbol;Acc:HGNC:24527]
ENSG00000109805	-0.492100461144886	0.000387534405444607	NCAPG	non-SMC condensin I complex subunit G [Source:HGNC Symbol;Acc:HGNC:24304]
ENSG00000109814	-0.320501615363227	0.000368792146212389	UGDH	UDP-glucose 6-dehydrogenase [Source:HGNC Symbol;Acc:HGNC:12525]
ENSG00000109819	2.41235116998847	4.68772265427867e-22	PPARGC1A	PPARG coactivator 1 alpha [Source:HGNC Symbol;Acc:HGNC:9237]
ENSG00000109846	4.59515267036839	3.36476286914594e-84	CRYAB	crystallin alpha B [Source:HGNC Symbol;Acc:HGNC:2389]
ENSG00000109854	0.561764537683029	2.69794530643137e-07	HTATIP2	HIV-1 Tat interactive protein 2 [Source:HGNC Symbol;Acc:HGNC:16637]
ENSG00000109881	-0.83704250141362	7.47392565672293e-06	CCDC34	coiled-coil domain containing 34 [Source:HGNC Symbol;Acc:HGNC:25079]
ENSG00000109919	-0.399970192543417	3.73475750652807e-05	MTCH2	mitochondrial carrier 2 [Source:HGNC Symbol;Acc:HGNC:17587]
ENSG00000109971	-1.31838755231625	1.52253807422019e-08	HSPA8	heat shock protein family A (Hsp70) member 8 [Source:HGNC Symbol;Acc:HGNC:5241]
ENSG00000110013	0.569609050071161	2.18472687150857e-08	SIAE	sialic acid acetylesterase [Source:HGNC Symbol;Acc:HGNC:18187]
ENSG00000110031	0.478486825188425	6.39488237701474e-05	LPXN	leupaxin [Source:HGNC Symbol;Acc:HGNC:14061]
ENSG00000110047	-0.967632160775906	1.15507898394546e-06	EHD1	EH domain containing 1 [Source:HGNC Symbol;Acc:HGNC:3242]
ENSG00000110057	-0.764186918288716	7.02918588669282e-07	UNC93B1	unc-93 homolog B1, TLR signaling regulator [Source:HGNC Symbol;Acc:HGNC:13481]
ENSG00000110063	-0.802193782687407	6.00040947046772e-05	DCPS	decapping enzyme, scavenger [Source:HGNC Symbol;Acc:HGNC:29812]
ENSG00000110074	-0.361240577509757	0.000763113215889856	FOXRED1	FAD dependent oxidoreductase domain containing 1 [Source:HGNC Symbol;Acc:HGNC:26927]
ENSG00000110075	-0.447145640362924	8.66226767768323e-05	PPP6R3	protein phosphatase 6 regulatory subunit 3 [Source:HGNC Symbol;Acc:HGNC:1173]
ENSG00000110080	-1.01475641226568	3.32499066921287e-16	ST3GAL4	ST3 beta-galactoside alpha-2,3-sialyltransferase 4 [Source:HGNC Symbol;Acc:HGNC:10864]
ENSG00000110090	2.84042650280447	5.56768659190269e-43	CPT1A	carnitine palmitoyltransferase 1A [Source:HGNC Symbol;Acc:HGNC:2328]
ENSG00000110092	-2.3379366879372	1.91317862757497e-27	CCND1	cyclin D1 [Source:HGNC Symbol;Acc:HGNC:1582]
ENSG00000110104	-1.00925725168692	1.34573196270268e-34	CCDC86	coiled-coil domain containing 86 [Source:HGNC Symbol;Acc:HGNC:28359]
ENSG00000110107	-0.395948905159942	0.000191175054902369	PRPF19	pre-mRNA processing factor 19 [Source:HGNC Symbol;Acc:HGNC:17896]
ENSG00000110108	-0.892410634921614	1.56311682851802e-25	TMEM109	transmembrane protein 109 [Source:HGNC Symbol;Acc:HGNC:28771]
ENSG00000110171	-0.74069004333057	2.87376504558305e-07	TRIM3	tripartite motif containing 3 [Source:HGNC Symbol;Acc:HGNC:10064]
ENSG00000110172	-0.615842172410012	2.8350442202838e-06	CHORDC1	cysteine and histidine rich domain containing 1 [Source:HGNC Symbol;Acc:HGNC:14525]
ENSG00000110195	0.605594101435535	7.00669404620979e-06	FOLR1	folate receptor alpha [Source:HGNC Symbol;Acc:HGNC:3791]
ENSG00000110200	-0.541476463198543	1.01055169747522e-05	ANAPC15	anaphase promoting complex subunit 15 [Source:HGNC Symbol;Acc:HGNC:24531]
ENSG00000110237	-0.919424539331627	8.91274485435223e-15	ARHGEF17	Rho guanine nucleotide exchange factor 17 [Source:HGNC Symbol;Acc:HGNC:21726]
ENSG00000110244	-4.07198172671461	0.000124451284683807	APOA4	apolipoprotein A4 [Source:HGNC Symbol;Acc:HGNC:602]
ENSG00000110328	-1.15071387250479	5.09344336658936e-25	GALNT18	polypeptide N-acetylgalactosaminyltransferase 18 [Source:HGNC Symbol;Acc:HGNC:30488]
ENSG00000110367	-0.590704753053939	2.34315153769774e-05	DDX6	DEAD-box helicase 6 [Source:HGNC Symbol;Acc:HGNC:2747]
ENSG00000110455	0.782622167094798	2.05572264841649e-06	ACCS	1-aminocyclopropane-1-carboxylate synthase homolog (inactive) [Source:HGNC Symbol;Acc:HGNC:23989]
ENSG00000110492	0.655064054523228	3.38914873273891e-05	MDK	midkine [Source:HGNC Symbol;Acc:HGNC:6972]
ENSG00000110536	-0.49511755525646	0.000785294274984154	PTPMT1	protein tyrosine phosphatase mitochondrial 1 [Source:HGNC Symbol;Acc:HGNC:26965]
ENSG00000110583	-0.649370367189685	1.90405324132853e-06	NAA40	N(alpha)-acetyltransferase 40, NatD catalytic subunit [Source:HGNC Symbol;Acc:HGNC:25845]
ENSG00000110619	0.841250868761072	7.92998037689311e-06	CARS	cysteinyl-tRNA synthetase [Source:HGNC Symbol;Acc:HGNC:1493]
ENSG00000110628	0.903167871263088	3.32465330274195e-15	SLC22A18	solute carrier family 22 member 18 [Source:HGNC Symbol;Acc:HGNC:10964]
ENSG00000110651	-0.678138051180487	3.45354357818702e-10	CD81	CD81 molecule [Source:HGNC Symbol;Acc:HGNC:1701]
ENSG00000110693	2.43266616421736	1.10912491409448e-25	SOX6	SRY-box transcription factor 6 [Source:HGNC Symbol;Acc:HGNC:16421]
ENSG00000110711	-0.71653128468678	1.50266371242918e-06	AIP	aryl hydrocarbon receptor interacting protein [Source:HGNC Symbol;Acc:HGNC:358]
ENSG00000110713	-0.425972909480849	0.000266838282538603	NUP98	nucleoporin 98 [Source:HGNC Symbol;Acc:HGNC:8068]
ENSG00000110719	-1.18051962526363	8.16585086895909e-13	TCIRG1	T cell immune regulator 1, ATPase H+ transporting V0 subunit a3 [Source:HGNC Symbol;Acc:HGNC:11647]
ENSG00000110723	2.27237475065709	1.85967254448125e-10	EXPH5	exophilin 5 [Source:HGNC Symbol;Acc:HGNC:30578]
ENSG00000110841	0.786000716798956	7.57669819946097e-07	PPFIBP1	PPFIA binding protein 1 [Source:HGNC Symbol;Acc:HGNC:9249]
ENSG00000110852	0.8068386097389	0.000679563521623493	CLEC2B	C-type lectin domain family 2 member B [Source:HGNC Symbol;Acc:HGNC:2053]
ENSG00000110880	-0.946185368240824	8.09092503402088e-15	CORO1C	coronin 1C [Source:HGNC Symbol;Acc:HGNC:2254]
ENSG00000110881	-1.30028320160054	3.25285412009818e-07	ASIC1	acid sensing ion channel subunit 1 [Source:HGNC Symbol;Acc:HGNC:100]
ENSG00000110906	-0.634428076424472	1.08779494204165e-12	KCTD10	potassium channel tetramerization domain containing 10 [Source:HGNC Symbol;Acc:HGNC:23236]
ENSG00000110911	0.360091552201872	0.000256114835212764	SLC11A2	solute carrier family 11 member 2 [Source:HGNC Symbol;Acc:HGNC:10908]
ENSG00000110917	-1.09431822363228	2.19558638418784e-07	MLEC	malectin [Source:HGNC Symbol;Acc:HGNC:28973]
ENSG00000110921	-1.29402219396852	1.34317696903386e-07	MVK	mevalonate kinase [Source:HGNC Symbol;Acc:HGNC:7530]
ENSG00000110931	-0.483794541550569	3.8562319794127e-07	CAMKK2	calcium/calmodulin dependent protein kinase kinase 2 [Source:HGNC Symbol;Acc:HGNC:1470]
ENSG00000110944	2.11523441155911	2.28119658530912e-05	IL23A	interleukin 23 subunit alpha [Source:HGNC Symbol;Acc:HGNC:15488]
ENSG00000111057	-0.419322594045192	0.000684681580727649	KRT18	keratin 18 [Source:HGNC Symbol;Acc:HGNC:6430]
ENSG00000111077	-1.24923767054392	7.10650529174987e-08	TNS2	tensin 2 [Source:HGNC Symbol;Acc:HGNC:19737]
ENSG00000111087	2.21019319199792	7.07612709399702e-05	GLI1	GLI family zinc finger 1 [Source:HGNC Symbol;Acc:HGNC:4317]
ENSG00000111110	0.921273466892743	1.86653882337083e-12	PPM1H	protein phosphatase, Mg2+/Mn2+ dependent 1H [Source:HGNC Symbol;Acc:HGNC:18583]
ENSG00000111181	3.12003232176258	2.03033877850266e-05	SLC6A12	solute carrier family 6 member 12 [Source:HGNC Symbol;Acc:HGNC:11045]
ENSG00000111224	0.799654379787799	0.000202915531766702	PARP11	poly(ADP-ribose) polymerase family member 11 [Source:HGNC Symbol;Acc:HGNC:1186]
ENSG00000111261	1.32723374398974	1.1626631550132e-12	MANSC1	MANSC domain containing 1 [Source:HGNC Symbol;Acc:HGNC:25505]
ENSG00000111275	1.78240682035989	1.15272238886382e-53	ALDH2	aldehyde dehydrogenase 2 family member [Source:HGNC Symbol;Acc:HGNC:404]
ENSG00000111319	1.47273833977122	2.82202115519883e-22	SCNN1A	sodium channel epithelial 1 alpha subunit [Source:HGNC Symbol;Acc:HGNC:10599]
ENSG00000111328	-0.808448334622501	4.80665729781439e-06	CDK2AP1	cyclin dependent kinase 2 associated protein 1 [Source:HGNC Symbol;Acc:HGNC:14002]
ENSG00000111335	4.14789128857408	7.21333565767727e-28	OAS2	2'-5'-oligoadenylate synthetase 2 [Source:HGNC Symbol;Acc:HGNC:8087]
ENSG00000111348	-0.440087002889049	0.000473986880791736	ARHGDIB	Rho GDP dissociation inhibitor beta [Source:HGNC Symbol;Acc:HGNC:679]
ENSG00000111361	-0.404592595501418	3.93112481122226e-05	EIF2B1	eukaryotic translation initiation factor 2B subunit alpha [Source:HGNC Symbol;Acc:HGNC:3257]
ENSG00000111424	3.20699034334322	3.03344286986021e-07	VDR	vitamin D receptor [Source:HGNC Symbol;Acc:HGNC:12679]
ENSG00000111445	-0.760709143997296	4.86654714834613e-08	RFC5	replication factor C subunit 5 [Source:HGNC Symbol;Acc:HGNC:9973]
ENSG00000111450	-0.944821895090472	1.28578434101393e-13	STX2	syntaxin 2 [Source:HGNC Symbol;Acc:HGNC:3403]
ENSG00000111481	0.59512640450173	6.41870511256992e-07	COPZ1	coatomer protein complex subunit zeta 1 [Source:HGNC Symbol;Acc:HGNC:2243]
ENSG00000111490	3.09494635653849	2.95956771893684e-07	TBC1D30	TBC1 domain family member 30 [Source:HGNC Symbol;Acc:HGNC:29164]
ENSG00000111615	0.456736996632791	1.63503829403281e-05	KRR1	KRR1 small subunit processome component homolog [Source:HGNC Symbol;Acc:HGNC:5176]
ENSG00000111665	-0.778625399833526	0.000154453992723302	CDCA3	cell division cycle associated 3 [Source:HGNC Symbol;Acc:HGNC:14624]
ENSG00000111669	-0.707189682827566	3.09917225952874e-05	TPI1	triosephosphate isomerase 1 [Source:HGNC Symbol;Acc:HGNC:12009]
ENSG00000111671	1.14175314138033	1.17105378926773e-06	SPSB2	splA/ryanodine receptor domain and SOCS box containing 2 [Source:HGNC Symbol;Acc:HGNC:29522]
ENSG00000111674	-1.92131022935095	2.40595720274205e-22	ENO2	enolase 2 [Source:HGNC Symbol;Acc:HGNC:3353]
ENSG00000111696	-0.757435839195018	8.63722737406874e-06	NT5DC3	5'-nucleotidase domain containing 3 [Source:HGNC Symbol;Acc:HGNC:30826]
ENSG00000111707	-0.569205752310007	0.000612242546467231	SUDS3	SDS3 homolog, SIN3A corepressor complex component [Source:HGNC Symbol;Acc:HGNC:29545]
ENSG00000111716	0.55749145277418	4.34116278204613e-06	LDHB	lactate dehydrogenase B [Source:HGNC Symbol;Acc:HGNC:6541]
ENSG00000111727	-1.03542899942291	2.68642582054167e-07	HCFC2	host cell factor C2 [Source:HGNC Symbol;Acc:HGNC:24972]
ENSG00000111737	-0.456544432708856	1.46748723781928e-08	RAB35	RAB35, member RAS oncogene family [Source:HGNC Symbol;Acc:HGNC:9774]
ENSG00000111752	-0.621613826201156	0.00010790535649789	PHC1	polyhomeotic homolog 1 [Source:HGNC Symbol;Acc:HGNC:3182]
ENSG00000111799	0.943049205338414	1.16103793089088e-05	COL12A1	collagen type XII alpha 1 chain [Source:HGNC Symbol;Acc:HGNC:2188]
ENSG00000111817	-0.360096604561315	0.000871989851177684	DSE	dermatan sulfate epimerase [Source:HGNC Symbol;Acc:HGNC:21144]
ENSG00000111832	-0.467868834820885	0.00035059023849639	RWDD1	RWD domain containing 1 [Source:HGNC Symbol;Acc:HGNC:20993]
ENSG00000111846	1.8141121143751	8.15896248268806e-08	GCNT2	glucosaminyl (N-acetyl) transferase 2 (I blood group) [Source:HGNC Symbol;Acc:HGNC:4204]
ENSG00000111859	-2.4755122231158	9.00571085730275e-08	NEDD9	neural precursor cell expressed, developmentally down-regulated 9 [Source:HGNC Symbol;Acc:HGNC:7733]
ENSG00000111875	0.753257964291757	1.71970061139611e-05	ASF1A	anti-silencing function 1A histone chaperone [Source:HGNC Symbol;Acc:HGNC:20995]
ENSG00000111880	-0.655439696936945	3.47614447478007e-06	RNGTT	RNA guanylyltransferase and 5'-phosphatase [Source:HGNC Symbol;Acc:HGNC:10073]
ENSG00000111885	-0.948856333063327	9.19055319787858e-06	MAN1A1	mannosidase alpha class 1A member 1 [Source:HGNC Symbol;Acc:HGNC:6821]
ENSG00000111907	0.529081867214121	1.68820518184161e-06	TPD52L1	TPD52 like 1 [Source:HGNC Symbol;Acc:HGNC:12006]
ENSG00000111913	3.09606583667085	1.18149525612226e-09	RIPOR2	RHO family interacting cell polarization regulator 2 [Source:HGNC Symbol;Acc:HGNC:13872]
ENSG00000111981	2.51523604303025	3.95983133026256e-13	ULBP1	UL16 binding protein 1 [Source:HGNC Symbol;Acc:HGNC:14893]
ENSG00000112029	-0.755006806621828	4.75040452666508e-07	FBXO5	F-box protein 5 [Source:HGNC Symbol;Acc:HGNC:13584]
ENSG00000112038	2.06011729043694	4.56034334484142e-06	OPRM1	opioid receptor mu 1 [Source:HGNC Symbol;Acc:HGNC:8156]
ENSG00000112039	-1.4404058214022	2.03459518881306e-10	FANCE	FA complementation group E [Source:HGNC Symbol;Acc:HGNC:3586]
ENSG00000112096	0.493579081451977	1.14378635171884e-09	SOD2	superoxide dismutase 2 [Source:HGNC Symbol;Acc:HGNC:11180]
ENSG00000112110	-0.526977090596048	7.15573681274526e-06	MRPL18	mitochondrial ribosomal protein L18 [Source:HGNC Symbol;Acc:HGNC:14477]
ENSG00000112118	-1.43769931117306	4.94246125185284e-07	MCM3	minichromosome maintenance complex component 3 [Source:HGNC Symbol;Acc:HGNC:6945]
ENSG00000112130	-0.667254609899677	1.29757380963135e-05	RNF8	ring finger protein 8 [Source:HGNC Symbol;Acc:HGNC:10071]
ENSG00000112137	2.27971737592074	1.98389247205077e-15	PHACTR1	phosphatase and actin regulator 1 [Source:HGNC Symbol;Acc:HGNC:20990]
ENSG00000112144	-1.06045193433592	1.18957097482118e-19	ICK	intestinal cell kinase [Source:HGNC Symbol;Acc:HGNC:21219]
ENSG00000112167	-0.54179006357275	0.000530791178239039	SAYSD1	SAYSVFN motif domain containing 1 [Source:HGNC Symbol;Acc:HGNC:21025]
ENSG00000112183	-0.935288720353113	3.63319827162601e-05	RBM24	RNA binding motif protein 24 [Source:HGNC Symbol;Acc:HGNC:21539]
ENSG00000112246	-1.53551770136569	0.000795445554565811	SIM1	SIM bHLH transcription factor 1 [Source:HGNC Symbol;Acc:HGNC:10882]
ENSG00000112299	2.11712658579638	3.17308409220103e-08	VNN1	vanin 1 [Source:HGNC Symbol;Acc:HGNC:12705]
ENSG00000112312	-0.923548711941842	9.40775093376413e-06	GMNN	geminin DNA replication inhibitor [Source:HGNC Symbol;Acc:HGNC:17493]
ENSG00000112335	-0.552664553117535	3.51328921921271e-05	SNX3	sorting nexin 3 [Source:HGNC Symbol;Acc:HGNC:11174]
ENSG00000112339	-0.390107710080768	0.00033766973613001	HBS1L	HBS1 like translational GTPase [Source:HGNC Symbol;Acc:HGNC:4834]
ENSG00000112343	1.17265746826086	3.49312950414899e-21	TRIM38	tripartite motif containing 38 [Source:HGNC Symbol;Acc:HGNC:10059]
ENSG00000112367	0.435748117722351	2.68544671734736e-05	FIG4	FIG4 phosphoinositide 5-phosphatase [Source:HGNC Symbol;Acc:HGNC:16873]
ENSG00000112414	-1.38871020013084	1.15056871730114e-14	ADGRG6	adhesion G protein-coupled receptor G6 [Source:HGNC Symbol;Acc:HGNC:13841]
ENSG00000112473	-0.518753944038527	4.99136060355511e-05	SLC39A7	solute carrier family 39 member 7 [Source:HGNC Symbol;Acc:HGNC:4927]
ENSG00000112486	-5.26779783516733	0.000917782691162657	CCR6	C-C motif chemokine receptor 6 [Source:HGNC Symbol;Acc:HGNC:1607]
ENSG00000112541	-1.02333734198255	5.70418285357734e-09	PDE10A	phosphodiesterase 10A [Source:HGNC Symbol;Acc:HGNC:8772]
ENSG00000112576	-0.772070451944607	2.29464308856213e-05	CCND3	cyclin D3 [Source:HGNC Symbol;Acc:HGNC:1585]
ENSG00000112640	-1.03803897454932	2.4030631345118e-09	PPP2R5D	protein phosphatase 2 regulatory subunit B'delta [Source:HGNC Symbol;Acc:HGNC:9312]
ENSG00000112658	-0.719443082347737	1.10305470556708e-09	SRF	serum response factor [Source:HGNC Symbol;Acc:HGNC:11291]
ENSG00000112699	-0.506149562163553	0.000500485921357743	GMDS	GDP-mannose 4,6-dehydratase [Source:HGNC Symbol;Acc:HGNC:4369]
ENSG00000112715	-0.779471807128488	7.06023157690563e-09	VEGFA	vascular endothelial growth factor A [Source:HGNC Symbol;Acc:HGNC:12680]
ENSG00000112759	-1.41423527544789	5.47252117316532e-24	SLC29A1	solute carrier family 29 member 1 (Augustine blood group) [Source:HGNC Symbol;Acc:HGNC:11003]
ENSG00000112763	-0.376697516450944	0.000496585141619581	BTN2A1	butyrophilin subfamily 2 member A1 [Source:HGNC Symbol;Acc:HGNC:1136]
ENSG00000112787	-1.26166238929781	1.26326109604482e-18	FBRSL1	fibrosin like 1 [Source:HGNC Symbol;Acc:HGNC:29308]
ENSG00000112877	-0.500435283939596	0.00034364136531961	CEP72	centrosomal protein 72 [Source:HGNC Symbol;Acc:HGNC:25547]
ENSG00000112902	-1.81348242861662	2.79640167731605e-11	SEMA5A	semaphorin 5A [Source:HGNC Symbol;Acc:HGNC:10736]
ENSG00000112941	-0.508290753154936	6.55686204929457e-05	TENT4A	terminal nucleotidyltransferase 4A [Source:HGNC Symbol;Acc:HGNC:16705]
ENSG00000112972	-1.09012809228843	0.000266533900789607	HMGCS1	3-hydroxy-3-methylglutaryl-CoA synthase 1 [Source:HGNC Symbol;Acc:HGNC:5007]
ENSG00000112977	-0.34183838847967	2.76857455585764e-06	DAP	death associated protein [Source:HGNC Symbol;Acc:HGNC:2672]
ENSG00000112983	2.56981272083598	2.50002829085002e-93	BRD8	bromodomain containing 8 [Source:HGNC Symbol;Acc:HGNC:19874]
ENSG00000112992	-0.443537515672576	0.000763113215889856	NNT	nicotinamide nucleotide transhydrogenase [Source:HGNC Symbol;Acc:HGNC:7863]
ENSG00000113048	-0.41595513507795	0.000334434567069055	MRPS27	mitochondrial ribosomal protein S27 [Source:HGNC Symbol;Acc:HGNC:14512]
ENSG00000113161	-0.985652952965651	5.81818127125819e-05	HMGCR	3-hydroxy-3-methylglutaryl-CoA reductase [Source:HGNC Symbol;Acc:HGNC:5006]
ENSG00000113205	2.41721620473003	5.38543112374968e-06	PCDHB3	protocadherin beta 3 [Source:HGNC Symbol;Acc:HGNC:8688]
ENSG00000113269	-0.427795182202805	6.66339062842298e-05	RNF130	ring finger protein 130 [Source:HGNC Symbol;Acc:HGNC:18280]
ENSG00000113356	-0.777481031721634	5.83456067470022e-06	POLR3G	RNA polymerase III subunit G [Source:HGNC Symbol;Acc:HGNC:30075]
ENSG00000113360	-0.573363495687098	1.84482491518106e-07	DROSHA	drosha ribonuclease III [Source:HGNC Symbol;Acc:HGNC:17904]
ENSG00000113368	-1.56882214144998	4.25853278502112e-09	LMNB1	lamin B1 [Source:HGNC Symbol;Acc:HGNC:6637]
ENSG00000113369	-3.05798960337618	1.08875499798472e-24	ARRDC3	arrestin domain containing 3 [Source:HGNC Symbol;Acc:HGNC:29263]
ENSG00000113391	-0.566831269411258	0.000505813242595987	FAM172A	family with sequence similarity 172 member A [Source:HGNC Symbol;Acc:HGNC:25365]
ENSG00000113441	-0.942580885464574	1.07140278995752e-14	LNPEP	leucyl and cystinyl aminopeptidase [Source:HGNC Symbol;Acc:HGNC:6656]
ENSG00000113456	-0.474338436195435	5.05926238489431e-06	RAD1	RAD1 checkpoint DNA exonuclease [Source:HGNC Symbol;Acc:HGNC:9806]
ENSG00000113492	1.65304756617228	3.6858181369367e-23	AGXT2	alanine--glyoxylate aminotransferase 2 [Source:HGNC Symbol;Acc:HGNC:14412]
ENSG00000113504	-1.17757255620201	3.65962473358971e-08	SLC12A7	solute carrier family 12 member 7 [Source:HGNC Symbol;Acc:HGNC:10915]
ENSG00000113555	3.22182994570335	7.96424464464376e-05	PCDH12	protocadherin 12 [Source:HGNC Symbol;Acc:HGNC:8657]
ENSG00000113569	-0.563307060996029	3.70956827294058e-06	NUP155	nucleoporin 155 [Source:HGNC Symbol;Acc:HGNC:8063]
ENSG00000113580	-0.71066648775309	1.72478145290121e-08	NR3C1	nuclear receptor subfamily 3 group C member 1 [Source:HGNC Symbol;Acc:HGNC:7978]
ENSG00000113594	-1.19931695154436	9.66090588917859e-07	LIFR	LIF receptor subunit alpha [Source:HGNC Symbol;Acc:HGNC:6597]
ENSG00000113621	-0.431636468364781	0.00094587055977226	TXNDC15	thioredoxin domain containing 15 [Source:HGNC Symbol;Acc:HGNC:20652]
ENSG00000113648	-0.457011534555804	1.35560873328162e-05	H2AFY	H2A histone family member Y [Source:HGNC Symbol;Acc:HGNC:4740]
ENSG00000113657	-0.549804505044603	0.000119826296426667	DPYSL3	dihydropyrimidinase like 3 [Source:HGNC Symbol;Acc:HGNC:3015]
ENSG00000113719	-0.824294156096119	5.81098678447449e-11	ERGIC1	endoplasmic reticulum-golgi intermediate compartment 1 [Source:HGNC Symbol;Acc:HGNC:29205]
ENSG00000113721	1.78482017334922	1.94813217775568e-09	PDGFRB	platelet derived growth factor receptor beta [Source:HGNC Symbol;Acc:HGNC:8804]
ENSG00000113763	3.38224277937152	3.5250748855399e-32	UNC5A	unc-5 netrin receptor A [Source:HGNC Symbol;Acc:HGNC:12567]
ENSG00000113810	-0.605652704496511	0.000141368059844815	SMC4	structural maintenance of chromosomes 4 [Source:HGNC Symbol;Acc:HGNC:14013]
ENSG00000113924	1.37832365104739	1.43082681810865e-22	HGD	homogentisate 1,2-dioxygenase [Source:HGNC Symbol;Acc:HGNC:4892]
ENSG00000113946	6.58038786257998	1.46005931638574e-60	CLDN16	claudin 16 [Source:HGNC Symbol;Acc:HGNC:2037]
ENSG00000114200	2.90955780227546	9.09353814277812e-45	BCHE	butyrylcholinesterase [Source:HGNC Symbol;Acc:HGNC:983]
ENSG00000114248	4.61783925858247	7.79363334506455e-10	LRRC31	leucine rich repeat containing 31 [Source:HGNC Symbol;Acc:HGNC:26261]
ENSG00000114251	2.46242235448815	3.54620751989782e-21	WNT5A	Wnt family member 5A [Source:HGNC Symbol;Acc:HGNC:12784]
ENSG00000114270	-0.405477417995177	4.2081650629276e-05	COL7A1	collagen type VII alpha 1 chain [Source:HGNC Symbol;Acc:HGNC:2214]
ENSG00000114315	0.76192382532068	1.71356258401941e-08	HES1	hes family bHLH transcription factor 1 [Source:HGNC Symbol;Acc:HGNC:5192]
ENSG00000114353	-1.2236849831931	3.21009579540613e-15	GNAI2	G protein subunit alpha i2 [Source:HGNC Symbol;Acc:HGNC:4385]
ENSG00000114416	-0.378466549923458	0.000505033523339488	FXR1	FMR1 autosomal homolog 1 [Source:HGNC Symbol;Acc:HGNC:4023]
ENSG00000114450	-0.574074740504927	0.000297950368402426	GNB4	G protein subunit beta 4 [Source:HGNC Symbol;Acc:HGNC:20731]
ENSG00000114455	-1.517413199334	2.55998946454819e-07	HHLA2	HERV-H LTR-associating 2 [Source:HGNC Symbol;Acc:HGNC:4905]
ENSG00000114480	-0.604548328882397	4.15064840132458e-05	GBE1	1,4-alpha-glucan branching enzyme 1 [Source:HGNC Symbol;Acc:HGNC:4180]
ENSG00000114491	-0.573127758278398	0.000400416776735419	UMPS	uridine monophosphate synthetase [Source:HGNC Symbol;Acc:HGNC:12563]
ENSG00000114544	-0.783549695059958	1.09171835613252e-15	SLC41A3	solute carrier family 41 member 3 [Source:HGNC Symbol;Acc:HGNC:31046]
ENSG00000114554	-0.966104553993504	1.61100657419972e-15	PLXNA1	plexin A1 [Source:HGNC Symbol;Acc:HGNC:9099]
ENSG00000114638	3.04386085713157	9.40596296970753e-20	UPK1B	uroplakin 1B [Source:HGNC Symbol;Acc:HGNC:12578]
ENSG00000114779	0.595551748074728	4.11395772638565e-08	ABHD14B	abhydrolase domain containing 14B [Source:HGNC Symbol;Acc:HGNC:28235]
ENSG00000114784	0.918317416653093	0.000473986880791736	EIF1B	eukaryotic translation initiation factor 1B [Source:HGNC Symbol;Acc:HGNC:30792]
ENSG00000114796	0.829545010052751	7.76026694766228e-07	KLHL24	kelch like family member 24 [Source:HGNC Symbol;Acc:HGNC:25947]
ENSG00000114805	0.736803856499576	9.55810763568513e-06	PLCH1	phospholipase C eta 1 [Source:HGNC Symbol;Acc:HGNC:29185]
ENSG00000114841	1.67603693561042	1.64887233285994e-15	DNAH1	dynein axonemal heavy chain 1 [Source:HGNC Symbol;Acc:HGNC:2940]
ENSG00000114859	-1.10406037994248	1.52563362716976e-15	CLCN2	chloride voltage-gated channel 2 [Source:HGNC Symbol;Acc:HGNC:2020]
ENSG00000114904	-0.484251637262502	8.22871162736772e-06	NEK4	NIMA related kinase 4 [Source:HGNC Symbol;Acc:HGNC:11399]
ENSG00000114923	0.844138871099079	0.00012255714660705	SLC4A3	solute carrier family 4 member 3 [Source:HGNC Symbol;Acc:HGNC:11029]
ENSG00000114982	0.725859169780188	4.75191905417463e-11	KANSL3	KAT8 regulatory NSL complex subunit 3 [Source:HGNC Symbol;Acc:HGNC:25473]
ENSG00000115020	0.757800732977927	1.90015185096402e-05	PIKFYVE	phosphoinositide kinase, FYVE-type zinc finger containing [Source:HGNC Symbol;Acc:HGNC:23785]
ENSG00000115073	-0.744352406717349	1.30368244831686e-16	ACTR1B	actin related protein 1B [Source:HGNC Symbol;Acc:HGNC:168]
ENSG00000115107	-0.788283518690127	2.42739758458819e-07	STEAP3	STEAP3 metalloreductase [Source:HGNC Symbol;Acc:HGNC:24592]
ENSG00000115170	0.592650150071156	1.6916660760331e-07	ACVR1	activin A receptor type 1 [Source:HGNC Symbol;Acc:HGNC:171]
ENSG00000115232	-1.26185766554049	2.05981452123493e-05	ITGA4	integrin subunit alpha 4 [Source:HGNC Symbol;Acc:HGNC:6140]
ENSG00000115233	0.508576944083222	9.05603399644589e-06	PSMD14	proteasome 26S subunit, non-ATPase 14 [Source:HGNC Symbol;Acc:HGNC:16889]
ENSG00000115267	2.61418411895335	2.37743141788774e-33	IFIH1	interferon induced with helicase C domain 1 [Source:HGNC Symbol;Acc:HGNC:18873]
ENSG00000115295	1.465161962059	5.85983406197925e-07	CLIP4	CAP-Gly domain containing linker protein family member 4 [Source:HGNC Symbol;Acc:HGNC:26108]
ENSG00000115306	0.497804985569956	1.44193294919865e-05	SPTBN1	spectrin beta, non-erythrocytic 1 [Source:HGNC Symbol;Acc:HGNC:11275]
ENSG00000115317	-0.40827276294371	0.000410641269042065	HTRA2	HtrA serine peptidase 2 [Source:HGNC Symbol;Acc:HGNC:14348]
ENSG00000115318	1.3037327198241	0.000269526193761999	LOXL3	lysyl oxidase like 3 [Source:HGNC Symbol;Acc:HGNC:13869]
ENSG00000115339	0.574666148608478	6.18384531421207e-05	GALNT3	polypeptide N-acetylgalactosaminyltransferase 3 [Source:HGNC Symbol;Acc:HGNC:4125]
ENSG00000115363	0.802786046147459	8.8698581514894e-14	EVA1A	eva-1 homolog A, regulator of programmed cell death [Source:HGNC Symbol;Acc:HGNC:25816]
ENSG00000115414	2.70460923275724	6.7936215885144e-132	FN1	fibronectin 1 [Source:HGNC Symbol;Acc:HGNC:3778]
ENSG00000115423	1.12730286146108	9.93977579627787e-05	DNAH6	dynein axonemal heavy chain 6 [Source:HGNC Symbol;Acc:HGNC:2951]
ENSG00000115425	1.08749519978565	1.47971806062888e-20	PECR	peroxisomal trans-2-enoyl-CoA reductase [Source:HGNC Symbol;Acc:HGNC:18281]
ENSG00000115446	0.704542209090831	1.56705883222035e-06	UNC50	unc-50 inner nuclear membrane RNA binding protein [Source:HGNC Symbol;Acc:HGNC:16046]
ENSG00000115464	0.493410007584165	5.59850829945178e-05	USP34	ubiquitin specific peptidase 34 [Source:HGNC Symbol;Acc:HGNC:20066]
ENSG00000115468	1.53470408406462	4.78607546734344e-10	EFHD1	EF-hand domain family member D1 [Source:HGNC Symbol;Acc:HGNC:29556]
ENSG00000115507	-0.85338589004846	0.000297784579319355	OTX1	orthodenticle homeobox 1 [Source:HGNC Symbol;Acc:HGNC:8521]
ENSG00000115514	0.712888240978596	8.56610553155145e-09	TXNDC9	thioredoxin domain containing 9 [Source:HGNC Symbol;Acc:HGNC:24110]
ENSG00000115520	1.11685429724873	8.21980582646974e-08	COQ10B	coenzyme Q10B [Source:HGNC Symbol;Acc:HGNC:25819]
ENSG00000115590	0.862277511171389	0.000280059301100378	IL1R2	interleukin 1 receptor type 2 [Source:HGNC Symbol;Acc:HGNC:5994]
ENSG00000115594	2.55228191144903	2.46525624789205e-99	IL1R1	interleukin 1 receptor type 1 [Source:HGNC Symbol;Acc:HGNC:5993]
ENSG00000115604	2.45950122025886	4.71941326593732e-19	IL18R1	interleukin 18 receptor 1 [Source:HGNC Symbol;Acc:HGNC:5988]
ENSG00000115641	0.971030306634498	1.06787184431734e-16	FHL2	four and a half LIM domains 2 [Source:HGNC Symbol;Acc:HGNC:3703]
ENSG00000115648	1.70205263824247	4.52987792144217e-05	MLPH	melanophilin [Source:HGNC Symbol;Acc:HGNC:29643]
ENSG00000115649	-0.616409635410926	7.08363278266299e-13	CNPPD1	cyclin Pas1/PHO80 domain containing 1 [Source:HGNC Symbol;Acc:HGNC:25220]
ENSG00000115657	1.09103555637713	4.25041270314016e-06	ABCB6	ATP binding cassette subfamily B member 6 (Langereis blood group) [Source:HGNC Symbol;Acc:HGNC:47]
ENSG00000115661	0.537618058203495	2.12893979753177e-06	STK16	serine/threonine kinase 16 [Source:HGNC Symbol;Acc:HGNC:11394]
ENSG00000115756	-1.16265156264687	2.2949952380737e-09	HPCAL1	hippocalcin like 1 [Source:HGNC Symbol;Acc:HGNC:5145]
ENSG00000115762	0.554854842295563	2.62867372844528e-05	PLEKHB2	pleckstrin homology domain containing B2 [Source:HGNC Symbol;Acc:HGNC:19236]
ENSG00000115839	0.404660873234702	0.000174905187426683	RAB3GAP1	RAB3 GTPase activating protein catalytic subunit 1 [Source:HGNC Symbol;Acc:HGNC:17063]
ENSG00000115884	-1.51188356995375	1.27495035936534e-13	SDC1	syndecan 1 [Source:HGNC Symbol;Acc:HGNC:10658]
ENSG00000115919	3.79840286092897	3.60868430905573e-81	KYNU	kynureninase [Source:HGNC Symbol;Acc:HGNC:6469]
ENSG00000115956	1.62089821630501	5.3453989905975e-14	PLEK	pleckstrin [Source:HGNC Symbol;Acc:HGNC:9070]
ENSG00000115977	0.808239518733965	1.05192135418945e-05	AAK1	AP2 associated kinase 1 [Source:HGNC Symbol;Acc:HGNC:19679]
ENSG00000115993	0.949317249745324	1.25357655603022e-05	TRAK2	trafficking kinesin protein 2 [Source:HGNC Symbol;Acc:HGNC:13206]
ENSG00000115998	1.20489101238937	1.89840387074971e-07	C2orf42	chromosome 2 open reading frame 42 [Source:HGNC Symbol;Acc:HGNC:26056]
ENSG00000116001	0.507551421277659	0.000112177327894885	TIA1	TIA1 cytotoxic granule associated RNA binding protein [Source:HGNC Symbol;Acc:HGNC:11802]
ENSG00000116014	-6.2774538217382	5.19018211080548e-11	KISS1R	KISS1 receptor [Source:HGNC Symbol;Acc:HGNC:4510]
ENSG00000116017	-1.09558297284405	1.09461894285838e-13	ARID3A	AT-rich interaction domain 3A [Source:HGNC Symbol;Acc:HGNC:3031]
ENSG00000116044	0.912693511677741	1.20032103061863e-07	NFE2L2	nuclear factor, erythroid 2 like 2 [Source:HGNC Symbol;Acc:HGNC:7782]
ENSG00000116062	-1.27832782033383	6.70008108708686e-06	MSH6	mutS homolog 6 [Source:HGNC Symbol;Acc:HGNC:7329]
ENSG00000116095	0.716227716201022	4.90464553797206e-08	PLEKHA3	pleckstrin homology domain containing A3 [Source:HGNC Symbol;Acc:HGNC:14338]
ENSG00000116133	-1.10021445852947	1.18739871186445e-07	DHCR24	24-dehydrocholesterol reductase [Source:HGNC Symbol;Acc:HGNC:2859]
ENSG00000116138	0.475193735192867	3.03775299317528e-05	DNAJC16	DnaJ heat shock protein family (Hsp40) member C16 [Source:HGNC Symbol;Acc:HGNC:29157]
ENSG00000116147	2.97225820726173	1.53676867752265e-12	TNR	tenascin R [Source:HGNC Symbol;Acc:HGNC:11953]
ENSG00000116151	0.837346879424779	0.000104878376508664	MORN1	MORN repeat containing 1 [Source:HGNC Symbol;Acc:HGNC:25852]
ENSG00000116183	3.48267805770468	4.16570388750185e-26	PAPPA2	pappalysin 2 [Source:HGNC Symbol;Acc:HGNC:14615]
ENSG00000116237	-0.908846617521888	6.70939587373793e-07	ICMT	isoprenylcysteine carboxyl methyltransferase [Source:HGNC Symbol;Acc:HGNC:5350]
ENSG00000116266	0.546076311499124	4.30992574884031e-07	STXBP3	syntaxin binding protein 3 [Source:HGNC Symbol;Acc:HGNC:11446]
ENSG00000116273	-0.459006157545801	0.000151485804997358	PHF13	PHD finger protein 13 [Source:HGNC Symbol;Acc:HGNC:22983]
ENSG00000116285	-1.87953687397195	6.2818266609928e-29	ERRFI1	ERBB receptor feedback inhibitor 1 [Source:HGNC Symbol;Acc:HGNC:18185]
ENSG00000116299	0.91998252063018	0.000275131808166191	KIAA1324	KIAA1324 [Source:HGNC Symbol;Acc:HGNC:29618]
ENSG00000116337	-1.26741012930921	3.68812093239552e-07	AMPD2	adenosine monophosphate deaminase 2 [Source:HGNC Symbol;Acc:HGNC:469]
ENSG00000116514	0.738407028356253	0.000409361794744736	RNF19B	ring finger protein 19B [Source:HGNC Symbol;Acc:HGNC:26886]
ENSG00000116580	0.671523827985611	1.91796850395403e-10	GON4L	gon-4 like [Source:HGNC Symbol;Acc:HGNC:25973]
ENSG00000116584	2.13758613084036	1.61356019571416e-15	ARHGEF2	Rho/Rac guanine nucleotide exchange factor 2 [Source:HGNC Symbol;Acc:HGNC:682]
ENSG00000116604	0.86754605493472	6.14531762123029e-08	MEF2D	myocyte enhancer factor 2D [Source:HGNC Symbol;Acc:HGNC:6997]
ENSG00000116649	-0.465811057745359	3.54604370308694e-05	SRM	spermidine synthase [Source:HGNC Symbol;Acc:HGNC:11296]
ENSG00000116668	0.801118037501695	2.37205602380036e-07	SWT1	SWT1 RNA endoribonuclease homolog [Source:HGNC Symbol;Acc:HGNC:16785]
ENSG00000116678	-0.532835117877675	1.72395952732063e-05	LEPR	leptin receptor [Source:HGNC Symbol;Acc:HGNC:6554]
ENSG00000116685	-0.517849915142865	0.000581947820479482	KIAA2013	KIAA2013 [Source:HGNC Symbol;Acc:HGNC:28513]
ENSG00000116701	5.40167331551826	9.49194458656913e-08	NCF2	neutrophil cytosolic factor 2 [Source:HGNC Symbol;Acc:HGNC:7661]
ENSG00000116704	0.546893886449582	9.96656972850189e-08	SLC35D1	solute carrier family 35 member D1 [Source:HGNC Symbol;Acc:HGNC:20800]
ENSG00000116711	2.36541527122748	1.21436080772676e-09	PLA2G4A	phospholipase A2 group IVA [Source:HGNC Symbol;Acc:HGNC:9035]
ENSG00000116717	2.36010644530093	0.000192048977152864	GADD45A	growth arrest and DNA damage inducible alpha [Source:HGNC Symbol;Acc:HGNC:4095]
ENSG00000116729	-2.57532655817761	4.02929116899981e-143	WLS	Wnt ligand secretion mediator [Source:HGNC Symbol;Acc:HGNC:30238]
ENSG00000116752	0.430492724432754	0.000625123978306177	BCAS2	BCAS2 pre-mRNA processing factor [Source:HGNC Symbol;Acc:HGNC:975]
ENSG00000116761	4.22418476776866	1.36085960643162e-12	CTH	cystathionine gamma-lyase [Source:HGNC Symbol;Acc:HGNC:2501]
ENSG00000116871	-0.378104169795769	0.000820305064467047	MAP7D1	MAP7 domain containing 1 [Source:HGNC Symbol;Acc:HGNC:25514]
ENSG00000116903	0.415411864808185	8.98530269329564e-06	EXOC8	exocyst complex component 8 [Source:HGNC Symbol;Acc:HGNC:24659]
ENSG00000116918	0.594812902403299	0.00048961015902315	TSNAX	translin associated factor X [Source:HGNC Symbol;Acc:HGNC:12380]
ENSG00000116954	0.529839516087859	0.000156299914355855	RRAGC	Ras related GTP binding C [Source:HGNC Symbol;Acc:HGNC:19902]
ENSG00000116990	1.96667880838582	1.03307998952379e-10	MYCL	MYCL proto-oncogene, bHLH transcription factor [Source:HGNC Symbol;Acc:HGNC:7555]
ENSG00000117009	-2.09819871504723	1.11368703396325e-05	KMO	kynurenine 3-monooxygenase [Source:HGNC Symbol;Acc:HGNC:6381]
ENSG00000117036	0.487302946008976	7.28430339540647e-07	ETV3	ETS variant 3 [Source:HGNC Symbol;Acc:HGNC:3492]
ENSG00000117054	0.894811023533368	3.02656372408444e-14	ACADM	acyl-CoA dehydrogenase medium chain [Source:HGNC Symbol;Acc:HGNC:89]
ENSG00000117122	4.68360215687393	5.64769532947581e-07	MFAP2	microfibril associated protein 2 [Source:HGNC Symbol;Acc:HGNC:7033]
ENSG00000117133	0.708461122546529	1.09185519675446e-05	RPF1	ribosome production factor 1 homolog [Source:HGNC Symbol;Acc:HGNC:30350]
ENSG00000117139	0.90646850689202	7.03032364705435e-13	KDM5B	lysine demethylase 5B [Source:HGNC Symbol;Acc:HGNC:18039]
ENSG00000117151	0.76004670622351	1.08221851341842e-14	CTBS	chitobiase [Source:HGNC Symbol;Acc:HGNC:2496]
ENSG00000117153	0.318765733302296	0.000127878601372716	KLHL12	kelch like family member 12 [Source:HGNC Symbol;Acc:HGNC:19360]
ENSG00000117174	1.00961512436252	2.84487811624703e-06	ZNHIT6	zinc finger HIT-type containing 6 [Source:HGNC Symbol;Acc:HGNC:26089]
ENSG00000117226	1.75474745589928	9.86692174944366e-22	GBP3	guanylate binding protein 3 [Source:HGNC Symbol;Acc:HGNC:4184]
ENSG00000117228	1.16328737607196	1.88736005671998e-14	GBP1	guanylate binding protein 1 [Source:HGNC Symbol;Acc:HGNC:4182]
ENSG00000117280	0.855055304827163	8.89866861026722e-19	RAB29	RAB29, member RAS oncogene family [Source:HGNC Symbol;Acc:HGNC:9789]
ENSG00000117305	0.734450912888733	9.1984463055087e-07	HMGCL	3-hydroxy-3-methylglutaryl-CoA lyase [Source:HGNC Symbol;Acc:HGNC:5005]
ENSG00000117394	-3.10234865079354	1.24708775053805e-32	SLC2A1	solute carrier family 2 member 1 [Source:HGNC Symbol;Acc:HGNC:11005]
ENSG00000117407	-2.38595741171341	2.84573606488504e-21	ARTN	artemin [Source:HGNC Symbol;Acc:HGNC:727]
ENSG00000117411	-1.07370803342943	3.09758990447881e-29	B4GALT2	beta-1,4-galactosyltransferase 2 [Source:HGNC Symbol;Acc:HGNC:925]
ENSG00000117448	0.432412928867147	4.20351962249794e-06	AKR1A1	aldo-keto reductase family 1 member A1 [Source:HGNC Symbol;Acc:HGNC:380]
ENSG00000117461	1.23575190648707	6.02871728315825e-07	PIK3R3	phosphoinositide-3-kinase regulatory subunit 3 [Source:HGNC Symbol;Acc:HGNC:8981]
ENSG00000117472	1.82916188675763	1.0307165533738e-24	TSPAN1	tetraspanin 1 [Source:HGNC Symbol;Acc:HGNC:20657]
ENSG00000117475	0.799337290410479	1.2853783688683e-12	BLZF1	basic leucine zipper nuclear factor 1 [Source:HGNC Symbol;Acc:HGNC:1065]
ENSG00000117477	-1.7253268627395	0.00015886431867935	CCDC181	coiled-coil domain containing 181 [Source:HGNC Symbol;Acc:HGNC:28051]
ENSG00000117479	0.651486780046812	0.000172276955786222	SLC19A2	solute carrier family 19 member 2 [Source:HGNC Symbol;Acc:HGNC:10938]
ENSG00000117519	-0.679768964123218	8.78500912028309e-06	CNN3	calponin 3 [Source:HGNC Symbol;Acc:HGNC:2157]
ENSG00000117525	-3.76176115769729	1.70584411116433e-29	F3	coagulation factor III, tissue factor [Source:HGNC Symbol;Acc:HGNC:3541]
ENSG00000117533	0.625543111643201	5.36133897528172e-07	VAMP4	vesicle associated membrane protein 4 [Source:HGNC Symbol;Acc:HGNC:12645]
ENSG00000117586	1.57206337139305	1.08589718854891e-05	TNFSF4	TNF superfamily member 4 [Source:HGNC Symbol;Acc:HGNC:11934]
ENSG00000117592	0.504327856617399	4.56116434624945e-08	PRDX6	peroxiredoxin 6 [Source:HGNC Symbol;Acc:HGNC:16753]
ENSG00000117862	1.3324776780208	6.6607691328507e-06	TXNDC12	thioredoxin domain containing 12 [Source:HGNC Symbol;Acc:HGNC:24626]
ENSG00000117868	-0.758816472000957	2.78579069607456e-06	ESYT2	extended synaptotagmin 2 [Source:HGNC Symbol;Acc:HGNC:22211]
ENSG00000117877	-1.2487331552147	1.01137356324193e-18	CD3EAP	CD3e molecule associated protein [Source:HGNC Symbol;Acc:HGNC:24219]
ENSG00000117899	-0.544599076591139	1.86030517994381e-05	MESD	mesoderm development LRP chaperone [Source:HGNC Symbol;Acc:HGNC:13520]
ENSG00000117984	-0.613465910857929	3.72099640740607e-10	CTSD	cathepsin D [Source:HGNC Symbol;Acc:HGNC:2529]
ENSG00000118007	-0.533734038158396	4.34116278204613e-06	STAG1	stromal antigen 1 [Source:HGNC Symbol;Acc:HGNC:11354]
ENSG00000118156	3.80527469861328	3.5882641304778e-06	ZNF541	zinc finger protein 541 [Source:HGNC Symbol;Acc:HGNC:25294]
ENSG00000118197	0.543423770358462	1.95817047133287e-07	DDX59	DEAD-box helicase 59 [Source:HGNC Symbol;Acc:HGNC:25360]
ENSG00000118217	1.05507910021165	3.00305732055725e-11	ATF6	activating transcription factor 6 [Source:HGNC Symbol;Acc:HGNC:791]
ENSG00000118246	0.38806122474926	0.00039506249489115	FASTKD2	FAST kinase domains 2 [Source:HGNC Symbol;Acc:HGNC:29160]
ENSG00000118307	1.51144486319156	0.000533660530967208	CASC1	cancer susceptibility 1 [Source:HGNC Symbol;Acc:HGNC:29599]
ENSG00000118454	0.561637834330723	1.65005351240919e-07	ANKRD13C	ankyrin repeat domain 13C [Source:HGNC Symbol;Acc:HGNC:25374]
ENSG00000118473	2.12326435863255	0.000978423953202602	SGIP1	SH3 domain GRB2 like endophilin interacting protein 1 [Source:HGNC Symbol;Acc:HGNC:25412]
ENSG00000118495	-1.20122070600367	2.30563623219777e-09	PLAGL1	PLAG1 like zinc finger 1 [Source:HGNC Symbol;Acc:HGNC:9046]
ENSG00000118508	-0.815388968916417	6.17019426506061e-08	RAB32	RAB32, member RAS oncogene family [Source:HGNC Symbol;Acc:HGNC:9772]
ENSG00000118655	-0.726154566521585	9.94911316736147e-05	DCLRE1B	DNA cross-link repair 1B [Source:HGNC Symbol;Acc:HGNC:17641]
ENSG00000118707	-0.851828953904058	2.81291396093304e-06	TGIF2	TGFB induced factor homeobox 2 [Source:HGNC Symbol;Acc:HGNC:15764]
ENSG00000118777	1.40843035952817	2.00943892465768e-07	ABCG2	ATP binding cassette subfamily G member 2 (Junior blood group) [Source:HGNC Symbol;Acc:HGNC:74]
ENSG00000118785	0.794762159409884	9.33896459746032e-07	SPP1	secreted phosphoprotein 1 [Source:HGNC Symbol;Acc:HGNC:11255]
ENSG00000118804	-0.953408531152663	1.2904036274551e-06	STBD1	starch binding domain 1 [Source:HGNC Symbol;Acc:HGNC:24854]
ENSG00000118816	-0.345890745317542	0.000706116889505124	CCNI	cyclin I [Source:HGNC Symbol;Acc:HGNC:1595]
ENSG00000118898	3.41052884036961	1.60318960113756e-06	PPL	periplakin [Source:HGNC Symbol;Acc:HGNC:9273]
ENSG00000118965	0.595682037600111	0.000738368227952944	WDR35	WD repeat domain 35 [Source:HGNC Symbol;Acc:HGNC:29250]
ENSG00000119041	0.466281594136827	0.000179831093514507	GTF3C3	general transcription factor IIIC subunit 3 [Source:HGNC Symbol;Acc:HGNC:4666]
ENSG00000119138	0.735472193870718	4.85381430887709e-10	KLF9	Kruppel like factor 9 [Source:HGNC Symbol;Acc:HGNC:1123]
ENSG00000119185	-0.685520046588076	1.0119127625283e-06	ITGB1BP1	integrin subunit beta 1 binding protein 1 [Source:HGNC Symbol;Acc:HGNC:23927]
ENSG00000119227	-1.00150751532182	2.02556541661444e-05	PIGZ	phosphatidylinositol glycan anchor biosynthesis class Z [Source:HGNC Symbol;Acc:HGNC:30596]
ENSG00000119242	-0.44427040758371	0.000160361561277631	CCDC92	coiled-coil domain containing 92 [Source:HGNC Symbol;Acc:HGNC:29563]
ENSG00000119280	-0.425059303112754	0.000158421344028221	C1orf198	chromosome 1 open reading frame 198 [Source:HGNC Symbol;Acc:HGNC:25900]
ENSG00000119333	-0.75322054644459	3.99150790698101e-06	WDR34	WD repeat domain 34 [Source:HGNC Symbol;Acc:HGNC:28296]
ENSG00000119392	-0.466841402792843	1.85239504113711e-06	GLE1	GLE1 RNA export mediator [Source:HGNC Symbol;Acc:HGNC:4315]
ENSG00000119408	-1.68974303978921	2.70680163405383e-12	NEK6	NIMA related kinase 6 [Source:HGNC Symbol;Acc:HGNC:7749]
ENSG00000119514	0.870271003754091	2.71321820800808e-07	GALNT12	polypeptide N-acetylgalactosaminyltransferase 12 [Source:HGNC Symbol;Acc:HGNC:19877]
ENSG00000119574	-0.975070500705302	5.14345269527868e-05	ZBTB45	zinc finger and BTB domain containing 45 [Source:HGNC Symbol;Acc:HGNC:23715]
ENSG00000119596	-0.562646148610239	7.12389206003307e-05	YLPM1	YLP motif containing 1 [Source:HGNC Symbol;Acc:HGNC:17798]
ENSG00000119630	-3.25661490512684	6.99729782104809e-06	PGF	placental growth factor [Source:HGNC Symbol;Acc:HGNC:8893]
ENSG00000119636	-0.748347644296982	4.21103113871428e-06	BBOF1	basal body orientation factor 1 [Source:HGNC Symbol;Acc:HGNC:19855]
ENSG00000119655	-1.06734585082782	3.69283290385472e-34	NPC2	NPC intracellular cholesterol transporter 2 [Source:HGNC Symbol;Acc:HGNC:14537]
ENSG00000119685	-1.10585295954036	6.77474723250574e-08	TTLL5	tubulin tyrosine ligase like 5 [Source:HGNC Symbol;Acc:HGNC:19963]
ENSG00000119688	-0.383790367232142	0.000124513906558235	ABCD4	ATP binding cassette subfamily D member 4 [Source:HGNC Symbol;Acc:HGNC:68]
ENSG00000119689	-0.884614678038363	1.34274658923724e-20	DLST	dihydrolipoamide S-succinyltransferase [Source:HGNC Symbol;Acc:HGNC:2911]
ENSG00000119699	-1.12253517938948	1.59935382596305e-05	TGFB3	transforming growth factor beta 3 [Source:HGNC Symbol;Acc:HGNC:11769]
ENSG00000119760	0.645340159982502	4.7181593424674e-07	SUPT7L	SPT7 like, STAGA complex gamma subunit [Source:HGNC Symbol;Acc:HGNC:30632]
ENSG00000119771	1.03391957456326	0.000672762658322697	KLHL29	kelch like family member 29 [Source:HGNC Symbol;Acc:HGNC:29404]
ENSG00000119801	0.359378417288407	0.000434334340277354	YPEL5	yippee like 5 [Source:HGNC Symbol;Acc:HGNC:18329]
ENSG00000119820	0.889171902927072	0.000392591859033122	YIPF4	Yip1 domain family member 4 [Source:HGNC Symbol;Acc:HGNC:28145]
ENSG00000119865	-0.835644199677989	8.61226165181012e-10	CNRIP1	cannabinoid receptor interacting protein 1 [Source:HGNC Symbol;Acc:HGNC:24546]
ENSG00000119917	2.35676339017465	6.17494482284755e-21	IFIT3	interferon induced protein with tetratricopeptide repeats 3 [Source:HGNC Symbol;Acc:HGNC:5411]
ENSG00000119922	3.21477932977785	4.08329680185776e-24	IFIT2	interferon induced protein with tetratricopeptide repeats 2 [Source:HGNC Symbol;Acc:HGNC:5409]
ENSG00000119927	-0.444193898492352	6.51167168302601e-05	GPAM	glycerol-3-phosphate acyltransferase, mitochondrial [Source:HGNC Symbol;Acc:HGNC:24865]
ENSG00000119929	-0.424846982370613	0.000424188940778011	CUTC	cutC copper transporter [Source:HGNC Symbol;Acc:HGNC:24271]
ENSG00000119938	-1.19940249784204	7.62024117975243e-10	PPP1R3C	protein phosphatase 1 regulatory subunit 3C [Source:HGNC Symbol;Acc:HGNC:9293]
ENSG00000119969	-1.09796517099407	1.25766567985908e-06	HELLS	helicase, lymphoid specific [Source:HGNC Symbol;Acc:HGNC:4861]
ENSG00000119977	-0.597199658189489	2.41921283239432e-11	TCTN3	tectonic family member 3 [Source:HGNC Symbol;Acc:HGNC:24519]
ENSG00000120053	1.73419000154646	1.6602563207175e-09	GOT1	glutamic-oxaloacetic transaminase 1 [Source:HGNC Symbol;Acc:HGNC:4432]
ENSG00000120055	2.74254076680958	4.7377851545346e-07	C10orf95	chromosome 10 open reading frame 95 [Source:HGNC Symbol;Acc:HGNC:25880]
ENSG00000120129	-0.913638869084582	2.94320386683628e-11	DUSP1	dual specificity phosphatase 1 [Source:HGNC Symbol;Acc:HGNC:3064]
ENSG00000120253	-0.425227750203079	0.000360975733576869	NUP43	nucleoporin 43 [Source:HGNC Symbol;Acc:HGNC:21182]
ENSG00000120256	-0.845264160466811	8.17067531580305e-08	LRP11	LDL receptor related protein 11 [Source:HGNC Symbol;Acc:HGNC:16936]
ENSG00000120314	-0.340877345817365	0.000109924485975659	WDR55	WD repeat domain 55 [Source:HGNC Symbol;Acc:HGNC:25971]
ENSG00000120334	0.525171661170898	3.79250161229749e-05	CENPL	centromere protein L [Source:HGNC Symbol;Acc:HGNC:17879]
ENSG00000120341	1.24040277116974	5.88891674272747e-08	SEC16B	SEC16 homolog B, endoplasmic reticulum export factor [Source:HGNC Symbol;Acc:HGNC:30301]
ENSG00000120370	1.34029725560555	1.15658318927501e-15	GORAB	golgin, RAB6 interacting [Source:HGNC Symbol;Acc:HGNC:25676]
ENSG00000120437	-0.779841485530259	6.64927176111789e-07	ACAT2	acetyl-CoA acetyltransferase 2 [Source:HGNC Symbol;Acc:HGNC:94]
ENSG00000120438	-0.637138217465692	2.08676444410043e-11	TCP1	t-complex 1 [Source:HGNC Symbol;Acc:HGNC:11655]
ENSG00000120539	-0.629067367865867	0.000586218088837201	MASTL	microtubule associated serine/threonine kinase like [Source:HGNC Symbol;Acc:HGNC:19042]
ENSG00000120658	-2.058960820974	0.000120151047069712	ENOX1	ecto-NOX disulfide-thiol exchanger 1 [Source:HGNC Symbol;Acc:HGNC:25474]
ENSG00000120694	-0.862620922270412	2.5844296280496e-07	HSPH1	heat shock protein family H (Hsp110) member 1 [Source:HGNC Symbol;Acc:HGNC:16969]
ENSG00000120708	-1.17207231248531	4.21054219247092e-33	TGFBI	transforming growth factor beta induced [Source:HGNC Symbol;Acc:HGNC:11771]
ENSG00000120733	-0.533103652919573	0.000161753835631338	KDM3B	lysine demethylase 3B [Source:HGNC Symbol;Acc:HGNC:1337]
ENSG00000120738	2.63161186122973	1.33624423821669e-17	EGR1	early growth response 1 [Source:HGNC Symbol;Acc:HGNC:3238]
ENSG00000120784	-0.677044723498003	8.87306290552571e-06	ZFP30	ZFP30 zinc finger protein [Source:HGNC Symbol;Acc:HGNC:29555]
ENSG00000120820	1.26554626931711	1.33897650162321e-08	GLT8D2	glycosyltransferase 8 domain containing 2 [Source:HGNC Symbol;Acc:HGNC:24890]
ENSG00000120833	3.1856632153752	8.09538295222964e-19	SOCS2	suppressor of cytokine signaling 2 [Source:HGNC Symbol;Acc:HGNC:19382]
ENSG00000120875	0.830017286204457	0.000136214442495982	DUSP4	dual specificity phosphatase 4 [Source:HGNC Symbol;Acc:HGNC:3070]
ENSG00000120885	1.48223387966485	1.10724904471254e-58	CLU	clusterin [Source:HGNC Symbol;Acc:HGNC:2095]
ENSG00000120889	0.651102973794904	0.00051356457852868	TNFRSF10B	TNF receptor superfamily member 10b [Source:HGNC Symbol;Acc:HGNC:11905]
ENSG00000120896	-1.05263810264192	9.98556241188086e-12	SORBS3	sorbin and SH3 domain containing 3 [Source:HGNC Symbol;Acc:HGNC:30907]
ENSG00000120913	-1.30559344859191	8.66111897192387e-12	PDLIM2	PDZ and LIM domain 2 [Source:HGNC Symbol;Acc:HGNC:13992]
ENSG00000120915	1.22629669349206	1.86463083471515e-08	EPHX2	epoxide hydrolase 2 [Source:HGNC Symbol;Acc:HGNC:3402]
ENSG00000120948	-0.54992879920844	3.44938018505672e-05	TARDBP	TAR DNA binding protein [Source:HGNC Symbol;Acc:HGNC:11571]
ENSG00000121060	1.53916752268467	1.76935295131523e-06	TRIM25	tripartite motif containing 25 [Source:HGNC Symbol;Acc:HGNC:12932]
ENSG00000121064	0.49768408349979	1.3854143341952e-05	SCPEP1	serine carboxypeptidase 1 [Source:HGNC Symbol;Acc:HGNC:29507]
ENSG00000121068	-0.832227407437569	1.10845531424199e-05	TBX2	T-box transcription factor 2 [Source:HGNC Symbol;Acc:HGNC:11597]
ENSG00000121289	-0.603418888196697	4.10453521491757e-07	CEP89	centrosomal protein 89 [Source:HGNC Symbol;Acc:HGNC:25907]
ENSG00000121297	-1.16214556928014	5.03300112192807e-14	TSHZ3	teashirt zinc finger homeobox 3 [Source:HGNC Symbol;Acc:HGNC:30700]
ENSG00000121310	0.374374233095177	0.00014197264101578	ECHDC2	enoyl-CoA hydratase domain containing 2 [Source:HGNC Symbol;Acc:HGNC:23408]
ENSG00000121350	1.18680009252334	3.92690221514069e-09	PYROXD1	pyridine nucleotide-disulphide oxidoreductase domain 1 [Source:HGNC Symbol;Acc:HGNC:26162]
ENSG00000121486	0.57337978292888	0.000103307111318964	TRMT1L	tRNA methyltransferase 1 like [Source:HGNC Symbol;Acc:HGNC:16782]
ENSG00000121552	6.02855413834598	9.66241469975002e-05	CSTA	cystatin A [Source:HGNC Symbol;Acc:HGNC:2481]
ENSG00000121644	0.479658590543362	5.62904384428868e-05	DESI2	desumoylating isopeptidase 2 [Source:HGNC Symbol;Acc:HGNC:24264]
ENSG00000121749	0.810982932257809	3.36424617220939e-07	TBC1D15	TBC1 domain family member 15 [Source:HGNC Symbol;Acc:HGNC:25694]
ENSG00000121797	1.42265380750226	9.86354970017643e-07	CCRL2	C-C motif chemokine receptor like 2 [Source:HGNC Symbol;Acc:HGNC:1612]
ENSG00000121858	-3.05118993800499	7.52092231977257e-22	TNFSF10	TNF superfamily member 10 [Source:HGNC Symbol;Acc:HGNC:11925]
ENSG00000121892	-0.391599352710542	0.00060610759811687	PDS5A	PDS5 cohesin associated factor A [Source:HGNC Symbol;Acc:HGNC:29088]
ENSG00000121966	-7.2106304422514	0.000234037003304086	CXCR4	C-X-C motif chemokine receptor 4 [Source:HGNC Symbol;Acc:HGNC:2561]
ENSG00000122133	1.59220109411992	8.2461796361289e-06	PAEP	progestagen associated endometrial protein [Source:HGNC Symbol;Acc:HGNC:8573]
ENSG00000122140	-0.703858480086613	2.98404780612628e-10	MRPS2	mitochondrial ribosomal protein S2 [Source:HGNC Symbol;Acc:HGNC:14495]
ENSG00000122176	2.39512648649755	1.64206314919708e-11	FMOD	fibromodulin [Source:HGNC Symbol;Acc:HGNC:3774]
ENSG00000122218	0.760851869041547	4.81239312624027e-08	COPA	coatomer protein complex subunit alpha [Source:HGNC Symbol;Acc:HGNC:2230]
ENSG00000122378	-2.70161213122644	1.73736685599939e-33	PRXL2A	peroxiredoxin like 2A [Source:HGNC Symbol;Acc:HGNC:28651]
ENSG00000122417	1.36557399835087	1.05708453808295e-56	ODF2L	outer dense fiber of sperm tails 2 like [Source:HGNC Symbol;Acc:HGNC:29225]
ENSG00000122482	0.932662760991871	9.31732912109685e-15	ZNF644	zinc finger protein 644 [Source:HGNC Symbol;Acc:HGNC:29222]
ENSG00000122490	-0.93912756381528	1.4974557985312e-17	SLC66A2	solute carrier family 66 member 2 [Source:HGNC Symbol;Acc:HGNC:26188]
ENSG00000122545	-0.58481647626453	2.44588317024061e-06	SEPTIN7	septin 7 [Source:HGNC Symbol;Acc:HGNC:1717]
ENSG00000122557	-0.402621603709429	0.000516749319274505	HERPUD2	HERPUD family member 2 [Source:HGNC Symbol;Acc:HGNC:21915]
ENSG00000122566	-0.598886058662389	3.61583059078783e-05	HNRNPA2B1	heterogeneous nuclear ribonucleoprotein A2/B1 [Source:HGNC Symbol;Acc:HGNC:5033]
ENSG00000122644	-0.59066759622196	3.09573512101488e-07	ARL4A	ADP ribosylation factor like GTPase 4A [Source:HGNC Symbol;Acc:HGNC:695]
ENSG00000122674	0.426092937602606	0.000349900039686848	CCZ1	CCZ1 homolog, vacuolar protein trafficking and biogenesis associated [Source:HGNC Symbol;Acc:HGNC:21691]
ENSG00000122678	-0.503343598751452	1.50652459799446e-05	POLM	DNA polymerase mu [Source:HGNC Symbol;Acc:HGNC:9185]
ENSG00000122687	-0.439461042872472	2.53600530733049e-05	MRM2	mitochondrial rRNA methyltransferase 2 [Source:HGNC Symbol;Acc:HGNC:16352]
ENSG00000122694	-1.11751485577147	7.47804073437633e-16	GLIPR2	GLI pathogenesis related 2 [Source:HGNC Symbol;Acc:HGNC:18007]
ENSG00000122707	-0.495441936140545	0.000810732584425525	RECK	reversion inducing cysteine rich protein with kazal motifs [Source:HGNC Symbol;Acc:HGNC:11345]
ENSG00000122729	-0.523505562322628	3.45423310022624e-05	ACO1	aconitase 1 [Source:HGNC Symbol;Acc:HGNC:117]
ENSG00000122779	-0.846801437918136	3.32926979984124e-06	TRIM24	tripartite motif containing 24 [Source:HGNC Symbol;Acc:HGNC:11812]
ENSG00000122861	1.21499737762607	0.000164983333265992	PLAU	plasminogen activator, urokinase [Source:HGNC Symbol;Acc:HGNC:9052]
ENSG00000122863	-1.45923175620807	4.79565001497476e-51	CHST3	carbohydrate sulfotransferase 3 [Source:HGNC Symbol;Acc:HGNC:1971]
ENSG00000122870	-0.793840137897678	7.47913519222118e-12	BICC1	BicC family RNA binding protein 1 [Source:HGNC Symbol;Acc:HGNC:19351]
ENSG00000122884	-1.24757237330359	3.6982283916134e-15	P4HA1	prolyl 4-hydroxylase subunit alpha 1 [Source:HGNC Symbol;Acc:HGNC:8546]
ENSG00000122952	-0.899481729515007	4.13275748295098e-08	ZWINT	ZW10 interacting kinetochore protein [Source:HGNC Symbol;Acc:HGNC:13195]
ENSG00000123064	-1.15796059200593	2.01029796824744e-09	DDX54	DEAD-box helicase 54 [Source:HGNC Symbol;Acc:HGNC:20084]
ENSG00000123080	-1.39406130060098	1.34191370988343e-05	CDKN2C	cyclin dependent kinase inhibitor 2C [Source:HGNC Symbol;Acc:HGNC:1789]
ENSG00000123106	0.953466945866434	1.02703590572267e-05	CCDC91	coiled-coil domain containing 91 [Source:HGNC Symbol;Acc:HGNC:24855]
ENSG00000123178	-0.740947228265989	6.92011660108714e-11	SPRYD7	SPRY domain containing 7 [Source:HGNC Symbol;Acc:HGNC:14297]
ENSG00000123191	-0.740473098350759	0.000116203421292425	ATP7B	ATPase copper transporting beta [Source:HGNC Symbol;Acc:HGNC:870]
ENSG00000123268	0.625890492932825	0.000850531119818212	ATF1	activating transcription factor 1 [Source:HGNC Symbol;Acc:HGNC:783]
ENSG00000123329	3.87082485265101	8.35968496168353e-05	ARHGAP9	Rho GTPase activating protein 9 [Source:HGNC Symbol;Acc:HGNC:14130]
ENSG00000123416	-0.577033930302026	0.000254164985478469	TUBA1B	tubulin alpha 1b [Source:HGNC Symbol;Acc:HGNC:18809]
ENSG00000123453	-1.25396314673528	1.0816228118453e-12	SARDH	sarcosine dehydrogenase [Source:HGNC Symbol;Acc:HGNC:10536]
ENSG00000123496	3.94658877439192	8.03347706470426e-14	IL13RA2	interleukin 13 receptor subunit alpha 2 [Source:HGNC Symbol;Acc:HGNC:5975]
ENSG00000123562	-0.542088514582313	0.000880283847085669	MORF4L2	mortality factor 4 like 2 [Source:HGNC Symbol;Acc:HGNC:16849]
ENSG00000123570	-0.917562025469282	9.86616977837239e-05	RAB9B	RAB9B, member RAS oncogene family [Source:HGNC Symbol;Acc:HGNC:14090]
ENSG00000123575	-0.60044716303685	0.000943749814442619	FAM199X	family with sequence similarity 199, X-linked [Source:HGNC Symbol;Acc:HGNC:25195]
ENSG00000123609	1.24233625835955	4.75849506202096e-18	NMI	N-myc and STAT interactor [Source:HGNC Symbol;Acc:HGNC:7854]
ENSG00000123610	-1.25231721022486	1.06062703449784e-07	TNFAIP6	TNF alpha induced protein 6 [Source:HGNC Symbol;Acc:HGNC:11898]
ENSG00000123636	1.07811553609633	7.21501466934606e-06	BAZ2B	bromodomain adjacent to zinc finger domain 2B [Source:HGNC Symbol;Acc:HGNC:963]
ENSG00000123689	1.63766958521096	3.32513738890451e-17	G0S2	G0/G1 switch 2 [Source:HGNC Symbol;Acc:HGNC:30229]
ENSG00000123700	2.06734595132751	6.72008894000016e-11	KCNJ2	potassium voltage-gated channel subfamily J member 2 [Source:HGNC Symbol;Acc:HGNC:6263]
ENSG00000123737	-0.403883167139406	0.000195617386058162	EXOSC9	exosome component 9 [Source:HGNC Symbol;Acc:HGNC:9137]
ENSG00000123836	1.1438954156394	1.8921881302033e-11	PFKFB2	6-phosphofructo-2-kinase/fructose-2,6-biphosphatase 2 [Source:HGNC Symbol;Acc:HGNC:8873]
ENSG00000123892	1.6418514347852	2.17324994169143e-12	RAB38	RAB38, member RAS oncogene family [Source:HGNC Symbol;Acc:HGNC:9776]
ENSG00000123908	-0.741905081900289	0.000298834413606758	AGO2	argonaute RISC catalytic component 2 [Source:HGNC Symbol;Acc:HGNC:3263]
ENSG00000123975	-0.727912732318532	0.000731125246598212	CKS2	CDC28 protein kinase regulatory subunit 2 [Source:HGNC Symbol;Acc:HGNC:2000]
ENSG00000123989	0.74271932697328	1.74179741485157e-11	CHPF	chondroitin polymerizing factor [Source:HGNC Symbol;Acc:HGNC:24291]
ENSG00000123992	0.526479323105438	0.000167284240987662	DNPEP	aspartyl aminopeptidase [Source:HGNC Symbol;Acc:HGNC:2981]
ENSG00000124067	-0.539983567220594	3.13509055047989e-06	SLC12A4	solute carrier family 12 member 4 [Source:HGNC Symbol;Acc:HGNC:10913]
ENSG00000124074	-0.367062744055034	0.000967325777936711	ENKD1	enkurin domain containing 1 [Source:HGNC Symbol;Acc:HGNC:25246]
ENSG00000124098	-0.672937870272534	3.54101339507798e-07	FAM210B	family with sequence similarity 210 member B [Source:HGNC Symbol;Acc:HGNC:16102]
ENSG00000124102	4.31578470201593	1.31314916409767e-05	PI3	peptidase inhibitor 3 [Source:HGNC Symbol;Acc:HGNC:8947]
ENSG00000124107	4.40620028634013	1.00302422117812e-06	SLPI	secretory leukocyte peptidase inhibitor [Source:HGNC Symbol;Acc:HGNC:11092]
ENSG00000124120	0.769883967207814	0.000943895650800235	TTPAL	alpha tocopherol transfer protein like [Source:HGNC Symbol;Acc:HGNC:16114]
ENSG00000124160	-0.494148523643587	3.18581630678408e-07	NCOA5	nuclear receptor coactivator 5 [Source:HGNC Symbol;Acc:HGNC:15909]
ENSG00000124164	-0.431037451936435	2.9464033846325e-05	VAPB	VAMP associated protein B and C [Source:HGNC Symbol;Acc:HGNC:12649]
ENSG00000124194	6.34633726846987	1.08422750775074e-21	GDAP1L1	ganglioside induced differentiation associated protein 1 like 1 [Source:HGNC Symbol;Acc:HGNC:4213]
ENSG00000124207	-0.638468283759981	1.339171803693e-11	CSE1L	chromosome segregation 1 like [Source:HGNC Symbol;Acc:HGNC:2431]
ENSG00000124214	-0.450935318958522	1.13622087700345e-06	STAU1	staufen double-stranded RNA binding protein 1 [Source:HGNC Symbol;Acc:HGNC:11370]
ENSG00000124216	-1.32680444638095	2.55851014257705e-07	SNAI1	snail family transcriptional repressor 1 [Source:HGNC Symbol;Acc:HGNC:11128]
ENSG00000124356	0.93119635979199	1.02536774066395e-10	STAMBP	STAM binding protein [Source:HGNC Symbol;Acc:HGNC:16950]
ENSG00000124374	-1.60813931183612	6.54950126794567e-20	PAIP2B	poly(A) binding protein interacting protein 2B [Source:HGNC Symbol;Acc:HGNC:29200]
ENSG00000124535	-0.483988325605961	9.05134665592327e-06	WRNIP1	WRN helicase interacting protein 1 [Source:HGNC Symbol;Acc:HGNC:20876]
ENSG00000124564	1.46289642647595	5.33535780663969e-17	SLC17A3	solute carrier family 17 member 3 [Source:HGNC Symbol;Acc:HGNC:10931]
ENSG00000124568	1.74959062087937	6.75095189796311e-10	SLC17A1	solute carrier family 17 member 1 [Source:HGNC Symbol;Acc:HGNC:10929]
ENSG00000124608	-0.589727372072627	1.4689384239912e-06	AARS2	alanyl-tRNA synthetase 2, mitochondrial [Source:HGNC Symbol;Acc:HGNC:21022]
ENSG00000124615	-0.442173499020317	0.000940751684910868	MOCS1	molybdenum cofactor synthesis 1 [Source:HGNC Symbol;Acc:HGNC:7190]
ENSG00000124733	-0.598459170213372	1.82943150208276e-05	MEA1	male-enhanced antigen 1 [Source:HGNC Symbol;Acc:HGNC:6986]
ENSG00000124762	1.30211595421758	1.31796977401958e-35	CDKN1A	cyclin dependent kinase inhibitor 1A [Source:HGNC Symbol;Acc:HGNC:1784]
ENSG00000124772	1.18601367349031	0.00096376981151215	CPNE5	copine 5 [Source:HGNC Symbol;Acc:HGNC:2318]
ENSG00000124783	-0.446715876800665	2.57198084394367e-05	SSR1	signal sequence receptor subunit 1 [Source:HGNC Symbol;Acc:HGNC:11323]
ENSG00000124788	0.808199710553547	6.25600205009179e-11	ATXN1	ataxin 1 [Source:HGNC Symbol;Acc:HGNC:10548]
ENSG00000124789	-0.662413589265392	6.35503093623613e-07	NUP153	nucleoporin 153 [Source:HGNC Symbol;Acc:HGNC:8062]
ENSG00000124795	-0.604217208200734	3.02863634701991e-15	DEK	DEK proto-oncogene [Source:HGNC Symbol;Acc:HGNC:2768]
ENSG00000124882	2.44337435451148	1.37943047465408e-05	EREG	epiregulin [Source:HGNC Symbol;Acc:HGNC:3443]
ENSG00000124920	-1.54468601833218	1.3641614143998e-10	MYRF	myelin regulatory factor [Source:HGNC Symbol;Acc:HGNC:1181]
ENSG00000124942	-1.31681037360493	6.79684286141216e-14	AHNAK	AHNAK nucleoprotein [Source:HGNC Symbol;Acc:HGNC:347]
ENSG00000125122	1.67623801305489	1.1975371531131e-09	LRRC29	leucine rich repeat containing 29 [Source:HGNC Symbol;Acc:HGNC:13605]
ENSG00000125124	0.746095532837456	3.71841162350782e-07	BBS2	Bardet-Biedl syndrome 2 [Source:HGNC Symbol;Acc:HGNC:967]
ENSG00000125166	-0.326887351309521	0.00093183040073009	GOT2	glutamic-oxaloacetic transaminase 2 [Source:HGNC Symbol;Acc:HGNC:4433]
ENSG00000125246	-0.766590782424992	3.57344241713048e-05	CLYBL	citrate lyase beta like [Source:HGNC Symbol;Acc:HGNC:18355]
ENSG00000125247	-0.838743344918901	3.19360347554004e-05	TMTC4	transmembrane O-mannosyltransferase targeting cadherins 4 [Source:HGNC Symbol;Acc:HGNC:25904]
ENSG00000125249	-0.681608114959132	9.50143971137343e-05	RAP2A	RAP2A, member of RAS oncogene family [Source:HGNC Symbol;Acc:HGNC:9861]
ENSG00000125266	0.580922424471534	2.52854039095611e-06	EFNB2	ephrin B2 [Source:HGNC Symbol;Acc:HGNC:3227]
ENSG00000125347	1.23420897664137	4.5140367775303e-06	IRF1	interferon regulatory factor 1 [Source:HGNC Symbol;Acc:HGNC:6116]
ENSG00000125450	-0.526694590801261	0.000684433093928799	NUP85	nucleoporin 85 [Source:HGNC Symbol;Acc:HGNC:8734]
ENSG00000125503	-0.523748832193099	3.14546924662858e-05	PPP1R12C	protein phosphatase 1 regulatory subunit 12C [Source:HGNC Symbol;Acc:HGNC:14947]
ENSG00000125505	-1.02790499204208	5.18311244470807e-07	MBOAT7	membrane bound O-acyltransferase domain containing 7 [Source:HGNC Symbol;Acc:HGNC:15505]
ENSG00000125520	-1.11700089461697	5.10814184895736e-13	SLC2A4RG	SLC2A4 regulator [Source:HGNC Symbol;Acc:HGNC:15930]
ENSG00000125534	-1.28901223961766	2.16509992460356e-13	PPDPF	pancreatic progenitor cell differentiation and proliferation factor [Source:HGNC Symbol;Acc:HGNC:16142]
ENSG00000125538	2.54366199367216	1.89122510246771e-05	IL1B	interleukin 1 beta [Source:HGNC Symbol;Acc:HGNC:5992]
ENSG00000125611	0.411636382094054	0.000842653432413349	CHCHD5	coiled-coil-helix-coiled-coil-helix domain containing 5 [Source:HGNC Symbol;Acc:HGNC:17840]
ENSG00000125618	-0.883051592259388	0.000901582227344284	PAX8	paired box 8 [Source:HGNC Symbol;Acc:HGNC:8622]
ENSG00000125657	0.786307976133693	2.28733206186436e-05	TNFSF9	TNF superfamily member 9 [Source:HGNC Symbol;Acc:HGNC:11939]
ENSG00000125730	3.70585973969041	5.99437153133839e-27	C3	complement C3 [Source:HGNC Symbol;Acc:HGNC:1318]
ENSG00000125731	1.89600327699451	6.80921426175879e-15	SH2D3A	SH2 domain containing 3A [Source:HGNC Symbol;Acc:HGNC:16885]
ENSG00000125740	1.30010700992974	0.000128594868551197	FOSB	FosB proto-oncogene, AP-1 transcription factor subunit [Source:HGNC Symbol;Acc:HGNC:3797]
ENSG00000125812	0.879247967209928	5.94079814961402e-05	GZF1	GDNF inducible zinc finger protein 1 [Source:HGNC Symbol;Acc:HGNC:15808]
ENSG00000125817	-1.02346716492514	4.87678461331905e-14	CENPB	centromere protein B [Source:HGNC Symbol;Acc:HGNC:1852]
ENSG00000125818	-0.404113061130961	0.000207123382320409	PSMF1	proteasome inhibitor subunit 1 [Source:HGNC Symbol;Acc:HGNC:9571]
ENSG00000125834	-0.452006046899882	0.000662693643009924	STK35	serine/threonine kinase 35 [Source:HGNC Symbol;Acc:HGNC:16254]
ENSG00000125835	-0.536179745121232	0.000311677968129353	SNRPB	small nuclear ribonucleoprotein polypeptides B and B1 [Source:HGNC Symbol;Acc:HGNC:11153]
ENSG00000125841	-0.966034066031501	3.46091709673151e-09	NRSN2	neurensin 2 [Source:HGNC Symbol;Acc:HGNC:16229]
ENSG00000125843	-0.46758297075036	3.6551500326161e-05	AP5S1	adaptor related protein complex 5 subunit sigma 1 [Source:HGNC Symbol;Acc:HGNC:15875]
ENSG00000125845	0.916979470282833	9.89871199702357e-05	BMP2	bone morphogenetic protein 2 [Source:HGNC Symbol;Acc:HGNC:1069]
ENSG00000125864	1.46433515445019	1.47756552158635e-12	BFSP1	beaded filament structural protein 1 [Source:HGNC Symbol;Acc:HGNC:1040]
ENSG00000125868	-0.445560604507216	9.06516291687845e-05	DSTN	destrin, actin depolymerizing factor [Source:HGNC Symbol;Acc:HGNC:15750]
ENSG00000125872	-1.3421149774105	3.76718738531059e-07	LRRN4	leucine rich repeat neuronal 4 [Source:HGNC Symbol;Acc:HGNC:16208]
ENSG00000125885	-0.509291816745627	3.18645315673836e-06	MCM8	minichromosome maintenance 8 homologous recombination repair factor [Source:HGNC Symbol;Acc:HGNC:16147]
ENSG00000125898	-1.16883074316735	2.42234029618142e-09	FAM110A	family with sequence similarity 110 member A [Source:HGNC Symbol;Acc:HGNC:16188]
ENSG00000125901	-0.963519391561256	4.00932481063868e-07	MRPS26	mitochondrial ribosomal protein S26 [Source:HGNC Symbol;Acc:HGNC:14045]
ENSG00000125912	-0.508076258773151	1.30604364440099e-07	NCLN	nicalin [Source:HGNC Symbol;Acc:HGNC:26923]
ENSG00000125962	0.472433761092822	0.000178481506579651	ARMCX5	armadillo repeat containing X-linked 5 [Source:HGNC Symbol;Acc:HGNC:25772]
ENSG00000125966	-0.455305067961136	0.000121033312912381	MMP24	matrix metallopeptidase 24 [Source:HGNC Symbol;Acc:HGNC:7172]
ENSG00000125967	-0.726524536251681	2.89154408260983e-06	NECAB3	N-terminal EF-hand calcium binding protein 3 [Source:HGNC Symbol;Acc:HGNC:15851]
ENSG00000125970	-0.565615420614284	2.0249331912903e-09	RALY	RALY heterogeneous nuclear ribonucleoprotein [Source:HGNC Symbol;Acc:HGNC:15921]
ENSG00000126001	-0.64761058794031	1.20742205419673e-05	CEP250	centrosomal protein 250 [Source:HGNC Symbol;Acc:HGNC:1859]
ENSG00000126214	-0.463696924223509	8.08601479471561e-05	KLC1	kinesin light chain 1 [Source:HGNC Symbol;Acc:HGNC:6387]
ENSG00000126215	-0.786293029075656	3.17280494069572e-10	XRCC3	X-ray repair cross complementing 3 [Source:HGNC Symbol;Acc:HGNC:12830]
ENSG00000126216	-0.507115819191315	8.55443111068431e-07	TUBGCP3	tubulin gamma complex associated protein 3 [Source:HGNC Symbol;Acc:HGNC:18598]
ENSG00000126243	-0.979789358922894	9.89676137222122e-06	LRFN3	leucine rich repeat and fibronectin type III domain containing 3 [Source:HGNC Symbol;Acc:HGNC:28370]
ENSG00000126254	-0.545556382873868	2.0733297420021e-06	RBM42	RNA binding motif protein 42 [Source:HGNC Symbol;Acc:HGNC:28117]
ENSG00000126457	-0.442852533813476	3.42366738869997e-05	PRMT1	protein arginine methyltransferase 1 [Source:HGNC Symbol;Acc:HGNC:5187]
ENSG00000126458	-0.579413668856062	0.00018168427124166	RRAS	RAS related [Source:HGNC Symbol;Acc:HGNC:10447]
ENSG00000126461	-0.603564228137345	1.2808821555551e-07	SCAF1	SR-related CTD associated factor 1 [Source:HGNC Symbol;Acc:HGNC:30403]
ENSG00000126464	-0.60874910425512	0.000200827787192866	PRR12	proline rich 12 [Source:HGNC Symbol;Acc:HGNC:29217]
ENSG00000126500	5.9171523365648	1.41187436708993e-123	FLRT1	fibronectin leucine rich transmembrane protein 1 [Source:HGNC Symbol;Acc:HGNC:3760]
ENSG00000126562	1.79769658645899	1.10467852601518e-07	WNK4	WNK lysine deficient protein kinase 4 [Source:HGNC Symbol;Acc:HGNC:14544]
ENSG00000126705	-2.10979273137626	2.01924136272902e-09	AHDC1	AT-hook DNA binding motif containing 1 [Source:HGNC Symbol;Acc:HGNC:25230]
ENSG00000126709	1.6796026727629	3.12231145908701e-12	IFI6	interferon alpha inducible protein 6 [Source:HGNC Symbol;Acc:HGNC:4054]
ENSG00000126777	-0.541307615862195	1.50128518397491e-08	KTN1	kinectin 1 [Source:HGNC Symbol;Acc:HGNC:6467]
ENSG00000126778	0.828865015140599	8.01748376391153e-08	SIX1	SIX homeobox 1 [Source:HGNC Symbol;Acc:HGNC:10887]
ENSG00000126787	-0.848212213946667	1.95711437400891e-05	DLGAP5	DLG associated protein 5 [Source:HGNC Symbol;Acc:HGNC:16864]
ENSG00000126822	-1.34971253330274	8.28323333942526e-06	PLEKHG3	pleckstrin homology and RhoGEF domain containing G3 [Source:HGNC Symbol;Acc:HGNC:20364]
ENSG00000126870	-0.725232437096085	4.62965303138865e-08	WDR60	WD repeat domain 60 [Source:HGNC Symbol;Acc:HGNC:21862]
ENSG00000126903	-0.818691989145825	3.12483850568248e-12	SLC10A3	solute carrier family 10 member 3 [Source:HGNC Symbol;Acc:HGNC:22979]
ENSG00000127125	1.31522770847517	2.40496753275729e-20	PPCS	phosphopantothenoylcysteine synthetase [Source:HGNC Symbol;Acc:HGNC:25686]
ENSG00000127191	-0.854397865874048	5.95141514015015e-12	TRAF2	TNF receptor associated factor 2 [Source:HGNC Symbol;Acc:HGNC:12032]
ENSG00000127241	2.90963763530152	0.000643639263720706	MASP1	mannan binding lectin serine peptidase 1 [Source:HGNC Symbol;Acc:HGNC:6901]
ENSG00000127399	-1.00407214444616	3.0737547407715e-16	LRRC61	leucine rich repeat containing 61 [Source:HGNC Symbol;Acc:HGNC:21704]
ENSG00000127418	-1.43100281536351	3.81802998093151e-15	FGFRL1	fibroblast growth factor receptor like 1 [Source:HGNC Symbol;Acc:HGNC:3693]
ENSG00000127564	-1.34286834820433	1.83457983094068e-09	PKMYT1	protein kinase, membrane associated tyrosine/threonine 1 [Source:HGNC Symbol;Acc:HGNC:29650]
ENSG00000127586	-0.892170946895299	1.19569886091278e-07	CHTF18	chromosome transmission fidelity factor 18 [Source:HGNC Symbol;Acc:HGNC:18435]
ENSG00000127616	-0.476734192004734	1.58456691691106e-05	SMARCA4	SWI/SNF related, matrix associated, actin dependent regulator of chromatin, subfamily a, member 4 [Source:HGNC Symbol;Acc:HGNC:11100]
ENSG00000127774	-0.51804933903257	0.000219051349040794	EMC6	ER membrane protein complex subunit 6 [Source:HGNC Symbol;Acc:HGNC:28430]
ENSG00000127804	-0.725525466338637	5.60463284686824e-12	METTL16	methyltransferase like 16 [Source:HGNC Symbol;Acc:HGNC:28484]
ENSG00000128165	3.47030743952521	4.51214220659021e-187	ADM2	adrenomedullin 2 [Source:HGNC Symbol;Acc:HGNC:28898]
ENSG00000128185	-0.568356189392664	0.000127080743985496	DGCR6L	DiGeorge syndrome critical region gene 6 like [Source:HGNC Symbol;Acc:HGNC:18551]
ENSG00000128191	-0.415491569118226	0.000443515176645931	DGCR8	DGCR8 microprocessor complex subunit [Source:HGNC Symbol;Acc:HGNC:2847]
ENSG00000128203	2.21532626469186	2.87800918129773e-18	ASPHD2	aspartate beta-hydroxylase domain containing 2 [Source:HGNC Symbol;Acc:HGNC:30437]
ENSG00000128242	-3.57086319370153	3.23470625232709e-07	GAL3ST1	galactose-3-O-sulfotransferase 1 [Source:HGNC Symbol;Acc:HGNC:24240]
ENSG00000128245	-0.543830812441808	0.000417614832876366	YWHAH	tyrosine 3-monooxygenase/tryptophan 5-monooxygenase activation protein eta [Source:HGNC Symbol;Acc:HGNC:12853]
ENSG00000128284	2.58391780066822	8.22968551266111e-46	APOL3	apolipoprotein L3 [Source:HGNC Symbol;Acc:HGNC:14868]
ENSG00000128294	-0.989870867087986	9.33662841270191e-07	TPST2	tyrosylprotein sulfotransferase 2 [Source:HGNC Symbol;Acc:HGNC:12021]
ENSG00000128298	2.66140057201778	9.46052243685833e-45	BAIAP2L2	BAI1 associated protein 2 like 2 [Source:HGNC Symbol;Acc:HGNC:26203]
ENSG00000128335	-0.512415844084259	2.27684746308985e-06	APOL2	apolipoprotein L2 [Source:HGNC Symbol;Acc:HGNC:619]
ENSG00000128534	0.844570941589954	2.31967230958631e-06	LSM8	LSM8 homolog, U6 small nuclear RNA associated [Source:HGNC Symbol;Acc:HGNC:20471]
ENSG00000128564	1.26761695590687	0.000127599984799227	VGF	VGF nerve growth factor inducible [Source:HGNC Symbol;Acc:HGNC:12684]
ENSG00000128578	-0.515737940784533	0.00040995430630314	STRIP2	striatin interacting protein 2 [Source:HGNC Symbol;Acc:HGNC:22209]
ENSG00000128590	1.30761354012199	2.23218671625648e-07	DNAJB9	DnaJ heat shock protein family (Hsp40) member B9 [Source:HGNC Symbol;Acc:HGNC:6968]
ENSG00000128591	-0.994998669952962	1.07345708111736e-11	FLNC	filamin C [Source:HGNC Symbol;Acc:HGNC:3756]
ENSG00000128602	-1.58015266453881	5.62869162213217e-07	SMO	smoothened, frizzled class receptor [Source:HGNC Symbol;Acc:HGNC:11119]
ENSG00000128626	-0.55314668541764	5.26837744862454e-05	MRPS12	mitochondrial ribosomal protein S12 [Source:HGNC Symbol;Acc:HGNC:10380]
ENSG00000128645	1.14344199754524	1.51649457475541e-07	HOXD1	homeobox D1 [Source:HGNC Symbol;Acc:HGNC:5132]
ENSG00000128654	0.610979372714227	0.000679482004212266	MTX2	metaxin 2 [Source:HGNC Symbol;Acc:HGNC:7506]
ENSG00000128655	0.82805229536404	0.00064450310969807	PDE11A	phosphodiesterase 11A [Source:HGNC Symbol;Acc:HGNC:8773]
ENSG00000128699	0.770996788706357	1.48500283027491e-06	ORMDL1	ORMDL sphingolipid biosynthesis regulator 1 [Source:HGNC Symbol;Acc:HGNC:16036]
ENSG00000128791	-0.662701901506403	1.02249299951566e-05	TWSG1	twisted gastrulation BMP signaling modulator 1 [Source:HGNC Symbol;Acc:HGNC:12429]
ENSG00000128829	-0.668184730308909	1.49864523336153e-07	EIF2AK4	eukaryotic translation initiation factor 2 alpha kinase 4 [Source:HGNC Symbol;Acc:HGNC:19687]
ENSG00000128944	-0.415148213554553	0.000177574120687653	KNSTRN	kinetochore localized astrin (SPAG5) binding protein [Source:HGNC Symbol;Acc:HGNC:30767]
ENSG00000128951	-0.456126829976229	0.000352106297399334	DUT	deoxyuridine triphosphatase [Source:HGNC Symbol;Acc:HGNC:3078]
ENSG00000128965	2.91687972906645	4.84572583185961e-06	CHAC1	ChaC glutathione specific gamma-glutamylcyclotransferase 1 [Source:HGNC Symbol;Acc:HGNC:28680]
ENSG00000128973	-0.576686987773948	0.000578321899227635	CLN6	CLN6 transmembrane ER protein [Source:HGNC Symbol;Acc:HGNC:2077]
ENSG00000128989	-0.541932277601079	1.9897638468505e-07	ARPP19	cAMP regulated phosphoprotein 19 [Source:HGNC Symbol;Acc:HGNC:16967]
ENSG00000129170	-2.21587650258819	5.32266051730998e-07	CSRP3	cysteine and glycine rich protein 3 [Source:HGNC Symbol;Acc:HGNC:2472]
ENSG00000129173	-1.79842772969103	5.82169501611526e-08	E2F8	E2F transcription factor 8 [Source:HGNC Symbol;Acc:HGNC:24727]
ENSG00000129195	-0.797011844941856	0.000270440539223412	PIMREG	PICALM interacting mitotic regulator [Source:HGNC Symbol;Acc:HGNC:25483]
ENSG00000129219	-0.904618731769394	1.21691163343848e-06	PLD2	phospholipase D2 [Source:HGNC Symbol;Acc:HGNC:9068]
ENSG00000129226	-0.774495703478083	1.4346190120404e-07	CD68	CD68 molecule [Source:HGNC Symbol;Acc:HGNC:1693]
ENSG00000129250	-1.02892832588847	2.76846297756714e-34	KIF1C	kinesin family member 1C [Source:HGNC Symbol;Acc:HGNC:6317]
ENSG00000129347	-0.369712989052371	0.000491263049753939	KRI1	KRI1 homolog [Source:HGNC Symbol;Acc:HGNC:25769]
ENSG00000129355	-0.748831275181726	0.000528123517752856	CDKN2D	cyclin dependent kinase inhibitor 2D [Source:HGNC Symbol;Acc:HGNC:1790]
ENSG00000129422	-2.24325108224406	3.32465330274195e-15	MTUS1	microtubule associated scaffold protein 1 [Source:HGNC Symbol;Acc:HGNC:29789]
ENSG00000129484	-0.376618735959063	0.000456310325995279	PARP2	poly(ADP-ribose) polymerase 2 [Source:HGNC Symbol;Acc:HGNC:272]
ENSG00000129493	-0.510760830157889	0.000310424805867022	HEATR5A	HEAT repeat containing 5A [Source:HGNC Symbol;Acc:HGNC:20276]
ENSG00000129515	-0.400002467354158	0.000593539053533479	SNX6	sorting nexin 6 [Source:HGNC Symbol;Acc:HGNC:14970]
ENSG00000129521	-6.37797928625046	1.78193998512917e-19	EGLN3	egl-9 family hypoxia inducible factor 3 [Source:HGNC Symbol;Acc:HGNC:14661]
ENSG00000129534	-1.09127643214432	1.13040529884644e-09	MIS18BP1	MIS18 binding protein 1 [Source:HGNC Symbol;Acc:HGNC:20190]
ENSG00000129559	-0.580317018030811	2.10445358248137e-05	NEDD8	NEDD8 ubiquitin like modifier [Source:HGNC Symbol;Acc:HGNC:7732]
ENSG00000129667	-0.636059485390328	0.000390685144399793	RHBDF2	rhomboid 5 homolog 2 [Source:HGNC Symbol;Acc:HGNC:20788]
ENSG00000129675	-1.19987288869322	2.49701244193623e-08	ARHGEF6	Rac/Cdc42 guanine nucleotide exchange factor 6 [Source:HGNC Symbol;Acc:HGNC:685]
ENSG00000129757	1.79916490377446	8.45609212832166e-06	CDKN1C	cyclin dependent kinase inhibitor 1C [Source:HGNC Symbol;Acc:HGNC:1786]
ENSG00000129910	1.83521851436779	0.000650939523691187	CDH15	cadherin 15 [Source:HGNC Symbol;Acc:HGNC:1754]
ENSG00000129968	-0.648794287075862	1.50297527827348e-05	ABHD17A	abhydrolase domain containing 17A [Source:HGNC Symbol;Acc:HGNC:28756]
ENSG00000130021	-0.668568637121378	1.50173304457841e-11	PUDP	pseudouridine 5'-phosphatase [Source:HGNC Symbol;Acc:HGNC:16818]
ENSG00000130024	-0.76700003938764	5.24503318221842e-07	PHF10	PHD finger protein 10 [Source:HGNC Symbol;Acc:HGNC:18250]
ENSG00000130038	-0.902196280463727	6.91994184605471e-16	CRACR2A	calcium release activated channel regulator 2A [Source:HGNC Symbol;Acc:HGNC:28657]
ENSG00000130066	1.78466311682356	8.89462866077533e-13	SAT1	spermidine/spermine N1-acetyltransferase 1 [Source:HGNC Symbol;Acc:HGNC:10540]
ENSG00000130158	0.456042305792214	0.000397364615138618	DOCK6	dedicator of cytokinesis 6 [Source:HGNC Symbol;Acc:HGNC:19189]
ENSG00000130173	5.3328071180185	3.14301775735278e-07	ANGPTL8	angiopoietin like 8 [Source:HGNC Symbol;Acc:HGNC:24933]
ENSG00000130176	3.61359913752496	1.67620609389788e-46	CNN1	calponin 1 [Source:HGNC Symbol;Acc:HGNC:2155]
ENSG00000130193	-1.58339199130266	2.14978815141541e-09	THEM6	thioesterase superfamily member 6 [Source:HGNC Symbol;Acc:HGNC:29656]
ENSG00000130203	1.47106811082284	3.31525812320631e-06	APOE	apolipoprotein E [Source:HGNC Symbol;Acc:HGNC:613]
ENSG00000130204	-0.763618462918785	5.67460664181627e-09	TOMM40	translocase of outer mitochondrial membrane 40 [Source:HGNC Symbol;Acc:HGNC:18001]
ENSG00000130222	1.83210573753435	9.15827562793895e-07	GADD45G	growth arrest and DNA damage inducible gamma [Source:HGNC Symbol;Acc:HGNC:4097]
ENSG00000130224	1.25093393952367	1.01344958717308e-25	LRCH2	leucine rich repeats and calponin homology domain containing 2 [Source:HGNC Symbol;Acc:HGNC:29292]
ENSG00000130299	-0.432224910549577	0.00020733421643554	GTPBP3	GTP binding protein 3, mitochondrial [Source:HGNC Symbol;Acc:HGNC:14880]
ENSG00000130309	-0.695305726219198	4.13611829196005e-05	COLGALT1	collagen beta(1-O)galactosyltransferase 1 [Source:HGNC Symbol;Acc:HGNC:26182]
ENSG00000130402	-1.12344203571065	2.36436475391562e-13	ACTN4	actinin alpha 4 [Source:HGNC Symbol;Acc:HGNC:166]
ENSG00000130487	7.7717203213427	2.94656579679588e-14	KLHDC7B	kelch domain containing 7B [Source:HGNC Symbol;Acc:HGNC:25145]
ENSG00000130511	-0.590625345579828	0.000616219837958312	SSBP4	single stranded DNA binding protein 4 [Source:HGNC Symbol;Acc:HGNC:15676]
ENSG00000130513	6.28739340709712	3.61145158888497e-108	GDF15	growth differentiation factor 15 [Source:HGNC Symbol;Acc:HGNC:30142]
ENSG00000130517	1.40586674277433	7.29257218760579e-28	PGPEP1	pyroglutamyl-peptidase I [Source:HGNC Symbol;Acc:HGNC:13568]
ENSG00000130559	-0.529956485837219	0.000300672806293586	CAMSAP1	calmodulin regulated spectrin associated protein 1 [Source:HGNC Symbol;Acc:HGNC:19946]
ENSG00000130560	-0.775058514383164	7.48393341497314e-08	UBAC1	UBA domain containing 1 [Source:HGNC Symbol;Acc:HGNC:30221]
ENSG00000130589	0.705833849086604	6.90386503370046e-06	HELZ2	helicase with zinc finger 2 [Source:HGNC Symbol;Acc:HGNC:30021]
ENSG00000130640	-0.584238639025078	3.20802574166973e-06	TUBGCP2	tubulin gamma complex associated protein 2 [Source:HGNC Symbol;Acc:HGNC:18599]
ENSG00000130653	0.986623185281992	1.14990592256701e-05	PNPLA7	patatin like phospholipase domain containing 7 [Source:HGNC Symbol;Acc:HGNC:24768]
ENSG00000130669	-0.726607751221889	5.16132693566437e-07	PAK4	p21 (RAC1) activated kinase 4 [Source:HGNC Symbol;Acc:HGNC:16059]
ENSG00000130695	-0.522003816508198	0.000126276336244043	CEP85	centrosomal protein 85 [Source:HGNC Symbol;Acc:HGNC:25309]
ENSG00000130699	-0.830809794743412	3.42851768673546e-05	TAF4	TATA-box binding protein associated factor 4 [Source:HGNC Symbol;Acc:HGNC:11537]
ENSG00000130707	3.51119841028072	1.65702715664093e-110	ASS1	argininosuccinate synthase 1 [Source:HGNC Symbol;Acc:HGNC:758]
ENSG00000130713	-0.470657405004099	8.1639462226876e-06	EXOSC2	exosome component 2 [Source:HGNC Symbol;Acc:HGNC:17097]
ENSG00000130717	-0.582696452026952	1.51290887064457e-10	UCK1	uridine-cytidine kinase 1 [Source:HGNC Symbol;Acc:HGNC:14859]
ENSG00000130720	-1.09251644154196	7.95886539653994e-11	FIBCD1	fibrinogen C domain containing 1 [Source:HGNC Symbol;Acc:HGNC:25922]
ENSG00000130726	-1.06234347546715	2.77812434951736e-15	TRIM28	tripartite motif containing 28 [Source:HGNC Symbol;Acc:HGNC:16384]
ENSG00000130731	-0.920875821806026	3.22210892146165e-06	METTL26	methyltransferase like 26 [Source:HGNC Symbol;Acc:HGNC:14141]
ENSG00000130749	-0.615182190010002	0.000110251991650082	ZC3H4	zinc finger CCCH-type containing 4 [Source:HGNC Symbol;Acc:HGNC:17808]
ENSG00000130762	-2.15602301236018	8.18244840559703e-23	ARHGEF16	Rho guanine nucleotide exchange factor 16 [Source:HGNC Symbol;Acc:HGNC:15515]
ENSG00000130766	3.21533859913273	8.35342203442663e-09	SESN2	sestrin 2 [Source:HGNC Symbol;Acc:HGNC:20746]
ENSG00000130768	4.39648165739174	4.79601445658752e-34	SMPDL3B	sphingomyelin phosphodiesterase acid like 3B [Source:HGNC Symbol;Acc:HGNC:21416]
ENSG00000130772	0.555217357835817	2.85258356085765e-06	MED18	mediator complex subunit 18 [Source:HGNC Symbol;Acc:HGNC:25944]
ENSG00000130813	0.715156831965148	1.1774360755096e-10	SHFL	shiftless antiviral inhibitor of ribosomal frameshifting [Source:HGNC Symbol;Acc:HGNC:25649]
ENSG00000130827	-0.973929774203445	1.17859198275435e-15	PLXNA3	plexin A3 [Source:HGNC Symbol;Acc:HGNC:9101]
ENSG00000130830	-0.797638314705063	0.000133905618053884	MPP1	membrane palmitoylated protein 1 [Source:HGNC Symbol;Acc:HGNC:7219]
ENSG00000130956	-0.731258521298055	8.71332719523907e-10	HABP4	hyaluronan binding protein 4 [Source:HGNC Symbol;Acc:HGNC:17062]
ENSG00000130985	-0.574595763565313	0.000118445061507435	UBA1	ubiquitin like modifier activating enzyme 1 [Source:HGNC Symbol;Acc:HGNC:12469]
ENSG00000131016	-1.4875572186393	8.34536175469994e-17	AKAP12	A-kinase anchoring protein 12 [Source:HGNC Symbol;Acc:HGNC:370]
ENSG00000131043	-0.671861917647548	1.90776389981192e-06	AAR2	AAR2 splicing factor [Source:HGNC Symbol;Acc:HGNC:15886]
ENSG00000131044	2.20093625811387	0.000266962734113312	TTLL9	tubulin tyrosine ligase like 9 [Source:HGNC Symbol;Acc:HGNC:16118]
ENSG00000131080	1.12363343137632	4.10336628905786e-08	EDA2R	ectodysplasin A2 receptor [Source:HGNC Symbol;Acc:HGNC:17756]
ENSG00000131094	-4.47851916284999	5.61483866408832e-94	C1QL1	complement C1q like 1 [Source:HGNC Symbol;Acc:HGNC:24182]
ENSG00000131100	1.05758423129186	9.8542075461403e-17	ATP6V1E1	ATPase H+ transporting V1 subunit E1 [Source:HGNC Symbol;Acc:HGNC:857]
ENSG00000131127	-0.95059768214088	8.11080256155759e-06	ZNF141	zinc finger protein 141 [Source:HGNC Symbol;Acc:HGNC:12926]
ENSG00000131153	-1.76724047454206	5.46768139634821e-08	GINS2	GINS complex subunit 2 [Source:HGNC Symbol;Acc:HGNC:24575]
ENSG00000131188	-1.26991492873059	9.09032998794729e-06	PRR7	proline rich 7, synaptic [Source:HGNC Symbol;Acc:HGNC:28130]
ENSG00000131323	-0.695561245658959	4.26719629530721e-08	TRAF3	TNF receptor associated factor 3 [Source:HGNC Symbol;Acc:HGNC:12033]
ENSG00000131373	0.509805998275275	0.000544376157172577	HACL1	2-hydroxyacyl-CoA lyase 1 [Source:HGNC Symbol;Acc:HGNC:17856]
ENSG00000131378	-1.45449822826298	4.44426430239619e-06	RFTN1	raftlin, lipid raft linker 1 [Source:HGNC Symbol;Acc:HGNC:30278]
ENSG00000131379	-3.42314231053804	0.000176855768483561	C3orf20	chromosome 3 open reading frame 20 [Source:HGNC Symbol;Acc:HGNC:25320]
ENSG00000131389	-1.83722561715403	8.52055021327655e-09	SLC6A6	solute carrier family 6 member 6 [Source:HGNC Symbol;Acc:HGNC:11052]
ENSG00000131459	1.82879833365996	3.22995024026323e-10	GFPT2	glutamine-fructose-6-phosphate transaminase 2 [Source:HGNC Symbol;Acc:HGNC:4242]
ENSG00000131462	-0.438959921808645	0.000495318613123357	TUBG1	tubulin gamma 1 [Source:HGNC Symbol;Acc:HGNC:12417]
ENSG00000131471	2.00363645975401	1.9707416951761e-09	AOC3	amine oxidase copper containing 3 [Source:HGNC Symbol;Acc:HGNC:550]
ENSG00000131480	1.04697299036618	2.23185241185189e-06	AOC2	amine oxidase copper containing 2 [Source:HGNC Symbol;Acc:HGNC:549]
ENSG00000131504	-0.56063297745508	4.39656454743419e-08	DIAPH1	diaphanous related formin 1 [Source:HGNC Symbol;Acc:HGNC:2876]
ENSG00000131584	-0.655088029249941	4.30614515616645e-06	ACAP3	ArfGAP with coiled-coil, ankyrin repeat and PH domains 3 [Source:HGNC Symbol;Acc:HGNC:16754]
ENSG00000131591	-0.442864338354135	8.37049440259725e-05	C1orf159	chromosome 1 open reading frame 159 [Source:HGNC Symbol;Acc:HGNC:26062]
ENSG00000131650	-2.12534669193723	9.19336061172039e-07	KREMEN2	kringle containing transmembrane protein 2 [Source:HGNC Symbol;Acc:HGNC:18797]
ENSG00000131652	-0.414585042438625	0.000632093536181063	THOC6	THO complex 6 [Source:HGNC Symbol;Acc:HGNC:28369]
ENSG00000131669	1.43326221297623	8.21170460753804e-39	NINJ1	ninjurin 1 [Source:HGNC Symbol;Acc:HGNC:7824]
ENSG00000131697	-0.469674570586075	0.000573957212971329	NPHP4	nephrocystin 4 [Source:HGNC Symbol;Acc:HGNC:19104]
ENSG00000131737	2.23912051176473	0.000505033523339488	KRT34	keratin 34 [Source:HGNC Symbol;Acc:HGNC:6452]
ENSG00000131759	-1.55363130052665	6.0020386469628e-34	RARA	retinoic acid receptor alpha [Source:HGNC Symbol;Acc:HGNC:9864]
ENSG00000131781	1.13554575021971	0.000814598454955038	FMO5	flavin containing dimethylaniline monoxygenase 5 [Source:HGNC Symbol;Acc:HGNC:3773]
ENSG00000131791	0.615125296453452	0.000906129417176261	PRKAB2	protein kinase AMP-activated non-catalytic subunit beta 2 [Source:HGNC Symbol;Acc:HGNC:9379]
ENSG00000131797	1.41126162831164	2.78990946728663e-14	CLUHP3	clustered mitochondria homolog pseudogene 3 [Source:HGNC Symbol;Acc:HGNC:28447]
ENSG00000131873	-0.79673911000845	3.10878871009099e-08	CHSY1	chondroitin sulfate synthase 1 [Source:HGNC Symbol;Acc:HGNC:17198]
ENSG00000131899	-0.53411950134653	6.49465220778048e-06	LLGL1	LLGL scribble cell polarity complex component 1 [Source:HGNC Symbol;Acc:HGNC:6628]
ENSG00000131943	-0.452492649802719	9.32513589701146e-05	C19orf12	chromosome 19 open reading frame 12 [Source:HGNC Symbol;Acc:HGNC:25443]
ENSG00000131981	-1.18728699086254	1.62193354349294e-18	LGALS3	galectin 3 [Source:HGNC Symbol;Acc:HGNC:6563]
ENSG00000132003	0.577188511985557	0.000205509369706528	ZSWIM4	zinc finger SWIM-type containing 4 [Source:HGNC Symbol;Acc:HGNC:25704]
ENSG00000132024	0.346163961859737	0.00039299769259766	CC2D1A	coiled-coil and C2 domain containing 1A [Source:HGNC Symbol;Acc:HGNC:30237]
ENSG00000132031	1.14881901671936	0.000116067854013184	MATN3	matrilin 3 [Source:HGNC Symbol;Acc:HGNC:6909]
ENSG00000132141	1.40600101257617	5.80445356323718e-05	CCT6B	chaperonin containing TCP1 subunit 6B [Source:HGNC Symbol;Acc:HGNC:1621]
ENSG00000132153	-0.445216665166938	5.27096292349222e-06	DHX30	DExH-box helicase 30 [Source:HGNC Symbol;Acc:HGNC:16716]
ENSG00000132170	0.727503222018851	2.53516004144134e-07	PPARG	peroxisome proliferator activated receptor gamma [Source:HGNC Symbol;Acc:HGNC:9236]
ENSG00000132182	0.868886000530337	1.89706675948248e-08	NUP210	nucleoporin 210 [Source:HGNC Symbol;Acc:HGNC:30052]
ENSG00000132205	2.23673335575423	8.03507016688643e-08	EMILIN2	elastin microfibril interfacer 2 [Source:HGNC Symbol;Acc:HGNC:19881]
ENSG00000132274	1.25649774527335	9.98064775323003e-25	TRIM22	tripartite motif containing 22 [Source:HGNC Symbol;Acc:HGNC:16379]
ENSG00000132326	0.909376582103189	9.91845210196085e-07	PER2	period circadian regulator 2 [Source:HGNC Symbol;Acc:HGNC:8846]
ENSG00000132330	0.668026274914937	1.3599281343171e-05	SCLY	selenocysteine lyase [Source:HGNC Symbol;Acc:HGNC:18161]
ENSG00000132359	2.23065767594527	3.33302033095001e-17	RAP1GAP2	RAP1 GTPase activating protein 2 [Source:HGNC Symbol;Acc:HGNC:29176]
ENSG00000132361	-1.12112172257279	1.0833192520847e-18	CLUH	clustered mitochondria homolog [Source:HGNC Symbol;Acc:HGNC:29094]
ENSG00000132382	-0.580973536183842	5.52094904781239e-06	MYBBP1A	MYB binding protein 1a [Source:HGNC Symbol;Acc:HGNC:7546]
ENSG00000132383	-0.974316912655732	1.13137841703185e-09	RPA1	replication protein A1 [Source:HGNC Symbol;Acc:HGNC:10289]
ENSG00000132388	-0.62657341371988	6.11059952948545e-09	UBE2G1	ubiquitin conjugating enzyme E2 G1 [Source:HGNC Symbol;Acc:HGNC:12482]
ENSG00000132394	-0.935480335346547	2.21831372340251e-12	EEFSEC	eukaryotic elongation factor, selenocysteine-tRNA specific [Source:HGNC Symbol;Acc:HGNC:24614]
ENSG00000132405	-0.409274065763627	4.58935801391269e-05	TBC1D14	TBC1 domain family member 14 [Source:HGNC Symbol;Acc:HGNC:29246]
ENSG00000132434	-0.755903845707114	3.76058308537988e-05	LANCL2	LanC like 2 [Source:HGNC Symbol;Acc:HGNC:6509]
ENSG00000132437	2.61081004828675	5.06795073575169e-18	DDC	dopa decarboxylase [Source:HGNC Symbol;Acc:HGNC:2719]
ENSG00000132471	0.412973924857825	1.2093353883481e-05	WBP2	WW domain binding protein 2 [Source:HGNC Symbol;Acc:HGNC:12738]
ENSG00000132510	1.26477824353772	1.36125588172658e-05	KDM6B	lysine demethylase 6B [Source:HGNC Symbol;Acc:HGNC:29012]
ENSG00000132522	-0.381609862092503	0.000367134326129516	GPS2	G protein pathway suppressor 2 [Source:HGNC Symbol;Acc:HGNC:4550]
ENSG00000132530	2.63905623771049	7.60529948204071e-15	XAF1	XIAP associated factor 1 [Source:HGNC Symbol;Acc:HGNC:30932]
ENSG00000132535	0.541853140616865	9.71430996626977e-05	DLG4	discs large MAGUK scaffold protein 4 [Source:HGNC Symbol;Acc:HGNC:2903]
ENSG00000132554	2.36213814436087	2.98278952336603e-31	RGS22	regulator of G protein signaling 22 [Source:HGNC Symbol;Acc:HGNC:24499]
ENSG00000132612	-0.497767795612503	4.19962996356018e-05	VPS4A	vacuolar protein sorting 4 homolog A [Source:HGNC Symbol;Acc:HGNC:13488]
ENSG00000132613	-1.37498436220411	8.41020441327664e-09	MTSS2	MTSS I-BAR domain containing 2 [Source:HGNC Symbol;Acc:HGNC:25094]
ENSG00000132623	0.453617693866673	0.000462975711171472	ANKEF1	ankyrin repeat and EF-hand domain containing 1 [Source:HGNC Symbol;Acc:HGNC:15803]
ENSG00000132646	-1.09512500659883	3.70637173280991e-06	PCNA	proliferating cell nuclear antigen [Source:HGNC Symbol;Acc:HGNC:8729]
ENSG00000132670	-0.658189589279819	1.71443734200338e-06	PTPRA	protein tyrosine phosphatase receptor type A [Source:HGNC Symbol;Acc:HGNC:9664]
ENSG00000132676	0.841153402918607	5.7879517121379e-08	DAP3	death associated protein 3 [Source:HGNC Symbol;Acc:HGNC:2673]
ENSG00000132694	0.489874692565209	0.000281188322637814	ARHGEF11	Rho guanine nucleotide exchange factor 11 [Source:HGNC Symbol;Acc:HGNC:14580]
ENSG00000132716	0.930262174340385	2.94729971683593e-16	DCAF8	DDB1 and CUL4 associated factor 8 [Source:HGNC Symbol;Acc:HGNC:24891]
ENSG00000132740	-0.575487981428234	1.08589718854891e-05	IGHMBP2	immunoglobulin mu DNA binding protein 2 [Source:HGNC Symbol;Acc:HGNC:5542]
ENSG00000132819	-0.698664854859431	1.86729581318212e-05	RBM38	RNA binding motif protein 38 [Source:HGNC Symbol;Acc:HGNC:15818]
ENSG00000132837	0.9207584612982	4.50366358264694e-06	DMGDH	dimethylglycine dehydrogenase [Source:HGNC Symbol;Acc:HGNC:24475]
ENSG00000132846	1.12081985268562	3.48750304541776e-06	ZBED3	zinc finger BED-type containing 3 [Source:HGNC Symbol;Acc:HGNC:20711]
ENSG00000132952	-0.487725932369055	1.05192135418945e-05	USPL1	ubiquitin specific peptidase like 1 [Source:HGNC Symbol;Acc:HGNC:20294]
ENSG00000132965	3.91810314853291	1.55444785611925e-08	ALOX5AP	arachidonate 5-lipoxygenase activating protein [Source:HGNC Symbol;Acc:HGNC:436]
ENSG00000132967	-0.730892669854236	8.82488169688449e-09	HMGB1P5	high mobility group box 1 pseudogene 5 [Source:HGNC Symbol;Acc:HGNC:4997]
ENSG00000132970	-1.9944371343065	1.71689212309723e-13	WASF3	WASP family member 3 [Source:HGNC Symbol;Acc:HGNC:12734]
ENSG00000133019	3.20323222669307	6.95427369732347e-06	CHRM3	cholinergic receptor muscarinic 3 [Source:HGNC Symbol;Acc:HGNC:1952]
ENSG00000133026	-1.17085685449868	3.2687997733677e-06	MYH10	myosin heavy chain 10 [Source:HGNC Symbol;Acc:HGNC:7568]
ENSG00000133030	-1.04278206446419	2.27699782437576e-07	MPRIP	myosin phosphatase Rho interacting protein [Source:HGNC Symbol;Acc:HGNC:30321]
ENSG00000133059	2.97162073133468	1.40093944462761e-163	DSTYK	dual serine/threonine and tyrosine protein kinase [Source:HGNC Symbol;Acc:HGNC:29043]
ENSG00000133065	0.465123644818332	0.000730901194260252	SLC41A1	solute carrier family 41 member 1 [Source:HGNC Symbol;Acc:HGNC:19429]
ENSG00000133069	2.00133046802444	1.67714262066855e-38	TMCC2	transmembrane and coiled-coil domain family 2 [Source:HGNC Symbol;Acc:HGNC:24239]
ENSG00000133106	3.98843645598003	1.50508980195283e-06	EPSTI1	epithelial stromal interaction 1 [Source:HGNC Symbol;Acc:HGNC:16465]
ENSG00000133121	-0.507847322742028	0.000741593877279867	STARD13	StAR related lipid transfer domain containing 13 [Source:HGNC Symbol;Acc:HGNC:19164]
ENSG00000133134	4.90236720253633	2.53892940722359e-05	BEX2	brain expressed X-linked 2 [Source:HGNC Symbol;Acc:HGNC:30933]
ENSG00000133135	1.66738218432795	1.01867296609581e-06	RNF128	ring finger protein 128 [Source:HGNC Symbol;Acc:HGNC:21153]
ENSG00000133195	0.568531081558697	5.8682155382788e-09	SLC39A11	solute carrier family 39 member 11 [Source:HGNC Symbol;Acc:HGNC:14463]
ENSG00000133216	0.923772380790867	1.94663109618646e-06	EPHB2	EPH receptor B2 [Source:HGNC Symbol;Acc:HGNC:3393]
ENSG00000133243	-0.594730634955189	5.49337023923551e-05	BTBD2	BTB domain containing 2 [Source:HGNC Symbol;Acc:HGNC:15504]
ENSG00000133315	-0.679121740812823	0.00021547394400264	MACROD1	mono-ADP ribosylhydrolase 1 [Source:HGNC Symbol;Acc:HGNC:29598]
ENSG00000133321	2.35846673557098	5.43298876408994e-60	PLAAT4	phospholipase A and acyltransferase 4 [Source:HGNC Symbol;Acc:HGNC:9869]
ENSG00000133460	0.710135743041654	8.41350029281582e-07	SLC2A11	solute carrier family 2 member 11 [Source:HGNC Symbol;Acc:HGNC:14239]
ENSG00000133475	2.10385599046135	0.00094587055977226	GGT2	gamma-glutamyltransferase 2 [Source:HGNC Symbol;Acc:HGNC:4251]
ENSG00000133477	-1.77697683535328	1.77372516534403e-08	FAM83F	family with sequence similarity 83 member F [Source:HGNC Symbol;Acc:HGNC:25148]
ENSG00000133612	-0.520778350421143	1.23198966096347e-07	AGAP3	ArfGAP with GTPase domain, ankyrin repeat and PH domain 3 [Source:HGNC Symbol;Acc:HGNC:16923]
ENSG00000133639	1.19289346987625	2.65920830386763e-07	BTG1	BTG anti-proliferation factor 1 [Source:HGNC Symbol;Acc:HGNC:1130]
ENSG00000133687	3.11745811130616	1.3738957496447e-09	TMTC1	transmembrane O-mannosyltransferase targeting cadherins 1 [Source:HGNC Symbol;Acc:HGNC:24099]
ENSG00000133789	-0.718542489496393	4.95283976041064e-08	SWAP70	switching B cell complex subunit SWAP70 [Source:HGNC Symbol;Acc:HGNC:17070]
ENSG00000133818	0.647469241468989	0.000448829365633147	RRAS2	RAS related 2 [Source:HGNC Symbol;Acc:HGNC:17271]
ENSG00000133863	-1.92348638444256	2.68822165610653e-10	TEX15	testis expressed 15, meiosis and synapsis associated [Source:HGNC Symbol;Acc:HGNC:11738]
ENSG00000133895	-0.643022975832413	2.28611960891165e-07	MEN1	menin 1 [Source:HGNC Symbol;Acc:HGNC:7010]
ENSG00000133935	-0.585159569879125	1.64960515372734e-05	ERG28	ergosterol biosynthesis 28 homolog [Source:HGNC Symbol;Acc:HGNC:1187]
ENSG00000133943	-0.550655468962625	2.19962201707012e-06	DGLUCY	D-glutamate cyclase [Source:HGNC Symbol;Acc:HGNC:20498]
ENSG00000133985	-2.07636203470077	7.75156520734133e-09	TTC9	tetratricopeptide repeat domain 9 [Source:HGNC Symbol;Acc:HGNC:20267]
ENSG00000134001	-0.521505301607819	0.000278884940869755	EIF2S1	eukaryotic translation initiation factor 2 subunit alpha [Source:HGNC Symbol;Acc:HGNC:3265]
ENSG00000134013	-1.2252698060796	1.2949716166473e-13	LOXL2	lysyl oxidase like 2 [Source:HGNC Symbol;Acc:HGNC:6666]
ENSG00000134057	-0.702477766407662	0.000321923387173584	CCNB1	cyclin B1 [Source:HGNC Symbol;Acc:HGNC:1579]
ENSG00000134070	2.27453324671342	1.47020434143528e-79	IRAK2	interleukin 1 receptor associated kinase 2 [Source:HGNC Symbol;Acc:HGNC:6113]
ENSG00000134086	5.83559116172637	0	VHL	von Hippel-Lindau tumor suppressor [Source:HGNC Symbol;Acc:HGNC:12687]
ENSG00000134107	-0.969832757477968	5.57958191601835e-15	BHLHE40	basic helix-loop-helix family member e40 [Source:HGNC Symbol;Acc:HGNC:1046]
ENSG00000134115	1.02441097059684	2.99897820079055e-13	CNTN6	contactin 6 [Source:HGNC Symbol;Acc:HGNC:2176]
ENSG00000134121	4.56965188331619	2.1796925864458e-06	CHL1	cell adhesion molecule L1 like [Source:HGNC Symbol;Acc:HGNC:1939]
ENSG00000134138	-1.25936826132639	2.92921808714074e-06	MEIS2	Meis homeobox 2 [Source:HGNC Symbol;Acc:HGNC:7001]
ENSG00000134198	-4.02853206104887	1.26683278792084e-24	TSPAN2	tetraspanin 2 [Source:HGNC Symbol;Acc:HGNC:20659]
ENSG00000134202	1.87682985801128	6.10793988799348e-15	GSTM3	glutathione S-transferase mu 3 [Source:HGNC Symbol;Acc:HGNC:4635]
ENSG00000134245	1.46968552443518	1.92966757675525e-05	WNT2B	Wnt family member 2B [Source:HGNC Symbol;Acc:HGNC:12781]
ENSG00000134256	-1.88422839848693	0.000581801494787476	CD101	CD101 molecule [Source:HGNC Symbol;Acc:HGNC:5949]
ENSG00000134285	0.717850812192158	4.64804057591943e-08	FKBP11	FKBP prolyl isomerase 11 [Source:HGNC Symbol;Acc:HGNC:18624]
ENSG00000134321	5.1259689890173	3.16195193914315e-13	RSAD2	radical S-adenosyl methionine domain containing 2 [Source:HGNC Symbol;Acc:HGNC:30908]
ENSG00000134326	2.11855915708233	1.20082766987156e-06	CMPK2	cytidine/uridine monophosphate kinase 2 [Source:HGNC Symbol;Acc:HGNC:27015]
ENSG00000134333	-1.33509191436918	1.24632571612215e-08	LDHA	lactate dehydrogenase A [Source:HGNC Symbol;Acc:HGNC:6535]
ENSG00000134339	1.93802824225606	1.22679971082575e-07	SAA2	serum amyloid A2 [Source:HGNC Symbol;Acc:HGNC:10514]
ENSG00000134375	0.49107631183005	0.000594317635991601	TIMM17A	translocase of inner mitochondrial membrane 17A [Source:HGNC Symbol;Acc:HGNC:17315]
ENSG00000134440	0.757827327543142	0.000952874255971735	NARS	asparaginyl-tRNA synthetase [Source:HGNC Symbol;Acc:HGNC:7643]
ENSG00000134453	-0.610447325011423	1.25038040491308e-10	RBM17	RNA binding motif protein 17 [Source:HGNC Symbol;Acc:HGNC:16944]
ENSG00000134461	-0.509732672301625	1.98126874497372e-05	ANKRD16	ankyrin repeat domain 16 [Source:HGNC Symbol;Acc:HGNC:23471]
ENSG00000134470	0.781761061825358	8.06384809113315e-06	IL15RA	interleukin 15 receptor subunit alpha [Source:HGNC Symbol;Acc:HGNC:5978]
ENSG00000134531	2.0858742205342	3.28039444415802e-13	EMP1	epithelial membrane protein 1 [Source:HGNC Symbol;Acc:HGNC:3333]
ENSG00000134545	3.70754594065083	1.0780034963962e-64	KLRC1	killer cell lectin like receptor C1 [Source:HGNC Symbol;Acc:HGNC:6374]
ENSG00000134548	6.52109442366847	2.39350721392573e-15	SPX	spexin hormone [Source:HGNC Symbol;Acc:HGNC:28139]
ENSG00000134590	-0.66662270882654	3.18581630678408e-07	RTL8C	retrotransposon Gag like 8C [Source:HGNC Symbol;Acc:HGNC:2569]
ENSG00000134684	0.978179950394328	0.000386232641279157	YARS	tyrosyl-tRNA synthetase [Source:HGNC Symbol;Acc:HGNC:12840]
ENSG00000134690	-0.427339078851425	0.000212945562936025	CDCA8	cell division cycle associated 8 [Source:HGNC Symbol;Acc:HGNC:14629]
ENSG00000134717	0.874938735597919	0.000485311161227853	BTF3L4	basic transcription factor 3 like 4 [Source:HGNC Symbol;Acc:HGNC:30547]
ENSG00000134769	1.86408678705432	0.000793114183136373	DTNA	dystrobrevin alpha [Source:HGNC Symbol;Acc:HGNC:3057]
ENSG00000134779	-0.495038676529279	0.000185177132437632	TPGS2	tubulin polyglutamylase complex subunit 2 [Source:HGNC Symbol;Acc:HGNC:24561]
ENSG00000134780	-0.932120742388801	8.60354110257942e-06	DAGLA	diacylglycerol lipase alpha [Source:HGNC Symbol;Acc:HGNC:1165]
ENSG00000134802	-0.690208911945953	1.96370309173096e-09	SLC43A3	solute carrier family 43 member 3 [Source:HGNC Symbol;Acc:HGNC:17466]
ENSG00000134824	-1.17294492446114	2.95449451532447e-08	FADS2	fatty acid desaturase 2 [Source:HGNC Symbol;Acc:HGNC:3575]
ENSG00000134827	3.60330058126894	8.78746372347268e-36	TCN1	transcobalamin 1 [Source:HGNC Symbol;Acc:HGNC:11652]
ENSG00000134851	-0.326023091522416	0.000246796653513457	TMEM165	transmembrane protein 165 [Source:HGNC Symbol;Acc:HGNC:30760]
ENSG00000134871	0.416405286840484	7.55117356551133e-06	COL4A2	collagen type IV alpha 2 chain [Source:HGNC Symbol;Acc:HGNC:2203]
ENSG00000134874	-0.550522290309589	0.000225186206293948	DZIP1	DAZ interacting zinc finger protein 1 [Source:HGNC Symbol;Acc:HGNC:20908]
ENSG00000134897	-0.569099938372391	3.28225418787396e-06	BIVM	basic, immunoglobulin-like variable motif containing [Source:HGNC Symbol;Acc:HGNC:16034]
ENSG00000134901	-0.873901494341968	1.15468537220804e-06	POGLUT2	protein O-glucosyltransferase 2 [Source:HGNC Symbol;Acc:HGNC:19350]
ENSG00000134955	0.984188947311682	0.000803906569067036	SLC37A2	solute carrier family 37 member 2 [Source:HGNC Symbol;Acc:HGNC:20644]
ENSG00000134996	-0.421533016673972	2.50296215844588e-05	OSTF1	osteoclast stimulating factor 1 [Source:HGNC Symbol;Acc:HGNC:8510]
ENSG00000135045	-0.840780903837447	5.28949972846013e-06	C9orf40	chromosome 9 open reading frame 40 [Source:HGNC Symbol;Acc:HGNC:23433]
ENSG00000135046	0.649236141418675	7.72645194656293e-06	ANXA1	annexin A1 [Source:HGNC Symbol;Acc:HGNC:533]
ENSG00000135069	2.03476327511646	8.01863209545437e-09	PSAT1	phosphoserine aminotransferase 1 [Source:HGNC Symbol;Acc:HGNC:19129]
ENSG00000135074	-0.732467444187313	1.74403079886203e-11	ADAM19	ADAM metallopeptidase domain 19 [Source:HGNC Symbol;Acc:HGNC:197]
ENSG00000135077	1.8144814116322	2.69104481044805e-05	HAVCR2	hepatitis A virus cellular receptor 2 [Source:HGNC Symbol;Acc:HGNC:18437]
ENSG00000135083	0.972587331061979	0.000786271958125961	CCNJL	cyclin J like [Source:HGNC Symbol;Acc:HGNC:25876]
ENSG00000135093	-1.10149862426795	5.04498697125709e-05	USP30	ubiquitin specific peptidase 30 [Source:HGNC Symbol;Acc:HGNC:20065]
ENSG00000135108	-0.718324838003959	0.00043875103043673	FBXO21	F-box protein 21 [Source:HGNC Symbol;Acc:HGNC:13592]
ENSG00000135111	-0.457499360091759	2.36156209021412e-05	TBX3	T-box transcription factor 3 [Source:HGNC Symbol;Acc:HGNC:11602]
ENSG00000135114	4.77286595699725	8.23908897817387e-56	OASL	2'-5'-oligoadenylate synthetase like [Source:HGNC Symbol;Acc:HGNC:8090]
ENSG00000135127	1.90497207830373	3.96623091115132e-19	BICDL1	BICD family like cargo adaptor 1 [Source:HGNC Symbol;Acc:HGNC:28095]
ENSG00000135241	0.415025159896304	3.15394467019557e-05	PNPLA8	patatin like phospholipase domain containing 8 [Source:HGNC Symbol;Acc:HGNC:28900]
ENSG00000135245	-2.4318069327749	3.67646656063533e-16	HILPDA	hypoxia inducible lipid droplet associated [Source:HGNC Symbol;Acc:HGNC:28859]
ENSG00000135253	1.70802443757618	2.85381675568559e-21	KCP	kielin cysteine rich BMP regulator [Source:HGNC Symbol;Acc:HGNC:17585]
ENSG00000135316	-0.527220286366237	4.9142430194626e-07	SYNCRIP	synaptotagmin binding cytoplasmic RNA interacting protein [Source:HGNC Symbol;Acc:HGNC:16918]
ENSG00000135318	-0.89520311189524	1.7883151583638e-12	NT5E	5'-nucleotidase ecto [Source:HGNC Symbol;Acc:HGNC:8021]
ENSG00000135362	-1.02917853222933	4.52882209422597e-10	PRR5L	proline rich 5 like [Source:HGNC Symbol;Acc:HGNC:25878]
ENSG00000135387	-0.508695328331452	0.000184425302344574	CAPRIN1	cell cycle associated protein 1 [Source:HGNC Symbol;Acc:HGNC:6743]
ENSG00000135424	1.4015872019548	4.06588759405439e-09	ITGA7	integrin subunit alpha 7 [Source:HGNC Symbol;Acc:HGNC:6143]
ENSG00000135437	0.672087024123368	4.85898431103835e-05	RDH5	retinol dehydrogenase 5 [Source:HGNC Symbol;Acc:HGNC:9940]
ENSG00000135447	3.61524420564808	7.14779885745821e-11	PPP1R1A	protein phosphatase 1 regulatory inhibitor subunit 1A [Source:HGNC Symbol;Acc:HGNC:9286]
ENSG00000135473	0.446885101011937	0.000339970997831516	PAN2	poly(A) specific ribonuclease subunit PAN2 [Source:HGNC Symbol;Acc:HGNC:20074]
ENSG00000135480	2.74791964513935	3.89934598965851e-57	KRT7	keratin 7 [Source:HGNC Symbol;Acc:HGNC:6445]
ENSG00000135502	2.10063092946185	1.41055324584768e-06	SLC26A10	solute carrier family 26 member 10 [Source:HGNC Symbol;Acc:HGNC:14470]
ENSG00000135525	1.21967954089462	0.000120240694086112	MAP7	microtubule associated protein 7 [Source:HGNC Symbol;Acc:HGNC:6869]
ENSG00000135540	1.50953710112557	1.43044083630452e-06	NHSL1	NHS like 1 [Source:HGNC Symbol;Acc:HGNC:21021]
ENSG00000135597	-0.486913269744218	8.3110774367359e-05	REPS1	RALBP1 associated Eps domain containing 1 [Source:HGNC Symbol;Acc:HGNC:15578]
ENSG00000135617	-0.799631125015761	4.12088875134776e-05	PRADC1	protease associated domain containing 1 [Source:HGNC Symbol;Acc:HGNC:16047]
ENSG00000135636	-0.670795883492094	9.55495927338834e-07	DYSF	dysferlin [Source:HGNC Symbol;Acc:HGNC:3097]
ENSG00000135643	-1.77240458113902	3.56620207485839e-10	KCNMB4	potassium calcium-activated channel subfamily M regulatory beta subunit 4 [Source:HGNC Symbol;Acc:HGNC:6289]
ENSG00000135679	1.13402486782097	1.52761366471594e-08	MDM2	MDM2 proto-oncogene [Source:HGNC Symbol;Acc:HGNC:6973]
ENSG00000135697	0.96557165176782	0.000742302724515627	BCO1	beta-carotene oxygenase 1 [Source:HGNC Symbol;Acc:HGNC:13815]
ENSG00000135722	-0.72622324266843	0.000677828212152533	FBXL8	F-box and leucine rich repeat protein 8 [Source:HGNC Symbol;Acc:HGNC:17875]
ENSG00000135723	-0.599668117105652	6.0350009665688e-05	FHOD1	formin homology 2 domain containing 1 [Source:HGNC Symbol;Acc:HGNC:17905]
ENSG00000135744	1.79044398616863	9.24150311909972e-07	AGT	angiotensinogen [Source:HGNC Symbol;Acc:HGNC:333]
ENSG00000135749	1.09637122870559	1.24575993575895e-13	PCNX2	pecanex 2 [Source:HGNC Symbol;Acc:HGNC:8736]
ENSG00000135750	1.11814905093901	9.2397087293661e-05	KCNK1	potassium two pore domain channel subfamily K member 1 [Source:HGNC Symbol;Acc:HGNC:6272]
ENSG00000135778	0.779489827965221	4.75080278481391e-09	NTPCR	nucleoside-triphosphatase, cancer-related [Source:HGNC Symbol;Acc:HGNC:28204]
ENSG00000135823	0.677806513101469	8.56384748940557e-15	STX6	syntaxin 6 [Source:HGNC Symbol;Acc:HGNC:11441]
ENSG00000135838	2.1910146407334	2.53125650991327e-10	NPL	N-acetylneuraminate pyruvate lyase [Source:HGNC Symbol;Acc:HGNC:16781]
ENSG00000135842	1.82907559841659	9.54809052438129e-50	NIBAN1	niban apoptosis regulator 1 [Source:HGNC Symbol;Acc:HGNC:16784]
ENSG00000135899	0.951160587166157	4.89531987515747e-14	SP110	SP110 nuclear body protein [Source:HGNC Symbol;Acc:HGNC:5401]
ENSG00000135905	0.887722191356298	8.13753833444138e-05	DOCK10	dedicator of cytokinesis 10 [Source:HGNC Symbol;Acc:HGNC:23479]
ENSG00000135926	-0.461274897657458	3.49052901107049e-06	TMBIM1	transmembrane BAX inhibitor motif containing 1 [Source:HGNC Symbol;Acc:HGNC:23410]
ENSG00000135931	0.943863809626228	1.4423242394772e-21	ARMC9	armadillo repeat containing 9 [Source:HGNC Symbol;Acc:HGNC:20730]
ENSG00000135968	0.656340452911334	0.00016483572788819	GCC2	GRIP and coiled-coil domain containing 2 [Source:HGNC Symbol;Acc:HGNC:23218]
ENSG00000135976	-0.975418497255941	1.83644889852131e-06	ANKRD36	ankyrin repeat domain 36 [Source:HGNC Symbol;Acc:HGNC:24079]
ENSG00000135999	0.423543460135502	6.7312570876274e-05	EPC2	enhancer of polycomb homolog 2 [Source:HGNC Symbol;Acc:HGNC:24543]
ENSG00000136003	0.764556329211342	1.64837592881987e-05	ISCU	iron-sulfur cluster assembly enzyme [Source:HGNC Symbol;Acc:HGNC:29882]
ENSG00000136026	-0.437868628420238	2.63422433485612e-05	CKAP4	cytoskeleton associated protein 4 [Source:HGNC Symbol;Acc:HGNC:16991]
ENSG00000136040	2.25855613435889	1.93084224937452e-05	PLXNC1	plexin C1 [Source:HGNC Symbol;Acc:HGNC:9106]
ENSG00000136044	-0.892660083039586	2.63576866754926e-07	APPL2	adaptor protein, phosphotyrosine interacting with PH domain and leucine zipper 2 [Source:HGNC Symbol;Acc:HGNC:18242]
ENSG00000136045	-0.523150495837246	3.30971315209123e-07	PWP1	PWP1 homolog, endonuclein [Source:HGNC Symbol;Acc:HGNC:17015]
ENSG00000136048	1.36389761002215	1.00017296908848e-11	DRAM1	DNA damage regulated autophagy modulator 1 [Source:HGNC Symbol;Acc:HGNC:25645]
ENSG00000136108	-0.527843384337591	0.000349508423676373	CKAP2	cytoskeleton associated protein 2 [Source:HGNC Symbol;Acc:HGNC:1990]
ENSG00000136111	-1.61338182403693	3.99197476113689e-10	TBC1D4	TBC1 domain family member 4 [Source:HGNC Symbol;Acc:HGNC:19165]
ENSG00000136153	-0.645101628660971	0.000200827787192866	LMO7	LIM domain 7 [Source:HGNC Symbol;Acc:HGNC:6646]
ENSG00000136155	3.13112203691345	2.11385710866003e-08	SCEL	sciellin [Source:HGNC Symbol;Acc:HGNC:10573]
ENSG00000136213	-1.33212412703193	1.15468537220804e-06	CHST12	carbohydrate sulfotransferase 12 [Source:HGNC Symbol;Acc:HGNC:17423]
ENSG00000136235	1.54895218302321	6.54105927129536e-22	GPNMB	glycoprotein nmb [Source:HGNC Symbol;Acc:HGNC:4462]
ENSG00000136238	-0.433487289141251	4.34003619911254e-05	RAC1	Rac family small GTPase 1 [Source:HGNC Symbol;Acc:HGNC:9801]
ENSG00000136240	-0.498174436903527	1.91033230986651e-07	KDELR2	KDEL endoplasmic reticulum protein retention receptor 2 [Source:HGNC Symbol;Acc:HGNC:6305]
ENSG00000136244	3.15151391368619	2.74193100701374e-06	IL6	interleukin 6 [Source:HGNC Symbol;Acc:HGNC:6018]
ENSG00000136250	2.58885196150234	7.20049622573859e-17	AOAH	acyloxyacyl hydrolase [Source:HGNC Symbol;Acc:HGNC:548]
ENSG00000136261	-0.45422116205791	0.000231538008156987	BZW2	basic leucine zipper and W2 domains 2 [Source:HGNC Symbol;Acc:HGNC:18808]
ENSG00000136267	2.78143746027528	0.000812324127459297	DGKB	diacylglycerol kinase beta [Source:HGNC Symbol;Acc:HGNC:2850]
ENSG00000136270	-0.437399873529121	1.92364060465089e-05	TBRG4	transforming growth factor beta regulator 4 [Source:HGNC Symbol;Acc:HGNC:17443]
ENSG00000136279	-0.723167172787104	4.21820032744029e-14	DBNL	drebrin like [Source:HGNC Symbol;Acc:HGNC:2696]
ENSG00000136280	-0.747655370412062	6.26935380909649e-08	CCM2	CCM2 scaffold protein [Source:HGNC Symbol;Acc:HGNC:21708]
ENSG00000136295	-1.65999944397044	1.36213021060238e-09	TTYH3	tweety family member 3 [Source:HGNC Symbol;Acc:HGNC:22222]
ENSG00000136425	-1.62462674470798	0.000397492805563859	CIB2	calcium and integrin binding family member 2 [Source:HGNC Symbol;Acc:HGNC:24579]
ENSG00000136436	0.791349405584003	3.72353615876817e-06	CALCOCO2	calcium binding and coiled-coil domain 2 [Source:HGNC Symbol;Acc:HGNC:29912]
ENSG00000136490	-0.690870737134584	0.000100673898463328	LIMD2	LIM domain containing 2 [Source:HGNC Symbol;Acc:HGNC:28142]
ENSG00000136492	-1.03051953254856	2.11767311621025e-07	BRIP1	BRCA1 interacting protein C-terminal helicase 1 [Source:HGNC Symbol;Acc:HGNC:20473]
ENSG00000136514	3.79722864917659	6.09262746186804e-07	RTP4	receptor transporter protein 4 [Source:HGNC Symbol;Acc:HGNC:23992]
ENSG00000136560	0.769782179903754	1.04742872443234e-08	TANK	TRAF family member associated NFKB activator [Source:HGNC Symbol;Acc:HGNC:11562]
ENSG00000136628	0.982130965642989	3.86735283525038e-08	EPRS	glutamyl-prolyl-tRNA synthetase [Source:HGNC Symbol;Acc:HGNC:3418]
ENSG00000136630	-1.11613661204288	5.58400902634082e-21	HLX	H2.0 like homeobox [Source:HGNC Symbol;Acc:HGNC:4978]
ENSG00000136631	0.489274236051533	3.63200014635351e-05	VPS45	vacuolar protein sorting 45 homolog [Source:HGNC Symbol;Acc:HGNC:14579]
ENSG00000136643	1.02552939140512	1.81833950282128e-16	RPS6KC1	ribosomal protein S6 kinase C1 [Source:HGNC Symbol;Acc:HGNC:10439]
ENSG00000136689	3.79569833325559	0.000193555013324901	IL1RN	interleukin 1 receptor antagonist [Source:HGNC Symbol;Acc:HGNC:6000]
ENSG00000136695	3.24540389152923	2.57569483772378e-05	IL36RN	interleukin 36 receptor antagonist [Source:HGNC Symbol;Acc:HGNC:15561]
ENSG00000136696	4.50117522330373	1.82954559656722e-27	IL36B	interleukin 36 beta [Source:HGNC Symbol;Acc:HGNC:15564]
ENSG00000136811	-0.4309535894548	1.36359348563772e-05	ODF2	outer dense fiber of sperm tails 2 [Source:HGNC Symbol;Acc:HGNC:8114]
ENSG00000136816	-0.505744611448902	5.12290332777998e-05	TOR1B	torsin family 1 member B [Source:HGNC Symbol;Acc:HGNC:11995]
ENSG00000136824	-0.652193824424151	4.31496105047304e-06	SMC2	structural maintenance of chromosomes 2 [Source:HGNC Symbol;Acc:HGNC:14011]
ENSG00000136826	3.30465242116516	6.93313745921201e-08	KLF4	Kruppel like factor 4 [Source:HGNC Symbol;Acc:HGNC:6348]
ENSG00000136830	-0.382643656619356	5.68016237000602e-06	NIBAN2	niban apoptosis regulator 2 [Source:HGNC Symbol;Acc:HGNC:25282]
ENSG00000136856	-0.713680326184998	1.28125692626728e-06	SLC2A8	solute carrier family 2 member 8 [Source:HGNC Symbol;Acc:HGNC:13812]
ENSG00000136868	1.74984663011281	4.40469750931463e-08	SLC31A1	solute carrier family 31 member 1 [Source:HGNC Symbol;Acc:HGNC:11016]
ENSG00000136869	0.658880176139705	0.000317577815670682	TLR4	toll like receptor 4 [Source:HGNC Symbol;Acc:HGNC:11850]
ENSG00000136875	-0.502335361053242	5.44260072674984e-09	PRPF4	pre-mRNA processing factor 4 [Source:HGNC Symbol;Acc:HGNC:17349]
ENSG00000136877	-0.411626472770477	0.000161096797162454	FPGS	folylpolyglutamate synthase [Source:HGNC Symbol;Acc:HGNC:3824]
ENSG00000136928	1.31223171866863	0.000466971821205792	GABBR2	gamma-aminobutyric acid type B receptor subunit 2 [Source:HGNC Symbol;Acc:HGNC:4507]
ENSG00000136937	-0.399755238422362	2.86850033357532e-05	NCBP1	nuclear cap binding protein subunit 1 [Source:HGNC Symbol;Acc:HGNC:7658]
ENSG00000136943	-0.985936906704037	2.96310932505596e-07	CTSV	cathepsin V [Source:HGNC Symbol;Acc:HGNC:2538]
ENSG00000136960	1.92791269063016	1.82603256589802e-07	ENPP2	ectonucleotide pyrophosphatase/phosphodiesterase 2 [Source:HGNC Symbol;Acc:HGNC:3357]
ENSG00000136982	-0.691399932459106	0.000720385417573166	DSCC1	DNA replication and sister chromatid cohesion 1 [Source:HGNC Symbol;Acc:HGNC:24453]
ENSG00000136999	1.43310048650398	8.84475643304792e-27	CCN3	cellular communication network factor 3 [Source:HGNC Symbol;Acc:HGNC:7885]
ENSG00000137073	-0.507678927969173	0.000877388060779878	UBAP2	ubiquitin associated protein 2 [Source:HGNC Symbol;Acc:HGNC:14185]
ENSG00000137076	-0.451674581021185	0.000140059768763304	TLN1	talin 1 [Source:HGNC Symbol;Acc:HGNC:11845]
ENSG00000137100	-0.598226633689859	3.81121785477392e-05	DCTN3	dynactin subunit 3 [Source:HGNC Symbol;Acc:HGNC:2713]
ENSG00000137124	-1.02678728913694	1.40731735760578e-20	ALDH1B1	aldehyde dehydrogenase 1 family member B1 [Source:HGNC Symbol;Acc:HGNC:407]
ENSG00000137161	-0.625880537981743	1.43963677115215e-11	CNPY3	canopy FGF signaling regulator 3 [Source:HGNC Symbol;Acc:HGNC:11968]
ENSG00000137166	-0.923773798161575	2.83979003657422e-10	FOXP4	forkhead box P4 [Source:HGNC Symbol;Acc:HGNC:20842]
ENSG00000137193	-1.08872128326946	8.44947514304872e-05	PIM1	Pim-1 proto-oncogene, serine/threonine kinase [Source:HGNC Symbol;Acc:HGNC:8986]
ENSG00000137216	-0.42210176813953	0.000318735447637193	TMEM63B	transmembrane protein 63B [Source:HGNC Symbol;Acc:HGNC:17735]
ENSG00000137267	-0.779500274532378	2.15058083142019e-08	TUBB2A	tubulin beta 2A class IIa [Source:HGNC Symbol;Acc:HGNC:12412]
ENSG00000137274	-0.37897488645906	0.00079188628660284	BPHL	biphenyl hydrolase like [Source:HGNC Symbol;Acc:HGNC:1094]
ENSG00000137275	-0.401860298045336	0.000585388687283408	RIPK1	receptor interacting serine/threonine kinase 1 [Source:HGNC Symbol;Acc:HGNC:10019]
ENSG00000137309	2.06672598711439	4.57370064805719e-34	HMGA1	high mobility group AT-hook 1 [Source:HGNC Symbol;Acc:HGNC:5010]
ENSG00000137310	-0.833619388806276	3.92403236764004e-16	TCF19	transcription factor 19 [Source:HGNC Symbol;Acc:HGNC:11629]
ENSG00000137312	-0.875150511445968	3.30675632039364e-11	FLOT1	flotillin 1 [Source:HGNC Symbol;Acc:HGNC:3757]
ENSG00000137331	1.7004081495433	3.39423633948625e-10	IER3	immediate early response 3 [Source:HGNC Symbol;Acc:HGNC:5392]
ENSG00000137338	-0.821237718549787	4.74708297794659e-08	PGBD1	piggyBac transposable element derived 1 [Source:HGNC Symbol;Acc:HGNC:19398]
ENSG00000137364	0.398334650481938	1.35089076402898e-05	TPMT	thiopurine S-methyltransferase [Source:HGNC Symbol;Acc:HGNC:12014]
ENSG00000137393	1.92509928521721	7.17986153735489e-11	RNF144B	ring finger protein 144B [Source:HGNC Symbol;Acc:HGNC:21578]
ENSG00000137404	-1.21452934607259	5.85047681449367e-12	NRM	nurim [Source:HGNC Symbol;Acc:HGNC:8003]
ENSG00000137409	-0.732533554679885	3.43150325523739e-13	MTCH1	mitochondrial carrier 1 [Source:HGNC Symbol;Acc:HGNC:17586]
ENSG00000137449	0.858394125811634	5.04527746183617e-08	CPEB2	cytoplasmic polyadenylation element binding protein 2 [Source:HGNC Symbol;Acc:HGNC:21745]
ENSG00000137460	1.14531838008168	0.000358493464174668	FHDC1	FH2 domain containing 1 [Source:HGNC Symbol;Acc:HGNC:29363]
ENSG00000137478	-0.83208773973043	0.000386232641279157	FCHSD2	FCH and double SH3 domains 2 [Source:HGNC Symbol;Acc:HGNC:29114]
ENSG00000137497	-0.418597022849388	4.16653282690759e-05	NUMA1	nuclear mitotic apparatus protein 1 [Source:HGNC Symbol;Acc:HGNC:8059]
ENSG00000137504	-0.541327173987058	6.66629275364618e-05	CREBZF	CREB/ATF bZIP transcription factor [Source:HGNC Symbol;Acc:HGNC:24905]
ENSG00000137509	-0.417416242109752	0.000189054517913904	PRCP	prolylcarboxypeptidase [Source:HGNC Symbol;Acc:HGNC:9344]
ENSG00000137547	-0.434307872468583	7.76894566317808e-05	MRPL15	mitochondrial ribosomal protein L15 [Source:HGNC Symbol;Acc:HGNC:14054]
ENSG00000137628	2.15995943752115	5.06547571457569e-17	DDX60	DExD/H-box helicase 60 [Source:HGNC Symbol;Acc:HGNC:25942]
ENSG00000137642	1.53805933938176	1.1387742412989e-09	SORL1	sortilin related receptor 1 [Source:HGNC Symbol;Acc:HGNC:11185]
ENSG00000137656	-0.530833623239552	0.000871466619697215	BUD13	BUD13 homolog [Source:HGNC Symbol;Acc:HGNC:28199]
ENSG00000137673	3.12912773555012	5.86851380671905e-09	MMP7	matrix metallopeptidase 7 [Source:HGNC Symbol;Acc:HGNC:7174]
ENSG00000137700	-0.717129386871123	6.51734121551461e-05	SLC37A4	solute carrier family 37 member 4 [Source:HGNC Symbol;Acc:HGNC:4061]
ENSG00000137752	2.36982519477472	5.60214856455013e-07	CASP1	caspase 1 [Source:HGNC Symbol;Acc:HGNC:1499]
ENSG00000137764	0.78909228222361	0.000340596592904976	MAP2K5	mitogen-activated protein kinase kinase 5 [Source:HGNC Symbol;Acc:HGNC:6845]
ENSG00000137767	0.725653640651704	3.05289838098441e-12	SQOR	sulfide quinone oxidoreductase [Source:HGNC Symbol;Acc:HGNC:20390]
ENSG00000137770	-0.461908813441268	0.000332055736233949	CTDSPL2	CTD small phosphatase like 2 [Source:HGNC Symbol;Acc:HGNC:26936]
ENSG00000137801	-1.51264593286878	2.05555023446867e-14	THBS1	thrombospondin 1 [Source:HGNC Symbol;Acc:HGNC:11785]
ENSG00000137812	-0.852340120570683	7.77574642811879e-06	KNL1	kinetochore scaffold 1 [Source:HGNC Symbol;Acc:HGNC:24054]
ENSG00000137814	-0.692297590201342	3.6053369302308e-15	HAUS2	HAUS augmin like complex subunit 2 [Source:HGNC Symbol;Acc:HGNC:25530]
ENSG00000137815	-0.361511184124189	0.000228876129002354	RTF1	RTF1 homolog, Paf1/RNA polymerase II complex component [Source:HGNC Symbol;Acc:HGNC:28996]
ENSG00000137819	3.59554420015331	2.23494501498666e-40	PAQR5	progestin and adipoQ receptor family member 5 [Source:HGNC Symbol;Acc:HGNC:29645]
ENSG00000137821	1.79450088104638	4.66825431517314e-09	LRRC49	leucine rich repeat containing 49 [Source:HGNC Symbol;Acc:HGNC:25965]
ENSG00000137822	-1.08227226257308	7.60373201776674e-08	TUBGCP4	tubulin gamma complex associated protein 4 [Source:HGNC Symbol;Acc:HGNC:16691]
ENSG00000137825	2.23225221207599	2.86917627730959e-10	ITPKA	inositol-trisphosphate 3-kinase A [Source:HGNC Symbol;Acc:HGNC:6178]
ENSG00000137831	-1.38624499551697	2.59972769733046e-12	UACA	uveal autoantigen with coiled-coil domains and ankyrin repeats [Source:HGNC Symbol;Acc:HGNC:15947]
ENSG00000137845	-0.526259226076815	0.000268542910084898	ADAM10	ADAM metallopeptidase domain 10 [Source:HGNC Symbol;Acc:HGNC:188]
ENSG00000137868	2.52052123304533	1.06629987495827e-21	STRA6	stimulated by retinoic acid 6 [Source:HGNC Symbol;Acc:HGNC:30650]
ENSG00000137877	1.78935445161628	9.05134665592327e-06	SPTBN5	spectrin beta, non-erythrocytic 5 [Source:HGNC Symbol;Acc:HGNC:15680]
ENSG00000137944	0.720811483906242	2.56454133396656e-12	KYAT3	kynurenine aminotransferase 3 [Source:HGNC Symbol;Acc:HGNC:33238]
ENSG00000137947	0.637360443074625	5.57780944685274e-07	GTF2B	general transcription factor IIB [Source:HGNC Symbol;Acc:HGNC:4648]
ENSG00000137955	0.85649213383268	2.45730583594034e-05	RABGGTB	Rab geranylgeranyltransferase subunit beta [Source:HGNC Symbol;Acc:HGNC:9796]
ENSG00000137959	3.84554666057163	3.11231167731751e-29	IFI44L	interferon induced protein 44 like [Source:HGNC Symbol;Acc:HGNC:17817]
ENSG00000137962	0.742639233887888	6.11731283949102e-11	ARHGAP29	Rho GTPase activating protein 29 [Source:HGNC Symbol;Acc:HGNC:30207]
ENSG00000137965	3.36807002887285	9.46184857746121e-30	IFI44	interferon induced protein 44 [Source:HGNC Symbol;Acc:HGNC:16938]
ENSG00000137996	0.655876087750762	7.89104685794452e-06	RTCA	RNA 3'-terminal phosphate cyclase [Source:HGNC Symbol;Acc:HGNC:17981]
ENSG00000138029	0.566897213718838	0.000806484218490559	HADHB	hydroxyacyl-CoA dehydrogenase trifunctional multienzyme complex subunit beta [Source:HGNC Symbol;Acc:HGNC:4803]
ENSG00000138031	-0.8940225422133	2.55451348923169e-08	ADCY3	adenylate cyclase 3 [Source:HGNC Symbol;Acc:HGNC:234]
ENSG00000138032	0.725739895018825	3.09667825591129e-17	PPM1B	protein phosphatase, Mg2+/Mn2+ dependent 1B [Source:HGNC Symbol;Acc:HGNC:9276]
ENSG00000138036	0.648007832183186	4.68331155488036e-06	DYNC2LI1	dynein cytoplasmic 2 light intermediate chain 1 [Source:HGNC Symbol;Acc:HGNC:24595]
ENSG00000138061	1.14729697832217	0.000282163311108496	CYP1B1	cytochrome P450 family 1 subfamily B member 1 [Source:HGNC Symbol;Acc:HGNC:2597]
ENSG00000138078	0.983432064853213	8.75490070760827e-06	PREPL	prolyl endopeptidase like [Source:HGNC Symbol;Acc:HGNC:30228]
ENSG00000138079	2.22887333145649	1.9348217297785e-07	SLC3A1	solute carrier family 3 member 1 [Source:HGNC Symbol;Acc:HGNC:11025]
ENSG00000138092	-0.842942865135108	2.27892096039014e-05	CENPO	centromere protein O [Source:HGNC Symbol;Acc:HGNC:28152]
ENSG00000138107	-0.411153176947992	0.000267315934004534	ACTR1A	actin related protein 1A [Source:HGNC Symbol;Acc:HGNC:167]
ENSG00000138111	0.724981730642655	6.24232274352684e-06	MFSD13A	major facilitator superfamily domain containing 13A [Source:HGNC Symbol;Acc:HGNC:26196]
ENSG00000138135	4.10804215296832	3.72828420706147e-12	CH25H	cholesterol 25-hydroxylase [Source:HGNC Symbol;Acc:HGNC:1907]
ENSG00000138152	-1.95500598582828	0.00032731839558864	BTBD16	BTB domain containing 16 [Source:HGNC Symbol;Acc:HGNC:26340]
ENSG00000138160	-0.674371520167175	8.82481673133111e-06	KIF11	kinesin family member 11 [Source:HGNC Symbol;Acc:HGNC:6388]
ENSG00000138162	-1.05723423776147	0.000313238099490212	TACC2	transforming acidic coiled-coil containing protein 2 [Source:HGNC Symbol;Acc:HGNC:11523]
ENSG00000138166	1.10122579338044	1.73540703330332e-06	DUSP5	dual specificity phosphatase 5 [Source:HGNC Symbol;Acc:HGNC:3071]
ENSG00000138180	-0.553723313989559	8.95437948394367e-05	CEP55	centrosomal protein 55 [Source:HGNC Symbol;Acc:HGNC:1161]
ENSG00000138182	-0.767894707098595	6.49638281740859e-05	KIF20B	kinesin family member 20B [Source:HGNC Symbol;Acc:HGNC:7212]
ENSG00000138185	1.35377328214707	0.000707211558046114	ENTPD1	ectonucleoside triphosphate diphosphohydrolase 1 [Source:HGNC Symbol;Acc:HGNC:3363]
ENSG00000138231	-0.432117772797322	0.000380253630803663	DBR1	debranching RNA lariats 1 [Source:HGNC Symbol;Acc:HGNC:15594]
ENSG00000138271	4.5544687749391	4.2081650629276e-05	GPR87	G protein-coupled receptor 87 [Source:HGNC Symbol;Acc:HGNC:4538]
ENSG00000138316	2.21352961924094	0.000356317124013504	ADAMTS14	ADAM metallopeptidase with thrombospondin type 1 motif 14 [Source:HGNC Symbol;Acc:HGNC:14899]
ENSG00000138346	-0.727591141424214	1.6576290536376e-07	DNA2	DNA replication helicase/nuclease 2 [Source:HGNC Symbol;Acc:HGNC:2939]
ENSG00000138347	1.77463769030216	6.05609187536543e-06	MYPN	myopalladin [Source:HGNC Symbol;Acc:HGNC:23246]
ENSG00000138363	0.649223855064845	0.000250220896790225	ATIC	5-aminoimidazole-4-carboxamide ribonucleotide formyltransferase/IMP cyclohydrolase [Source:HGNC Symbol;Acc:HGNC:794]
ENSG00000138413	1.47433627074465	4.95303842793455e-22	IDH1	isocitrate dehydrogenase (NADP(+)) 1, cytosolic [Source:HGNC Symbol;Acc:HGNC:5382]
ENSG00000138433	0.650854700235119	1.17298523797235e-06	CIR1	corepressor interacting with RBPJ, 1 [Source:HGNC Symbol;Acc:HGNC:24217]
ENSG00000138459	0.409707899871542	0.000811782946030794	SLC35A5	solute carrier family 35 member A5 [Source:HGNC Symbol;Acc:HGNC:20792]
ENSG00000138496	0.492542582051682	7.43867605345259e-06	PARP9	poly(ADP-ribose) polymerase family member 9 [Source:HGNC Symbol;Acc:HGNC:24118]
ENSG00000138594	-0.542776452206348	1.21431447520307e-05	TMOD3	tropomodulin 3 [Source:HGNC Symbol;Acc:HGNC:11873]
ENSG00000138615	3.93844804587383	2.91681831640597e-14	CILP	cartilage intermediate layer protein [Source:HGNC Symbol;Acc:HGNC:1980]
ENSG00000138623	-1.09217518885723	1.58298309829917e-10	SEMA7A	semaphorin 7A (John Milton Hagen blood group) [Source:HGNC Symbol;Acc:HGNC:10741]
ENSG00000138640	-0.920952994857703	0.000373677544888355	FAM13A	family with sequence similarity 13 member A [Source:HGNC Symbol;Acc:HGNC:19367]
ENSG00000138641	-1.31418416079023	8.91641697910036e-08	HERC3	HECT and RLD domain containing E3 ubiquitin protein ligase 3 [Source:HGNC Symbol;Acc:HGNC:4876]
ENSG00000138642	1.63421763859051	9.25936673557578e-09	HERC6	HECT and RLD domain containing E3 ubiquitin protein ligase family member 6 [Source:HGNC Symbol;Acc:HGNC:26072]
ENSG00000138646	4.32496958013598	9.87653950654803e-27	HERC5	HECT and RLD domain containing E3 ubiquitin protein ligase 5 [Source:HGNC Symbol;Acc:HGNC:24368]
ENSG00000138650	-2.48030084203438	3.99177202227456e-07	PCDH10	protocadherin 10 [Source:HGNC Symbol;Acc:HGNC:13404]
ENSG00000138658	-0.669671865617213	0.000226993730009304	ZGRF1	zinc finger GRF-type containing 1 [Source:HGNC Symbol;Acc:HGNC:25654]
ENSG00000138663	-0.472614155470346	2.27380409317265e-05	COPS4	COP9 signalosome subunit 4 [Source:HGNC Symbol;Acc:HGNC:16702]
ENSG00000138668	-0.455678060666286	7.18804557780779e-05	HNRNPD	heterogeneous nuclear ribonucleoprotein D [Source:HGNC Symbol;Acc:HGNC:5036]
ENSG00000138670	3.08291903671262	6.13247700469875e-12	RASGEF1B	RasGEF domain family member 1B [Source:HGNC Symbol;Acc:HGNC:24881]
ENSG00000138675	-0.5956086009633	0.000232820808324338	FGF5	fibroblast growth factor 5 [Source:HGNC Symbol;Acc:HGNC:3683]
ENSG00000138685	1.21824147850422	0.000643366771261431	FGF2	fibroblast growth factor 2 [Source:HGNC Symbol;Acc:HGNC:3676]
ENSG00000138698	-0.358497054098736	0.000102361611639888	RAP1GDS1	Rap1 GTPase-GDP dissociation stimulator 1 [Source:HGNC Symbol;Acc:HGNC:9859]
ENSG00000138750	-0.66206803115818	3.13372128325739e-10	NUP54	nucleoporin 54 [Source:HGNC Symbol;Acc:HGNC:17359]
ENSG00000138758	-0.995950936209553	2.51974143354286e-05	SEPTIN11	septin 11 [Source:HGNC Symbol;Acc:HGNC:25589]
ENSG00000138759	1.62602716261672	9.65539178705844e-07	FRAS1	Fraser extracellular matrix complex subunit 1 [Source:HGNC Symbol;Acc:HGNC:19185]
ENSG00000138796	-0.814716210238496	2.02147799319681e-07	HADH	hydroxyacyl-CoA dehydrogenase [Source:HGNC Symbol;Acc:HGNC:4799]
ENSG00000138942	0.54923150742457	0.000912041771214243	RNF185	ring finger protein 185 [Source:HGNC Symbol;Acc:HGNC:26783]
ENSG00000139112	1.22810093811124	1.11226337058833e-30	GABARAPL1	GABA type A receptor associated protein like 1 [Source:HGNC Symbol;Acc:HGNC:4068]
ENSG00000139117	0.593920202119288	1.69236111180724e-05	CPNE8	copine 8 [Source:HGNC Symbol;Acc:HGNC:23498]
ENSG00000139146	0.755237914106549	0.000637837228008687	SINHCAF	SIN3-HDAC complex associated factor [Source:HGNC Symbol;Acc:HGNC:30702]
ENSG00000139173	1.20361526248347	3.95350843256751e-16	TMEM117	transmembrane protein 117 [Source:HGNC Symbol;Acc:HGNC:25308]
ENSG00000139174	0.620776639350318	0.000113789258028919	PRICKLE1	prickle planar cell polarity protein 1 [Source:HGNC Symbol;Acc:HGNC:17019]
ENSG00000139178	0.689014888454215	2.51974143354286e-05	C1RL	complement C1r subcomponent like [Source:HGNC Symbol;Acc:HGNC:21265]
ENSG00000139180	0.462585171082537	0.000341353533954807	NDUFA9	NADH:ubiquinone oxidoreductase subunit A9 [Source:HGNC Symbol;Acc:HGNC:7693]
ENSG00000139192	0.593138851779784	1.51197465085963e-05	TAPBPL	TAP binding protein like [Source:HGNC Symbol;Acc:HGNC:30683]
ENSG00000139269	6.26060685453031	8.50222670769073e-18	INHBE	inhibin subunit beta E [Source:HGNC Symbol;Acc:HGNC:24029]
ENSG00000139289	1.02806378864174	4.38699827901224e-39	PHLDA1	pleckstrin homology like domain family A member 1 [Source:HGNC Symbol;Acc:HGNC:8933]
ENSG00000139318	1.62053955064029	4.62899154179704e-08	DUSP6	dual specificity phosphatase 6 [Source:HGNC Symbol;Acc:HGNC:3072]
ENSG00000139329	1.96681236387318	5.005675968042e-08	LUM	lumican [Source:HGNC Symbol;Acc:HGNC:6724]
ENSG00000139370	-1.49032472225234	2.57902194288439e-16	SLC15A4	solute carrier family 15 member 4 [Source:HGNC Symbol;Acc:HGNC:23090]
ENSG00000139405	-0.857965330999688	8.63607358800401e-09	RITA1	RBPJ interacting and tubulin associated 1 [Source:HGNC Symbol;Acc:HGNC:25925]
ENSG00000139410	1.17064105415544	9.5963292195372e-06	SDSL	serine dehydratase like [Source:HGNC Symbol;Acc:HGNC:30404]
ENSG00000139428	-0.931954916192219	1.75831367945185e-12	MMAB	metabolism of cobalamin associated B [Source:HGNC Symbol;Acc:HGNC:19331]
ENSG00000139438	-1.46653348050219	5.82078600986306e-05	FAM222A	family with sequence similarity 222 member A [Source:HGNC Symbol;Acc:HGNC:25915]
ENSG00000139508	0.781532200960621	1.23562779229848e-07	SLC46A3	solute carrier family 46 member 3 [Source:HGNC Symbol;Acc:HGNC:27501]
ENSG00000139625	0.986134218363668	7.13381003179527e-05	MAP3K12	mitogen-activated protein kinase kinase kinase 12 [Source:HGNC Symbol;Acc:HGNC:6851]
ENSG00000139626	1.50837294840233	6.17491705007342e-06	ITGB7	integrin subunit beta 7 [Source:HGNC Symbol;Acc:HGNC:6162]
ENSG00000139631	0.855905856319588	0.000283707481655521	CSAD	cysteine sulfinic acid decarboxylase [Source:HGNC Symbol;Acc:HGNC:18966]
ENSG00000139637	0.594392344075475	0.000579076827116975	C12orf10	chromosome 12 open reading frame 10 [Source:HGNC Symbol;Acc:HGNC:17590]
ENSG00000139722	-0.414979431579862	0.000307373233001849	VPS37B	VPS37B subunit of ESCRT-I [Source:HGNC Symbol;Acc:HGNC:25754]
ENSG00000139734	-0.860786840287435	7.4129744184233e-07	DIAPH3	diaphanous related formin 3 [Source:HGNC Symbol;Acc:HGNC:15480]
ENSG00000139880	-0.490112055435556	6.2325425882789e-05	CDH24	cadherin 24 [Source:HGNC Symbol;Acc:HGNC:14265]
ENSG00000139915	-1.02019646637952	3.54556161757339e-07	MDGA2	MAM domain containing glycosylphosphatidylinositol anchor 2 [Source:HGNC Symbol;Acc:HGNC:19835]
ENSG00000139921	-0.590486914098595	1.1497378269423e-11	TMX1	thioredoxin related transmembrane protein 1 [Source:HGNC Symbol;Acc:HGNC:15487]
ENSG00000139971	-1.02675969592591	1.22297676969559e-06	ARMH4	armadillo like helical domain containing 4 [Source:HGNC Symbol;Acc:HGNC:19846]
ENSG00000139973	2.70867491655675	2.18740177630815e-07	SYT16	synaptotagmin 16 [Source:HGNC Symbol;Acc:HGNC:23142]
ENSG00000139998	-0.796860961147149	1.5002670447423e-13	RAB15	RAB15, member RAS oncogene family [Source:HGNC Symbol;Acc:HGNC:20150]
ENSG00000140044	1.72817272003433	1.12869560229256e-11	JDP2	Jun dimerization protein 2 [Source:HGNC Symbol;Acc:HGNC:17546]
ENSG00000140105	1.91715581502161	0.000536900964693657	WARS	tryptophanyl-tRNA synthetase [Source:HGNC Symbol;Acc:HGNC:12729]
ENSG00000140153	-0.402319804069467	2.13076623504462e-05	WDR20	WD repeat domain 20 [Source:HGNC Symbol;Acc:HGNC:19667]
ENSG00000140263	-0.338243768061831	0.000370126176600048	SORD	sorbitol dehydrogenase [Source:HGNC Symbol;Acc:HGNC:11184]
ENSG00000140297	1.03143954016698	2.27699782437576e-07	GCNT3	glucosaminyl (N-acetyl) transferase 3, mucin type [Source:HGNC Symbol;Acc:HGNC:4205]
ENSG00000140320	-0.790656600530388	1.12109883262736e-11	BAHD1	bromo adjacent homology domain containing 1 [Source:HGNC Symbol;Acc:HGNC:29153]
ENSG00000140379	2.29746203561487	1.52338651142934e-05	BCL2A1	BCL2 related protein A1 [Source:HGNC Symbol;Acc:HGNC:991]
ENSG00000140386	0.540272170613689	0.000717095546658339	SCAPER	S-phase cyclin A associated protein in the ER [Source:HGNC Symbol;Acc:HGNC:13081]
ENSG00000140391	-0.609240711374799	1.41559479530764e-09	TSPAN3	tetraspanin 3 [Source:HGNC Symbol;Acc:HGNC:17752]
ENSG00000140406	-0.906846781143879	1.53291260578451e-07	TLNRD1	talin rod domain containing 1 [Source:HGNC Symbol;Acc:HGNC:13519]
ENSG00000140416	-0.714613130947525	4.09794694532855e-06	TPM1	tropomyosin 1 [Source:HGNC Symbol;Acc:HGNC:12010]
ENSG00000140443	-0.965127069393114	1.68324352572854e-12	IGF1R	insulin like growth factor 1 receptor [Source:HGNC Symbol;Acc:HGNC:5465]
ENSG00000140450	1.30971733719607	0.000104856176635217	ARRDC4	arrestin domain containing 4 [Source:HGNC Symbol;Acc:HGNC:28087]
ENSG00000140465	2.57266144079598	7.90845401041292e-15	CYP1A1	cytochrome P450 family 1 subfamily A member 1 [Source:HGNC Symbol;Acc:HGNC:2595]
ENSG00000140471	-0.531812108105966	0.000131631145154489	LINS1	lines homolog 1 [Source:HGNC Symbol;Acc:HGNC:30922]
ENSG00000140488	2.01082142988396	7.53900008342664e-05	CELF6	CUGBP Elav-like family member 6 [Source:HGNC Symbol;Acc:HGNC:14059]
ENSG00000140534	-0.787612809584559	5.81818127125819e-05	TICRR	TOPBP1 interacting checkpoint and replication regulator [Source:HGNC Symbol;Acc:HGNC:28704]
ENSG00000140545	0.335594617020659	0.000328717700811128	MFGE8	milk fat globule-EGF factor 8 protein [Source:HGNC Symbol;Acc:HGNC:7036]
ENSG00000140564	-0.5501112115223	1.18346305784947e-07	FURIN	furin, paired basic amino acid cleaving enzyme [Source:HGNC Symbol;Acc:HGNC:8568]
ENSG00000140577	-1.02426743654862	6.86094797578546e-07	CRTC3	CREB regulated transcription coactivator 3 [Source:HGNC Symbol;Acc:HGNC:26148]
ENSG00000140678	1.02614122907385	1.61793026188966e-09	ITGAX	integrin subunit alpha X [Source:HGNC Symbol;Acc:HGNC:6152]
ENSG00000140682	-1.1676026538377	4.27578515661083e-11	TGFB1I1	transforming growth factor beta 1 induced transcript 1 [Source:HGNC Symbol;Acc:HGNC:11767]
ENSG00000140830	0.835905920736993	0.000113289693792927	TXNL4B	thioredoxin like 4B [Source:HGNC Symbol;Acc:HGNC:26041]
ENSG00000140848	-0.862851836165611	1.6737921004908e-09	CPNE2	copine 2 [Source:HGNC Symbol;Acc:HGNC:2315]
ENSG00000140859	-0.429402790069389	0.000267729375482092	KIFC3	kinesin family member C3 [Source:HGNC Symbol;Acc:HGNC:6326]
ENSG00000140873	3.17354142466547	5.16207367154551e-14	ADAMTS18	ADAM metallopeptidase with thrombospondin type 1 motif 18 [Source:HGNC Symbol;Acc:HGNC:17110]
ENSG00000140941	1.58305843097838	2.45630224710173e-06	MAP1LC3B	microtubule associated protein 1 light chain 3 beta [Source:HGNC Symbol;Acc:HGNC:13352]
ENSG00000140945	1.5776740101066	4.76266790551775e-19	CDH13	cadherin 13 [Source:HGNC Symbol;Acc:HGNC:1753]
ENSG00000140950	0.656876896076636	4.730787297981e-07	MEAK7	MTOR associated protein, eak-7 homolog [Source:HGNC Symbol;Acc:HGNC:29325]
ENSG00000140961	0.790172813551462	3.18919060045222e-07	OSGIN1	oxidative stress induced growth inhibitor 1 [Source:HGNC Symbol;Acc:HGNC:30093]
ENSG00000140968	4.67664334040526	6.29162361228745e-25	IRF8	interferon regulatory factor 8 [Source:HGNC Symbol;Acc:HGNC:5358]
ENSG00000140983	-0.524487835429825	6.76428830176505e-07	RHOT2	ras homolog family member T2 [Source:HGNC Symbol;Acc:HGNC:21169]
ENSG00000140995	-0.27856345248951	0.000926982565073507	DEF8	differentially expressed in FDCP 8 homolog [Source:HGNC Symbol;Acc:HGNC:25969]
ENSG00000141068	1.34030072661285	2.55123454229736e-14	KSR1	kinase suppressor of ras 1 [Source:HGNC Symbol;Acc:HGNC:6465]
ENSG00000141198	0.469735297031867	0.000246854559672336	TOM1L1	target of myb1 like 1 membrane trafficking protein [Source:HGNC Symbol;Acc:HGNC:11983]
ENSG00000141252	-0.573108115924496	4.1189787818546e-06	VPS53	VPS53 subunit of GARP complex [Source:HGNC Symbol;Acc:HGNC:25608]
ENSG00000141258	-1.25507528792301	1.77700150747448e-10	SGSM2	small G protein signaling modulator 2 [Source:HGNC Symbol;Acc:HGNC:29026]
ENSG00000141376	0.715083770757344	3.65453843238586e-06	BCAS3	BCAS3 microtubule associated cell migration factor [Source:HGNC Symbol;Acc:HGNC:14347]
ENSG00000141401	-1.21501260458803	0.000106044777007168	IMPA2	inositol monophosphatase 2 [Source:HGNC Symbol;Acc:HGNC:6051]
ENSG00000141429	-0.62659485520069	1.04405471436323e-07	GALNT1	polypeptide N-acetylgalactosaminyltransferase 1 [Source:HGNC Symbol;Acc:HGNC:4123]
ENSG00000141449	3.58402677728705	7.12655412547575e-06	GREB1L	GREB1 like retinoic acid receptor coactivator [Source:HGNC Symbol;Acc:HGNC:31042]
ENSG00000141456	-0.57083761705812	1.45611927272698e-05	PELP1	proline, glutamate and leucine rich protein 1 [Source:HGNC Symbol;Acc:HGNC:30134]
ENSG00000141480	-1.16916675607661	2.40574288382949e-06	ARRB2	arrestin beta 2 [Source:HGNC Symbol;Acc:HGNC:712]
ENSG00000141499	-0.610994710128735	1.36593261993314e-05	WRAP53	WD repeat containing antisense to TP53 [Source:HGNC Symbol;Acc:HGNC:25522]
ENSG00000141503	-1.11012329054484	1.49750573959215e-10	MINK1	misshapen like kinase 1 [Source:HGNC Symbol;Acc:HGNC:17565]
ENSG00000141526	-0.516616824900504	8.2561339457753e-07	SLC16A3	solute carrier family 16 member 3 [Source:HGNC Symbol;Acc:HGNC:10924]
ENSG00000141542	-0.795505966126949	0.00067649131848214	RAB40B	RAB40B, member RAS oncogene family [Source:HGNC Symbol;Acc:HGNC:18284]
ENSG00000141560	-0.693066865809682	0.000506907743128267	FN3KRP	fructosamine 3 kinase related protein [Source:HGNC Symbol;Acc:HGNC:25700]
ENSG00000141582	0.954400386666022	5.7251832293437e-09	CBX4	chromobox 4 [Source:HGNC Symbol;Acc:HGNC:1554]
ENSG00000141646	-0.489589426969121	0.000422901865632547	SMAD4	SMAD family member 4 [Source:HGNC Symbol;Acc:HGNC:6770]
ENSG00000141664	-0.918045476435414	6.48327182261969e-06	ZCCHC2	zinc finger CCHC-type containing 2 [Source:HGNC Symbol;Acc:HGNC:22916]
ENSG00000141682	1.73139048359801	7.93164030851105e-10	PMAIP1	phorbol-12-myristate-13-acetate-induced protein 1 [Source:HGNC Symbol;Acc:HGNC:9108]
ENSG00000141736	-1.05485033360892	1.18785346236439e-06	ERBB2	erb-b2 receptor tyrosine kinase 2 [Source:HGNC Symbol;Acc:HGNC:3430]
ENSG00000141753	-3.14122889411253	2.5817018478304e-18	IGFBP4	insulin like growth factor binding protein 4 [Source:HGNC Symbol;Acc:HGNC:5473]
ENSG00000141837	1.38068853981437	2.00849324681324e-06	CACNA1A	calcium voltage-gated channel subunit alpha1 A [Source:HGNC Symbol;Acc:HGNC:1388]
ENSG00000141858	-1.59104485736244	1.03467890511172e-12	SAMD1	sterile alpha motif domain containing 1 [Source:HGNC Symbol;Acc:HGNC:17958]
ENSG00000141934	1.64023953078061	3.62873962919613e-28	PLPP2	phospholipid phosphatase 2 [Source:HGNC Symbol;Acc:HGNC:9230]
ENSG00000141959	-1.26445815894906	1.16814639382533e-27	PFKL	phosphofructokinase, liver type [Source:HGNC Symbol;Acc:HGNC:8876]
ENSG00000141985	-1.14415677867508	3.06367624296112e-10	SH3GL1	SH3 domain containing GRB2 like 1, endophilin A2 [Source:HGNC Symbol;Acc:HGNC:10830]
ENSG00000142002	-0.567425992998865	0.000115769415115494	DPP9	dipeptidyl peptidase 9 [Source:HGNC Symbol;Acc:HGNC:18648]
ENSG00000142089	0.589619342046588	9.90007841238229e-08	IFITM3	interferon induced transmembrane protein 3 [Source:HGNC Symbol;Acc:HGNC:5414]
ENSG00000142156	1.39060192438879	5.30211406597803e-10	COL6A1	collagen type VI alpha 1 chain [Source:HGNC Symbol;Acc:HGNC:2211]
ENSG00000142173	1.34738879142188	2.39752753646105e-42	COL6A2	collagen type VI alpha 2 chain [Source:HGNC Symbol;Acc:HGNC:2212]
ENSG00000142185	-1.97652805276493	2.00965390454683e-49	TRPM2	transient receptor potential cation channel subfamily M member 2 [Source:HGNC Symbol;Acc:HGNC:12339]
ENSG00000142192	-0.351536561493471	0.000146350738211577	APP	amyloid beta precursor protein [Source:HGNC Symbol;Acc:HGNC:620]
ENSG00000142208	-0.996498364175954	4.58298349768556e-35	AKT1	AKT serine/threonine kinase 1 [Source:HGNC Symbol;Acc:HGNC:391]
ENSG00000142227	-0.614423948773572	5.39221629886986e-05	EMP3	epithelial membrane protein 3 [Source:HGNC Symbol;Acc:HGNC:3335]
ENSG00000142230	-0.590589674920653	5.98893928191555e-09	SAE1	SUMO1 activating enzyme subunit 1 [Source:HGNC Symbol;Acc:HGNC:30660]
ENSG00000142252	-0.532877648966322	0.000273278184001072	GEMIN7	gem nuclear organelle associated protein 7 [Source:HGNC Symbol;Acc:HGNC:20045]
ENSG00000142409	-0.660572870086272	2.10570786828095e-05	ZNF787	zinc finger protein 787 [Source:HGNC Symbol;Acc:HGNC:26998]
ENSG00000142453	-0.55322086061858	6.75095189796311e-10	CARM1	coactivator associated arginine methyltransferase 1 [Source:HGNC Symbol;Acc:HGNC:23393]
ENSG00000142507	-0.594044262601071	0.000130188537908797	PSMB6	proteasome subunit beta 6 [Source:HGNC Symbol;Acc:HGNC:9543]
ENSG00000142556	-0.43538113531654	0.000714774090052584	ZNF614	zinc finger protein 614 [Source:HGNC Symbol;Acc:HGNC:24722]
ENSG00000142583	2.31505390689242	1.00824803586815e-13	SLC2A5	solute carrier family 2 member 5 [Source:HGNC Symbol;Acc:HGNC:11010]
ENSG00000142619	1.66325661742238	2.37066865536992e-05	PADI3	peptidyl arginine deiminase 3 [Source:HGNC Symbol;Acc:HGNC:18337]
ENSG00000142634	-0.765479109764579	6.03130717961071e-11	EFHD2	EF-hand domain family member D2 [Source:HGNC Symbol;Acc:HGNC:28670]
ENSG00000142661	0.435266965804597	2.09700711971707e-05	MYOM3	myomesin 3 [Source:HGNC Symbol;Acc:HGNC:26679]
ENSG00000142694	-1.25230125034575	0.000185584445741289	EVA1B	eva-1 homolog B [Source:HGNC Symbol;Acc:HGNC:25558]
ENSG00000142731	-0.721882761570652	2.11797807693466e-05	PLK4	polo like kinase 4 [Source:HGNC Symbol;Acc:HGNC:11397]
ENSG00000142765	5.13676674499469	9.38405613836711e-07	SYTL1	synaptotagmin like 1 [Source:HGNC Symbol;Acc:HGNC:15584]
ENSG00000142875	0.6648490062934	1.33000657922306e-05	PRKACB	protein kinase cAMP-activated catalytic subunit beta [Source:HGNC Symbol;Acc:HGNC:9381]
ENSG00000142892	0.698375804764281	8.91274485435223e-15	PIGK	phosphatidylinositol glycan anchor biosynthesis class K [Source:HGNC Symbol;Acc:HGNC:8965]
ENSG00000142910	0.730561633123234	3.7558375238033e-09	TINAGL1	tubulointerstitial nephritis antigen like 1 [Source:HGNC Symbol;Acc:HGNC:19168]
ENSG00000142949	-1.11258932103755	3.26194143168853e-21	PTPRF	protein tyrosine phosphatase receptor type F [Source:HGNC Symbol;Acc:HGNC:9670]
ENSG00000143013	1.31975227967825	6.79925640398698e-08	LMO4	LIM domain only 4 [Source:HGNC Symbol;Acc:HGNC:6644]
ENSG00000143067	1.59391059368996	2.16085484481863e-12	ZNF697	zinc finger protein 697 [Source:HGNC Symbol;Acc:HGNC:32034]
ENSG00000143147	-1.49911470974129	1.89272268021766e-07	GPR161	G protein-coupled receptor 161 [Source:HGNC Symbol;Acc:HGNC:23694]
ENSG00000143149	1.10790664030884	3.08602446732089e-17	ALDH9A1	aldehyde dehydrogenase 9 family member A1 [Source:HGNC Symbol;Acc:HGNC:412]
ENSG00000143153	-1.12589624258323	6.13701183825153e-11	ATP1B1	ATPase Na+/K+ transporting subunit beta 1 [Source:HGNC Symbol;Acc:HGNC:804]
ENSG00000143155	0.588275370000486	1.72278132476998e-07	TIPRL	TOR signaling pathway regulator [Source:HGNC Symbol;Acc:HGNC:30231]
ENSG00000143162	1.0748297193921	1.28707167814116e-14	CREG1	cellular repressor of E1A stimulated genes 1 [Source:HGNC Symbol;Acc:HGNC:2351]
ENSG00000143178	0.853686912649493	0.000127140737773721	TBX19	T-box transcription factor 19 [Source:HGNC Symbol;Acc:HGNC:11596]
ENSG00000143183	0.396736602706065	0.00049210727830301	TMCO1	transmembrane and coiled-coil domains 1 [Source:HGNC Symbol;Acc:HGNC:18188]
ENSG00000143198	0.48029799836517	0.000867774620456402	MGST3	microsomal glutathione S-transferase 3 [Source:HGNC Symbol;Acc:HGNC:7064]
ENSG00000143217	2.58983526394069	1.0632707774628e-08	NECTIN4	nectin cell adhesion molecule 4 [Source:HGNC Symbol;Acc:HGNC:19688]
ENSG00000143222	0.859184829070955	2.58084385853302e-13	UFC1	ubiquitin-fold modifier conjugating enzyme 1 [Source:HGNC Symbol;Acc:HGNC:26941]
ENSG00000143224	0.53658286456188	0.000160064294375928	PPOX	protoporphyrinogen oxidase [Source:HGNC Symbol;Acc:HGNC:9280]
[truncated: 2,825 more rows]

## Sheet: EV_vs_WT
Gene	log2FoldChange	padj	hgnc_symbol	description
ENSG00000000457	0.444843366553603	5.14865065966133e-05	SCYL3	SCY1 like pseudokinase 3 [Source:HGNC Symbol;Acc:HGNC:19285]
ENSG00000000971	1.16068067712157	1.23604362491188e-19	CFH	complement factor H [Source:HGNC Symbol;Acc:HGNC:4883]
ENSG00000001461	0.452347819720779	1.64324096732831e-12	NIPAL3	NIPA like domain containing 3 [Source:HGNC Symbol;Acc:HGNC:25233]
ENSG00000001617	1.9352423605729	3.67733755329264e-49	SEMA3F	semaphorin 3F [Source:HGNC Symbol;Acc:HGNC:10728]
ENSG00000002079	-0.661316626817016	0.000452794683838494	MYH16	myosin heavy chain 16 pseudogene [Source:HGNC Symbol;Acc:HGNC:31038]
ENSG00000002330	-1.07075941465772	1.5841988976049e-07	BAD	BCL2 associated agonist of cell death [Source:HGNC Symbol;Acc:HGNC:936]
ENSG00000002586	-1.6603859133535	1.14108989996629e-57	CD99	CD99 molecule (Xg blood group) [Source:HGNC Symbol;Acc:HGNC:7082]
ENSG00000002834	-0.799995688429733	1.6883449656908e-10	LASP1	LIM and SH3 protein 1 [Source:HGNC Symbol;Acc:HGNC:6513]
ENSG00000003096	1.28736353827321	1.10501611543994e-07	KLHL13	kelch like family member 13 [Source:HGNC Symbol;Acc:HGNC:22931]
ENSG00000003249	-1.33147847404532	1.55644315580084e-11	DBNDD1	dysbindin domain containing 1 [Source:HGNC Symbol;Acc:HGNC:28455]
ENSG00000003756	-0.392860035873858	2.96288495660881e-06	RBM5	RNA binding motif protein 5 [Source:HGNC Symbol;Acc:HGNC:9902]
ENSG00000003987	3.28747276721223	0.000132743522832028	MTMR7	myotubularin related protein 7 [Source:HGNC Symbol;Acc:HGNC:7454]
ENSG00000004059	-0.808756932720908	1.4730922554343e-27	ARF5	ADP ribosylation factor 5 [Source:HGNC Symbol;Acc:HGNC:658]
ENSG00000004139	0.950665163917074	1.14544108115162e-07	SARM1	sterile alpha and TIR motif containing 1 [Source:HGNC Symbol;Acc:HGNC:17074]
ENSG00000004478	-0.576499430322056	6.09166141580249e-09	FKBP4	FKBP prolyl isomerase 4 [Source:HGNC Symbol;Acc:HGNC:3720]
ENSG00000004487	-0.827818060169019	1.29432197430844e-14	KDM1A	lysine demethylase 1A [Source:HGNC Symbol;Acc:HGNC:29079]
ENSG00000004534	-0.584956614948785	3.46027004182435e-07	RBM6	RNA binding motif protein 6 [Source:HGNC Symbol;Acc:HGNC:9903]
ENSG00000004660	-1.08414437658851	2.88384834884004e-16	CAMKK1	calcium/calmodulin dependent protein kinase kinase 1 [Source:HGNC Symbol;Acc:HGNC:1469]
ENSG00000004777	-1.838316494432	3.36810065225715e-25	ARHGAP33	Rho GTPase activating protein 33 [Source:HGNC Symbol;Acc:HGNC:23085]
ENSG00000004864	-0.39854839939699	1.36624454171885e-08	SLC25A13	solute carrier family 25 member 13 [Source:HGNC Symbol;Acc:HGNC:10983]
ENSG00000004975	-0.811022614977788	5.14016615655794e-22	DVL2	dishevelled segment polarity protein 2 [Source:HGNC Symbol;Acc:HGNC:3086]
ENSG00000005007	-0.367601053423824	5.59919039925493e-08	UPF1	UPF1 RNA helicase and ATPase [Source:HGNC Symbol;Acc:HGNC:9962]
ENSG00000005059	-0.813959002207663	4.47122198604265e-19	MCUB	mitochondrial calcium uniporter dominant negative beta subunit [Source:HGNC Symbol;Acc:HGNC:26076]
ENSG00000005075	-0.391323139815867	5.81136397808879e-07	POLR2J	RNA polymerase II subunit J [Source:HGNC Symbol;Acc:HGNC:9197]
ENSG00000005100	-0.599885173538497	0.000915763364522157	DHX33	DEAH-box helicase 33 [Source:HGNC Symbol;Acc:HGNC:16718]
ENSG00000005156	-0.52841787767844	0.00032537131178476	LIG3	DNA ligase 3 [Source:HGNC Symbol;Acc:HGNC:6600]
ENSG00000005187	1.08504439837005	7.28434448123033e-17	ACSM3	acyl-CoA synthetase medium chain family member 3 [Source:HGNC Symbol;Acc:HGNC:10522]
ENSG00000005189	-0.437340252389384	0.000112072565505999	REXO5	RNA exonuclease 5 [Source:HGNC Symbol;Acc:HGNC:24661]
ENSG00000005249	-1.06783726855056	3.45478013359353e-14	PRKAR2B	protein kinase cAMP-dependent type II regulatory subunit beta [Source:HGNC Symbol;Acc:HGNC:9392]
ENSG00000005421	5.16340946399051	0.000652082770447413	PON1	paraoxonase 1 [Source:HGNC Symbol;Acc:HGNC:9204]
ENSG00000005448	-0.691719192453541	1.92895699306142e-11	WDR54	WD repeat domain 54 [Source:HGNC Symbol;Acc:HGNC:25770]
ENSG00000005471	2.63321075479647	3.95221814081901e-05	ABCB4	ATP binding cassette subfamily B member 4 [Source:HGNC Symbol;Acc:HGNC:45]
ENSG00000005812	-0.511610817759025	2.38274839307979e-12	FBXL3	F-box and leucine rich repeat protein 3 [Source:HGNC Symbol;Acc:HGNC:13599]
ENSG00000005884	-0.371057984183769	1.68244893520365e-06	ITGA3	integrin subunit alpha 3 [Source:HGNC Symbol;Acc:HGNC:6139]
ENSG00000006007	0.357309338021299	0.000380909501811531	GDE1	glycerophosphodiester phosphodiesterase 1 [Source:HGNC Symbol;Acc:HGNC:29644]
ENSG00000006062	-0.591558790499845	6.43610477069775e-18	MAP3K14	mitogen-activated protein kinase kinase kinase 14 [Source:HGNC Symbol;Acc:HGNC:6853]
ENSG00000006327	0.505973009287606	3.66762177681673e-05	TNFRSF12A	TNF receptor superfamily member 12A [Source:HGNC Symbol;Acc:HGNC:18152]
ENSG00000006432	-1.47250007819335	3.19028754304918e-12	MAP3K9	mitogen-activated protein kinase kinase kinase 9 [Source:HGNC Symbol;Acc:HGNC:6861]
ENSG00000006451	-0.600741763138704	3.23089158323852e-11	RALA	RAS like proto-oncogene A [Source:HGNC Symbol;Acc:HGNC:9839]
ENSG00000006459	1.79693132163376	2.27423275679973e-09	KDM7A	lysine demethylase 7A [Source:HGNC Symbol;Acc:HGNC:22224]
ENSG00000006576	-1.15244997866855	1.38821225944402e-48	PHTF2	putative homeodomain transcription factor 2 [Source:HGNC Symbol;Acc:HGNC:13411]
ENSG00000006606	3.01516787694877	9.43596370588108e-10	CCL26	C-C motif chemokine ligand 26 [Source:HGNC Symbol;Acc:HGNC:10625]
ENSG00000006607	-0.495329614987549	1.18180877658308e-09	FARP2	FERM, ARH/RhoGEF and pleckstrin domain protein 2 [Source:HGNC Symbol;Acc:HGNC:16460]
ENSG00000006634	-0.579332160548864	1.72467799438432e-05	DBF4	DBF4 zinc finger [Source:HGNC Symbol;Acc:HGNC:17364]
ENSG00000006712	-0.580318574125267	7.7001517921042e-09	PAF1	PAF1 homolog, Paf1/RNA polymerase II complex component [Source:HGNC Symbol;Acc:HGNC:25459]
ENSG00000006744	-0.521061958108678	2.09028076862696e-09	ELAC2	elaC ribonuclease Z 2 [Source:HGNC Symbol;Acc:HGNC:14198]
ENSG00000006788	-5.58871062858185	1.67034467586742e-53	MYH13	myosin heavy chain 13 [Source:HGNC Symbol;Acc:HGNC:7571]
ENSG00000007047	-0.744469527444541	1.20032081389494e-08	MARK4	microtubule affinity regulating kinase 4 [Source:HGNC Symbol;Acc:HGNC:13538]
ENSG00000007168	-0.727196155977198	1.26532715486843e-08	PAFAH1B1	platelet activating factor acetylhydrolase 1b regulatory subunit 1 [Source:HGNC Symbol;Acc:HGNC:8574]
ENSG00000007216	4.86622740470903	4.44290421650193e-05	SLC13A2	solute carrier family 13 member 2 [Source:HGNC Symbol;Acc:HGNC:10917]
ENSG00000007314	3.5387001277959	5.26358516126465e-07	SCN4A	sodium voltage-gated channel alpha subunit 4 [Source:HGNC Symbol;Acc:HGNC:10591]
ENSG00000007372	-0.610156732254518	2.90648615481402e-05	PAX6	paired box 6 [Source:HGNC Symbol;Acc:HGNC:8620]
ENSG00000007376	-0.387330513181341	4.61213832990332e-06	RPUSD1	RNA pseudouridine synthase domain containing 1 [Source:HGNC Symbol;Acc:HGNC:14173]
ENSG00000007520	-0.296834968612943	0.0007028378173058	TSR3	TSR3 ribosome maturation factor [Source:HGNC Symbol;Acc:HGNC:14175]
ENSG00000007968	-0.969025032756891	6.50735557436952e-05	E2F2	E2F transcription factor 2 [Source:HGNC Symbol;Acc:HGNC:3114]
ENSG00000008086	-0.81374339681208	6.56335111796503e-06	CDKL5	cyclin dependent kinase like 5 [Source:HGNC Symbol;Acc:HGNC:11411]
ENSG00000008130	-0.326548010160944	5.12391740284576e-06	NADK	NAD kinase [Source:HGNC Symbol;Acc:HGNC:29831]
ENSG00000008282	-0.333770013452721	8.471157119973e-06	SYPL1	synaptophysin like 1 [Source:HGNC Symbol;Acc:HGNC:11507]
ENSG00000008283	-0.545471696503439	2.33415706572404e-05	CYB561	cytochrome b561 [Source:HGNC Symbol;Acc:HGNC:2571]
ENSG00000008311	-0.44521236952739	1.71237598325962e-07	AASS	aminoadipate-semialdehyde synthase [Source:HGNC Symbol;Acc:HGNC:17366]
ENSG00000008394	1.004687717238	1.07837955341463e-15	MGST1	microsomal glutathione S-transferase 1 [Source:HGNC Symbol;Acc:HGNC:7061]
ENSG00000008513	0.560589501410446	1.21177500881231e-05	ST3GAL1	ST3 beta-galactoside alpha-2,3-sialyltransferase 1 [Source:HGNC Symbol;Acc:HGNC:10862]
ENSG00000008517	0.326701334471978	7.35242083430937e-05	IL32	interleukin 32 [Source:HGNC Symbol;Acc:HGNC:16830]
ENSG00000008838	-0.308712993791345	1.89273145720537e-05	MED24	mediator complex subunit 24 [Source:HGNC Symbol;Acc:HGNC:22963]
ENSG00000008853	-1.39179759952992	6.88512068482703e-14	RHOBTB2	Rho related BTB domain containing 2 [Source:HGNC Symbol;Acc:HGNC:18756]
ENSG00000009335	-0.531532864253488	1.86521486720444e-10	UBE3C	ubiquitin protein ligase E3C [Source:HGNC Symbol;Acc:HGNC:16803]
ENSG00000009694	3.13041276045815	2.8079560222055e-06	TENM1	teneurin transmembrane protein 1 [Source:HGNC Symbol;Acc:HGNC:8117]
ENSG00000009780	-0.58900473103418	7.03167567469706e-05	FAM76A	family with sequence similarity 76 member A [Source:HGNC Symbol;Acc:HGNC:28530]
ENSG00000009844	-0.377201436570009	3.84654432164504e-08	VTA1	vesicle trafficking 1 [Source:HGNC Symbol;Acc:HGNC:20954]
ENSG00000009950	2.05074165559092	0.000584921053863257	MLXIPL	MLX interacting protein like [Source:HGNC Symbol;Acc:HGNC:12744]
ENSG00000010017	-0.511169851486487	5.55623611947509e-09	RANBP9	RAN binding protein 9 [Source:HGNC Symbol;Acc:HGNC:13727]
ENSG00000010030	3.67308412271038	3.74406881284771e-10	ETV7	ETS variant 7 [Source:HGNC Symbol;Acc:HGNC:18160]
ENSG00000010244	-0.373909360886019	5.22552111559014e-06	ZNF207	zinc finger protein 207 [Source:HGNC Symbol;Acc:HGNC:12998]
ENSG00000010256	-0.335226128107775	0.000473749283225187	UQCRC1	ubiquinol-cytochrome c reductase core protein 1 [Source:HGNC Symbol;Acc:HGNC:12585]
ENSG00000010270	-0.399515832640083	1.33995886920572e-08	STARD3NL	STARD3 N-terminal like [Source:HGNC Symbol;Acc:HGNC:19169]
ENSG00000010292	-0.591588273152867	1.93930311052878e-17	NCAPD2	non-SMC condensin I complex subunit D2 [Source:HGNC Symbol;Acc:HGNC:24305]
ENSG00000010318	-0.549431061507156	0.000111626344757695	PHF7	PHD finger protein 7 [Source:HGNC Symbol;Acc:HGNC:18458]
ENSG00000010322	-0.333802662277443	0.000267535006552264	NISCH	nischarin [Source:HGNC Symbol;Acc:HGNC:18006]
ENSG00000010379	1.39575972087801	8.11837915020886e-05	SLC6A13	solute carrier family 6 member 13 [Source:HGNC Symbol;Acc:HGNC:11046]
ENSG00000010404	-0.340309511757825	7.46020467171827e-05	IDS	iduronate 2-sulfatase [Source:HGNC Symbol;Acc:HGNC:5389]
ENSG00000011028	-0.439973432180693	2.48063581298386e-08	MRC2	mannose receptor C type 2 [Source:HGNC Symbol;Acc:HGNC:16875]
ENSG00000011105	-1.04236180948689	6.90772400956544e-09	TSPAN9	tetraspanin 9 [Source:HGNC Symbol;Acc:HGNC:21640]
ENSG00000011114	-0.868167979552721	2.37717990808481e-09	BTBD7	BTB domain containing 7 [Source:HGNC Symbol;Acc:HGNC:18269]
ENSG00000011304	-0.418014081791537	0.000514824508335331	PTBP1	polypyrimidine tract binding protein 1 [Source:HGNC Symbol;Acc:HGNC:9583]
ENSG00000011376	-0.386187497970979	1.51356851041311e-05	LARS2	leucyl-tRNA synthetase 2, mitochondrial [Source:HGNC Symbol;Acc:HGNC:17095]
ENSG00000011426	-1.51171344225597	4.99819234017641e-22	ANLN	anillin actin binding protein [Source:HGNC Symbol;Acc:HGNC:14082]
ENSG00000011485	-0.370942008663079	0.000131001997130073	PPP5C	protein phosphatase 5 catalytic subunit [Source:HGNC Symbol;Acc:HGNC:9322]
ENSG00000011566	0.737542246665972	3.01545114111096e-05	MAP4K3	mitogen-activated protein kinase kinase kinase kinase 3 [Source:HGNC Symbol;Acc:HGNC:6865]
ENSG00000011638	0.633993608543637	5.85325060300719e-07	TMEM159	transmembrane protein 159 [Source:HGNC Symbol;Acc:HGNC:30136]
ENSG00000011677	6.84865428511198	8.24263532398294e-07	GABRA3	gamma-aminobutyric acid type A receptor alpha3 subunit [Source:HGNC Symbol;Acc:HGNC:4077]
ENSG00000012124	3.15994951361478	6.60202297134745e-98	CD22	CD22 molecule [Source:HGNC Symbol;Acc:HGNC:1643]
ENSG00000012504	2.76640157354044	4.85886194298834e-21	NR1H4	nuclear receptor subfamily 1 group H member 4 [Source:HGNC Symbol;Acc:HGNC:7967]
ENSG00000012660	-0.318584102552519	0.000638328924395182	ELOVL5	ELOVL fatty acid elongase 5 [Source:HGNC Symbol;Acc:HGNC:21308]
ENSG00000012779	-1.56277589432498	6.30022839127504e-08	ALOX5	arachidonate 5-lipoxygenase [Source:HGNC Symbol;Acc:HGNC:435]
ENSG00000012817	0.375014726364445	1.26984796313108e-05	KDM5D	lysine demethylase 5D [Source:HGNC Symbol;Acc:HGNC:11115]
ENSG00000012822	0.877442022468049	1.08614741640658e-07	CALCOCO1	calcium binding and coiled-coil domain 1 [Source:HGNC Symbol;Acc:HGNC:29306]
ENSG00000012963	-1.16126418311319	4.82297116515784e-29	UBR7	ubiquitin protein ligase E3 component n-recognin 7 (putative) [Source:HGNC Symbol;Acc:HGNC:20344]
ENSG00000013288	-0.404872831603612	1.83836198411414e-09	MAN2B2	mannosidase alpha class 2B member 2 [Source:HGNC Symbol;Acc:HGNC:29623]
ENSG00000013563	-0.317434438938387	0.000342245406308461	DNASE1L1	deoxyribonuclease 1 like 1 [Source:HGNC Symbol;Acc:HGNC:2957]
ENSG00000013573	-0.562233589490558	6.3234323198447e-13	DDX11	DEAD/H-box helicase 11 [Source:HGNC Symbol;Acc:HGNC:2736]
ENSG00000013583	0.277806783624683	3.73599121424125e-05	HEBP1	heme binding protein 1 [Source:HGNC Symbol;Acc:HGNC:17176]
ENSG00000013588	0.825616192976103	9.29281506289416e-06	GPRC5A	G protein-coupled receptor class C group 5 member A [Source:HGNC Symbol;Acc:HGNC:9836]
ENSG00000013619	-1.01411955297632	1.36422587388056e-18	MAMLD1	mastermind like domain containing 1 [Source:HGNC Symbol;Acc:HGNC:2568]
ENSG00000013810	-1.25427195387797	3.39924968133898e-63	TACC3	transforming acidic coiled-coil containing protein 3 [Source:HGNC Symbol;Acc:HGNC:11524]
ENSG00000014138	-0.589968446216713	3.19942514792725e-13	POLA2	DNA polymerase alpha 2, accessory subunit [Source:HGNC Symbol;Acc:HGNC:30073]
ENSG00000014164	-0.557304322753443	3.06769015526028e-08	ZC3H3	zinc finger CCCH-type containing 3 [Source:HGNC Symbol;Acc:HGNC:28972]
ENSG00000014914	-0.938890657355152	0.000102553032117952	MTMR11	myotubularin related protein 11 [Source:HGNC Symbol;Acc:HGNC:24307]
ENSG00000015133	-1.1358071167829	1.19047453555645e-28	CCDC88C	coiled-coil domain containing 88C [Source:HGNC Symbol;Acc:HGNC:19967]
ENSG00000015475	0.54788078466396	9.44078423198611e-12	BID	BH3 interacting domain death agonist [Source:HGNC Symbol;Acc:HGNC:1050]
ENSG00000015479	-0.50163704612717	4.70410027807963e-15	MATR3	matrin 3 [Source:HGNC Symbol;Acc:HGNC:6912]
ENSG00000015520	1.83902903251175	0.000120417103222739	NPC1L1	NPC1 like intracellular cholesterol transporter 1 [Source:HGNC Symbol;Acc:HGNC:7898]
ENSG00000015532	-0.615352425015849	8.18973434627969e-09	XYLT2	xylosyltransferase 2 [Source:HGNC Symbol;Acc:HGNC:15517]
ENSG00000015568	1.34470950361157	1.06825977916611e-13	RGPD5	RANBP2 like and GRIP domain containing 5 [Source:HGNC Symbol;Acc:HGNC:32418]
ENSG00000015676	-0.527425901942884	3.86529001260864e-17	NUDCD3	NudC domain containing 3 [Source:HGNC Symbol;Acc:HGNC:22208]
ENSG00000016602	4.5366518056762	0.000922527030042272	CLCA4	chloride channel accessory 4 [Source:HGNC Symbol;Acc:HGNC:2018]
ENSG00000016864	-0.596078831281821	4.10710733434236e-07	GLT8D1	glycosyltransferase 8 domain containing 1 [Source:HGNC Symbol;Acc:HGNC:24870]
ENSG00000017260	-0.480037103122889	1.27461362457462e-09	ATP2C1	ATPase secretory pathway Ca2+ transporting 1 [Source:HGNC Symbol;Acc:HGNC:13211]
ENSG00000017797	-0.672593043751822	1.3865250735876e-23	RALBP1	ralA binding protein 1 [Source:HGNC Symbol;Acc:HGNC:9841]
ENSG00000018189	0.754188581234037	5.25695692833269e-06	RUFY3	RUN and FYVE domain containing 3 [Source:HGNC Symbol;Acc:HGNC:30285]
ENSG00000018236	2.37099686164714	3.30445922014936e-05	CNTN1	contactin 1 [Source:HGNC Symbol;Acc:HGNC:2171]
ENSG00000018408	-0.713861704534247	2.40870198481334e-15	WWTR1	WW domain containing transcription regulator 1 [Source:HGNC Symbol;Acc:HGNC:24042]
ENSG00000018625	4.49977267172196	2.41440420078031e-12	ATP1A2	ATPase Na+/K+ transporting subunit alpha 2 [Source:HGNC Symbol;Acc:HGNC:800]
ENSG00000019169	4.62294749675364	3.12971431904689e-13	MARCO	macrophage receptor with collagenous structure [Source:HGNC Symbol;Acc:HGNC:6895]
ENSG00000019485	-0.655496943695674	2.86013526073126e-07	PRDM11	PR/SET domain 11 [Source:HGNC Symbol;Acc:HGNC:13996]
ENSG00000019549	0.713252739289291	0.000104999103135871	SNAI2	snail family transcriptional repressor 2 [Source:HGNC Symbol;Acc:HGNC:11094]
ENSG00000019582	1.10405344901865	3.4615024117607e-41	CD74	CD74 molecule [Source:HGNC Symbol;Acc:HGNC:1697]
ENSG00000020256	-0.595282497796477	0.000138720644977209	ZFP64	ZFP64 zinc finger protein [Source:HGNC Symbol;Acc:HGNC:15940]
ENSG00000020922	-0.584130596364633	7.79859470938783e-08	MRE11	MRE11 homolog, double strand break repair nuclease [Source:HGNC Symbol;Acc:HGNC:7230]
ENSG00000021300	1.26610888495576	1.47546481377396e-11	PLEKHB1	pleckstrin homology domain containing B1 [Source:HGNC Symbol;Acc:HGNC:19079]
ENSG00000021645	-1.11890415261198	1.04959554089148e-15	NRXN3	neurexin 3 [Source:HGNC Symbol;Acc:HGNC:8010]
ENSG00000021762	-1.80949200588572	1.21062110628308e-19	OSBPL5	oxysterol binding protein like 5 [Source:HGNC Symbol;Acc:HGNC:16392]
ENSG00000021826	-0.710107899627026	4.23494939057393e-17	CPS1	carbamoyl-phosphate synthase 1 [Source:HGNC Symbol;Acc:HGNC:2323]
ENSG00000022267	-0.344546036447118	0.00036467838873047	FHL1	four and a half LIM domains 1 [Source:HGNC Symbol;Acc:HGNC:3702]
ENSG00000023445	1.08004656322582	5.3067548526249e-23	BIRC3	baculoviral IAP repeat containing 3 [Source:HGNC Symbol;Acc:HGNC:591]
ENSG00000023572	0.813517905806004	4.92227787571532e-05	GLRX2	glutaredoxin 2 [Source:HGNC Symbol;Acc:HGNC:16065]
ENSG00000023608	1.01643834677487	6.33519634221462e-08	SNAPC1	small nuclear RNA activating complex polypeptide 1 [Source:HGNC Symbol;Acc:HGNC:11134]
ENSG00000023697	-0.274425848321549	0.000992749652261218	DERA	deoxyribose-phosphate aldolase [Source:HGNC Symbol;Acc:HGNC:24269]
ENSG00000023839	2.25836545584439	8.58871811021419e-37	ABCC2	ATP binding cassette subfamily C member 2 [Source:HGNC Symbol;Acc:HGNC:53]
ENSG00000024422	-2.79735301023005	2.86951554345544e-20	EHD2	EH domain containing 2 [Source:HGNC Symbol;Acc:HGNC:3243]
ENSG00000025039	0.720186800937717	4.1446743087e-07	RRAGD	Ras related GTP binding D [Source:HGNC Symbol;Acc:HGNC:19903]
ENSG00000025293	-0.367040555570533	0.000768794336260116	PHF20	PHD finger protein 20 [Source:HGNC Symbol;Acc:HGNC:16098]
ENSG00000025770	-0.71433530960821	1.25168961695539e-10	NCAPH2	non-SMC condensin II complex subunit H2 [Source:HGNC Symbol;Acc:HGNC:25071]
ENSG00000026025	-1.03480518605044	3.30298550034247e-66	VIM	vimentin [Source:HGNC Symbol;Acc:HGNC:12692]
ENSG00000026036	-0.979387926856789	3.46617646544304e-16	RTEL1-TNFRSF6B	RTEL1-TNFRSF6B readthrough (NMD candidate) [Source:HGNC Symbol;Acc:HGNC:44095]
ENSG00000026297	-2.75696392933378	4.02427208375723e-32	RNASET2	ribonuclease T2 [Source:HGNC Symbol;Acc:HGNC:21686]
ENSG00000026559	3.92213103396929	0.000821299735357272	KCNG1	potassium voltage-gated channel modifier subfamily G member 1 [Source:HGNC Symbol;Acc:HGNC:6248]
ENSG00000026652	0.414499582522513	0.000141513703595283	AGPAT4	1-acylglycerol-3-phosphate O-acyltransferase 4 [Source:HGNC Symbol;Acc:HGNC:20885]
ENSG00000027001	-0.529384916452371	6.21197418917148e-08	MIPEP	mitochondrial intermediate peptidase [Source:HGNC Symbol;Acc:HGNC:7104]
ENSG00000027075	1.3715591642204	5.91501922519897e-13	PRKCH	protein kinase C eta [Source:HGNC Symbol;Acc:HGNC:9403]
ENSG00000027697	0.485968927281367	8.49542275809835e-06	IFNGR1	interferon gamma receptor 1 [Source:HGNC Symbol;Acc:HGNC:5439]
ENSG00000027847	-0.334545453224679	0.000320976622122834	B4GALT7	beta-1,4-galactosyltransferase 7 [Source:HGNC Symbol;Acc:HGNC:930]
ENSG00000027869	2.13006226676129	7.02143863186878e-05	SH2D2A	SH2 domain containing 2A [Source:HGNC Symbol;Acc:HGNC:10821]
ENSG00000028203	0.481722541253019	0.000894636339028329	VEZT	vezatin, adherens junctions transmembrane protein [Source:HGNC Symbol;Acc:HGNC:18258]
ENSG00000028310	-0.649906742349671	8.38724266413162e-32	BRD9	bromodomain containing 9 [Source:HGNC Symbol;Acc:HGNC:25818]
ENSG00000029534	1.80486570192512	1.56401443152693e-05	ANK1	ankyrin 1 [Source:HGNC Symbol;Acc:HGNC:492]
ENSG00000029725	-0.737771039506647	7.57150722175528e-10	RABEP1	rabaptin, RAB GTPase binding effector protein 1 [Source:HGNC Symbol;Acc:HGNC:17677]
ENSG00000029993	-1.28651058652634	2.88289260297786e-42	HMGB3	high mobility group box 3 [Source:HGNC Symbol;Acc:HGNC:5004]
ENSG00000030304	4.864355410641	1.37032291120923e-05	MUSK	muscle associated receptor tyrosine kinase [Source:HGNC Symbol;Acc:HGNC:7525]
ENSG00000031698	1.16411921048205	4.63509328325593e-08	SARS	seryl-tRNA synthetase [Source:HGNC Symbol;Acc:HGNC:10537]
ENSG00000031823	-0.377188152630033	0.000278925699879755	RANBP3	RAN binding protein 3 [Source:HGNC Symbol;Acc:HGNC:9850]
ENSG00000032219	-0.700945623201126	5.28751132009453e-11	ARID4A	AT-rich interaction domain 4A [Source:HGNC Symbol;Acc:HGNC:9885]
ENSG00000033100	-0.637457882120272	9.4595715663023e-05	CHPF2	chondroitin polymerizing factor 2 [Source:HGNC Symbol;Acc:HGNC:29270]
ENSG00000033122	3.20435934607005	1.46956480810455e-05	LRRC7	leucine rich repeat containing 7 [Source:HGNC Symbol;Acc:HGNC:18531]
ENSG00000033170	-0.483921275627413	4.57727742190188e-12	FUT8	fucosyltransferase 8 [Source:HGNC Symbol;Acc:HGNC:4019]
ENSG00000033178	-0.917288954259711	5.86968670406868e-16	UBA6	ubiquitin like modifier activating enzyme 6 [Source:HGNC Symbol;Acc:HGNC:25581]
ENSG00000033627	0.891072192923411	2.5890809280217e-11	ATP6V0A1	ATPase H+ transporting V0 subunit a1 [Source:HGNC Symbol;Acc:HGNC:865]
ENSG00000034152	0.408729123134054	0.000127962021993893	MAP2K3	mitogen-activated protein kinase kinase 3 [Source:HGNC Symbol;Acc:HGNC:6843]
ENSG00000034510	-0.732752318440191	1.5724168277111e-15	TMSB10	thymosin beta 10 [Source:HGNC Symbol;Acc:HGNC:11879]
ENSG00000034713	0.400199043897421	6.85063220874177e-10	GABARAPL2	GABA type A receptor associated protein like 2 [Source:HGNC Symbol;Acc:HGNC:13291]
ENSG00000035403	-0.757335860608723	3.18927595694722e-19	VCL	vinculin [Source:HGNC Symbol;Acc:HGNC:12665]
ENSG00000035499	-1.19720193645581	2.76013037079747e-17	DEPDC1B	DEP domain containing 1B [Source:HGNC Symbol;Acc:HGNC:24902]
ENSG00000036448	1.78546813827693	1.77256314287383e-09	MYOM2	myomesin 2 [Source:HGNC Symbol;Acc:HGNC:7614]
ENSG00000036828	1.36500941846222	3.24525668949134e-06	CASR	calcium sensing receptor [Source:HGNC Symbol;Acc:HGNC:1514]
ENSG00000038210	-0.908481696228326	9.43258938988619e-21	PI4K2B	phosphatidylinositol 4-kinase type 2 beta [Source:HGNC Symbol;Acc:HGNC:18215]
ENSG00000038382	-0.827244056944329	5.25068047217736e-18	TRIO	trio Rho guanine nucleotide exchange factor [Source:HGNC Symbol;Acc:HGNC:12303]
ENSG00000038427	-0.922335938552654	8.46921690543624e-26	VCAN	versican [Source:HGNC Symbol;Acc:HGNC:2464]
ENSG00000039139	-1.13470845965191	4.43883365862535e-23	DNAH5	dynein axonemal heavy chain 5 [Source:HGNC Symbol;Acc:HGNC:2950]
ENSG00000039523	-0.364289236320835	5.56501391863279e-06	RIPOR1	RHO family interacting cell polarization regulator 1 [Source:HGNC Symbol;Acc:HGNC:25836]
ENSG00000040275	-0.395495944441537	3.70517444191096e-05	SPDL1	spindle apparatus coiled-coil protein 1 [Source:HGNC Symbol;Acc:HGNC:26010]
ENSG00000040531	-0.369109792568014	0.000734536453002002	CTNS	cystinosin, lysosomal cystine transporter [Source:HGNC Symbol;Acc:HGNC:2518]
ENSG00000040608	-0.905093160909534	6.20156696003776e-07	RTN4R	reticulon 4 receptor [Source:HGNC Symbol;Acc:HGNC:18601]
ENSG00000040633	-0.286493413904841	0.000225434593777826	PHF23	PHD finger protein 23 [Source:HGNC Symbol;Acc:HGNC:28428]
ENSG00000041353	1.36883852326694	1.60582661611975e-09	RAB27B	RAB27B, member RAS oncogene family [Source:HGNC Symbol;Acc:HGNC:9767]
ENSG00000041982	1.50958256880112	6.02209030495451e-13	TNC	tenascin C [Source:HGNC Symbol;Acc:HGNC:5318]
ENSG00000042062	2.05853247487565	0.000211873069788613	RIPOR3	RIPOR family member 3 [Source:HGNC Symbol;Acc:HGNC:16168]
ENSG00000042088	-1.09309945607962	1.09569206921163e-33	TDP1	tyrosyl-DNA phosphodiesterase 1 [Source:HGNC Symbol;Acc:HGNC:18884]
ENSG00000042286	1.28526146056403	1.81946984137748e-45	AIFM2	apoptosis inducing factor mitochondria associated 2 [Source:HGNC Symbol;Acc:HGNC:21411]
ENSG00000042429	-0.316099152170512	8.64369410418754e-05	MED17	mediator complex subunit 17 [Source:HGNC Symbol;Acc:HGNC:2375]
ENSG00000042445	0.473837057978592	0.000644519645623749	RETSAT	retinol saturase [Source:HGNC Symbol;Acc:HGNC:25991]
ENSG00000042781	3.05905951381034	2.19945625082981e-19	USH2A	usherin [Source:HGNC Symbol;Acc:HGNC:12601]
ENSG00000042832	2.22428589145936	3.72393849863329e-05	TG	thyroglobulin [Source:HGNC Symbol;Acc:HGNC:11764]
ENSG00000043039	-2.92043049397845	2.27423275679973e-09	BARX2	BARX homeobox 2 [Source:HGNC Symbol;Acc:HGNC:956]
ENSG00000043143	-0.7420837747211	1.51044490814721e-07	JADE2	jade family PHD finger 2 [Source:HGNC Symbol;Acc:HGNC:22984]
ENSG00000043355	-0.556099651374927	2.97888105443509e-06	ZIC2	Zic family member 2 [Source:HGNC Symbol;Acc:HGNC:12873]
ENSG00000044115	-0.373655090072416	9.56315254133632e-10	CTNNA1	catenin alpha 1 [Source:HGNC Symbol;Acc:HGNC:2509]
ENSG00000044446	-0.782770819750403	2.87029862167293e-08	PHKA2	phosphorylase kinase regulatory subunit alpha 2 [Source:HGNC Symbol;Acc:HGNC:8926]
ENSG00000044574	1.00780180655283	8.08847937499506e-09	HSPA5	heat shock protein family A (Hsp70) member 5 [Source:HGNC Symbol;Acc:HGNC:5238]
ENSG00000046604	-0.853155320395687	1.81912253640866e-27	DSG2	desmoglein 2 [Source:HGNC Symbol;Acc:HGNC:3049]
ENSG00000046889	-2.56475042066037	2.45893104534493e-108	PREX2	phosphatidylinositol-3,4,5-trisphosphate dependent Rac exchange factor 2 [Source:HGNC Symbol;Acc:HGNC:22950]
ENSG00000047230	-0.917675810219292	4.38784255523193e-22	CTPS2	CTP synthase 2 [Source:HGNC Symbol;Acc:HGNC:2520]
ENSG00000047346	0.559175085443845	0.000114957312332074	FAM214A	family with sequence similarity 214 member A [Source:HGNC Symbol;Acc:HGNC:25609]
ENSG00000047365	0.632631966521458	1.5209728236349e-06	ARAP2	ArfGAP with RhoGAP domain, ankyrin repeat and PH domain 2 [Source:HGNC Symbol;Acc:HGNC:16924]
ENSG00000047457	-3.01414360520196	1.84801767165407e-82	CP	ceruloplasmin [Source:HGNC Symbol;Acc:HGNC:2295]
ENSG00000047578	0.466052763330692	0.000543936818866509	KIAA0556	KIAA0556 [Source:HGNC Symbol;Acc:HGNC:29068]
ENSG00000047579	-0.972083559745501	5.56209929427348e-14	DTNBP1	dystrobrevin binding protein 1 [Source:HGNC Symbol;Acc:HGNC:17328]
ENSG00000047597	2.77574582938316	5.95117372190806e-19	XK	X-linked Kx blood group [Source:HGNC Symbol;Acc:HGNC:12811]
ENSG00000047617	1.76936626336603	0.000348724753792154	ANO2	anoctamin 2 [Source:HGNC Symbol;Acc:HGNC:1183]
ENSG00000047634	-0.4232127810971	3.26725577921844e-06	SCML1	Scm polycomb group protein like 1 [Source:HGNC Symbol;Acc:HGNC:10580]
ENSG00000047936	3.50794555428762	3.14459475205107e-05	ROS1	ROS proto-oncogene 1, receptor tyrosine kinase [Source:HGNC Symbol;Acc:HGNC:10261]
ENSG00000048052	1.03899348048978	1.6732954667368e-15	HDAC9	histone deacetylase 9 [Source:HGNC Symbol;Acc:HGNC:14065]
ENSG00000048140	-0.455886651812043	3.43126445115962e-06	TSPAN17	tetraspanin 17 [Source:HGNC Symbol;Acc:HGNC:13594]
ENSG00000048392	1.29182955636346	8.95300535837988e-26	RRM2B	ribonucleotide reductase regulatory TP53 inducible subunit M2B [Source:HGNC Symbol;Acc:HGNC:17296]
ENSG00000049089	2.43301260620787	1.66394636515427e-18	COL9A2	collagen type IX alpha 2 chain [Source:HGNC Symbol;Acc:HGNC:2218]
ENSG00000049239	-0.479753335999553	2.94057332649692e-08	H6PD	hexose-6-phosphate dehydrogenase/glucose 1-dehydrogenase [Source:HGNC Symbol;Acc:HGNC:4795]
ENSG00000049245	-0.335048599000713	1.26324933433684e-07	VAMP3	vesicle associated membrane protein 3 [Source:HGNC Symbol;Acc:HGNC:12644]
ENSG00000049246	-0.990319282137738	3.05343033407758e-08	PER3	period circadian regulator 3 [Source:HGNC Symbol;Acc:HGNC:8847]
ENSG00000049249	1.99712274163732	1.32544984213486e-25	TNFRSF9	TNF receptor superfamily member 9 [Source:HGNC Symbol;Acc:HGNC:11924]
ENSG00000049541	-0.758899593691533	1.11636192651927e-14	RFC2	replication factor C subunit 2 [Source:HGNC Symbol;Acc:HGNC:9970]
ENSG00000049618	-0.56255601182383	5.38524091055789e-06	ARID1B	AT-rich interaction domain 1B [Source:HGNC Symbol;Acc:HGNC:18040]
ENSG00000049860	-0.279712556659498	6.37819820114514e-05	HEXB	hexosaminidase subunit beta [Source:HGNC Symbol;Acc:HGNC:4879]
ENSG00000050165	-0.547083888541236	1.73835108041526e-08	DKK3	dickkopf WNT signaling pathway inhibitor 3 [Source:HGNC Symbol;Acc:HGNC:2893]
ENSG00000050393	-0.470669021553419	0.000164528273887322	MCUR1	mitochondrial calcium uniporter regulator 1 [Source:HGNC Symbol;Acc:HGNC:21097]
ENSG00000050405	1.10697229417606	5.14672139276447e-18	LIMA1	LIM domain and actin binding 1 [Source:HGNC Symbol;Acc:HGNC:24636]
ENSG00000050426	0.808339713850477	3.50413044453478e-09	LETMD1	LETM1 domain containing 1 [Source:HGNC Symbol;Acc:HGNC:24241]
ENSG00000050438	-2.07260132024394	1.5571571518586e-13	SLC4A8	solute carrier family 4 member 8 [Source:HGNC Symbol;Acc:HGNC:11034]
ENSG00000050555	3.165306833399	0.000162754040928584	LAMC3	laminin subunit gamma 3 [Source:HGNC Symbol;Acc:HGNC:6494]
ENSG00000050628	4.32538673501165	0.000252416571287538	PTGER3	prostaglandin E receptor 3 [Source:HGNC Symbol;Acc:HGNC:9595]
ENSG00000050748	-0.429624810588849	5.78555150078372e-06	MAPK9	mitogen-activated protein kinase 9 [Source:HGNC Symbol;Acc:HGNC:6886]
ENSG00000050820	-0.468619820673182	8.74589456039693e-06	BCAR1	BCAR1 scaffold protein, Cas family member [Source:HGNC Symbol;Acc:HGNC:971]
ENSG00000051108	0.990172327425886	1.45714059012892e-35	HERPUD1	homocysteine inducible ER protein with ubiquitin like domain 1 [Source:HGNC Symbol;Acc:HGNC:13744]
ENSG00000051180	-1.23628234522772	1.95854417602365e-20	RAD51	RAD51 recombinase [Source:HGNC Symbol;Acc:HGNC:9817]
ENSG00000051341	-0.604172501321352	1.09628961676107e-05	POLQ	DNA polymerase theta [Source:HGNC Symbol;Acc:HGNC:9186]
ENSG00000051596	-0.333449246001341	0.000999538417786757	THOC3	THO complex 3 [Source:HGNC Symbol;Acc:HGNC:19072]
ENSG00000051620	-0.672286322683758	0.000367233163314747	HEBP2	heme binding protein 2 [Source:HGNC Symbol;Acc:HGNC:15716]
ENSG00000051825	-0.693603616532071	3.68074466503546e-07	MPHOSPH9	M-phase phosphoprotein 9 [Source:HGNC Symbol;Acc:HGNC:7215]
ENSG00000053254	-0.693681858486432	1.19813990723908e-20	FOXN3	forkhead box N3 [Source:HGNC Symbol;Acc:HGNC:1928]
ENSG00000053371	-0.845298228882692	1.05506755765594e-07	AKR7A2	aldo-keto reductase family 7 member A2 [Source:HGNC Symbol;Acc:HGNC:389]
ENSG00000053372	-0.432099073648277	1.23431390521548e-08	MRTO4	MRT4 homolog, ribosome maturation factor [Source:HGNC Symbol;Acc:HGNC:18477]
ENSG00000053524	1.37882523897716	7.94230248396292e-07	MCF2L2	MCF.2 cell line derived transforming sequence-like 2 [Source:HGNC Symbol;Acc:HGNC:30319]
ENSG00000053747	-0.736459087788249	3.95845410960905e-06	LAMA3	laminin subunit alpha 3 [Source:HGNC Symbol;Acc:HGNC:6483]
ENSG00000054118	-0.532880397595525	6.11553657358905e-07	THRAP3	thyroid hormone receptor associated protein 3 [Source:HGNC Symbol;Acc:HGNC:22964]
ENSG00000054148	-0.606737668507617	8.12899187848251e-07	PHPT1	phosphohistidine phosphatase 1 [Source:HGNC Symbol;Acc:HGNC:30033]
ENSG00000054277	-2.732885442398	1.79543621712404e-18	OPN3	opsin 3 [Source:HGNC Symbol;Acc:HGNC:14007]
ENSG00000054282	0.91435370677191	0.000862432645892324	SDCCAG8	serologically defined colon cancer antigen 8 [Source:HGNC Symbol;Acc:HGNC:10671]
ENSG00000054392	0.74802105559912	0.00032148340912386	HHAT	hedgehog acyltransferase [Source:HGNC Symbol;Acc:HGNC:18270]
ENSG00000054523	-0.444382703050284	5.08662663245133e-06	KIF1B	kinesin family member 1B [Source:HGNC Symbol;Acc:HGNC:16636]
ENSG00000054611	-0.29902826234731	0.000757044210502375	TBC1D22A	TBC1 domain family member 22A [Source:HGNC Symbol;Acc:HGNC:1309]
ENSG00000054654	-1.30169601684907	1.3865250735876e-23	SYNE2	spectrin repeat containing nuclear envelope protein 2 [Source:HGNC Symbol;Acc:HGNC:17084]
ENSG00000054793	-0.617340701793876	1.64007241904767e-07	ATP9A	ATPase phospholipid transporting 9A (putative) [Source:HGNC Symbol;Acc:HGNC:13540]
ENSG00000054965	-1.01327688782498	1.87862840665482e-13	FAM168A	family with sequence similarity 168 member A [Source:HGNC Symbol;Acc:HGNC:28999]
ENSG00000054967	-0.693073394210948	5.2484307585303e-16	RELT	RELT TNF receptor [Source:HGNC Symbol;Acc:HGNC:13764]
ENSG00000055070	-0.464510321977018	1.29878730606502e-14	SZRD1	SUZ RNA binding domain containing 1 [Source:HGNC Symbol;Acc:HGNC:30232]
ENSG00000055130	-0.569501999881696	5.26533081818169e-14	CUL1	cullin 1 [Source:HGNC Symbol;Acc:HGNC:2551]
ENSG00000055211	-0.571277743394033	2.16928233947721e-15	GINM1	glycoprotein integral membrane 1 [Source:HGNC Symbol;Acc:HGNC:21074]
ENSG00000055332	0.557790892727673	0.000123784413196042	EIF2AK2	eukaryotic translation initiation factor 2 alpha kinase 2 [Source:HGNC Symbol;Acc:HGNC:9437]
ENSG00000055483	0.766748963096281	0.000103463208124121	USP36	ubiquitin specific peptidase 36 [Source:HGNC Symbol;Acc:HGNC:20062]
ENSG00000055609	-0.714822997655036	6.81320796663748e-08	KMT2C	lysine methyltransferase 2C [Source:HGNC Symbol;Acc:HGNC:13726]
ENSG00000055732	0.848400621956677	1.47842081073469e-08	MCOLN3	mucolipin 3 [Source:HGNC Symbol;Acc:HGNC:13358]
ENSG00000055950	-0.507370555976073	8.14049339512194e-06	MRPL43	mitochondrial ribosomal protein L43 [Source:HGNC Symbol;Acc:HGNC:14517]
ENSG00000056291	4.83902525948118	0.00033375864991242	NPFFR2	neuropeptide FF receptor 2 [Source:HGNC Symbol;Acc:HGNC:4525]
ENSG00000056558	3.40427011556851	3.12771067461248e-279	TRAF1	TNF receptor associated factor 1 [Source:HGNC Symbol;Acc:HGNC:12031]
ENSG00000057019	-0.416536949124345	7.16166092322064e-05	DCBLD2	discoidin, CUB and LCCL domain containing 2 [Source:HGNC Symbol;Acc:HGNC:24627]
ENSG00000057608	-0.3966906121088	2.4228670251624e-06	GDI2	GDP dissociation inhibitor 2 [Source:HGNC Symbol;Acc:HGNC:4227]
ENSG00000057704	1.57780515148924	5.00461980571009e-27	TMCC3	transmembrane and coiled-coil domain family 3 [Source:HGNC Symbol;Acc:HGNC:29199]
ENSG00000058056	-0.821634342404687	1.21029102817029e-15	USP13	ubiquitin specific peptidase 13 [Source:HGNC Symbol;Acc:HGNC:12611]
ENSG00000058085	0.95648883859532	1.83004216104852e-10	LAMC2	laminin subunit gamma 2 [Source:HGNC Symbol;Acc:HGNC:6493]
ENSG00000058091	-0.862972123437915	8.00159168786461e-12	CDK14	cyclin dependent kinase 14 [Source:HGNC Symbol;Acc:HGNC:8883]
ENSG00000058335	1.84673108282786	5.98014736355118e-11	RASGRF1	Ras protein specific guanine nucleotide releasing factor 1 [Source:HGNC Symbol;Acc:HGNC:9875]
ENSG00000058453	-1.04611524303388	8.85943197439854e-14	CROCC	ciliary rootlet coiled-coil, rootletin [Source:HGNC Symbol;Acc:HGNC:21299]
ENSG00000058799	0.47335024265956	0.000594795116050341	YIPF1	Yip1 domain family member 1 [Source:HGNC Symbol;Acc:HGNC:25231]
ENSG00000058804	-0.847822141675873	9.84014637812452e-36	NDC1	NDC1 transmembrane nucleoporin [Source:HGNC Symbol;Acc:HGNC:25525]
ENSG00000059122	0.653341582645651	7.43347432864603e-12	FLYWCH1	FLYWCH-type zinc finger 1 [Source:HGNC Symbol;Acc:HGNC:25404]
ENSG00000059377	-0.531881586070743	0.000235707911897914	TBXAS1	thromboxane A synthase 1 [Source:HGNC Symbol;Acc:HGNC:11609]
ENSG00000059378	0.365164496326343	2.52753571659373e-05	PARP12	poly(ADP-ribose) polymerase family member 12 [Source:HGNC Symbol;Acc:HGNC:21919]
ENSG00000059573	-0.428674614083279	1.48046297654216e-05	ALDH18A1	aldehyde dehydrogenase 18 family member A1 [Source:HGNC Symbol;Acc:HGNC:9722]
ENSG00000059728	2.21996202670823	1.67443900569044e-11	MXD1	MAX dimerization protein 1 [Source:HGNC Symbol;Acc:HGNC:6761]
ENSG00000059758	0.84639185035082	0.00018191639555685	CDK17	cyclin dependent kinase 17 [Source:HGNC Symbol;Acc:HGNC:8750]
ENSG00000060069	-0.522102566383876	1.02165703707149e-09	CTDP1	CTD phosphatase subunit 1 [Source:HGNC Symbol;Acc:HGNC:2498]
ENSG00000060491	-0.521836923004765	9.59649644063625e-05	OGFR	opioid growth factor receptor [Source:HGNC Symbol;Acc:HGNC:15768]
ENSG00000060642	0.667798718906349	1.00060245762088e-10	PIGV	phosphatidylinositol glycan anchor biosynthesis class V [Source:HGNC Symbol;Acc:HGNC:26031]
ENSG00000060656	-1.90956414031896	7.78513793348572e-11	PTPRU	protein tyrosine phosphatase receptor type U [Source:HGNC Symbol;Acc:HGNC:9683]
ENSG00000060749	-0.71160814598693	1.36674546327976e-10	QSER1	glutamine and serine rich 1 [Source:HGNC Symbol;Acc:HGNC:26154]
ENSG00000060971	-0.452465386560176	8.4237617456357e-07	ACAA1	acetyl-CoA acyltransferase 1 [Source:HGNC Symbol;Acc:HGNC:82]
ENSG00000060982	1.2228737952482	2.6833985222581e-07	BCAT1	branched chain amino acid transaminase 1 [Source:HGNC Symbol;Acc:HGNC:976]
ENSG00000061337	-1.51594587543639	1.43754374643927e-05	LZTS1	leucine zipper tumor suppressor 1 [Source:HGNC Symbol;Acc:HGNC:13861]
ENSG00000061656	-1.11895303598938	2.61889860496977e-13	SPAG4	sperm associated antigen 4 [Source:HGNC Symbol;Acc:HGNC:11214]
ENSG00000061918	-1.15547664210204	1.16343708154643e-05	GUCY1B1	guanylate cyclase 1 soluble subunit beta 1 [Source:HGNC Symbol;Acc:HGNC:4687]
ENSG00000061936	-0.405941135865236	2.86588876576084e-05	SFSWAP	splicing factor SWAP [Source:HGNC Symbol;Acc:HGNC:10790]
ENSG00000061938	-0.990773122765688	7.41560337458614e-34	TNK2	tyrosine kinase non receptor 2 [Source:HGNC Symbol;Acc:HGNC:19297]
ENSG00000062038	1.785537573247	0.0001362218361485	CDH3	cadherin 3 [Source:HGNC Symbol;Acc:HGNC:1762]
ENSG00000062282	1.94222035130825	4.93596243166457e-07	DGAT2	diacylglycerol O-acyltransferase 2 [Source:HGNC Symbol;Acc:HGNC:16940]
ENSG00000062485	-0.292107202995896	2.95616716159557e-05	CS	citrate synthase [Source:HGNC Symbol;Acc:HGNC:2422]
ENSG00000062822	-1.21940724152045	1.18331972092452e-16	POLD1	DNA polymerase delta 1, catalytic subunit [Source:HGNC Symbol;Acc:HGNC:9175]
ENSG00000063015	3.70859187251744	0.000135034124472753	SEZ6	seizure related 6 homolog [Source:HGNC Symbol;Acc:HGNC:15955]
ENSG00000063245	-0.609621313810992	7.12920148242746e-05	EPN1	epsin 1 [Source:HGNC Symbol;Acc:HGNC:21604]
ENSG00000063587	-0.320715989195964	4.59535624726743e-07	ZNF275	zinc finger protein 275 [Source:HGNC Symbol;Acc:HGNC:13069]
ENSG00000063660	-1.25134721496471	2.73376166227627e-09	GPC1	glypican 1 [Source:HGNC Symbol;Acc:HGNC:4449]
ENSG00000063978	-0.382108025324151	3.54786877449916e-05	RNF4	ring finger protein 4 [Source:HGNC Symbol;Acc:HGNC:10067]
ENSG00000064012	0.601000821291778	8.83290163321171e-08	CASP8	caspase 8 [Source:HGNC Symbol;Acc:HGNC:1509]
ENSG00000064042	0.673638083471408	6.64737057551009e-07	LIMCH1	LIM and calponin homology domains 1 [Source:HGNC Symbol;Acc:HGNC:29191]
ENSG00000064270	3.00952653587051	6.03422549481614e-05	ATP2C2	ATPase secretory pathway Ca2+ transporting 2 [Source:HGNC Symbol;Acc:HGNC:29103]
ENSG00000064300	1.86726255433772	5.28043455175576e-05	NGFR	nerve growth factor receptor [Source:HGNC Symbol;Acc:HGNC:7809]
ENSG00000064309	-1.89185319575653	5.12081621435039e-09	CDON	cell adhesion associated, oncogene regulated [Source:HGNC Symbol;Acc:HGNC:17104]
ENSG00000064393	-0.883401441966668	1.68353296105406e-14	HIPK2	homeodomain interacting protein kinase 2 [Source:HGNC Symbol;Acc:HGNC:14402]
ENSG00000064489	0.573187438747694	0.000976214759064547	BORCS8-MEF2B	BORCS8-MEF2B readthrough [Source:HGNC Symbol;Acc:HGNC:39979]
ENSG00000064490	0.320216690165422	0.000739446212276487	RFXANK	regulatory factor X associated ankyrin containing protein [Source:HGNC Symbol;Acc:HGNC:9987]
ENSG00000064547	0.654613207513074	1.552112656643e-05	LPAR2	lysophosphatidic acid receptor 2 [Source:HGNC Symbol;Acc:HGNC:3168]
ENSG00000064652	0.931711084521711	0.000164712110269002	SNX24	sorting nexin 24 [Source:HGNC Symbol;Acc:HGNC:21533]
ENSG00000064655	4.23528782473706	0.000589653042988184	EYA2	EYA transcriptional coactivator and phosphatase 2 [Source:HGNC Symbol;Acc:HGNC:3520]
ENSG00000064666	-0.575142750739281	4.49169570254477e-24	CNN2	calponin 2 [Source:HGNC Symbol;Acc:HGNC:2156]
ENSG00000064886	2.5683797519155	3.02361968747046e-06	CHI3L2	chitinase 3 like 2 [Source:HGNC Symbol;Acc:HGNC:1933]
ENSG00000064961	-0.819733730599099	1.61203559716991e-06	HMG20B	high mobility group 20B [Source:HGNC Symbol;Acc:HGNC:5002]
ENSG00000064989	2.6017825428941	0.000248161885923634	CALCRL	calcitonin receptor like receptor [Source:HGNC Symbol;Acc:HGNC:16709]
ENSG00000064999	-0.38429392579636	0.000869529687446588	ANKS1A	ankyrin repeat and sterile alpha motif domain containing 1A [Source:HGNC Symbol;Acc:HGNC:20961]
ENSG00000065135	-0.498162379885771	3.85327950205842e-10	GNAI3	G protein subunit alpha i3 [Source:HGNC Symbol;Acc:HGNC:4387]
ENSG00000065154	-0.538103189213195	8.70415730521565e-07	OAT	ornithine aminotransferase [Source:HGNC Symbol;Acc:HGNC:8091]
ENSG00000065308	-1.38867254389552	5.17768836169742e-65	TRAM2	translocation associated membrane protein 2 [Source:HGNC Symbol;Acc:HGNC:16855]
ENSG00000065325	1.97065340448985	0.000345480096933188	GLP2R	glucagon like peptide 2 receptor [Source:HGNC Symbol;Acc:HGNC:4325]
ENSG00000065328	-1.05653936738997	5.10645205492024e-25	MCM10	minichromosome maintenance 10 replication initiation factor [Source:HGNC Symbol;Acc:HGNC:18043]
ENSG00000065457	0.552509058243588	0.000812623945225825	ADAT1	adenosine deaminase tRNA specific 1 [Source:HGNC Symbol;Acc:HGNC:228]
ENSG00000065485	-1.14540984082127	2.77318974004129e-13	PDIA5	protein disulfide isomerase family A member 5 [Source:HGNC Symbol;Acc:HGNC:24811]
ENSG00000065526	-0.402468487373603	0.000112072565505999	SPEN	spen family transcriptional repressor [Source:HGNC Symbol;Acc:HGNC:17575]
ENSG00000065559	-0.50066128886427	1.52207179031988e-06	MAP2K4	mitogen-activated protein kinase kinase 4 [Source:HGNC Symbol;Acc:HGNC:6844]
ENSG00000065609	5.29242699501826	2.35252081406912e-10	SNAP91	synaptosome associated protein 91 [Source:HGNC Symbol;Acc:HGNC:14986]
ENSG00000065613	-0.627405594982	0.000427817893052428	SLK	STE20 like kinase [Source:HGNC Symbol;Acc:HGNC:11088]
ENSG00000065621	1.30646187516191	9.10712966253152e-05	GSTO2	glutathione S-transferase omega 2 [Source:HGNC Symbol;Acc:HGNC:23064]
ENSG00000065802	1.14277716816955	3.31115273014174e-08	ASB1	ankyrin repeat and SOCS box containing 1 [Source:HGNC Symbol;Acc:HGNC:16011]
ENSG00000065833	0.554823737060711	1.07193574727772e-12	ME1	malic enzyme 1 [Source:HGNC Symbol;Acc:HGNC:6983]
ENSG00000065882	-0.610968423664106	1.11444693503311e-17	TBC1D1	TBC1 domain family member 1 [Source:HGNC Symbol;Acc:HGNC:11578]
ENSG00000065970	-0.662721554187026	2.44951395434752e-12	FOXJ2	forkhead box J2 [Source:HGNC Symbol;Acc:HGNC:24818]
ENSG00000065978	-0.626690215626293	1.41107259589665e-29	YBX1	Y-box binding protein 1 [Source:HGNC Symbol;Acc:HGNC:8014]
ENSG00000066027	0.441140585515559	9.47663890211917e-05	PPP2R5A	protein phosphatase 2 regulatory subunit B'alpha [Source:HGNC Symbol;Acc:HGNC:9309]
ENSG00000066044	-0.499250902974369	5.15332094838997e-16	ELAVL1	ELAV like RNA binding protein 1 [Source:HGNC Symbol;Acc:HGNC:3312]
ENSG00000066135	0.557463049625744	0.000415928771604147	KDM4A	lysine demethylase 4A [Source:HGNC Symbol;Acc:HGNC:22978]
ENSG00000066230	-0.73879411169514	1.26670983383196e-05	SLC9A3	solute carrier family 9 member A3 [Source:HGNC Symbol;Acc:HGNC:11073]
ENSG00000066248	1.83603134827634	9.88965133808419e-77	NGEF	neuronal guanine nucleotide exchange factor [Source:HGNC Symbol;Acc:HGNC:7807]
ENSG00000066279	-1.18271034737388	4.07110209553198e-50	ASPM	abnormal spindle microtubule assembly [Source:HGNC Symbol;Acc:HGNC:19048]
ENSG00000066322	-0.308677581566289	5.28180169111668e-07	ELOVL1	ELOVL fatty acid elongase 1 [Source:HGNC Symbol;Acc:HGNC:14418]
ENSG00000066382	2.99901524888456	0.000382716647592559	MPPED2	metallophosphoesterase domain containing 2 [Source:HGNC Symbol;Acc:HGNC:1180]
ENSG00000066405	2.72278970808093	2.00811968646342e-05	CLDN18	claudin 18 [Source:HGNC Symbol;Acc:HGNC:2039]
ENSG00000066427	-0.451356545133223	6.41314561143746e-05	ATXN3	ataxin 3 [Source:HGNC Symbol;Acc:HGNC:7106]
ENSG00000066468	-1.68660363016049	1.70877985872849e-06	FGFR2	fibroblast growth factor receptor 2 [Source:HGNC Symbol;Acc:HGNC:3689]
ENSG00000066557	-0.366838546642117	7.7384717666678e-06	LRRC40	leucine rich repeat containing 40 [Source:HGNC Symbol;Acc:HGNC:26004]
ENSG00000066583	-0.36274930940867	4.66254532849071e-06	ISOC1	isochorismatase domain containing 1 [Source:HGNC Symbol;Acc:HGNC:24254]
ENSG00000066697	-0.53225723936942	2.39153449917666e-10	MSANTD3	Myb/SANT DNA binding domain containing 3 [Source:HGNC Symbol;Acc:HGNC:23370]
ENSG00000066933	-0.363633245178888	0.000732318404448116	MYO9A	myosin IXA [Source:HGNC Symbol;Acc:HGNC:7608]
ENSG00000067057	-1.39792953052949	4.82271142394235e-70	PFKP	phosphofructokinase, platelet [Source:HGNC Symbol;Acc:HGNC:8878]
ENSG00000067066	0.632109494949366	1.71876371053608e-09	SP100	SP100 nuclear antigen [Source:HGNC Symbol;Acc:HGNC:11206]
ENSG00000067082	-1.00383409595512	1.08633075894403e-44	KLF6	Kruppel like factor 6 [Source:HGNC Symbol;Acc:HGNC:2235]
ENSG00000067191	-0.567173453079549	1.81495632971591e-06	CACNB1	calcium voltage-gated channel auxiliary subunit beta 1 [Source:HGNC Symbol;Acc:HGNC:1401]
ENSG00000067560	-0.565229767439333	6.81025476996264e-21	RHOA	ras homolog family member A [Source:HGNC Symbol;Acc:HGNC:667]
ENSG00000067715	1.82565017437037	3.63728841738718e-20	SYT1	synaptotagmin 1 [Source:HGNC Symbol;Acc:HGNC:11509]
ENSG00000067798	1.26366271577618	6.23374693509136e-06	NAV3	neuron navigator 3 [Source:HGNC Symbol;Acc:HGNC:15998]
ENSG00000067829	-0.326991952019372	0.00060054662657405	IDH3G	isocitrate dehydrogenase (NAD(+)) 3 gamma [Source:HGNC Symbol;Acc:HGNC:5386]
ENSG00000067836	-1.0814816688257	2.91761761510556e-05	ROGDI	rogdi atypical leucine zipper [Source:HGNC Symbol;Acc:HGNC:29478]
ENSG00000067840	3.19480077693124	0.000565033890739807	PDZD4	PDZ domain containing 4 [Source:HGNC Symbol;Acc:HGNC:21167]
ENSG00000067992	-0.827472191119591	2.00162521618104e-10	PDK3	pyruvate dehydrogenase kinase 3 [Source:HGNC Symbol;Acc:HGNC:8811]
ENSG00000068001	-0.654561082272888	3.14688311463009e-12	HYAL2	hyaluronidase 2 [Source:HGNC Symbol;Acc:HGNC:5321]
ENSG00000068078	-1.68758995755348	2.74567931072718e-16	FGFR3	fibroblast growth factor receptor 3 [Source:HGNC Symbol;Acc:HGNC:3690]
ENSG00000068079	1.49629298661791	4.55202636046045e-45	IFI35	interferon induced protein 35 [Source:HGNC Symbol;Acc:HGNC:5399]
ENSG00000068354	-0.647978388744585	4.38735499310202e-07	TBC1D25	TBC1 domain family member 25 [Source:HGNC Symbol;Acc:HGNC:8092]
ENSG00000068394	-0.435642409257033	3.32093598781568e-06	GPKOW	G-patch domain and KOW motifs [Source:HGNC Symbol;Acc:HGNC:30677]
ENSG00000068438	-0.285089139167721	2.30426278846715e-06	FTSJ1	FtsJ RNA 2'-O-methyltransferase 1 [Source:HGNC Symbol;Acc:HGNC:13254]
ENSG00000068489	-1.20336569558529	9.96452525178555e-34	PRR11	proline rich 11 [Source:HGNC Symbol;Acc:HGNC:25619]
ENSG00000068650	-0.615510617659575	8.96078979351845e-08	ATP11A	ATPase phospholipid transporting 11A [Source:HGNC Symbol;Acc:HGNC:13552]
ENSG00000068885	-0.419057875740544	5.89086678120959e-06	IFT80	intraflagellar transport 80 [Source:HGNC Symbol;Acc:HGNC:29262]
ENSG00000068912	0.238523311173669	0.0008993593190253	ERLEC1	endoplasmic reticulum lectin 1 [Source:HGNC Symbol;Acc:HGNC:25222]
ENSG00000068971	0.748119815226754	5.50704958454405e-05	PPP2R5B	protein phosphatase 2 regulatory subunit B'beta [Source:HGNC Symbol;Acc:HGNC:9310]
ENSG00000069011	-0.775607160125014	3.34124228392699e-10	PITX1	paired like homeodomain 1 [Source:HGNC Symbol;Acc:HGNC:9004]
ENSG00000069020	1.1970606570131	2.71554536061414e-07	MAST4	microtubule associated serine/threonine kinase family member 4 [Source:HGNC Symbol;Acc:HGNC:19037]
ENSG00000069122	3.88529672197873	0.000264270776836179	ADGRF5	adhesion G protein-coupled receptor F5 [Source:HGNC Symbol;Acc:HGNC:19030]
ENSG00000069188	3.12216476334976	7.3738760034902e-18	SDK2	sidekick cell adhesion molecule 2 [Source:HGNC Symbol;Acc:HGNC:19308]
ENSG00000069275	-0.697366492978962	7.19218878056526e-13	NUCKS1	nuclear casein kinase and cyclin dependent kinase substrate 1 [Source:HGNC Symbol;Acc:HGNC:29923]
ENSG00000069399	-0.58182875719533	0.000325671647011991	BCL3	BCL3 transcription coactivator [Source:HGNC Symbol;Acc:HGNC:998]
ENSG00000069431	2.96863018411791	7.77339937961865e-09	ABCC9	ATP binding cassette subfamily C member 9 [Source:HGNC Symbol;Acc:HGNC:60]
ENSG00000069493	0.670733882203773	3.33215515639547e-06	CLEC2D	C-type lectin domain family 2 member D [Source:HGNC Symbol;Acc:HGNC:14351]
ENSG00000069667	2.96693262819983	2.78220050711672e-05	RORA	RAR related orphan receptor A [Source:HGNC Symbol;Acc:HGNC:10258]
ENSG00000069812	1.20927730058586	1.04478265246279e-05	HES2	hes family bHLH transcription factor 2 [Source:HGNC Symbol;Acc:HGNC:16005]
ENSG00000069974	-0.601329019579305	1.56430341293071e-08	RAB27A	RAB27A, member RAS oncogene family [Source:HGNC Symbol;Acc:HGNC:9766]
ENSG00000070047	-0.955107530945541	2.78937497578656e-22	PHRF1	PHD and ring finger domains 1 [Source:HGNC Symbol;Acc:HGNC:24351]
ENSG00000070061	-0.508367194185045	0.000550698513952456	ELP1	elongator complex protein 1 [Source:HGNC Symbol;Acc:HGNC:5959]
ENSG00000070159	-0.514842051639739	0.000781294223716088	PTPN3	protein tyrosine phosphatase non-receptor type 3 [Source:HGNC Symbol;Acc:HGNC:9655]
ENSG00000070182	1.15056937108611	2.14498929416907e-05	SPTB	spectrin beta, erythrocytic [Source:HGNC Symbol;Acc:HGNC:11274]
ENSG00000070214	-0.653863910329468	5.10537548115543e-14	SLC44A1	solute carrier family 44 member 1 [Source:HGNC Symbol;Acc:HGNC:18798]
ENSG00000070366	-1.02972797069828	5.00434220342945e-29	SMG6	SMG6 nonsense mediated mRNA decay factor [Source:HGNC Symbol;Acc:HGNC:17809]
ENSG00000070367	-0.549490566802336	1.20269589048804e-08	EXOC5	exocyst complex component 5 [Source:HGNC Symbol;Acc:HGNC:10696]
ENSG00000070371	1.62511314139668	4.94344396283905e-10	CLTCL1	clathrin heavy chain like 1 [Source:HGNC Symbol;Acc:HGNC:2093]
ENSG00000070413	-0.645949893093387	5.49363531085258e-08	DGCR2	DiGeorge syndrome critical region gene 2 [Source:HGNC Symbol;Acc:HGNC:2845]
ENSG00000070540	1.04042139242087	1.302133879488e-31	WIPI1	WD repeat domain, phosphoinositide interacting 1 [Source:HGNC Symbol;Acc:HGNC:25471]
ENSG00000070614	-0.414611258243278	4.50787354034429e-09	NDST1	N-deacetylase and N-sulfotransferase 1 [Source:HGNC Symbol;Acc:HGNC:7680]
ENSG00000070669	2.11258947921783	1.32559383317214e-05	ASNS	asparagine synthetase (glutamine-hydrolyzing) [Source:HGNC Symbol;Acc:HGNC:753]
ENSG00000070729	2.76075147341107	2.96250356356295e-05	CNGB1	cyclic nucleotide gated channel subunit beta 1 [Source:HGNC Symbol;Acc:HGNC:2151]
ENSG00000070814	-0.568740961889025	1.30591443540985e-09	TCOF1	treacle ribosome biogenesis factor 1 [Source:HGNC Symbol;Acc:HGNC:11654]
ENSG00000070831	-0.399062312278067	1.99301047559682e-07	CDC42	cell division cycle 42 [Source:HGNC Symbol;Acc:HGNC:1736]
ENSG00000070915	3.10937504228268	3.3140193627642e-13	SLC12A3	solute carrier family 12 member 3 [Source:HGNC Symbol;Acc:HGNC:10912]
ENSG00000071051	-0.595690823042628	1.02246820764697e-13	NCK2	NCK adaptor protein 2 [Source:HGNC Symbol;Acc:HGNC:7665]
ENSG00000071127	-0.607262149870567	2.81246793721153e-10	WDR1	WD repeat domain 1 [Source:HGNC Symbol;Acc:HGNC:12754]
ENSG00000071189	-0.434662371980636	2.32903461610915e-07	SNX13	sorting nexin 13 [Source:HGNC Symbol;Acc:HGNC:21335]
ENSG00000071205	-0.630266448523818	1.79720741988575e-17	ARHGAP10	Rho GTPase activating protein 10 [Source:HGNC Symbol;Acc:HGNC:26099]
ENSG00000071242	-1.15588630135931	6.05036163625833e-08	RPS6KA2	ribosomal protein S6 kinase A2 [Source:HGNC Symbol;Acc:HGNC:10431]
ENSG00000071282	-1.51967721289223	2.94513228884203e-11	LMCD1	LIM and cysteine rich domains 1 [Source:HGNC Symbol;Acc:HGNC:6633]
ENSG00000071537	-0.563435201712214	6.087978345266e-11	SEL1L	SEL1L adaptor subunit of ERAD E3 ubiquitin ligase [Source:HGNC Symbol;Acc:HGNC:10717]
ENSG00000071539	-0.695633539946649	1.22531559845997e-13	TRIP13	thyroid hormone receptor interactor 13 [Source:HGNC Symbol;Acc:HGNC:12307]
ENSG00000071553	-0.37236161701313	2.73953466365325e-05	ATP6AP1	ATPase H+ transporting accessory protein 1 [Source:HGNC Symbol;Acc:HGNC:868]
ENSG00000071564	-0.790102232513435	1.63124685365322e-14	TCF3	transcription factor 3 [Source:HGNC Symbol;Acc:HGNC:11633]
ENSG00000071626	-0.39193576609249	0.000767663340800021	DAZAP1	DAZ associated protein 1 [Source:HGNC Symbol;Acc:HGNC:2683]
ENSG00000071794	-0.640811635199232	5.48805657839154e-10	HLTF	helicase like transcription factor [Source:HGNC Symbol;Acc:HGNC:11099]
ENSG00000071859	-0.287611122305817	0.000225254263754431	FAM50A	family with sequence similarity 50 member A [Source:HGNC Symbol;Acc:HGNC:18786]
ENSG00000071889	-0.423495460307077	0.000210418431029217	FAM3A	family with sequence similarity 3 member A [Source:HGNC Symbol;Acc:HGNC:13749]
ENSG00000071894	-0.933206154297002	1.7188586945301e-36	CPSF1	cleavage and polyadenylation specific factor 1 [Source:HGNC Symbol;Acc:HGNC:2324]
ENSG00000071909	2.13077527229969	1.00326662908903e-05	MYO3B	myosin IIIB [Source:HGNC Symbol;Acc:HGNC:15576]
ENSG00000072042	0.380971841592444	0.000120774455184492	RDH11	retinol dehydrogenase 11 [Source:HGNC Symbol;Acc:HGNC:17964]
ENSG00000072071	1.37622941861105	4.58664354715463e-27	ADGRL1	adhesion G protein-coupled receptor L1 [Source:HGNC Symbol;Acc:HGNC:20973]
ENSG00000072110	-1.0890601791208	8.94649387448426e-37	ACTN1	actinin alpha 1 [Source:HGNC Symbol;Acc:HGNC:163]
ENSG00000072163	-2.7449518470668	5.14856547843422e-63	LIMS2	LIM zinc finger domain containing 2 [Source:HGNC Symbol;Acc:HGNC:16084]
ENSG00000072422	-1.18236551524687	1.44562114251901e-07	RHOBTB1	Rho related BTB domain containing 1 [Source:HGNC Symbol;Acc:HGNC:18738]
ENSG00000072501	-0.784417794818264	8.53951611610381e-15	SMC1A	structural maintenance of chromosomes 1A [Source:HGNC Symbol;Acc:HGNC:11111]
ENSG00000072571	-0.914218589536578	1.78013139507947e-13	HMMR	hyaluronan mediated motility receptor [Source:HGNC Symbol;Acc:HGNC:5012]
ENSG00000072682	-1.01118379037735	1.87292594639042e-37	P4HA2	prolyl 4-hydroxylase subunit alpha 2 [Source:HGNC Symbol;Acc:HGNC:8547]
ENSG00000072840	0.424667568149127	2.0028842396613e-08	EVC	EvC ciliary complex subunit 1 [Source:HGNC Symbol;Acc:HGNC:3497]
ENSG00000072849	-0.68190018675361	2.87990702796958e-13	DERL2	derlin 2 [Source:HGNC Symbol;Acc:HGNC:17943]
ENSG00000072864	-0.75362658888101	9.91107177085549e-19	NDE1	nudE neurodevelopment protein 1 [Source:HGNC Symbol;Acc:HGNC:17619]
ENSG00000072958	-0.638521360468745	9.44874829138404e-11	AP1M1	adaptor related protein complex 1 subunit mu 1 [Source:HGNC Symbol;Acc:HGNC:13667]
ENSG00000073008	-0.540074512496623	3.28069995908248e-06	PVR	PVR cell adhesion molecule [Source:HGNC Symbol;Acc:HGNC:9705]
ENSG00000073050	-0.391301980608472	0.000118047073451987	XRCC1	X-ray repair cross complementing 1 [Source:HGNC Symbol;Acc:HGNC:12828]
ENSG00000073060	-1.19043261988625	7.79528046970566e-63	SCARB1	scavenger receptor class B member 1 [Source:HGNC Symbol;Acc:HGNC:1664]
ENSG00000073111	-1.18569340874696	1.12971691519631e-23	MCM2	minichromosome maintenance complex component 2 [Source:HGNC Symbol;Acc:HGNC:6944]
ENSG00000073146	3.88086962168032	1.73836812051109e-05	MOV10L1	Mov10 like RISC complex RNA helicase 1 [Source:HGNC Symbol;Acc:HGNC:7201]
ENSG00000073169	-0.600726939218475	0.000104965012031045	SELENOO	selenoprotein O [Source:HGNC Symbol;Acc:HGNC:30395]
ENSG00000073282	4.20705502910593	0.000150688077963571	TP63	tumor protein p63 [Source:HGNC Symbol;Acc:HGNC:15979]
ENSG00000073331	0.511411626306682	6.86702583303004e-05	ALPK1	alpha kinase 1 [Source:HGNC Symbol;Acc:HGNC:20917]
ENSG00000073464	0.782530468786937	1.9070547502749e-14	CLCN4	chloride voltage-gated channel 4 [Source:HGNC Symbol;Acc:HGNC:2022]
ENSG00000073578	-0.832532624851872	2.24455147809739e-11	SDHA	succinate dehydrogenase complex flavoprotein subunit A [Source:HGNC Symbol;Acc:HGNC:10680]
ENSG00000073584	-0.884755196386063	4.43990863856392e-14	SMARCE1	SWI/SNF related, matrix associated, actin dependent regulator of chromatin, subfamily e, member 1 [Source:HGNC Symbol;Acc:HGNC:11109]
ENSG00000073711	-0.589202824918832	7.33015292181232e-11	PPP2R3A	protein phosphatase 2 regulatory subunit B''alpha [Source:HGNC Symbol;Acc:HGNC:9307]
ENSG00000073712	-0.729331635911324	1.96832355904499e-10	FERMT2	fermitin family member 2 [Source:HGNC Symbol;Acc:HGNC:15767]
ENSG00000073737	2.09726747857212	1.01882117818365e-16	DHRS9	dehydrogenase/reductase 9 [Source:HGNC Symbol;Acc:HGNC:16888]
ENSG00000073849	2.99843356519178	1.02985661260462e-05	ST6GAL1	ST6 beta-galactoside alpha-2,6-sialyltransferase 1 [Source:HGNC Symbol;Acc:HGNC:10860]
ENSG00000074071	-0.405570328233504	0.000293329951994081	MRPS34	mitochondrial ribosomal protein S34 [Source:HGNC Symbol;Acc:HGNC:16618]
ENSG00000074266	-0.356467010553272	9.31865095756574e-05	EED	embryonic ectoderm development [Source:HGNC Symbol;Acc:HGNC:3188]
ENSG00000074356	-0.943426948811277	9.32585133003607e-36	NCBP3	nuclear cap binding subunit 3 [Source:HGNC Symbol;Acc:HGNC:24612]
ENSG00000074410	-1.62472264088208	1.9033154002333e-09	CA12	carbonic anhydrase 12 [Source:HGNC Symbol;Acc:HGNC:1371]
ENSG00000074416	-0.8948572103199	2.06376699480828e-23	MGLL	monoglyceride lipase [Source:HGNC Symbol;Acc:HGNC:17038]
ENSG00000074527	1.47302402836299	2.06905980019558e-15	NTN4	netrin 4 [Source:HGNC Symbol;Acc:HGNC:13658]
ENSG00000074603	-0.27134326328585	3.86057187346449e-05	DPP8	dipeptidyl peptidase 8 [Source:HGNC Symbol;Acc:HGNC:16490]
ENSG00000074660	-1.46934664354623	1.86100963016822e-08	SCARF1	scavenger receptor class F member 1 [Source:HGNC Symbol;Acc:HGNC:16820]
ENSG00000074695	-0.550205610646786	5.42945233566007e-07	LMAN1	lectin, mannose binding 1 [Source:HGNC Symbol;Acc:HGNC:6631]
ENSG00000074696	-0.547557455734808	1.47739339257915e-11	HACD3	3-hydroxyacyl-CoA dehydratase 3 [Source:HGNC Symbol;Acc:HGNC:24175]
ENSG00000074755	-0.74355387968739	5.15884687283907e-21	ZZEF1	zinc finger ZZ-type and EF-hand domain containing 1 [Source:HGNC Symbol;Acc:HGNC:29027]
ENSG00000074800	-0.305709946662241	6.1712021877282e-05	ENO1	enolase 1 [Source:HGNC Symbol;Acc:HGNC:3350]
ENSG00000074803	3.77940919273436	2.10513851629061e-07	SLC12A1	solute carrier family 12 member 1 [Source:HGNC Symbol;Acc:HGNC:10910]
ENSG00000074935	1.59698974951315	1.27628128620975e-05	TUBE1	tubulin epsilon 1 [Source:HGNC Symbol;Acc:HGNC:20775]
ENSG00000075035	4.50806795932365	0.00033890727314908	WSCD2	WSC domain containing 2 [Source:HGNC Symbol;Acc:HGNC:29117]
ENSG00000075142	-0.460377823784635	9.82344504896552e-06	SRI	sorcin [Source:HGNC Symbol;Acc:HGNC:11292]
ENSG00000075213	1.86857832292587	1.31835937372235e-17	SEMA3A	semaphorin 3A [Source:HGNC Symbol;Acc:HGNC:10723]
ENSG00000075218	-1.19287904861652	5.61450198451804e-49	GTSE1	G2 and S-phase expressed 1 [Source:HGNC Symbol;Acc:HGNC:13698]
ENSG00000075223	1.02269009326735	2.46309870794884e-11	SEMA3C	semaphorin 3C [Source:HGNC Symbol;Acc:HGNC:10725]
ENSG00000075234	0.309253057503827	0.000315514793340743	TTC38	tetratricopeptide repeat domain 38 [Source:HGNC Symbol;Acc:HGNC:26082]
ENSG00000075239	-0.388726537118291	6.23374693509136e-06	ACAT1	acetyl-CoA acetyltransferase 1 [Source:HGNC Symbol;Acc:HGNC:93]
ENSG00000075240	-1.43112662744015	1.40748083246347e-05	GRAMD4	GRAM domain containing 4 [Source:HGNC Symbol;Acc:HGNC:29113]
ENSG00000075275	-0.679305887711991	6.49782869340022e-12	CELSR1	cadherin EGF LAG seven-pass G-type receptor 1 [Source:HGNC Symbol;Acc:HGNC:1850]
ENSG00000075303	-0.645454685871716	4.37955242012227e-27	SLC25A40	solute carrier family 25 member 40 [Source:HGNC Symbol;Acc:HGNC:29680]
ENSG00000075336	-0.844138841215683	4.66934026304576e-10	TIMM21	translocase of inner mitochondrial membrane 21 [Source:HGNC Symbol;Acc:HGNC:25010]
ENSG00000075539	-0.508528450332944	4.22364362478813e-06	FRYL	FRY like transcription coactivator [Source:HGNC Symbol;Acc:HGNC:29127]
ENSG00000075618	-1.12915845481839	5.71194927700732e-26	FSCN1	fascin actin-bundling protein 1 [Source:HGNC Symbol;Acc:HGNC:11148]
ENSG00000075624	-0.762690471069944	1.01398424745414e-18	ACTB	actin beta [Source:HGNC Symbol;Acc:HGNC:132]
ENSG00000075643	0.801302294230777	4.5013334324928e-05	MOCOS	molybdenum cofactor sulfurase [Source:HGNC Symbol;Acc:HGNC:18234]
ENSG00000075651	0.816571161024015	3.16878002105984e-05	PLD1	phospholipase D1 [Source:HGNC Symbol;Acc:HGNC:9067]
ENSG00000075702	-0.638785656277499	2.46452010643526e-09	WDR62	WD repeat domain 62 [Source:HGNC Symbol;Acc:HGNC:24502]
ENSG00000075891	-0.700733555715612	1.14847512656697e-05	PAX2	paired box 2 [Source:HGNC Symbol;Acc:HGNC:8616]
ENSG00000075945	-0.432702773295429	1.92311902127979e-06	KIFAP3	kinesin associated protein 3 [Source:HGNC Symbol;Acc:HGNC:17060]
ENSG00000076003	-0.570379985428419	3.41739551154244e-12	MCM6	minichromosome maintenance complex component 6 [Source:HGNC Symbol;Acc:HGNC:6949]
ENSG00000076201	-0.70494242395084	1.67284846218052e-09	PTPN23	protein tyrosine phosphatase non-receptor type 23 [Source:HGNC Symbol;Acc:HGNC:14406]
ENSG00000076248	-1.22069689481107	4.08067289844508e-28	UNG	uracil DNA glycosylase [Source:HGNC Symbol;Acc:HGNC:12572]
ENSG00000076351	-3.10281989110373	8.98559808174623e-19	SLC46A1	solute carrier family 46 member 1 [Source:HGNC Symbol;Acc:HGNC:30521]
ENSG00000076356	-1.39989786015591	1.38532535707259e-12	PLXNA2	plexin A2 [Source:HGNC Symbol;Acc:HGNC:9100]
ENSG00000076382	-1.24806973917358	9.42549981297425e-35	SPAG5	sperm associated antigen 5 [Source:HGNC Symbol;Acc:HGNC:13452]
ENSG00000076513	-0.715454103722573	2.16444304094876e-15	ANKRD13A	ankyrin repeat domain 13A [Source:HGNC Symbol;Acc:HGNC:21268]
ENSG00000076555	1.13592730473271	1.30958380292687e-05	ACACB	acetyl-CoA carboxylase beta [Source:HGNC Symbol;Acc:HGNC:85]
ENSG00000076650	-0.377903395403043	0.000189224768065441	GPATCH1	G-patch domain containing 1 [Source:HGNC Symbol;Acc:HGNC:24658]
ENSG00000076706	-2.73233877641373	1.82349627133316e-48	MCAM	melanoma cell adhesion molecule [Source:HGNC Symbol;Acc:HGNC:6934]
ENSG00000076716	-0.573175544635834	7.24372037526716e-15	GPC4	glypican 4 [Source:HGNC Symbol;Acc:HGNC:4452]
ENSG00000076928	-0.675777220520112	7.03944743441299e-23	ARHGEF1	Rho guanine nucleotide exchange factor 1 [Source:HGNC Symbol;Acc:HGNC:681]
ENSG00000077150	0.684184448370642	1.10009356245428e-13	NFKB2	nuclear factor kappa B subunit 2 [Source:HGNC Symbol;Acc:HGNC:7795]
ENSG00000077152	-0.622167948204505	1.98957416179399e-09	UBE2T	ubiquitin conjugating enzyme E2 T [Source:HGNC Symbol;Acc:HGNC:25009]
ENSG00000077232	0.498939342271747	6.56709577067622e-05	DNAJC10	DnaJ heat shock protein family (Hsp40) member C10 [Source:HGNC Symbol;Acc:HGNC:24637]
ENSG00000077274	3.38720904167435	2.68243763837212e-07	CAPN6	calpain 6 [Source:HGNC Symbol;Acc:HGNC:1483]
ENSG00000077454	-0.516185512233568	8.20610679508524e-06	LRCH4	leucine rich repeats and calponin homology domain containing 4 [Source:HGNC Symbol;Acc:HGNC:6691]
ENSG00000077514	-0.538409690166866	9.28957362613816e-07	POLD3	DNA polymerase delta 3, accessory subunit [Source:HGNC Symbol;Acc:HGNC:20932]
ENSG00000077522	2.91261715978429	4.40596173924885e-10	ACTN2	actinin alpha 2 [Source:HGNC Symbol;Acc:HGNC:164]
ENSG00000077549	-0.451389653298024	1.02459580536113e-07	CAPZB	capping actin protein of muscle Z-line subunit beta [Source:HGNC Symbol;Acc:HGNC:1491]
ENSG00000077585	0.482539659637662	9.05444668134568e-05	GPR137B	G protein-coupled receptor 137B [Source:HGNC Symbol;Acc:HGNC:11862]
ENSG00000077684	-0.718314289900875	2.71554446794841e-12	JADE1	jade family PHD finger 1 [Source:HGNC Symbol;Acc:HGNC:30027]
ENSG00000077713	-0.583447524651241	6.65184549713325e-17	SLC25A43	solute carrier family 25 member 43 [Source:HGNC Symbol;Acc:HGNC:30557]
ENSG00000077942	1.33974216247616	0.000811625766942122	FBLN1	fibulin 1 [Source:HGNC Symbol;Acc:HGNC:3600]
ENSG00000077984	2.86981750519477	0.00011396194288741	CST7	cystatin F [Source:HGNC Symbol;Acc:HGNC:2479]
ENSG00000078043	-0.526782263948657	8.13567716106963e-07	PIAS2	protein inhibitor of activated STAT 2 [Source:HGNC Symbol;Acc:HGNC:17311]
ENSG00000078061	-0.41325325286952	2.05976754064015e-06	ARAF	A-Raf proto-oncogene, serine/threonine kinase [Source:HGNC Symbol;Acc:HGNC:646]
ENSG00000078081	1.83365181646459	0.000284524058230899	LAMP3	lysosomal associated membrane protein 3 [Source:HGNC Symbol;Acc:HGNC:14582]
ENSG00000078114	0.423468259222622	0.000267671536757296	NEBL	nebulette [Source:HGNC Symbol;Acc:HGNC:16932]
ENSG00000078124	-0.885485140680947	8.12100157282531e-25	ACER3	alkaline ceramidase 3 [Source:HGNC Symbol;Acc:HGNC:16066]
ENSG00000078237	1.65260418460847	1.06825977916611e-13	TIGAR	TP53 induced glycolysis regulatory phosphatase [Source:HGNC Symbol;Acc:HGNC:1185]
ENSG00000078304	-0.536820017944234	1.27023544830982e-09	PPP2R5C	protein phosphatase 2 regulatory subunit B'gamma [Source:HGNC Symbol;Acc:HGNC:9311]
ENSG00000078369	-0.559786806755263	1.4601094359606e-17	GNB1	G protein subunit beta 1 [Source:HGNC Symbol;Acc:HGNC:4396]
ENSG00000078399	-0.527978090441623	5.65015526451369e-17	HOXA9	homeobox A9 [Source:HGNC Symbol;Acc:HGNC:5109]
ENSG00000078401	-3.76267549253749	8.84261888069192e-136	EDN1	endothelin 1 [Source:HGNC Symbol;Acc:HGNC:3176]
ENSG00000078668	-0.63789282771912	9.18718586123364e-16	VDAC3	voltage dependent anion channel 3 [Source:HGNC Symbol;Acc:HGNC:12674]
ENSG00000078699	-0.338540694629461	0.000178859052413193	CBFA2T2	CBFA2/RUNX1 partner transcriptional co-repressor 2 [Source:HGNC Symbol;Acc:HGNC:1536]
ENSG00000078725	-4.04816752555144	4.86818143671628e-50	BRINP1	BMP/retinoic acid inducible neural specific 1 [Source:HGNC Symbol;Acc:HGNC:2687]
ENSG00000078808	-0.359735544941091	3.54518114692126e-05	SDF4	stromal cell derived factor 4 [Source:HGNC Symbol;Acc:HGNC:24188]
ENSG00000078900	-2.86331509568774	7.09737417091773e-15	TP73	tumor protein p73 [Source:HGNC Symbol;Acc:HGNC:12003]
ENSG00000079112	1.8558188513969	1.36205125708526e-13	CDH17	cadherin 17 [Source:HGNC Symbol;Acc:HGNC:1756]
ENSG00000079215	2.27279788599951	4.27495660725983e-38	SLC1A3	solute carrier family 1 member 3 [Source:HGNC Symbol;Acc:HGNC:10941]
ENSG00000079263	2.55939284278509	4.7915578518023e-146	SP140	SP140 nuclear body protein [Source:HGNC Symbol;Acc:HGNC:17133]
ENSG00000079308	-1.67503293844402	1.12832067602913e-23	TNS1	tensin 1 [Source:HGNC Symbol;Acc:HGNC:11973]
ENSG00000079332	-0.335177715699632	0.000171358383325419	SAR1A	secretion associated Ras related GTPase 1A [Source:HGNC Symbol;Acc:HGNC:10534]
ENSG00000079337	2.67843517156692	9.76291830404243e-37	RAPGEF3	Rap guanine nucleotide exchange factor 3 [Source:HGNC Symbol;Acc:HGNC:16629]
ENSG00000079385	1.92741198429046	3.57437742072694e-05	CEACAM1	carcinoembryonic antigen related cell adhesion molecule 1 [Source:HGNC Symbol;Acc:HGNC:1814]
ENSG00000079432	-0.7385859418717	3.43126445115962e-06	CIC	capicua transcriptional repressor [Source:HGNC Symbol;Acc:HGNC:14214]
ENSG00000079462	-1.06471947197297	3.89792373611178e-21	PAFAH1B3	platelet activating factor acetylhydrolase 1b catalytic subunit 3 [Source:HGNC Symbol;Acc:HGNC:8576]
ENSG00000079482	0.65043977133204	4.90079155594948e-05	OPHN1	oligophrenin 1 [Source:HGNC Symbol;Acc:HGNC:8148]
ENSG00000079616	-0.816942853016793	1.18568740050929e-34	KIF22	kinesin family member 22 [Source:HGNC Symbol;Acc:HGNC:6391]
ENSG00000079691	-0.600530003568172	7.5315760965872e-14	CARMIL1	capping protein regulator and myosin 1 linker 1 [Source:HGNC Symbol;Acc:HGNC:21581]
ENSG00000079841	4.2380044360868	1.10228770858441e-05	RIMS1	regulating synaptic membrane exocytosis 1 [Source:HGNC Symbol;Acc:HGNC:17282]
ENSG00000079931	-1.43141513417772	3.42388197815909e-79	MOXD1	monooxygenase DBH like 1 [Source:HGNC Symbol;Acc:HGNC:21063]
ENSG00000079974	0.366913809254643	0.000528840688515667	RABL2B	RAB, member of RAS oncogene family like 2B [Source:HGNC Symbol;Acc:HGNC:9800]
ENSG00000080166	2.8112246430174	3.68808063238015e-06	DCT	dopachrome tautomerase [Source:HGNC Symbol;Acc:HGNC:2709]
ENSG00000080200	-0.428241503170752	2.60129933410657e-06	CRYBG3	crystallin beta-gamma domain containing 3 [Source:HGNC Symbol;Acc:HGNC:34427]
ENSG00000080546	0.794012527596852	1.17955361287798e-08	SESN1	sestrin 1 [Source:HGNC Symbol;Acc:HGNC:21595]
ENSG00000080815	-0.400622303257287	7.83152928208228e-10	PSEN1	presenilin 1 [Source:HGNC Symbol;Acc:HGNC:9508]
ENSG00000080824	-0.443580893508987	0.000163319295402494	HSP90AA1	heat shock protein 90 alpha family class A member 1 [Source:HGNC Symbol;Acc:HGNC:5253]
ENSG00000080839	-0.769353126384283	1.48525528881117e-12	RBL1	RB transcriptional corepressor like 1 [Source:HGNC Symbol;Acc:HGNC:9893]
ENSG00000080845	-0.411218917939486	3.1795675517445e-05	DLGAP4	DLG associated protein 4 [Source:HGNC Symbol;Acc:HGNC:24476]
ENSG00000080986	-0.564026370748699	0.000203765635943105	NDC80	NDC80 kinetochore complex component [Source:HGNC Symbol;Acc:HGNC:16909]
ENSG00000081026	-0.673217743814905	1.22757479946661e-06	MAGI3	membrane associated guanylate kinase, WW and PDZ domain containing 3 [Source:HGNC Symbol;Acc:HGNC:29647]
ENSG00000081041	3.16573177683233	1.52230952298098e-17	CXCL2	C-X-C motif chemokine ligand 2 [Source:HGNC Symbol;Acc:HGNC:4603]
ENSG00000081051	1.88966863567629	4.07254362241559e-06	AFP	alpha fetoprotein [Source:HGNC Symbol;Acc:HGNC:317]
ENSG00000081087	0.415912563624621	0.000704016040124888	OSTM1	osteoclastogenesis associated transmembrane protein 1 [Source:HGNC Symbol;Acc:HGNC:21652]
ENSG00000081177	-0.783908851300354	1.31115402156606e-08	EXD2	exonuclease 3'-5' domain containing 2 [Source:HGNC Symbol;Acc:HGNC:20217]
ENSG00000081181	1.16188947492473	1.64707961552535e-11	ARG2	arginase 2 [Source:HGNC Symbol;Acc:HGNC:664]
ENSG00000081277	3.8118948670102	5.13024022027614e-06	PKP1	plakophilin 1 [Source:HGNC Symbol;Acc:HGNC:9023]
ENSG00000081479	2.10497638818383	0.000331535754991249	LRP2	LDL receptor related protein 2 [Source:HGNC Symbol;Acc:HGNC:6694]
ENSG00000081665	0.576374241269239	3.18693012822862e-06	ZNF506	zinc finger protein 506 [Source:HGNC Symbol;Acc:HGNC:23780]
ENSG00000081913	-0.914192808643847	1.31717163631382e-06	PHLPP1	PH domain and leucine rich repeat protein phosphatase 1 [Source:HGNC Symbol;Acc:HGNC:20610]
ENSG00000081923	-1.11242968818651	2.6782658953262e-11	ATP8B1	ATPase phospholipid transporting 8B1 [Source:HGNC Symbol;Acc:HGNC:3706]
ENSG00000082014	-1.16099550397933	1.39369800383845e-19	SMARCD3	SWI/SNF related, matrix associated, actin dependent regulator of chromatin, subfamily d, member 3 [Source:HGNC Symbol;Acc:HGNC:11108]
ENSG00000082068	-0.506249428085711	1.70243879443101e-05	WDR70	WD repeat domain 70 [Source:HGNC Symbol;Acc:HGNC:25495]
ENSG00000082074	3.22958797613081	1.53133983911759e-05	FYB1	FYN binding protein 1 [Source:HGNC Symbol;Acc:HGNC:4036]
ENSG00000082126	2.50298490541954	4.29283672981026e-17	MPP4	membrane palmitoylated protein 4 [Source:HGNC Symbol;Acc:HGNC:13680]
ENSG00000082497	-0.603688955147832	0.000489480989717512	SERTAD4	SERTA domain containing 4 [Source:HGNC Symbol;Acc:HGNC:25236]
ENSG00000082512	-0.939461047053349	0.000342812220350954	TRAF5	TNF receptor associated factor 5 [Source:HGNC Symbol;Acc:HGNC:12035]
ENSG00000082516	-0.611295922778637	1.22117818400771e-16	GEMIN5	gem nuclear organelle associated protein 5 [Source:HGNC Symbol;Acc:HGNC:20043]
ENSG00000082684	-4.19058267866687	3.44164984662183e-15	SEMA5B	semaphorin 5B [Source:HGNC Symbol;Acc:HGNC:10737]
ENSG00000082781	-1.1815691812657	4.58828162756583e-60	ITGB5	integrin subunit beta 5 [Source:HGNC Symbol;Acc:HGNC:6160]
ENSG00000082898	-0.468141735183602	4.51346693726696e-09	XPO1	exportin 1 [Source:HGNC Symbol;Acc:HGNC:12825]
ENSG00000083093	0.476670098298315	0.000567425575624828	PALB2	partner and localizer of BRCA2 [Source:HGNC Symbol;Acc:HGNC:26144]
ENSG00000083168	-0.462521783459872	2.45645848044459e-05	KAT6A	lysine acetyltransferase 6A [Source:HGNC Symbol;Acc:HGNC:13013]
ENSG00000083290	4.60081272966319	2.11536448020708e-24	ULK2	unc-51 like autophagy activating kinase 2 [Source:HGNC Symbol;Acc:HGNC:13480]
ENSG00000083444	-0.4096807985545	2.58085637373038e-11	PLOD1	procollagen-lysine,2-oxoglutarate 5-dioxygenase 1 [Source:HGNC Symbol;Acc:HGNC:9081]
ENSG00000083457	-0.933262953078189	1.52026446727931e-13	ITGAE	integrin subunit alpha E [Source:HGNC Symbol;Acc:HGNC:6147]
ENSG00000083642	-0.972797947393918	4.07453070699002e-15	PDS5B	PDS5 cohesin associated factor B [Source:HGNC Symbol;Acc:HGNC:20418]
ENSG00000083720	-0.563245528141567	0.00022127877140671	OXCT1	3-oxoacid CoA-transferase 1 [Source:HGNC Symbol;Acc:HGNC:8527]
ENSG00000083799	1.40569873063113	3.70837409610245e-22	CYLD	CYLD lysine 63 deubiquitinase [Source:HGNC Symbol;Acc:HGNC:2584]
ENSG00000083807	1.05942010195742	0.000876375441454373	SLC27A5	solute carrier family 27 member 5 [Source:HGNC Symbol;Acc:HGNC:10999]
ENSG00000083857	-0.850305642450534	5.22552111559014e-06	FAT1	FAT atypical cadherin 1 [Source:HGNC Symbol;Acc:HGNC:3595]
ENSG00000084072	0.36174451746279	0.000565673514564422	PPIE	peptidylprolyl isomerase E [Source:HGNC Symbol;Acc:HGNC:9258]
ENSG00000084092	-0.346282383313757	3.31933179105911e-08	NOA1	nitric oxide associated 1 [Source:HGNC Symbol;Acc:HGNC:28473]
ENSG00000084453	2.54681336121785	2.03093433826723e-06	SLCO1A2	solute carrier organic anion transporter family member 1A2 [Source:HGNC Symbol;Acc:HGNC:10956]
ENSG00000084623	0.338130406636867	2.96769215366019e-06	EIF3I	eukaryotic translation initiation factor 3 subunit I [Source:HGNC Symbol;Acc:HGNC:3272]
ENSG00000084628	4.4318796345059	0.000187815376360292	NKAIN1	sodium/potassium transporting ATPase interacting 1 [Source:HGNC Symbol;Acc:HGNC:25743]
ENSG00000084636	2.0641921041602	1.23078394790486e-07	COL16A1	collagen type XVI alpha 1 chain [Source:HGNC Symbol;Acc:HGNC:2193]
ENSG00000084676	-0.511669857209544	5.966500071013e-06	NCOA1	nuclear receptor coactivator 1 [Source:HGNC Symbol;Acc:HGNC:7668]
ENSG00000084710	2.4377106776202	6.75172707740772e-10	EFR3B	EFR3 homolog B [Source:HGNC Symbol;Acc:HGNC:29155]
ENSG00000084754	0.2759048427549	0.000479955494258654	HADHA	hydroxyacyl-CoA dehydrogenase trifunctional multienzyme complex subunit alpha [Source:HGNC Symbol;Acc:HGNC:4801]
ENSG00000085063	-0.514555124045844	3.07619205699559e-11	CD59	CD59 molecule (CD59 blood group) [Source:HGNC Symbol;Acc:HGNC:1689]
ENSG00000085377	-0.430656633266791	2.5764826550797e-05	PREP	prolyl endopeptidase [Source:HGNC Symbol;Acc:HGNC:9358]
ENSG00000085465	0.632173421225338	0.000497912732687821	OVGP1	oviductal glycoprotein 1 [Source:HGNC Symbol;Acc:HGNC:8524]
ENSG00000085491	-0.467103355843283	2.34579031146163e-10	SLC25A24	solute carrier family 25 member 24 [Source:HGNC Symbol;Acc:HGNC:20662]
ENSG00000085511	-0.875899902734014	2.90374264227703e-20	MAP3K4	mitogen-activated protein kinase kinase kinase 4 [Source:HGNC Symbol;Acc:HGNC:6856]
ENSG00000085662	0.472268179470929	1.14923280936349e-15	AKR1B1	aldo-keto reductase family 1 member B [Source:HGNC Symbol;Acc:HGNC:381]
ENSG00000085719	-0.458818600436792	2.03933285636174e-14	CPNE3	copine 3 [Source:HGNC Symbol;Acc:HGNC:2316]
ENSG00000085721	0.760950084681265	9.1067982564434e-07	RRN3	RRN3 homolog, RNA polymerase I transcription factor [Source:HGNC Symbol;Acc:HGNC:30346]
ENSG00000085788	-0.511412046137521	1.15551256164692e-06	DDHD2	DDHD domain containing 2 [Source:HGNC Symbol;Acc:HGNC:29106]
ENSG00000085831	0.939576098240833	6.5816333516822e-05	TTC39A	tetratricopeptide repeat domain 39A [Source:HGNC Symbol;Acc:HGNC:18657]
ENSG00000085840	-1.37053493040216	2.4940908404967e-08	ORC1	origin recognition complex subunit 1 [Source:HGNC Symbol;Acc:HGNC:8487]
ENSG00000085978	0.502710645131715	3.44393861427651e-05	ATG16L1	autophagy related 16 like 1 [Source:HGNC Symbol;Acc:HGNC:21498]
ENSG00000085982	0.409035743710252	0.000580498478237767	USP40	ubiquitin specific peptidase 40 [Source:HGNC Symbol;Acc:HGNC:20069]
ENSG00000085999	-0.943741610374872	9.38994860016295e-12	RAD54L	RAD54 like [Source:HGNC Symbol;Acc:HGNC:9826]
ENSG00000086015	-0.624099104098719	3.90027708714999e-17	MAST2	microtubule associated serine/threonine kinase 2 [Source:HGNC Symbol;Acc:HGNC:19035]
ENSG00000086061	-0.724110128358796	8.73582750626205e-11	DNAJA1	DnaJ heat shock protein family (Hsp40) member A1 [Source:HGNC Symbol;Acc:HGNC:5229]
ENSG00000086065	0.343089146356538	2.48763064868468e-05	CHMP5	charged multivesicular body protein 5 [Source:HGNC Symbol;Acc:HGNC:26942]
ENSG00000086289	-0.604361814097746	1.52708281308447e-06	EPDR1	ependymin related 1 [Source:HGNC Symbol;Acc:HGNC:17572]
ENSG00000086300	-0.76359768463985	5.19744606800444e-09	SNX10	sorting nexin 10 [Source:HGNC Symbol;Acc:HGNC:14974]
ENSG00000086475	-0.481891820919289	1.44928635002854e-07	SEPHS1	selenophosphate synthetase 1 [Source:HGNC Symbol;Acc:HGNC:19685]
ENSG00000086570	3.24056149065424	9.25829841897777e-81	FAT2	FAT atypical cadherin 2 [Source:HGNC Symbol;Acc:HGNC:3596]
ENSG00000086598	-0.611903609140185	2.44942176337257e-14	TMED2	transmembrane p24 trafficking protein 2 [Source:HGNC Symbol;Acc:HGNC:16996]
ENSG00000086730	2.73935620573025	2.74891188144675e-21	LAT2	linker for activation of T cells family member 2 [Source:HGNC Symbol;Acc:HGNC:12749]
ENSG00000086827	-0.522820864183034	9.18726496162704e-08	ZW10	zw10 kinetochore protein [Source:HGNC Symbol;Acc:HGNC:13194]
ENSG00000086967	4.80633098278512	0.000705409099435204	MYBPC2	myosin binding protein C, fast type [Source:HGNC Symbol;Acc:HGNC:7550]
ENSG00000087074	1.38489324018019	5.93564586970071e-06	PPP1R15A	protein phosphatase 1 regulatory subunit 15A [Source:HGNC Symbol;Acc:HGNC:14375]
ENSG00000087077	-0.463048665323742	8.38613079808372e-06	TRIP6	thyroid hormone receptor interactor 6 [Source:HGNC Symbol;Acc:HGNC:12311]
ENSG00000087087	-0.683305310995508	5.18334775301915e-14	SRRT	serrate, RNA effector molecule [Source:HGNC Symbol;Acc:HGNC:24101]
ENSG00000087111	-0.425633995779268	1.90296851337793e-06	PIGS	phosphatidylinositol glycan anchor biosynthesis class S [Source:HGNC Symbol;Acc:HGNC:14937]
ENSG00000087116	1.05641051911179	7.56980340504758e-09	ADAMTS2	ADAM metallopeptidase with thrombospondin type 1 motif 2 [Source:HGNC Symbol;Acc:HGNC:218]
ENSG00000087157	0.39158926694335	1.45201172683474e-07	PGS1	phosphatidylglycerophosphate synthase 1 [Source:HGNC Symbol;Acc:HGNC:30029]
ENSG00000087206	-0.339446551218735	0.000528739106335088	UIMC1	ubiquitin interaction motif containing 1 [Source:HGNC Symbol;Acc:HGNC:30298]
ENSG00000087245	-0.758366831251012	4.28889543838926e-16	MMP2	matrix metallopeptidase 2 [Source:HGNC Symbol;Acc:HGNC:7166]
ENSG00000087253	-1.28476582340371	1.39024405615707e-12	LPCAT2	lysophosphatidylcholine acyltransferase 2 [Source:HGNC Symbol;Acc:HGNC:26032]
ENSG00000087258	3.10658631331257	1.97343576251193e-05	GNAO1	G protein subunit alpha o1 [Source:HGNC Symbol;Acc:HGNC:4389]
ENSG00000087263	0.645497831672057	0.000583842873289292	OGFOD1	2-oxoglutarate and iron dependent oxygenase domain containing 1 [Source:HGNC Symbol;Acc:HGNC:25585]
ENSG00000087266	-0.877382277944039	6.47621702399952e-20	SH3BP2	SH3 domain binding protein 2 [Source:HGNC Symbol;Acc:HGNC:10825]
ENSG00000087274	-0.781580059451486	5.64626461609381e-16	ADD1	adducin 1 [Source:HGNC Symbol;Acc:HGNC:243]
ENSG00000087299	-1.07859602525638	8.11300370942479e-12	L2HGDH	L-2-hydroxyglutarate dehydrogenase [Source:HGNC Symbol;Acc:HGNC:20499]
ENSG00000087301	-0.829625631607436	2.71046325523871e-17	TXNDC16	thioredoxin domain containing 16 [Source:HGNC Symbol;Acc:HGNC:19965]
ENSG00000087303	0.990148958517879	1.96225157473991e-05	NID2	nidogen 2 [Source:HGNC Symbol;Acc:HGNC:13389]
ENSG00000087338	-0.763718902087388	0.000103463208124121	GMCL1	germ cell-less 1, spermatogenesis associated [Source:HGNC Symbol;Acc:HGNC:23843]
ENSG00000087365	-0.418992463577815	9.73383951916701e-08	SF3B2	splicing factor 3b subunit 2 [Source:HGNC Symbol;Acc:HGNC:10769]
ENSG00000087460	-0.804791242017941	2.55206231534626e-13	GNAS	GNAS complex locus [Source:HGNC Symbol;Acc:HGNC:4392]
ENSG00000087586	-0.908035091061344	4.50881192173635e-32	AURKA	aurora kinase A [Source:HGNC Symbol;Acc:HGNC:11393]
ENSG00000087589	2.98196919209219	1.90918210564206e-21	CASS4	Cas scaffold protein family member 4 [Source:HGNC Symbol;Acc:HGNC:15878]
ENSG00000087884	-0.84107068479986	2.83264040052989e-07	AAMDC	adipogenesis associated Mth938 domain containing [Source:HGNC Symbol;Acc:HGNC:30205]
ENSG00000087903	-0.83894429898937	7.21102443616983e-12	RFX2	regulatory factor X2 [Source:HGNC Symbol;Acc:HGNC:9983]
ENSG00000088035	-0.524315436507257	3.9150885153625e-05	ALG6	ALG6 alpha-1,3-glucosyltransferase [Source:HGNC Symbol;Acc:HGNC:23157]
ENSG00000088038	-0.378086999691943	1.98311645116669e-06	CNOT3	CCR4-NOT transcription complex subunit 3 [Source:HGNC Symbol;Acc:HGNC:7879]
ENSG00000088247	-0.704072739488302	3.78500002905951e-25	KHSRP	KH-type splicing regulatory protein [Source:HGNC Symbol;Acc:HGNC:6316]
ENSG00000088256	-0.53804943184623	1.96516147143268e-08	GNA11	G protein subunit alpha 11 [Source:HGNC Symbol;Acc:HGNC:4379]
ENSG00000088298	-0.440733198561304	9.10340370829928e-10	EDEM2	ER degradation enhancing alpha-mannosidase like protein 2 [Source:HGNC Symbol;Acc:HGNC:15877]
ENSG00000088305	1.87084543278929	2.83962765111455e-22	DNMT3B	DNA methyltransferase 3 beta [Source:HGNC Symbol;Acc:HGNC:2979]
ENSG00000088325	-1.07569135164974	4.56956586099055e-25	TPX2	TPX2 microtubule nucleation factor [Source:HGNC Symbol;Acc:HGNC:1249]
ENSG00000088340	-1.26967983407247	6.61092218269113e-07	FER1L4	fer-1 like family member 4 (pseudogene) [Source:HGNC Symbol;Acc:HGNC:15801]
ENSG00000088386	1.69184404350199	0.000556053938606413	SLC15A1	solute carrier family 15 member 1 [Source:HGNC Symbol;Acc:HGNC:10920]
ENSG00000088538	0.583662117608939	0.000169112181671032	DOCK3	dedicator of cytokinesis 3 [Source:HGNC Symbol;Acc:HGNC:2989]
ENSG00000088682	0.456345765003249	5.80541496328651e-05	COQ9	coenzyme Q9 [Source:HGNC Symbol;Acc:HGNC:25302]
ENSG00000088808	-0.504000776970459	6.41583030406367e-05	PPP1R13B	protein phosphatase 1 regulatory subunit 13B [Source:HGNC Symbol;Acc:HGNC:14950]
ENSG00000088812	-0.294686954786058	4.41584984186445e-05	ATRN	attractin [Source:HGNC Symbol;Acc:HGNC:885]
ENSG00000088826	0.465900673940188	8.83751989823173e-13	SMOX	spermine oxidase [Source:HGNC Symbol;Acc:HGNC:15862]
ENSG00000088832	-0.486213769223915	7.47859989990428e-11	FKBP1A	FKBP prolyl isomerase 1A [Source:HGNC Symbol;Acc:HGNC:3711]
ENSG00000088833	-0.492178993827317	9.30364473661811e-05	NSFL1C	NSFL1 cofactor [Source:HGNC Symbol;Acc:HGNC:15912]
ENSG00000088888	-0.461272097372893	2.18824730796069e-10	MAVS	mitochondrial antiviral signaling protein [Source:HGNC Symbol;Acc:HGNC:29233]
ENSG00000088986	-0.723092601713462	4.79897253770839e-18	DYNLL1	dynein light chain LC8-type 1 [Source:HGNC Symbol;Acc:HGNC:15476]
ENSG00000088992	1.10145866981182	9.43360055175276e-06	TESC	tescalcin [Source:HGNC Symbol;Acc:HGNC:26065]
ENSG00000089009	-0.276230356648716	0.000381980089648477	RPL6	ribosomal protein L6 [Source:HGNC Symbol;Acc:HGNC:10362]
ENSG00000089041	2.61738144754818	2.10251511051247e-09	P2RX7	purinergic receptor P2X 7 [Source:HGNC Symbol;Acc:HGNC:8537]
ENSG00000089053	-0.364008970356352	3.17297169182764e-08	ANAPC5	anaphase promoting complex subunit 5 [Source:HGNC Symbol;Acc:HGNC:15713]
ENSG00000089057	-0.378494315836326	2.52785526498321e-05	SLC23A2	solute carrier family 23 member 2 [Source:HGNC Symbol;Acc:HGNC:10973]
ENSG00000089060	-0.794720799510295	1.43014446612117e-10	SLC8B1	solute carrier family 8 member B1 [Source:HGNC Symbol;Acc:HGNC:26175]
ENSG00000089094	-0.986990192635673	3.40454284278179e-13	KDM2B	lysine demethylase 2B [Source:HGNC Symbol;Acc:HGNC:13610]
ENSG00000089127	2.47344781797981	1.65147276557336e-14	OAS1	2'-5'-oligoadenylate synthetase 1 [Source:HGNC Symbol;Acc:HGNC:8086]
ENSG00000089157	-0.341480582255802	1.9789378732591e-07	RPLP0	ribosomal protein lateral stalk subunit P0 [Source:HGNC Symbol;Acc:HGNC:10371]
ENSG00000089159	-1.09627431706493	6.23194640398773e-20	PXN	paxillin [Source:HGNC Symbol;Acc:HGNC:9718]
ENSG00000089177	-0.735701752361876	4.96091174430115e-12	KIF16B	kinesin family member 16B [Source:HGNC Symbol;Acc:HGNC:15869]
ENSG00000089250	2.45214854114907	2.66998184173519e-05	NOS1	nitric oxide synthase 1 [Source:HGNC Symbol;Acc:HGNC:7872]
ENSG00000089327	-0.57636750010171	2.22334376319226e-06	FXYD5	FXYD domain containing ion transport regulator 5 [Source:HGNC Symbol;Acc:HGNC:4029]
ENSG00000089351	-0.240075214400933	0.00044429071654679	GRAMD1A	GRAM domain containing 1A [Source:HGNC Symbol;Acc:HGNC:29305]
ENSG00000089597	-0.446428609876497	1.56422822147672e-12	GANAB	glucosidase II alpha subunit [Source:HGNC Symbol;Acc:HGNC:4138]
ENSG00000089685	-0.700043970001149	7.88416090697613e-13	BIRC5	baculoviral IAP repeat containing 5 [Source:HGNC Symbol;Acc:HGNC:593]
ENSG00000089737	-0.719114117809057	1.35605367717074e-11	DDX24	DEAD-box helicase 24 [Source:HGNC Symbol;Acc:HGNC:13266]
ENSG00000089818	0.838802604091634	1.41715615849745e-05	NECAP1	NECAP endocytosis associated 1 [Source:HGNC Symbol;Acc:HGNC:24539]
ENSG00000089847	2.7209792918343	4.33558737523447e-12	ANKRD24	ankyrin repeat domain 24 [Source:HGNC Symbol;Acc:HGNC:29424]
ENSG00000089902	-0.880087273581117	5.08633915717264e-26	RCOR1	REST corepressor 1 [Source:HGNC Symbol;Acc:HGNC:17441]
ENSG00000090006	-1.47685713601855	8.42748637755952e-24	LTBP4	latent transforming growth factor beta binding protein 4 [Source:HGNC Symbol;Acc:HGNC:6717]
ENSG00000090020	0.774510023479377	0.000304850523289454	SLC9A1	solute carrier family 9 member A1 [Source:HGNC Symbol;Acc:HGNC:11071]
ENSG00000090060	-0.529050190144933	2.73744743816764e-06	PAPOLA	poly(A) polymerase alpha [Source:HGNC Symbol;Acc:HGNC:14981]
ENSG00000090061	-0.63181118257388	3.66043073124712e-14	CCNK	cyclin K [Source:HGNC Symbol;Acc:HGNC:1596]
ENSG00000090097	-0.813648092734138	4.22819725254473e-18	PCBP4	poly(rC) binding protein 4 [Source:HGNC Symbol;Acc:HGNC:8652]
ENSG00000090238	1.19184648606026	2.54858504775816e-09	YPEL3	yippee like 3 [Source:HGNC Symbol;Acc:HGNC:18327]
ENSG00000090316	-0.677441431874076	6.46859877875365e-11	MAEA	macrophage erythroblast attacher [Source:HGNC Symbol;Acc:HGNC:13731]
ENSG00000090339	0.606412635339624	1.1311729581152e-14	ICAM1	intercellular adhesion molecule 1 [Source:HGNC Symbol;Acc:HGNC:5344]
ENSG00000090372	-0.385694247080307	5.59425926029309e-06	STRN4	striatin 4 [Source:HGNC Symbol;Acc:HGNC:15721]
ENSG00000090402	4.28217496456658	3.73970561433485e-06	SI	sucrase-isomaltase [Source:HGNC Symbol;Acc:HGNC:10856]
ENSG00000090432	-0.459303669682763	0.000395420804182496	MUL1	mitochondrial E3 ubiquitin protein ligase 1 [Source:HGNC Symbol;Acc:HGNC:25762]
ENSG00000090530	0.890152461489222	7.22931630123033e-16	P3H2	prolyl 3-hydroxylase 2 [Source:HGNC Symbol;Acc:HGNC:19317]
ENSG00000090565	-0.730551541955354	9.39874594249338e-10	RAB11FIP3	RAB11 family interacting protein 3 [Source:HGNC Symbol;Acc:HGNC:17224]
ENSG00000090659	3.4824648202747	7.14340097090162e-34	CD209	CD209 molecule [Source:HGNC Symbol;Acc:HGNC:1641]
ENSG00000090674	0.555049060173159	9.82602884493661e-10	MCOLN1	mucolipin 1 [Source:HGNC Symbol;Acc:HGNC:13356]
ENSG00000090686	-0.449200456543355	9.13190823706419e-06	USP48	ubiquitin specific peptidase 48 [Source:HGNC Symbol;Acc:HGNC:18533]
ENSG00000090776	-0.638842963832029	0.000186699590334042	EFNB1	ephrin B1 [Source:HGNC Symbol;Acc:HGNC:3226]
ENSG00000090857	0.574848969586507	4.0898705065815e-05	PDPR	pyruvate dehydrogenase phosphatase regulatory subunit [Source:HGNC Symbol;Acc:HGNC:30264]
ENSG00000090861	1.12869860343894	7.3576189903642e-09	AARS	alanyl-tRNA synthetase [Source:HGNC Symbol;Acc:HGNC:20]
ENSG00000090889	-0.991431608646772	7.53378259803925e-33	KIF4A	kinesin family member 4A [Source:HGNC Symbol;Acc:HGNC:13339]
ENSG00000090924	-0.816776290678336	4.90656309282977e-09	PLEKHG2	pleckstrin homology and RhoGEF domain containing G2 [Source:HGNC Symbol;Acc:HGNC:29515]
ENSG00000090975	-1.66571763900594	1.3079429037034e-19	PITPNM2	phosphatidylinositol transfer protein membrane associated 2 [Source:HGNC Symbol;Acc:HGNC:21044]
ENSG00000091129	2.41223996766259	2.42161745685695e-31	NRCAM	neuronal cell adhesion molecule [Source:HGNC Symbol;Acc:HGNC:7994]
ENSG00000091317	-0.476974851053165	2.58335122316819e-11	CMTM6	CKLF like MARVEL transmembrane domain containing 6 [Source:HGNC Symbol;Acc:HGNC:19177]
ENSG00000091409	-1.15056164603845	5.79492726861022e-22	ITGA6	integrin subunit alpha 6 [Source:HGNC Symbol;Acc:HGNC:6142]
ENSG00000091428	2.36178571349971	1.12035972815147e-05	RAPGEF4	Rap guanine nucleotide exchange factor 4 [Source:HGNC Symbol;Acc:HGNC:16626]
ENSG00000091490	0.482105424276747	0.000226226629816721	SEL1L3	SEL1L family member 3 [Source:HGNC Symbol;Acc:HGNC:29108]
ENSG00000091536	1.38827395806396	8.49260869034427e-05	MYO15A	myosin XVA [Source:HGNC Symbol;Acc:HGNC:7594]
ENSG00000091542	-0.586199651737719	4.49202281180117e-14	ALKBH5	alkB homolog 5, RNA demethylase [Source:HGNC Symbol;Acc:HGNC:25996]
ENSG00000091651	-0.373111541121146	1.49878849451541e-05	ORC6	origin recognition complex subunit 6 [Source:HGNC Symbol;Acc:HGNC:17151]
ENSG00000091732	-0.504152435108965	0.00081417900762083	ZC3HC1	zinc finger C3HC-type containing 1 [Source:HGNC Symbol;Acc:HGNC:29913]
ENSG00000091986	1.21582433285711	2.25552883128753e-10	CCDC80	coiled-coil domain containing 80 [Source:HGNC Symbol;Acc:HGNC:30649]
ENSG00000092036	-0.902970230040865	1.87605094362503e-19	HAUS4	HAUS augmin like complex subunit 4 [Source:HGNC Symbol;Acc:HGNC:20163]
ENSG00000092094	-0.742653996518576	2.67543754581905e-12	OSGEP	O-sialoglycoprotein endopeptidase [Source:HGNC Symbol;Acc:HGNC:18028]
ENSG00000092098	-0.547206959123493	0.000414311048776185	RNF31	ring finger protein 31 [Source:HGNC Symbol;Acc:HGNC:16031]
ENSG00000092140	-0.977356098344189	6.11929524787841e-20	G2E3	G2/M-phase specific E3 ubiquitin protein ligase [Source:HGNC Symbol;Acc:HGNC:20338]
ENSG00000092148	-0.582690462697369	8.06256263868936e-09	HECTD1	HECT domain E3 ubiquitin protein ligase 1 [Source:HGNC Symbol;Acc:HGNC:20157]
ENSG00000092201	-0.854931374510792	7.10735703541112e-21	SUPT16H	SPT16 homolog, facilitates chromatin remodeling subunit [Source:HGNC Symbol;Acc:HGNC:11465]
ENSG00000092203	-0.810510567490062	3.07048289086222e-10	TOX4	TOX high mobility group box family member 4 [Source:HGNC Symbol;Acc:HGNC:20161]
ENSG00000092330	-0.451980836138664	9.02775001892688e-11	TINF2	TERF1 interacting nuclear factor 2 [Source:HGNC Symbol;Acc:HGNC:11824]
ENSG00000092421	-4.72391776602547	2.85750063832825e-62	SEMA6A	semaphorin 6A [Source:HGNC Symbol;Acc:HGNC:10738]
ENSG00000092470	-1.06391429373821	3.66232978108331e-15	WDR76	WD repeat domain 76 [Source:HGNC Symbol;Acc:HGNC:25773]
ENSG00000092607	0.970013299626077	5.55097449796759e-19	TBX15	T-box transcription factor 15 [Source:HGNC Symbol;Acc:HGNC:11594]
ENSG00000092820	-1.0816691464615	6.36689533161321e-14	EZR	ezrin [Source:HGNC Symbol;Acc:HGNC:12691]
ENSG00000092841	-0.609450549771945	5.13403848036506e-21	MYL6	myosin light chain 6 [Source:HGNC Symbol;Acc:HGNC:7587]
ENSG00000092847	-0.524568699895123	1.10862297575342e-09	AGO1	argonaute RISC component 1 [Source:HGNC Symbol;Acc:HGNC:3262]
ENSG00000092853	-1.077987387643	4.21770394502525e-09	CLSPN	claspin [Source:HGNC Symbol;Acc:HGNC:19715]
ENSG00000092929	1.75459042087749	0.00049139334134594	UNC13D	unc-13 homolog D [Source:HGNC Symbol;Acc:HGNC:23147]
ENSG00000092931	0.538636616651308	6.21440128568438e-07	MFSD11	major facilitator superfamily domain containing 11 [Source:HGNC Symbol;Acc:HGNC:25458]
ENSG00000092964	-1.04374250032212	2.68164805059609e-16	DPYSL2	dihydropyrimidinase like 2 [Source:HGNC Symbol;Acc:HGNC:3014]
ENSG00000092978	0.683696364772735	1.7692842860098e-08	GPATCH2	G-patch domain containing 2 [Source:HGNC Symbol;Acc:HGNC:25499]
ENSG00000093009	-0.367495171074956	3.37047165563457e-06	CDC45	cell division cycle 45 [Source:HGNC Symbol;Acc:HGNC:1739]
ENSG00000093167	-0.590472378565427	1.00115349146183e-08	LRRFIP2	LRR binding FLII interacting protein 2 [Source:HGNC Symbol;Acc:HGNC:6703]
ENSG00000093183	-0.587298397711757	9.32747293789941e-15	SEC22C	SEC22 homolog C, vesicle trafficking protein [Source:HGNC Symbol;Acc:HGNC:16828]
ENSG00000093217	-0.947214773734994	1.47160220524242e-11	XYLB	xylulokinase [Source:HGNC Symbol;Acc:HGNC:12839]
ENSG00000094631	-0.688284287254056	6.66156114526731e-09	HDAC6	histone deacetylase 6 [Source:HGNC Symbol;Acc:HGNC:14064]
ENSG00000094804	-0.776396738242905	4.92343648769012e-08	CDC6	cell division cycle 6 [Source:HGNC Symbol;Acc:HGNC:1744]
ENSG00000094916	-0.615257507871218	2.83183704688263e-10	CBX5	chromobox 5 [Source:HGNC Symbol;Acc:HGNC:1555]
ENSG00000095002	-0.653575300158503	1.3304681618159e-09	MSH2	mutS homolog 2 [Source:HGNC Symbol;Acc:HGNC:7325]
ENSG00000095303	-2.56060848071581	1.41866202575059e-22	PTGS1	prostaglandin-endoperoxide synthase 1 [Source:HGNC Symbol;Acc:HGNC:9604]
ENSG00000095319	-0.455387949010943	6.63017274664719e-06	NUP188	nucleoporin 188 [Source:HGNC Symbol;Acc:HGNC:17859]
ENSG00000095321	-0.669108713582303	0.000343949166767028	CRAT	carnitine O-acetyltransferase [Source:HGNC Symbol;Acc:HGNC:2342]
ENSG00000095370	3.73607887735958	4.7990111312944e-05	SH2D3C	SH2 domain containing 3C [Source:HGNC Symbol;Acc:HGNC:16884]
ENSG00000095383	-0.427135036899868	1.55087388054801e-06	TBC1D2	TBC1 domain family member 2 [Source:HGNC Symbol;Acc:HGNC:18026]
ENSG00000095397	1.21411045810601	4.8342063057274e-08	WHRN	whirlin [Source:HGNC Symbol;Acc:HGNC:16361]
ENSG00000095587	0.34979440280601	9.9043593779165e-06	TLL2	tolloid like 2 [Source:HGNC Symbol;Acc:HGNC:11844]
ENSG00000095637	-3.80502098033217	1.35925535144137e-34	SORBS1	sorbin and SH3 domain containing 1 [Source:HGNC Symbol;Acc:HGNC:14565]
ENSG00000095951	0.655954061973943	5.02895530740125e-05	HIVEP1	human immunodeficiency virus type I enhancer binding protein 1 [Source:HGNC Symbol;Acc:HGNC:4920]
ENSG00000096060	-0.668280642751765	1.00325969911769e-14	FKBP5	FKBP prolyl isomerase 5 [Source:HGNC Symbol;Acc:HGNC:3721]
ENSG00000096092	-0.763991904888212	1.05333276002638e-07	TMEM14A	transmembrane protein 14A [Source:HGNC Symbol;Acc:HGNC:21076]
ENSG00000096384	-0.772787394835235	7.94495790323394e-26	HSP90AB1	heat shock protein 90 alpha family class B member 1 [Source:HGNC Symbol;Acc:HGNC:5258]
ENSG00000096401	-0.449397694917767	2.41074085512493e-10	CDC5L	cell division cycle 5 like [Source:HGNC Symbol;Acc:HGNC:1743]
ENSG00000096433	-1.00065226247275	2.92994314199933e-10	ITPR3	inositol 1,4,5-trisphosphate receptor type 3 [Source:HGNC Symbol;Acc:HGNC:6182]
ENSG00000097021	-0.413549175370253	5.40682106781342e-12	ACOT7	acyl-CoA thioesterase 7 [Source:HGNC Symbol;Acc:HGNC:24157]
ENSG00000097046	-0.5752059680889	1.51230261987274e-10	CDC7	cell division cycle 7 [Source:HGNC Symbol;Acc:HGNC:1745]
ENSG00000099139	-1.82594344452849	0.000236156996761584	PCSK5	proprotein convertase subtilisin/kexin type 5 [Source:HGNC Symbol;Acc:HGNC:8747]
ENSG00000099194	-0.967680589378227	6.64258939658735e-10	SCD	stearoyl-CoA desaturase [Source:HGNC Symbol;Acc:HGNC:10571]
ENSG00000099219	-1.1107961859569	3.34293101658901e-41	ERMP1	endoplasmic reticulum metallopeptidase 1 [Source:HGNC Symbol;Acc:HGNC:23703]
ENSG00000099256	3.30272566586578	0.000127702354838656	PRTFDC1	phosphoribosyl transferase domain containing 1 [Source:HGNC Symbol;Acc:HGNC:23333]
ENSG00000099331	-0.579264569301348	2.12951138214176e-09	MYO9B	myosin IXB [Source:HGNC Symbol;Acc:HGNC:7609]
ENSG00000099338	1.39007798127335	0.000921397827263298	CATSPERG	cation channel sperm associated auxiliary subunit gamma [Source:HGNC Symbol;Acc:HGNC:25243]
ENSG00000099364	-0.489291145225844	0.000170254352752892	FBXL19	F-box and leucine rich repeat protein 19 [Source:HGNC Symbol;Acc:HGNC:25300]
ENSG00000099365	1.37522830890007	7.36921689607835e-08	STX1B	syntaxin 1B [Source:HGNC Symbol;Acc:HGNC:18539]
ENSG00000099377	-1.97377367199818	2.70678209295595e-05	HSD3B7	hydroxy-delta-5-steroid dehydrogenase, 3 beta- and steroid delta-isomerase 7 [Source:HGNC Symbol;Acc:HGNC:18324]
ENSG00000099381	-0.321661332257651	8.33886858619572e-05	SETD1A	SET domain containing 1A, histone lysine methyltransferase [Source:HGNC Symbol;Acc:HGNC:29010]
ENSG00000099385	-0.691736968509236	8.0924327270881e-08	BCL7C	BAF chromatin remodeling complex subunit BCL7C [Source:HGNC Symbol;Acc:HGNC:1006]
ENSG00000099810	-0.468480253861482	5.20630107511246e-12	MTAP	methylthioadenosine phosphorylase [Source:HGNC Symbol;Acc:HGNC:7413]
ENSG00000099812	2.88603279375018	5.67430709674477e-16	MISP	mitotic spindle positioning [Source:HGNC Symbol;Acc:HGNC:27000]
ENSG00000099814	-0.827163593946922	3.52267780240622e-38	CEP170B	centrosomal protein 170B [Source:HGNC Symbol;Acc:HGNC:20362]
ENSG00000099817	-0.30430748974687	1.1778222633412e-06	POLR2E	RNA polymerase II subunit E [Source:HGNC Symbol;Acc:HGNC:9192]
ENSG00000099821	-0.353276598318004	3.11098099168203e-06	POLRMT	RNA polymerase mitochondrial [Source:HGNC Symbol;Acc:HGNC:9200]
ENSG00000099849	-1.72368111740745	7.29150132164353e-20	RASSF7	Ras association domain family member 7 [Source:HGNC Symbol;Acc:HGNC:1166]
ENSG00000099889	-0.940823288355396	1.81630535205558e-09	ARVCF	ARVCF delta catenin family member [Source:HGNC Symbol;Acc:HGNC:728]
ENSG00000099901	-0.416215119591099	2.73803842404886e-07	RANBP1	RAN binding protein 1 [Source:HGNC Symbol;Acc:HGNC:9847]
ENSG00000099904	-0.912552806537232	1.75475136267926e-19	ZDHHC8	zinc finger DHHC-type containing 8 [Source:HGNC Symbol;Acc:HGNC:18474]
ENSG00000099917	-0.428540696951699	8.20502254811362e-07	MED15	mediator complex subunit 15 [Source:HGNC Symbol;Acc:HGNC:14248]
ENSG00000099954	4.29251319716223	7.44675455491114e-09	CECR2	CECR2 histone acetyl-lysine reader [Source:HGNC Symbol;Acc:HGNC:1840]
ENSG00000099956	-0.310282543523266	4.45301962431218e-05	SMARCB1	SWI/SNF related, matrix associated, actin dependent regulator of chromatin, subfamily b, member 1 [Source:HGNC Symbol;Acc:HGNC:11103]
ENSG00000099957	2.59374267129684	1.31551164180141e-11	P2RX6	purinergic receptor P2X 6 [Source:HGNC Symbol;Acc:HGNC:8538]
ENSG00000099968	0.951605698398402	2.98969817142614e-48	BCL2L13	BCL2 like 13 [Source:HGNC Symbol;Acc:HGNC:17164]
ENSG00000099998	1.48183426819503	2.73319868779096e-06	GGT5	gamma-glutamyltransferase 5 [Source:HGNC Symbol;Acc:HGNC:4260]
ENSG00000100027	-0.745068315388275	5.907888652468e-05	YPEL1	yippee like 1 [Source:HGNC Symbol;Acc:HGNC:12845]
ENSG00000100030	-0.319744196376091	4.65493467491745e-05	MAPK1	mitogen-activated protein kinase 1 [Source:HGNC Symbol;Acc:HGNC:6871]
ENSG00000100031	0.404692590653256	0.000141460913986586	GGT1	gamma-glutamyltransferase 1 [Source:HGNC Symbol;Acc:HGNC:4250]
ENSG00000100033	-1.69453441997415	2.42848267003925e-08	PRODH	proline dehydrogenase 1 [Source:HGNC Symbol;Acc:HGNC:9453]
ENSG00000100034	-0.477568422324392	0.000163880082486201	PPM1F	protein phosphatase, Mg2+/Mn2+ dependent 1F [Source:HGNC Symbol;Acc:HGNC:19388]
ENSG00000100036	-0.88260500207272	1.18898084450869e-06	SLC35E4	solute carrier family 35 member E4 [Source:HGNC Symbol;Acc:HGNC:17058]
ENSG00000100058	0.532794235175592	3.16011077234309e-05	CRYBB2P1	crystallin beta B2 pseudogene 1 [Source:HGNC Symbol;Acc:HGNC:2399]
ENSG00000100065	-1.43384589787138	3.56225462980015e-08	CARD10	caspase recruitment domain family member 10 [Source:HGNC Symbol;Acc:HGNC:16422]
ENSG00000100068	1.14430873029977	7.79874586569397e-06	LRP5L	LDL receptor related protein 5 like [Source:HGNC Symbol;Acc:HGNC:25323]
ENSG00000100077	2.49266452599202	4.84982130640828e-12	GRK3	G protein-coupled receptor kinase 3 [Source:HGNC Symbol;Acc:HGNC:290]
ENSG00000100079	-1.86044158668622	5.75685489865609e-06	LGALS2	galectin 2 [Source:HGNC Symbol;Acc:HGNC:6562]
ENSG00000100083	0.347220286643132	3.71389177748071e-07	GGA1	golgi associated, gamma adaptin ear containing, ARF binding protein 1 [Source:HGNC Symbol;Acc:HGNC:17842]
ENSG00000100097	-0.625504942932182	3.11286990712671e-09	LGALS1	galectin 1 [Source:HGNC Symbol;Acc:HGNC:6561]
ENSG00000100100	2.33606360070202	1.94331005189624e-21	PIK3IP1	phosphoinositide-3-kinase interacting protein 1 [Source:HGNC Symbol;Acc:HGNC:24942]
ENSG00000100106	-0.570915370388969	3.26089759564399e-09	TRIOBP	TRIO and F-actin binding protein [Source:HGNC Symbol;Acc:HGNC:17009]
ENSG00000100151	4.26348178886645	2.24427326480411e-17	PICK1	protein interacting with PRKCA 1 [Source:HGNC Symbol;Acc:HGNC:9394]
ENSG00000100154	0.678411207340673	1.58873161067041e-06	TTC28	tetratricopeptide repeat domain 28 [Source:HGNC Symbol;Acc:HGNC:29179]
ENSG00000100162	-0.410050150685357	1.68245483468263e-05	CENPM	centromere protein M [Source:HGNC Symbol;Acc:HGNC:18352]
ENSG00000100219	1.25253968865601	1.12554013370693e-18	XBP1	X-box binding protein 1 [Source:HGNC Symbol;Acc:HGNC:12801]
ENSG00000100226	0.510286026077011	3.00377225342731e-05	GTPBP1	GTP binding protein 1 [Source:HGNC Symbol;Acc:HGNC:4669]
ENSG00000100241	-0.474881709548151	3.79063296279469e-06	SBF1	SET binding factor 1 [Source:HGNC Symbol;Acc:HGNC:10542]
ENSG00000100242	-0.934453484006822	1.86094326564753e-29	SUN2	Sad1 and UNC84 domain containing 2 [Source:HGNC Symbol;Acc:HGNC:14210]
ENSG00000100243	-0.395212704520536	0.000309862798962173	CYB5R3	cytochrome b5 reductase 3 [Source:HGNC Symbol;Acc:HGNC:2873]
ENSG00000100246	0.385114662953862	0.000194901705825988	DNAL4	dynein axonemal light chain 4 [Source:HGNC Symbol;Acc:HGNC:2955]
ENSG00000100253	2.32996581602732	9.3697759180358e-31	MIOX	myo-inositol oxygenase [Source:HGNC Symbol;Acc:HGNC:14522]
ENSG00000100258	-0.533319965754	5.13215345495065e-06	LMF2	lipase maturation factor 2 [Source:HGNC Symbol;Acc:HGNC:25096]
ENSG00000100263	0.536982141576043	3.4917322190663e-06	RHBDD3	rhomboid domain containing 3 [Source:HGNC Symbol;Acc:HGNC:1308]
ENSG00000100281	-0.333635345565655	0.000422445494951277	HMGXB4	HMG-box containing 4 [Source:HGNC Symbol;Acc:HGNC:5003]
ENSG00000100284	1.05845692639657	3.61205974192599e-13	TOM1	target of myb1 membrane trafficking protein [Source:HGNC Symbol;Acc:HGNC:11982]
ENSG00000100285	4.4081352729797	0.000265888915647484	NEFH	neurofilament heavy [Source:HGNC Symbol;Acc:HGNC:7737]
ENSG00000100292	1.41988656605288	8.02787560478409e-11	HMOX1	heme oxygenase 1 [Source:HGNC Symbol;Acc:HGNC:5013]
ENSG00000100294	-0.368660779409488	0.000472705621228851	MCAT	malonyl-CoA-acyl carrier protein transacylase [Source:HGNC Symbol;Acc:HGNC:29622]
ENSG00000100297	-0.81230167164239	5.87378638585185e-10	MCM5	minichromosome maintenance complex component 5 [Source:HGNC Symbol;Acc:HGNC:6948]
ENSG00000100298	3.51867671292002	5.55288270596226e-08	APOBEC3H	apolipoprotein B mRNA editing enzyme catalytic subunit 3H [Source:HGNC Symbol;Acc:HGNC:24100]
ENSG00000100302	0.904338572440027	0.000370576483554113	RASD2	RASD family member 2 [Source:HGNC Symbol;Acc:HGNC:18229]
ENSG00000100311	-6.03866561044341	3.01827748432614e-19	PDGFB	platelet derived growth factor subunit B [Source:HGNC Symbol;Acc:HGNC:8800]
ENSG00000100324	-0.417027674384037	8.59783653823925e-06	TAB1	TGF-beta activated kinase 1 (MAP3K7) binding protein 1 [Source:HGNC Symbol;Acc:HGNC:18157]
ENSG00000100336	-1.95889008522017	3.01827748432614e-19	APOL4	apolipoprotein L4 [Source:HGNC Symbol;Acc:HGNC:14867]
ENSG00000100342	-2.70039302396024	5.4298505555813e-32	APOL1	apolipoprotein L1 [Source:HGNC Symbol;Acc:HGNC:618]
ENSG00000100345	-1.21125610198567	1.46145860204806e-69	MYH9	myosin heavy chain 9 [Source:HGNC Symbol;Acc:HGNC:7579]
ENSG00000100350	4.41896730749711	2.54523010799679e-103	FOXRED2	FAD dependent oxidoreductase domain containing 2 [Source:HGNC Symbol;Acc:HGNC:26264]
ENSG00000100360	0.905014661360591	3.57755727767654e-16	IFT27	intraflagellar transport 27 [Source:HGNC Symbol;Acc:HGNC:18626]
ENSG00000100368	2.16873786782707	2.85982296823929e-07	CSF2RB	colony stimulating factor 2 receptor beta common subunit [Source:HGNC Symbol;Acc:HGNC:2436]
ENSG00000100376	0.586958964718694	0.000133205335126518	FAM118A	family with sequence similarity 118 member A [Source:HGNC Symbol;Acc:HGNC:1313]
ENSG00000100379	-0.467631980837811	7.07364915344732e-08	KCTD17	potassium channel tetramerization domain containing 17 [Source:HGNC Symbol;Acc:HGNC:25705]
ENSG00000100413	-0.200441853271332	0.000598290324612701	POLR3H	RNA polymerase III subunit H [Source:HGNC Symbol;Acc:HGNC:30349]
ENSG00000100416	-0.461964168067658	2.09352738223325e-14	TRMU	tRNA 5-methylaminomethyl-2-thiouridylate methyltransferase [Source:HGNC Symbol;Acc:HGNC:25481]
ENSG00000100418	0.99839285857731	7.77680764868514e-08	DESI1	desumoylating isopeptidase 1 [Source:HGNC Symbol;Acc:HGNC:24577]
ENSG00000100422	-1.14632616461245	4.74788551936055e-12	CERK	ceramide kinase [Source:HGNC Symbol;Acc:HGNC:19256]
ENSG00000100426	-0.481885104794503	1.63117903152467e-10	ZBED4	zinc finger BED-type containing 4 [Source:HGNC Symbol;Acc:HGNC:20721]
ENSG00000100441	-0.471879286879362	5.32825689367393e-10	KHNYN	KH and NYN domain containing [Source:HGNC Symbol;Acc:HGNC:20166]
ENSG00000100442	-0.570323130289823	4.63187442986641e-13	FKBP3	FKBP prolyl isomerase 3 [Source:HGNC Symbol;Acc:HGNC:3719]
ENSG00000100445	-0.506044818642111	2.5831409682151e-05	SDR39U1	short chain dehydrogenase/reductase family 39U member 1 [Source:HGNC Symbol;Acc:HGNC:20275]
ENSG00000100461	-0.976056534345833	1.56730210402491e-17	RBM23	RNA binding motif protein 23 [Source:HGNC Symbol;Acc:HGNC:20155]
ENSG00000100473	-2.82991255930638	3.55086120503661e-11	COCH	cochlin [Source:HGNC Symbol;Acc:HGNC:2180]
ENSG00000100479	-0.828677919522926	1.46010588605088e-10	POLE2	DNA polymerase epsilon 2, accessory subunit [Source:HGNC Symbol;Acc:HGNC:9178]
ENSG00000100490	-0.846097250573278	0.000491277819048342	CDKL1	cyclin dependent kinase like 1 [Source:HGNC Symbol;Acc:HGNC:1781]
ENSG00000100503	-1.09903741144931	1.12569847323986e-26	NIN	ninein [Source:HGNC Symbol;Acc:HGNC:14906]
ENSG00000100504	-0.870983930616403	3.65668935803578e-34	PYGL	glycogen phosphorylase L [Source:HGNC Symbol;Acc:HGNC:9725]
ENSG00000100505	-1.05241456441934	3.82409392190488e-05	TRIM9	tripartite motif containing 9 [Source:HGNC Symbol;Acc:HGNC:16288]
ENSG00000100526	-1.33182864664688	5.50549194574983e-19	CDKN3	cyclin dependent kinase inhibitor 3 [Source:HGNC Symbol;Acc:HGNC:1791]
ENSG00000100558	-0.777716092918155	3.7136109158088e-14	PLEK2	pleckstrin 2 [Source:HGNC Symbol;Acc:HGNC:19238]
ENSG00000100567	-0.349847951714404	1.06636791141921e-05	PSMA3	proteasome subunit alpha 3 [Source:HGNC Symbol;Acc:HGNC:9532]
ENSG00000100568	-0.807943280693383	1.16643402952872e-26	VTI1B	vesicle transport through interaction with t-SNAREs 1B [Source:HGNC Symbol;Acc:HGNC:17793]
ENSG00000100577	0.284991160453097	0.000234715028376703	GSTZ1	glutathione S-transferase zeta 1 [Source:HGNC Symbol;Acc:HGNC:4643]
ENSG00000100580	-0.592051071164271	6.94539448719894e-07	TMED8	transmembrane p24 trafficking protein family member 8 [Source:HGNC Symbol;Acc:HGNC:18633]
ENSG00000100591	-0.751182893394977	1.86620750748431e-18	AHSA1	activator of HSP90 ATPase activity 1 [Source:HGNC Symbol;Acc:HGNC:1189]
ENSG00000100592	-0.895873889212372	1.14542764022917e-07	DAAM1	dishevelled associated activator of morphogenesis 1 [Source:HGNC Symbol;Acc:HGNC:18142]
ENSG00000100596	-1.01805003312519	8.12289693544479e-20	SPTLC2	serine palmitoyltransferase long chain base subunit 2 [Source:HGNC Symbol;Acc:HGNC:11278]
ENSG00000100599	-0.98812939029128	6.28618155044227e-23	RIN3	Ras and Rab interactor 3 [Source:HGNC Symbol;Acc:HGNC:18751]
ENSG00000100601	-0.393564589418552	0.000203130608996324	ALKBH1	alkB homolog 1, histone H2A dioxygenase [Source:HGNC Symbol;Acc:HGNC:17911]
ENSG00000100603	-0.434307800397196	6.47596206500172e-10	SNW1	SNW domain containing 1 [Source:HGNC Symbol;Acc:HGNC:16696]
ENSG00000100605	-1.2177511967322	1.56534713616288e-28	ITPK1	inositol-tetrakisphosphate 1-kinase [Source:HGNC Symbol;Acc:HGNC:6177]
ENSG00000100626	1.98078480895302	0.000835013633200419	GALNT16	polypeptide N-acetylgalactosaminyltransferase 16 [Source:HGNC Symbol;Acc:HGNC:23233]
ENSG00000100629	-0.751519089296681	2.04299308657905e-06	CEP128	centrosomal protein 128 [Source:HGNC Symbol;Acc:HGNC:20359]
ENSG00000100632	-0.697626381052059	5.18385597408507e-23	ERH	ERH mRNA splicing and mitosis factor [Source:HGNC Symbol;Acc:HGNC:3447]
ENSG00000100650	-0.351344097912667	8.5895908612147e-05	SRSF5	serine and arginine rich splicing factor 5 [Source:HGNC Symbol;Acc:HGNC:10787]
ENSG00000100697	-0.659560083827787	0.00010637007170004	DICER1	dicer 1, ribonuclease III [Source:HGNC Symbol;Acc:HGNC:17098]
ENSG00000100711	-1.29829604893727	1.06510390244595e-32	ZFYVE21	zinc finger FYVE-type containing 21 [Source:HGNC Symbol;Acc:HGNC:20760]
ENSG00000100714	-0.571065691853257	1.29802960463805e-10	MTHFD1	methylenetetrahydrofolate dehydrogenase, cyclohydrolase and formyltetrahydrofolate synthetase 1 [Source:HGNC Symbol;Acc:HGNC:7432]
ENSG00000100722	-0.468645117998788	1.9721063253274e-05	ZC3H14	zinc finger CCCH-type containing 14 [Source:HGNC Symbol;Acc:HGNC:20509]
ENSG00000100726	-1.02897338296029	1.18855249735325e-21	TELO2	telomere maintenance 2 [Source:HGNC Symbol;Acc:HGNC:29099]
ENSG00000100731	-0.688849079579604	3.43978137764522e-07	PCNX1	pecanex 1 [Source:HGNC Symbol;Acc:HGNC:19740]
ENSG00000100749	-0.532892337356254	4.49703486333472e-05	VRK1	VRK serine/threonine kinase 1 [Source:HGNC Symbol;Acc:HGNC:12718]
ENSG00000100764	-0.499930752839953	1.78434841233881e-09	PSMC1	proteasome 26S subunit, ATPase 1 [Source:HGNC Symbol;Acc:HGNC:9547]
ENSG00000100784	-0.68867218490003	8.69074838653315e-08	RPS6KA5	ribosomal protein S6 kinase A5 [Source:HGNC Symbol;Acc:HGNC:10434]
ENSG00000100802	-0.699016926847976	6.56240437507284e-07	C14orf93	chromosome 14 open reading frame 93 [Source:HGNC Symbol;Acc:HGNC:20162]
ENSG00000100811	-0.562577006728817	1.59034886698118e-17	YY1	YY1 transcription factor [Source:HGNC Symbol;Acc:HGNC:12856]
ENSG00000100813	-0.400793564081117	2.96469635622339e-06	ACIN1	apoptotic chromatin condensation inducer 1 [Source:HGNC Symbol;Acc:HGNC:17066]
ENSG00000100823	-0.790185378444127	5.45622730225637e-42	APEX1	apurinic/apyrimidinic endodeoxyribonuclease 1 [Source:HGNC Symbol;Acc:HGNC:587]
ENSG00000100836	-0.832611820833452	3.40454284278179e-13	PABPN1	poly(A) binding protein nuclear 1 [Source:HGNC Symbol;Acc:HGNC:8565]
ENSG00000100852	-0.681478846374807	1.01191554752747e-07	ARHGAP5	Rho GTPase activating protein 5 [Source:HGNC Symbol;Acc:HGNC:675]
ENSG00000100865	-0.437575723872789	3.78443719064942e-06	CINP	cyclin dependent kinase 2 interacting protein [Source:HGNC Symbol;Acc:HGNC:23789]
ENSG00000100883	-0.488717915497425	7.44713207946657e-10	SRP54	signal recognition particle 54 [Source:HGNC Symbol;Acc:HGNC:11301]
ENSG00000100888	-0.89301611616968	1.83290089217278e-15	CHD8	chromodomain helicase DNA binding protein 8 [Source:HGNC Symbol;Acc:HGNC:20153]
ENSG00000100890	-0.719766595400819	2.93936313513706e-15	PRORP	protein only RNase P catalytic subunit [Source:HGNC Symbol;Acc:HGNC:19958]
ENSG00000100897	-0.571561652228745	1.21177690305065e-06	DCAF11	DDB1 and CUL4 associated factor 11 [Source:HGNC Symbol;Acc:HGNC:20258]
ENSG00000100902	-0.333957951675435	1.82992608087249e-05	PSMA6	proteasome subunit alpha 6 [Source:HGNC Symbol;Acc:HGNC:9535]
ENSG00000100908	-0.768235196420295	1.37960836755554e-12	EMC9	ER membrane protein complex subunit 9 [Source:HGNC Symbol;Acc:HGNC:20273]
ENSG00000100916	-1.04656726297323	3.14256546804186e-10	BRMS1L	BRMS1 like transcriptional repressor [Source:HGNC Symbol;Acc:HGNC:20512]
ENSG00000100926	-0.604303423093176	3.71463446247326e-13	TM9SF1	transmembrane 9 superfamily member 1 [Source:HGNC Symbol;Acc:HGNC:11864]
ENSG00000100934	-1.01540664720657	9.96177052843884e-33	SEC23A	Sec23 homolog A, coat complex II component [Source:HGNC Symbol;Acc:HGNC:10701]
ENSG00000100941	-0.412070010107567	7.9345442405993e-05	PNN	pinin, desmosome associated protein [Source:HGNC Symbol;Acc:HGNC:9162]
ENSG00000100979	1.63418089618258	4.29811383323197e-07	PLTP	phospholipid transfer protein [Source:HGNC Symbol;Acc:HGNC:9093]
ENSG00000100982	-0.841044448968836	7.29189421937628e-10	PCIF1	PDX1 C-terminal inhibiting factor 1 [Source:HGNC Symbol;Acc:HGNC:16200]
ENSG00000100994	0.748864962949247	5.23221538630541e-09	PYGB	glycogen phosphorylase B [Source:HGNC Symbol;Acc:HGNC:9723]
ENSG00000100997	-0.691000045695055	1.6405574503546e-10	ABHD12	abhydrolase domain containing 12 [Source:HGNC Symbol;Acc:HGNC:15868]
ENSG00000101003	-1.20335604756603	2.15864482845825e-33	GINS1	GINS complex subunit 1 [Source:HGNC Symbol;Acc:HGNC:28980]
ENSG00000101017	-0.528221644090299	6.21488995301045e-05	CD40	CD40 molecule [Source:HGNC Symbol;Acc:HGNC:11919]
ENSG00000101057	-0.895618829999142	4.50496527518261e-35	MYBL2	MYB proto-oncogene like 2 [Source:HGNC Symbol;Acc:HGNC:7548]
ENSG00000101096	0.944846823885665	0.000746196274559224	NFATC2	nuclear factor of activated T cells 2 [Source:HGNC Symbol;Acc:HGNC:7776]
ENSG00000101098	5.02358315637522	5.31544598929263e-07	RIMS4	regulating synaptic membrane exocytosis 4 [Source:HGNC Symbol;Acc:HGNC:16183]
ENSG00000101104	1.54996944091162	6.82151053284315e-07	PABPC1L	poly(A) binding protein cytoplasmic 1 like [Source:HGNC Symbol;Acc:HGNC:15797]
ENSG00000101150	-0.402309512462326	1.30005276504781e-13	TPD52L2	TPD52 like 2 [Source:HGNC Symbol;Acc:HGNC:12007]
ENSG00000101152	-0.224888779711354	0.000836044135834102	DNAJC5	DnaJ heat shock protein family (Hsp40) member C5 [Source:HGNC Symbol;Acc:HGNC:16235]
ENSG00000101160	-0.517533292157397	1.36014241964952e-16	CTSZ	cathepsin Z [Source:HGNC Symbol;Acc:HGNC:2547]
ENSG00000101161	-0.349597633990583	3.16682050602327e-10	PRPF6	pre-mRNA processing factor 6 [Source:HGNC Symbol;Acc:HGNC:15860]
ENSG00000101182	-0.381783843040655	1.25004890304365e-06	PSMA7	proteasome subunit alpha 7 [Source:HGNC Symbol;Acc:HGNC:9536]
ENSG00000101187	-1.74836946668145	1.21905392235914e-14	SLCO4A1	solute carrier organic anion transporter family member 4A1 [Source:HGNC Symbol;Acc:HGNC:10953]
ENSG00000101189	-0.728152085144357	9.60822544057211e-25	MRGBP	MRG domain binding protein [Source:HGNC Symbol;Acc:HGNC:15866]
ENSG00000101190	-0.481631281516519	1.15752824045643e-07	TCFL5	transcription factor like 5 [Source:HGNC Symbol;Acc:HGNC:11646]
ENSG00000101191	-0.782792532218466	9.73471072196681e-28	DIDO1	death inducer-obliterator 1 [Source:HGNC Symbol;Acc:HGNC:2680]
ENSG00000101193	-0.615516190428924	3.90498567730426e-25	GID8	GID complex subunit 8 homolog [Source:HGNC Symbol;Acc:HGNC:15857]
ENSG00000101194	-0.892002898755221	3.58774105846065e-17	SLC17A9	solute carrier family 17 member 9 [Source:HGNC Symbol;Acc:HGNC:16192]
ENSG00000101216	-0.513548357938698	2.06104643699723e-17	GMEB2	glucocorticoid modulatory element binding protein 2 [Source:HGNC Symbol;Acc:HGNC:4371]
ENSG00000101220	-0.553834014078759	2.52704223039227e-08	C20orf27	chromosome 20 open reading frame 27 [Source:HGNC Symbol;Acc:HGNC:15873]
ENSG00000101224	-1.07512052427998	1.10677398293359e-33	CDC25B	cell division cycle 25B [Source:HGNC Symbol;Acc:HGNC:1726]
ENSG00000101236	-1.08711449931535	7.57468153498173e-10	RNF24	ring finger protein 24 [Source:HGNC Symbol;Acc:HGNC:13779]
ENSG00000101246	-0.837499273168719	2.01132070027979e-12	ARFRP1	ADP ribosylation factor related protein 1 [Source:HGNC Symbol;Acc:HGNC:662]
ENSG00000101265	-1.1736147451194	1.26065139411048e-11	RASSF2	Ras association domain family member 2 [Source:HGNC Symbol;Acc:HGNC:9883]
ENSG00000101290	-0.614697579764106	2.07710382333875e-10	CDS2	CDP-diacylglycerol synthase 2 [Source:HGNC Symbol;Acc:HGNC:1801]
ENSG00000101310	0.570025129631826	1.93603314137739e-06	SEC23B	SEC23 homolog B, coat complex II component [Source:HGNC Symbol;Acc:HGNC:10702]
ENSG00000101335	-0.4600580066731	1.92479037883715e-10	MYL9	myosin light chain 9 [Source:HGNC Symbol;Acc:HGNC:15754]
ENSG00000101346	-0.559442713060111	5.74576653507039e-10	POFUT1	protein O-fucosyltransferase 1 [Source:HGNC Symbol;Acc:HGNC:14988]
ENSG00000101349	3.83796034353775	0.000282097967600761	PAK5	p21 (RAC1) activated kinase 5 [Source:HGNC Symbol;Acc:HGNC:15916]
ENSG00000101361	-0.364489696924177	0.000792923600150917	NOP56	NOP56 ribonucleoprotein [Source:HGNC Symbol;Acc:HGNC:15911]
ENSG00000101363	-0.213646131081237	0.000779348096769658	MANBAL	mannosidase beta like [Source:HGNC Symbol;Acc:HGNC:15799]
ENSG00000101367	-0.350542047489002	9.99948821208119e-06	MAPRE1	microtubule associated protein RP/EB family member 1 [Source:HGNC Symbol;Acc:HGNC:6890]
ENSG00000101384	1.47041777216837	1.10530315814237e-14	JAG1	jagged canonical Notch ligand 1 [Source:HGNC Symbol;Acc:HGNC:6188]
ENSG00000101400	-0.682977067194557	0.000631974764470383	SNTA1	syntrophin alpha 1 [Source:HGNC Symbol;Acc:HGNC:11167]
ENSG00000101407	-0.31970457483008	0.000304576155758166	TTI1	TELO2 interacting protein 1 [Source:HGNC Symbol;Acc:HGNC:29029]
ENSG00000101412	-1.06904212543793	4.97206886177912e-20	E2F1	E2F transcription factor 1 [Source:HGNC Symbol;Acc:HGNC:3113]
ENSG00000101442	-0.400343778925557	4.00704909719111e-06	ACTR5	actin related protein 5 [Source:HGNC Symbol;Acc:HGNC:14671]
ENSG00000101445	4.03981405643451	4.3583502458425e-05	PPP1R16B	protein phosphatase 1 regulatory subunit 16B [Source:HGNC Symbol;Acc:HGNC:15850]
ENSG00000101447	-0.935754828733298	1.96344698685125e-61	FAM83D	family with sequence similarity 83 member D [Source:HGNC Symbol;Acc:HGNC:16122]
ENSG00000101452	2.36406192241915	2.56389093315136e-92	DHX35	DEAH-box helicase 35 [Source:HGNC Symbol;Acc:HGNC:15861]
ENSG00000101473	-0.382349419940267	0.000866905543880313	ACOT8	acyl-CoA thioesterase 8 [Source:HGNC Symbol;Acc:HGNC:15919]
ENSG00000101474	-0.658757564714773	1.07160829502143e-23	APMAP	adipocyte plasma membrane associated protein [Source:HGNC Symbol;Acc:HGNC:13238]
ENSG00000101493	-0.80495264393541	1.16705423532197e-17	ZNF516	zinc finger protein 516 [Source:HGNC Symbol;Acc:HGNC:28990]
ENSG00000101546	-0.777385121861393	3.37221074182023e-24	RBFA	ribosome binding factor A [Source:HGNC Symbol;Acc:HGNC:26120]
ENSG00000101596	-0.4420383888063	0.000209749693493572	SMCHD1	structural maintenance of chromosomes flexible hinge domain containing 1 [Source:HGNC Symbol;Acc:HGNC:29090]
ENSG00000101639	-0.491846275398232	1.16564136263533e-08	CEP192	centrosomal protein 192 [Source:HGNC Symbol;Acc:HGNC:25515]
ENSG00000101670	3.01464262514186	2.95052353515925e-44	LIPG	lipase G, endothelial type [Source:HGNC Symbol;Acc:HGNC:6623]
ENSG00000101680	2.7203601619511	3.74892310347186e-11	LAMA1	laminin subunit alpha 1 [Source:HGNC Symbol;Acc:HGNC:6481]
ENSG00000101782	0.533984555394639	2.01544709240653e-05	RIOK3	RIO kinase 3 [Source:HGNC Symbol;Acc:HGNC:11451]
ENSG00000101811	-0.532485477678524	3.11137294443108e-09	CSTF2	cleavage stimulation factor subunit 2 [Source:HGNC Symbol;Acc:HGNC:2484]
ENSG00000101844	0.531684800554044	6.97068147403278e-08	ATG4A	autophagy related 4A cysteine peptidase [Source:HGNC Symbol;Acc:HGNC:16489]
ENSG00000101846	-0.917209570708675	3.0301583362528e-26	STS	steroid sulfatase [Source:HGNC Symbol;Acc:HGNC:11425]
ENSG00000101856	-0.491795922878328	4.79516394244396e-05	PGRMC1	progesterone receptor membrane component 1 [Source:HGNC Symbol;Acc:HGNC:16090]
ENSG00000101868	-0.63968252075303	7.63560703932414e-12	POLA1	DNA polymerase alpha 1, catalytic subunit [Source:HGNC Symbol;Acc:HGNC:9173]
ENSG00000101871	-0.826639288573476	1.79179258501909e-06	MID1	midline 1 [Source:HGNC Symbol;Acc:HGNC:7095]
ENSG00000101888	-0.474076719202964	9.69925411308507e-09	NXT2	nuclear transport factor 2 like export factor 2 [Source:HGNC Symbol;Acc:HGNC:18151]
ENSG00000101911	-0.92562114710846	1.15186353190162e-30	PRPS2	phosphoribosyl pyrophosphate synthetase 2 [Source:HGNC Symbol;Acc:HGNC:9465]
ENSG00000101938	4.32451172338868	1.4515927789922e-178	CHRDL1	chordin like 1 [Source:HGNC Symbol;Acc:HGNC:29861]
ENSG00000101945	-1.16617787381719	3.67293649039119e-19	SUV39H1	suppressor of variegation 3-9 homolog 1 [Source:HGNC Symbol;Acc:HGNC:11479]
ENSG00000101972	-0.376871047793505	1.47735893941722e-05	STAG2	stromal antigen 2 [Source:HGNC Symbol;Acc:HGNC:11355]
ENSG00000101974	-0.260893903338021	1.66279605425794e-05	ATP11C	ATPase phospholipid transporting 11C [Source:HGNC Symbol;Acc:HGNC:13554]
ENSG00000101977	3.23677438517721	0.000446812836953998	MCF2	MCF.2 cell line derived transforming sequence [Source:HGNC Symbol;Acc:HGNC:6940]
ENSG00000101986	0.802733555169808	3.12918227447736e-06	ABCD1	ATP binding cassette subfamily D member 1 [Source:HGNC Symbol;Acc:HGNC:61]
ENSG00000102007	-1.05666980909995	6.41177536996684e-25	PLP2	proteolipid protein 2 [Source:HGNC Symbol;Acc:HGNC:9087]
ENSG00000102034	-0.350454575993782	1.17417917673985e-05	ELF4	E74 like ETS transcription factor 4 [Source:HGNC Symbol;Acc:HGNC:3319]
ENSG00000102054	-0.522597748225249	9.15348388541715e-06	RBBP7	RB binding protein 7, chromatin remodeling factor [Source:HGNC Symbol;Acc:HGNC:9890]
ENSG00000102057	1.13987941208954	8.28647879270641e-05	KCND1	potassium voltage-gated channel subfamily D member 1 [Source:HGNC Symbol;Acc:HGNC:6237]
ENSG00000102096	-0.713832397846821	8.89557870035221e-06	PIM2	Pim-2 proto-oncogene, serine/threonine kinase [Source:HGNC Symbol;Acc:HGNC:8987]
ENSG00000102098	-1.30641197206085	7.68544665392378e-16	SCML2	Scm polycomb group protein like 2 [Source:HGNC Symbol;Acc:HGNC:10581]
ENSG00000102125	-0.389698247341569	0.000246276100356185	TAZ	tafazzin [Source:HGNC Symbol;Acc:HGNC:11577]
ENSG00000102144	-0.565711815898724	8.72959754706811e-12	PGK1	phosphoglycerate kinase 1 [Source:HGNC Symbol;Acc:HGNC:8896]
ENSG00000102158	-0.353596328163579	7.44846986296582e-05	MAGT1	magnesium transporter 1 [Source:HGNC Symbol;Acc:HGNC:28880]
ENSG00000102172	-0.794493301115885	1.54898486804059e-33	SMS	spermine synthase [Source:HGNC Symbol;Acc:HGNC:11123]
ENSG00000102174	-0.820072715776235	5.10887784110154e-05	PHEX	phosphate regulating endopeptidase homolog X-linked [Source:HGNC Symbol;Acc:HGNC:8918]
ENSG00000102178	-0.908443098979542	8.99164518655427e-17	UBL4A	ubiquitin like 4A [Source:HGNC Symbol;Acc:HGNC:12505]
ENSG00000102181	-0.889725731633157	1.0629773609883e-38	CD99L2	CD99 molecule like 2 [Source:HGNC Symbol;Acc:HGNC:18237]
ENSG00000102225	-0.518014207158898	4.95531049464521e-13	CDK16	cyclin dependent kinase 16 [Source:HGNC Symbol;Acc:HGNC:8749]
ENSG00000102226	-0.400008112562462	2.08647520597878e-06	USP11	ubiquitin specific peptidase 11 [Source:HGNC Symbol;Acc:HGNC:12609]
ENSG00000102265	0.471081257210083	4.1283131111467e-07	TIMP1	TIMP metallopeptidase inhibitor 1 [Source:HGNC Symbol;Acc:HGNC:11820]
ENSG00000102302	-0.614486627316125	6.69822316261361e-08	FGD1	FYVE, RhoGEF and PH domain containing 1 [Source:HGNC Symbol;Acc:HGNC:3663]
ENSG00000102359	2.55636733479642	3.96611140350337e-21	SRPX2	sushi repeat containing protein X-linked 2 [Source:HGNC Symbol;Acc:HGNC:30668]
ENSG00000102362	-0.838190340183937	5.4587622433662e-05	SYTL4	synaptotagmin like 4 [Source:HGNC Symbol;Acc:HGNC:15588]
ENSG00000102384	-1.33390771817096	2.42799970154955e-26	CENPI	centromere protein I [Source:HGNC Symbol;Acc:HGNC:3968]
ENSG00000102385	-0.789036942135064	3.6312674786163e-05	DRP2	dystrophin related protein 2 [Source:HGNC Symbol;Acc:HGNC:3032]
ENSG00000102409	3.31656537902142	1.94183873744512e-08	BEX4	brain expressed X-linked 4 [Source:HGNC Symbol;Acc:HGNC:25475]
ENSG00000102466	3.82218273659434	0.000595840848054892	FGF14	fibroblast growth factor 14 [Source:HGNC Symbol;Acc:HGNC:3671]
ENSG00000102606	-0.436145900616992	3.34923173231836e-11	ARHGEF7	Rho guanine nucleotide exchange factor 7 [Source:HGNC Symbol;Acc:HGNC:15607]
ENSG00000102683	5.14736588193001	0.000847183699339854	SGCG	sarcoglycan gamma [Source:HGNC Symbol;Acc:HGNC:10809]
ENSG00000102753	-0.499213557020987	9.79875231086828e-16	KPNA3	karyopherin subunit alpha 3 [Source:HGNC Symbol;Acc:HGNC:6396]
ENSG00000102781	-0.902236652256198	5.74026542060147e-11	KATNAL1	katanin catalytic subunit A1 like 1 [Source:HGNC Symbol;Acc:HGNC:28361]
ENSG00000102870	-0.439186591632159	1.05971474006516e-06	ZNF629	zinc finger protein 629 [Source:HGNC Symbol;Acc:HGNC:29008]
ENSG00000102882	-0.76150071196476	7.95884824613181e-06	MAPK3	mitogen-activated protein kinase 3 [Source:HGNC Symbol;Acc:HGNC:6877]
ENSG00000102897	0.466859112740675	0.000109296588742285	LYRM1	LYR motif containing 1 [Source:HGNC Symbol;Acc:HGNC:25074]
ENSG00000102898	-0.309298675056802	7.82995156325291e-05	NUTF2	nuclear transport factor 2 [Source:HGNC Symbol;Acc:HGNC:13722]
ENSG00000102901	-0.622447579724492	5.51080203771601e-07	CENPT	centromere protein T [Source:HGNC Symbol;Acc:HGNC:25787]
ENSG00000102908	0.449149864239303	0.000674395128408343	NFAT5	nuclear factor of activated T cells 5 [Source:HGNC Symbol;Acc:HGNC:7774]
ENSG00000102934	2.03984471990209	1.49530403820712e-10	PLLP	plasmolipin [Source:HGNC Symbol;Acc:HGNC:18553]
ENSG00000102935	3.85699180355956	4.60906400552184e-06	ZNF423	zinc finger protein 423 [Source:HGNC Symbol;Acc:HGNC:16762]
ENSG00000102977	-0.477926729012109	3.18070080402877e-14	ACD	ACD shelterin complex subunit and telomerase recruitment factor [Source:HGNC Symbol;Acc:HGNC:25070]
ENSG00000103005	0.471061701743965	2.8267430920782e-06	USB1	U6 snRNA biogenesis phosphodiesterase 1 [Source:HGNC Symbol;Acc:HGNC:25792]
ENSG00000103042	0.498755029008076	4.69226401984328e-12	SLC38A7	solute carrier family 38 member 7 [Source:HGNC Symbol;Acc:HGNC:25582]
ENSG00000103056	2.9795612370695	5.85527452137248e-09	SMPD3	sphingomyelin phosphodiesterase 3 [Source:HGNC Symbol;Acc:HGNC:14240]
ENSG00000103066	-0.54646538794674	8.7416641932372e-06	PLA2G15	phospholipase A2 group XV [Source:HGNC Symbol;Acc:HGNC:17163]
ENSG00000103067	1.71507368336871	9.38387198955413e-05	ESRP2	epithelial splicing regulatory protein 2 [Source:HGNC Symbol;Acc:HGNC:26152]
ENSG00000103089	3.33189739008127	1.05107759777739e-06	FA2H	fatty acid 2-hydroxylase [Source:HGNC Symbol;Acc:HGNC:21197]
ENSG00000103126	-0.260021746126888	0.000774282192546954	AXIN1	axin 1 [Source:HGNC Symbol;Acc:HGNC:903]
ENSG00000103145	-1.31202578123667	1.07066447376845e-10	HCFC1R1	host cell factor C1 regulator 1 [Source:HGNC Symbol;Acc:HGNC:21198]
ENSG00000103154	4.72963231451376	1.1679693763153e-134	NECAB2	N-terminal EF-hand calcium binding protein 2 [Source:HGNC Symbol;Acc:HGNC:23746]
ENSG00000103249	0.45290899287257	3.22747804073788e-05	CLCN7	chloride voltage-gated channel 7 [Source:HGNC Symbol;Acc:HGNC:2025]
ENSG00000103260	-0.842196399703373	3.10585621433389e-07	METRN	meteorin, glial cell differentiation regulator [Source:HGNC Symbol;Acc:HGNC:14151]
ENSG00000103274	-0.418273403874104	0.000944416131136273	NUBP1	nucleotide binding protein 1 [Source:HGNC Symbol;Acc:HGNC:8041]
ENSG00000103319	-0.720654038825659	3.42366097303314e-08	EEF2K	eukaryotic elongation factor 2 kinase [Source:HGNC Symbol;Acc:HGNC:24615]
ENSG00000103326	-0.554948384984965	7.77178173989841e-10	CAPN15	calpain 15 [Source:HGNC Symbol;Acc:HGNC:11182]
ENSG00000103335	-0.544418820024322	6.51230543073202e-09	PIEZO1	piezo type mechanosensitive ion channel component 1 [Source:HGNC Symbol;Acc:HGNC:28993]
ENSG00000103485	0.827347503583399	2.72238166142149e-10	QPRT	quinolinate phosphoribosyltransferase [Source:HGNC Symbol;Acc:HGNC:9755]
ENSG00000103495	-0.692026659596371	3.56118079140783e-12	MAZ	MYC associated zinc finger protein [Source:HGNC Symbol;Acc:HGNC:6914]
ENSG00000103507	-0.529788114719692	0.000151899517990723	BCKDK	branched chain keto acid dehydrogenase kinase [Source:HGNC Symbol;Acc:HGNC:16902]
ENSG00000103522	1.36263438533633	1.44475286462153e-22	IL21R	interleukin 21 receptor [Source:HGNC Symbol;Acc:HGNC:6006]
ENSG00000103569	2.36379149531435	4.8626861478216e-06	AQP9	aquaporin 9 [Source:HGNC Symbol;Acc:HGNC:643]
ENSG00000103653	-0.627979905588379	1.00788976941432e-08	CSK	C-terminal Src kinase [Source:HGNC Symbol;Acc:HGNC:2444]
ENSG00000103723	1.66528908746789	1.48596807011603e-09	AP3B2	adaptor related protein complex 3 subunit beta 2 [Source:HGNC Symbol;Acc:HGNC:567]
ENSG00000103742	2.65805052551428	4.12338408295403e-18	IGDCC4	immunoglobulin superfamily DCC subclass member 4 [Source:HGNC Symbol;Acc:HGNC:13770]
ENSG00000103855	-0.738242067747658	2.06895776970741e-06	CD276	CD276 molecule [Source:HGNC Symbol;Acc:HGNC:19137]
ENSG00000103942	-0.919210486924979	4.09726048712871e-07	HOMER2	homer scaffold protein 2 [Source:HGNC Symbol;Acc:HGNC:17513]
ENSG00000103966	-0.696837329134641	1.40630163586353e-12	EHD4	EH domain containing 4 [Source:HGNC Symbol;Acc:HGNC:3245]
ENSG00000103995	-0.634203036870924	5.25695692833269e-06	CEP152	centrosomal protein 152 [Source:HGNC Symbol;Acc:HGNC:29298]
ENSG00000104044	3.06614106828293	0.000865649295888383	OCA2	OCA2 melanosomal transmembrane protein [Source:HGNC Symbol;Acc:HGNC:8101]
ENSG00000104129	-1.15147184352915	1.03261040729637e-10	DNAJC17	DnaJ heat shock protein family (Hsp40) member C17 [Source:HGNC Symbol;Acc:HGNC:25556]
ENSG00000104147	-0.781726990880222	1.98874701478133e-11	OIP5	Opa interacting protein 5 [Source:HGNC Symbol;Acc:HGNC:20300]
ENSG00000104219	-0.740400148062237	1.43107460774298e-15	ZDHHC2	zinc finger DHHC-type containing 2 [Source:HGNC Symbol;Acc:HGNC:18469]
ENSG00000104231	1.06368893491644	0.000211031875632069	ZFAND1	zinc finger AN1-type containing 1 [Source:HGNC Symbol;Acc:HGNC:25858]
ENSG00000104237	1.28971942544876	2.85616310552715e-24	RP1	RP1 axonemal microtubule associated [Source:HGNC Symbol;Acc:HGNC:10263]
ENSG00000104267	0.718662175294628	4.07911052154442e-05	CA2	carbonic anhydrase 2 [Source:HGNC Symbol;Acc:HGNC:1373]
ENSG00000104312	0.721032705531797	8.66404916625852e-06	RIPK2	receptor interacting serine/threonine kinase 2 [Source:HGNC Symbol;Acc:HGNC:10020]
ENSG00000104321	2.4854979305272	3.60187350310333e-05	TRPA1	transient receptor potential cation channel subfamily A member 1 [Source:HGNC Symbol;Acc:HGNC:497]
ENSG00000104324	-0.490459864780362	6.69432864335396e-06	CPQ	carboxypeptidase Q [Source:HGNC Symbol;Acc:HGNC:16910]
ENSG00000104331	-0.60829346821526	1.49513146649304e-18	IMPAD1	inositol monophosphatase domain containing 1 [Source:HGNC Symbol;Acc:HGNC:26019]
ENSG00000104356	-0.743492094620592	5.94926843203255e-08	POP1	POP1 homolog, ribonuclease P/MRP subunit [Source:HGNC Symbol;Acc:HGNC:30129]
ENSG00000104368	2.4590141700215	3.79542531198633e-10	PLAT	plasminogen activator, tissue type [Source:HGNC Symbol;Acc:HGNC:9051]
ENSG00000104369	3.31039330937779	1.28013166761557e-23	JPH1	junctophilin 1 [Source:HGNC Symbol;Acc:HGNC:14201]
ENSG00000104375	-0.523738114578002	6.130792058002e-07	STK3	serine/threonine kinase 3 [Source:HGNC Symbol;Acc:HGNC:11406]
ENSG00000104388	-0.442752276954623	6.00121394585489e-11	RAB2A	RAB2A, member RAS oncogene family [Source:HGNC Symbol;Acc:HGNC:9763]
ENSG00000104413	3.67422201568998	1.86787354686205e-11	ESRP1	epithelial splicing regulatory protein 1 [Source:HGNC Symbol;Acc:HGNC:25966]
ENSG00000104415	3.23847157296613	0.000557499692097236	CCN4	cellular communication network factor 4 [Source:HGNC Symbol;Acc:HGNC:12769]
ENSG00000104419	-4.04765809473347	3.44098516782772e-14	NDRG1	N-myc downstream regulated 1 [Source:HGNC Symbol;Acc:HGNC:7679]
ENSG00000104447	0.909379094536743	2.15944750418572e-08	TRPS1	transcriptional repressor GATA binding 1 [Source:HGNC Symbol;Acc:HGNC:12340]
ENSG00000104518	-0.589624177663654	5.73495743878256e-05	GSDMD	gasdermin D [Source:HGNC Symbol;Acc:HGNC:25697]
ENSG00000104529	-0.499283626468914	1.400543056258e-08	EEF1D	eukaryotic translation elongation factor 1 delta [Source:HGNC Symbol;Acc:HGNC:3211]
ENSG00000104549	-0.897988419928742	8.08326433161348e-05	SQLE	squalene epoxidase [Source:HGNC Symbol;Acc:HGNC:11279]
ENSG00000104626	-0.643423778261344	1.07672767536318e-16	ERI1	exoribonuclease 1 [Source:HGNC Symbol;Acc:HGNC:23994]
ENSG00000104679	-0.398971999212845	4.80768397492344e-06	R3HCC1	R3H domain and coiled-coil containing 1 [Source:HGNC Symbol;Acc:HGNC:27329]
ENSG00000104728	-0.494158989284691	1.32636556847771e-06	ARHGEF10	Rho guanine nucleotide exchange factor 10 [Source:HGNC Symbol;Acc:HGNC:14103]
ENSG00000104738	-1.29442052356608	4.53145471632564e-14	MCM4	minichromosome maintenance complex component 4 [Source:HGNC Symbol;Acc:HGNC:6947]
ENSG00000104763	0.315109358637823	9.21549979501494e-07	ASAH1	N-acylsphingosine amidohydrolase 1 [Source:HGNC Symbol;Acc:HGNC:735]
ENSG00000104765	-0.805552106228894	3.71309076536236e-10	BNIP3L	BCL2 interacting protein 3 like [Source:HGNC Symbol;Acc:HGNC:1085]
ENSG00000104774	0.443482791185955	0.000193468052763531	MAN2B1	mannosidase alpha class 2B member 1 [Source:HGNC Symbol;Acc:HGNC:6826]
ENSG00000104783	1.29481124767347	0.000827241813978807	KCNN4	potassium calcium-activated channel subfamily N member 4 [Source:HGNC Symbol;Acc:HGNC:6293]
ENSG00000104805	-0.601027831514966	2.31753912050482e-05	NUCB1	nucleobindin 1 [Source:HGNC Symbol;Acc:HGNC:8043]
ENSG00000104812	-0.644506976328982	4.11457782973183e-05	GYS1	glycogen synthase 1 [Source:HGNC Symbol;Acc:HGNC:4706]
ENSG00000104823	0.411751911403629	6.73667561574747e-07	ECH1	enoyl-CoA hydratase 1 [Source:HGNC Symbol;Acc:HGNC:3149]
ENSG00000104824	-0.358029858016336	3.19888324968166e-06	HNRNPL	heterogeneous nuclear ribonucleoprotein L [Source:HGNC Symbol;Acc:HGNC:5045]
ENSG00000104833	2.37735328523158	3.76981304226796e-08	TUBB4A	tubulin beta 4A class IVa [Source:HGNC Symbol;Acc:HGNC:20774]
ENSG00000104835	-0.725800525478682	0.000466893176074451	SARS2	seryl-tRNA synthetase 2, mitochondrial [Source:HGNC Symbol;Acc:HGNC:17697]
ENSG00000104852	-0.511888942078009	1.42245904336743e-15	SNRNP70	small nuclear ribonucleoprotein U1 subunit 70 [Source:HGNC Symbol;Acc:HGNC:11150]
ENSG00000104853	-0.3483922587525	9.45779230718489e-07	CLPTM1	CLPTM1 regulator of GABA type A receptor forward trafficking [Source:HGNC Symbol;Acc:HGNC:2087]
ENSG00000104856	0.891012501008083	4.79097367741409e-21	RELB	RELB proto-oncogene, NF-kB subunit [Source:HGNC Symbol;Acc:HGNC:9956]
ENSG00000104866	-0.920985224210868	2.94069095455876e-13	PPP1R37	protein phosphatase 1 regulatory subunit 37 [Source:HGNC Symbol;Acc:HGNC:27607]
ENSG00000104870	-1.22818256460866	7.39616469974058e-08	FCGRT	Fc fragment of IgG receptor and transporter [Source:HGNC Symbol;Acc:HGNC:3621]
ENSG00000104872	-0.256528487282584	0.000182174081931117	PIH1D1	PIH1 domain containing 1 [Source:HGNC Symbol;Acc:HGNC:26075]
ENSG00000104881	-1.23799555478395	4.16830687375445e-26	PPP1R13L	protein phosphatase 1 regulatory subunit 13 like [Source:HGNC Symbol;Acc:HGNC:18838]
ENSG00000104884	-1.05863083156712	1.84536896669415e-17	ERCC2	ERCC excision repair 2, TFIIH core complex helicase subunit [Source:HGNC Symbol;Acc:HGNC:3434]
ENSG00000104885	-0.326777094942934	0.000438194758688634	DOT1L	DOT1 like histone lysine methyltransferase [Source:HGNC Symbol;Acc:HGNC:24948]
ENSG00000104886	-0.501077267911911	5.15023607237591e-09	PLEKHJ1	pleckstrin homology domain containing J1 [Source:HGNC Symbol;Acc:HGNC:18211]
ENSG00000104889	-0.686108068552983	3.61566033382431e-07	RNASEH2A	ribonuclease H2 subunit A [Source:HGNC Symbol;Acc:HGNC:18518]
ENSG00000104897	-0.507329915037614	4.07572400341853e-10	SF3A2	splicing factor 3a subunit 2 [Source:HGNC Symbol;Acc:HGNC:10766]
ENSG00000104951	1.48048455364521	1.52269826106225e-52	IL4I1	interleukin 4 induced 1 [Source:HGNC Symbol;Acc:HGNC:19094]
ENSG00000104953	0.962584489382984	0.000222872809353479	TLE6	TLE family member 6, subcortical maternal complex member [Source:HGNC Symbol;Acc:HGNC:30788]
ENSG00000104960	-0.648967332896881	6.25405079635575e-06	PTOV1	PTOV1 extended AT-hook containing adaptor protein [Source:HGNC Symbol;Acc:HGNC:9632]
ENSG00000104964	-0.372479817073027	0.000984925018460081	TLE5	TLE family member 5, transcriptional modulator [Source:HGNC Symbol;Acc:HGNC:307]
ENSG00000104969	-0.302844119378425	1.21621477225746e-05	SGTA	small glutamine rich tetratricopeptide repeat containing alpha [Source:HGNC Symbol;Acc:HGNC:10819]
ENSG00000104973	-0.746254740564678	2.6590931286187e-07	MED25	mediator complex subunit 25 [Source:HGNC Symbol;Acc:HGNC:28845]
ENSG00000104976	-0.599471739233685	4.1775542347442e-07	SNAPC2	small nuclear RNA activating complex polypeptide 2 [Source:HGNC Symbol;Acc:HGNC:11135]
ENSG00000104983	-0.597556518517692	2.16287296943594e-06	CCDC61	coiled-coil domain containing 61 [Source:HGNC Symbol;Acc:HGNC:33629]
ENSG00000105011	-0.895273257741236	3.73819861400187e-12	ASF1B	anti-silencing function 1B histone chaperone [Source:HGNC Symbol;Acc:HGNC:20996]
ENSG00000105048	-1.17802978186064	1.22468187439178e-08	TNNT1	troponin T1, slow skeletal type [Source:HGNC Symbol;Acc:HGNC:11948]
ENSG00000105063	-0.54513755528067	3.07869225988848e-18	PPP6R1	protein phosphatase 6 regulatory subunit 1 [Source:HGNC Symbol;Acc:HGNC:29195]
ENSG00000105135	-0.444207145404098	2.8079560222055e-06	ILVBL	ilvB acetolactate synthase like [Source:HGNC Symbol;Acc:HGNC:6041]
ENSG00000105136	1.01005057262646	3.76964547006994e-05	ZNF419	zinc finger protein 419 [Source:HGNC Symbol;Acc:HGNC:20648]
ENSG00000105137	-0.874342588347221	3.09426711051027e-17	SYDE1	synapse defective Rho GTPase homolog 1 [Source:HGNC Symbol;Acc:HGNC:25824]
ENSG00000105176	-0.438289370329157	2.38959315227143e-05	URI1	URI1 prefoldin like chaperone [Source:HGNC Symbol;Acc:HGNC:13236]
ENSG00000105185	-0.430824681305777	0.000107456966627158	PDCD5	programmed cell death 5 [Source:HGNC Symbol;Acc:HGNC:8764]
ENSG00000105186	-0.7688992670124	1.45500693089296e-16	ANKRD27	ankyrin repeat domain 27 [Source:HGNC Symbol;Acc:HGNC:25310]
ENSG00000105202	-0.634933618993162	3.38693116589683e-07	FBL	fibrillarin [Source:HGNC Symbol;Acc:HGNC:3599]
ENSG00000105220	-0.513401811126581	5.8351586447613e-16	GPI	glucose-6-phosphate isomerase [Source:HGNC Symbol;Acc:HGNC:4458]
ENSG00000105221	-0.598920753960238	2.67310987464672e-19	AKT2	AKT serine/threonine kinase 2 [Source:HGNC Symbol;Acc:HGNC:392]
ENSG00000105245	-1.28062031051605	1.10837207013736e-09	NUMBL	NUMB like endocytic adaptor protein [Source:HGNC Symbol;Acc:HGNC:8061]
ENSG00000105246	2.64136446558683	7.40823497201936e-36	EBI3	Epstein-Barr virus induced 3 [Source:HGNC Symbol;Acc:HGNC:3129]
ENSG00000105248	-0.565050767483452	0.000212699978070501	YJU2	YJU2 splicing factor homolog [Source:HGNC Symbol;Acc:HGNC:25518]
ENSG00000105254	-0.720044947004162	4.62448387441916e-31	TBCB	tubulin folding cofactor B [Source:HGNC Symbol;Acc:HGNC:1989]
[truncated: 5,680 more rows]

## Sheet: WT_vs_R167Q
Gene	log2FoldChange	padj	hgnc_symbol	description
[truncated: 1,319 more rows]
